# Supplementary material for: Gene expression in superior temporal cortex of schizophrenia patients
Source: Springer Nature journal article supplement (doi:10.1007/s00406-013-0473-5), 2013-11-27
Supplement: MOESM1 [file 8440964]

## Sheet: Sheet1
Sequence ID	Sequence Code	Sequence Name(s)	Sequence Description	Accession #	Intensity1:Control	Intensity2:Control	Fold Change	heteroskedastisch	Primary Sequence Name	GO List	GO Term List	Primary Sequence Name	BNE_SCHIZ_Control_59/02	BNE_SCHIZ_Control_RZ77	BNE_SCHIZ_Control_RZ84	BNE_SCHIZ_Control_RZ99	BNE_SCHIZ_Control_73/02	BNE_SCHIZ_Control_43/01	BNE_SCHIZ_Control_61/01	BNE_SCHIZ_Control_57/02	BNE_SCHIZ_Disease_39/02	BNE_SCHIZ_Disease_50/01	BNE_SCHIZ_Disease_35/00	BNE_SCHIZ_Disease_13/00	BNE_SCHIZ_Disease_43/03	BNE_SCHIZ_Disease_1/00	BNE_SCHIZ_Disease_46/00	BNE_SCHIZ_Disease_83/01	BNE_SCHIZ_Disease_36/02	BNE_SCHIZ_Control_02/02/2007	BNE_SCHIZ_Control_51/02	BNE_SCHIZ_Disease_39/03	Max
1386380	ILMN_24027	MLL3	Homo sapiens myeloid/lymphoid or mixed-lineage leukemia 3 (MLL3), transcript variant 1, mRNA.	NM_021230.1	0.19764	0.325	1.63538	1.59524e-05	MLL3	0006355;0016567;0006350;0016568;0004842;0046872;0016740;0008270;0005515;0018024;0003677;0008168;000151;005634	regulation of transcription DNA-dependent ;protein ubiquitination ;transcription ;chromatin modification ;ubiquitin-protein ligase activity ;metal ion binding ;transferase activity ;zinc ion binding ;protein binding ;histone-lysine N-methyltransferase activity ;DNA binding ;methyltransferase activity ;ubiquitin ligase complex ;nucleus	MLL3	99.2868	98.1975	87.4661	103.213	110.226	119.595	109.824	52.8096	178.462	150.447	134.178	178.694	168.636	178.632	121.686	118.179	181.254	85.8401	103.329	152.765	181.254
1394806	ILMN_1364	FLJ23754	Homo sapiens hypothetical protein FLJ23754 (FLJ23754), mRNA.	NM_152675.1	0.08196	0.18259	2.21543	0.000199827	FLJ23754	0006955;0007165;0007610;0007187;0004949;0004872;0005887;0005886	immune response ;signal transduction ;behavior ;G-protein signaling coupled to cyclic nucleotide second messenger ;cannabinoid receptor activity ;receptor activity ;integral to plasma membrane ;plasma membrane	FLJ23754	33.8232	27.8098	49.2643	22.9904	30.2395	49.7992	69.8818	49.0639	44.3896	105.812	42.361	98.046	95.5315	92.4024	74.6608	80.5731	83.6055	58.8156	39.5003	144.295	144.295
1380241	ILMN_5293	XBP1	Homo sapiens X-box binding protein 1 (XBP1), mRNA.	NM_005080.2	0.77705	0.56588	-1.38079	0.000206342	XBP1	0006955;0006355;0006350;0046983;0003700;0043565;0005634	immune response ;regulation of transcription DNA-dependent ;transcription ;protein dimerization activity ;transcription factor activity ;sequence-specific DNA binding ;nucleus	XBP1	454.068	400.84	398.815	351.127	426.428	498.424	330.042	268.27	323.322	245.445	299.955	260.81	268.97	278.665	259.018	190.398	303.437	407.315	384.673	351.626	498.424
1377022	ILMN_9774	TRIM29	Homo sapiens tripartite motif-containing 29 (TRIM29), transcript variant 1, mRNA.	NM_012101.2	0.34925	0.51705	1.47228	0.000305589	TRIM29	0006366;0046872;0008270;0005515;0003700;0005622	transcription from RNA polymerase II promoter ;metal ion binding ;zinc ion binding ;protein binding ;transcription factor activity ;intracellular	TRIM29	148.159	102.829	223.279	225.141	156.346	205.295	164.534	173.374	207.536	287.35	221.39	259.907	323.186	296.675	168.621	240.528	257.371	159.113	143.006	268.339	323.186
1383003	ILMN_28817	FLJ16636	Homo sapiens FLJ16636 protein (FLJ16636), mRNA.	NM_001001662.1	0.09769	0.15392	1.56686	0.000337701	FLJ16636	0006355;0008270;0003677;0005634	regulation of transcription DNA-dependent ;zinc ion binding ;DNA binding ;nucleus	FLJ16636	46.276	59.7333	50.5722	42.1977	51.5978	44.1513	57.0709	33.2841	73.1033	102.711	55.5055	83.4502	77.3116	67.2919	72.9826	66.829	74.8449	53.8092	64.6412	60.3103	102.711
1397401	ILMN_10054	C1orf60	Homo sapiens chromosome 1 open reading frame 60 (C1orf60), mRNA.	NM_023015.3	2.19391	2.77138	1.25626	0.000385831	C1orf60	0006388;0006355;0006350;000213;0003677;000214	tRNA splicing ;regulation of transcription DNA-dependent ;transcription ;tRNA-intron endonuclease activity ;DNA binding ;tRNA-intron endonuclease complex	C1orf60	1114.27	1103.38	1140.43	1176.37	1181.69	1302.99	1382.3	1122.37	1426.65	1531.2	1243.77	1608.93	1397.47	1710.96	1509.67	1743.87	1498.61	1137.21	950.352	1159.56	1743.87
1382595	ILMN_29369	MGC3020	Homo sapiens hypothetical protein MGC3020 (MGC3020), mRNA.	NM_024048.2	0.24695	0.33973	1.36815	0.000417461	MGC3020	0007275;0004872;0016020	development ;receptor activity ;membrane	MGC3020	110.214	119.056	134.67	114.243	129.257	113.869	116.661	119.751	156.357	190.82	127.577	182.604	139.706	141.173	132.884	192.049	157.269	123.521	116.222	200.829	200.829
1382832	ILMN_29029	CFD	Homo sapiens complement factor D (adipsin) (CFD), mRNA.	NM_001928.2	0.27854	0.17259	-1.6228	0.000419204	CFD	0006957;0045087;0006508;0008233;0003817	complement activation alternative pathway ;innate immune response ;proteolysis and peptidolysis ;peptidase activity ;complement factor D activity	CFD	95.821	122.337	128.651	142.533	123.291	162.931	101.881	144.775	74.2563	136.542	62.2454	56.0994	93.5816	67.6814	86.6039	58.2122	77.7822	202.932	120.361	103.69	202.932
1392432	ILMN_15856	FLJ36166	Homo sapiens hypothetical protein FLJ36166 (FLJ36166), mRNA.	NM_182634.2	0.11601	0.17111	1.46687	0.0005271	FLJ36166	0004;0005554;000139	biological process unknown ;molecular function unknown ;Golgi membrane	FLJ36166	51.1631	22.9333	61.5337	38.9053	46.2754	62.3724	60.7866	77.6695	67.8278	88.305	67.8037	85.0713	73.2695	94.9623	57.0644	81.7041	80.1163	87.1834	84.5287	117.748	117.748
1390820	ILMN_18019	USP21	Homo sapiens ubiquitin specific peptidase 21 (USP21), transcript variant 1, mRNA.	NM_012475.4	0.40284	0.522	1.28866	0.00075592	USP21	0006511;0006512;0004197;0008233;0004221;0005515;0008372	ubiquitin-dependent protein catabolism ;ubiquitin cycle ;cysteine-type endopeptidase activity ;peptidase activity ;ubiquitin thiolesterase activity ;protein binding ;cellular component unknown	USP21	184.078	190.501	194.521	173.97	193.878	234.501	214.665	204.928	197.101	248.07	195.706	281.519	283.158	250.74	278.815	247.342	273.125	219.862	149.963	298.584	298.584
1389004	ILMN_20489	GPD1L	Homo sapiens glycerol-3-phosphate dehydrogenase 1-like (GPD1L), mRNA.	NM_015141.2	6.50918	7.95936	1.21605	0.000775796	GPD1L	0046168;0005975;0004367;0051287;0009331;0005737	glycerol-3-phosphate catabolism ;carbohydrate metabolism ;glycerol-3-phosphate dehydrogenase (NAD+) activity ;NAD binding ;glycerol-3-phosphate dehydrogenase complex ;cytoplasm	GPD1L	4112.02	4004.54	3518.95	3832.56	3444.29	3332.67	3686.74	5000.23	4088.18	4571.07	4008.45	3739.75	5525.87	3992.55	4403.24	5506.82	4694.36	3123.57	3148.02	4795.28	5525.87
1381490	ILMN_3644	DNAH7	Homo sapiens dynein, axonemal, heavy polypeptide 7 (DNAH7), mRNA.	NM_018897.1	0.16919	0.25453	1.49609	0.000778041	DNAH7	0001539;0016887;0003777;0005524;0005858	ciliary or flagellar motility ;ATPase activity ;microtubule motor activity ;ATP binding ;axonemal dynein complex	DNAH7	63.6668	78.2304	72.3262	74.0102	95.6928	72.7014	114.519	98.8118	121.129	138.455	98.5331	173.077	90.2587	104.482	113.529	132.779	142.683	88.3721	74.4475	100.657	173.077
1397432	ILMN_10096	TXNDC4	Homo sapiens thioredoxin domain containing 4 (endoplasmic reticulum) (TXNDC4), mRNA.	NM_015051.1	0.30154	0.37298	1.23006	0.000793756	TXNDC4	0030503;0045045;0006986;0009100;0006118;0006457;0051082;0005489;0003756;0005789;0005788;0005793	regulation of cell redox homeostasis ;secretory pathway ;response to unfolded protein ;glycoprotein metabolism ;electron transport ;protein folding ;unfolded protein binding ;electron transporter activity ;protein disulfide isomerase activity ;endoplasmic reticulum membrane ;endoplasmic reticulum lumen ;ER-Golgi intermediate compartment	TXNDC4	165.521	112.561	145.114	128.406	146.993	125.913	128.996	166.609	178.914	168.441	137.336	190.029	167.148	217.689	176.5	167.785	200.611	162.054	176.463	189.843	217.689
1389453	ILMN_20030	NEUROG2	Homo sapiens neurogenin 2 (NEUROG2), mRNA.	NM_024019.2	0.05712	0.1174	2.04388	0.000879228	NEUROG2	0006355;0030154;0007399;0030528;0003677;0005634	regulation of transcription DNA-dependent ;cell differentiation ;neurogenesis ;transcription regulator activity ;DNA binding ;nucleus	NEUROG2	21.3309	27.3944	12.0987	39.357	20.3042	44.2655	33.5391	43.3462	46.7482	50.7517	49.616	52.0779	37.1379	39.8739	58.0958	66.619	51.4887	28.6864	32.2597	113.4	113.4
1397278	ILMN_10309	FBXO25	Homo sapiens F-box protein 25 (FBXO25), transcript variant 3, mRNA.	NM_012173.3	0.06058	0.03839	-1.58664	0.000931866	FBXO25	0016567;0004842;000151	protein ubiquitination ;ubiquitin-protein ligase activity ;ubiquitin ligase complex	FBXO25	28.6154	16.8849	25.8434	18.2108	33.5179	24.9699	36.6156	46.0411	23.1298	15.2904	12.5946	17.2936	20.0802	22.2292	9.28522	20.9634	24.9624	51.6972	50.9902	27.1395	51.6972
1391882	ILMN_16651	ENO3	Homo sapiens enolase 3 (beta, muscle) (ENO3), transcript variant 1, mRNA.	NM_001976.2	0.15462	0.25856	1.66297	0.000982631	ENO3	0006096;0016829;0004634;000287;00015	glycolysis ;lyase activity ;phosphopyruvate hydratase activity ;magnesium ion binding ;phosphopyruvate hydratase complex	ENO3	75.3755	54.8055	53.2953	66.4217	81.7697	85.7851	77.1965	73.5993	92.7596	170.003	74.7236	145.583	105.475	125.924	100.743	135.606	88.8524	114.165	83.3421	177.96	177.96
1382359	ILMN_29705	MFSD1	Homo sapiens major facilitator superfamily domain containing 1 (MFSD1), mRNA.	NM_022736.1	1.72978	1.28894	-1.34946	0.00103392	MFSD1	0006810;0005215;0016020;0016021	transport ;transporter activity ;membrane ;integral to membrane	MFSD1	834.25	712.243	1063.25	934.73	1187.78	1046.41	781.074	740.591	692.602	754.534	804.804	896.031	461.35	605.746	682.302	484.611	670.448	881.353	817.568	624.975	1187.78
1380919	ILMN_4451	MNDA	Homo sapiens myeloid cell nuclear differentiation antigen (MNDA), mRNA.	NM_002432.1	0.21904	0.1116	-1.97362	0.00137235	MNDA	0006355;0006350;0006968;0003677;0005634	regulation of transcription DNA-dependent ;transcription ;cellular defense response ;DNA binding ;nucleus	MNDA	79.9371	82.003	91.5857	122.231	188.247	116.527	58.9593	90.6453	63.0287	53.6611	51.583	32.8165	36.4865	100.346	62.8637	12.7273	53.3898	98.2426	147.826	74.8622	188.247
1385081	ILMN_2594	CRB1	Homo sapiens crumbs homolog 1 (Drosophila) (CRB1), transcript variant 2, mRNA.	NM_201253.1	0.11094	0.22185	1.98871	0.00137732	CRB1	0007600;0007267;0007163;0007601;0005509;0016021	sensory perception ;cell-cell signaling ;establishment and/or maintenance of cell polarity ;visual perception ;calcium ion binding ;integral to membrane	CRB1	82.7314	44.4383	23.8907	38.8362	72.2507	50.4552	72.5129	53.5354	66.9568	148.82	59.5042	161.674	77.6954	123.264	81.9264	72.3695	103.831	62.1712	60.4006	159.12	161.674
1385871	ILMN_24839	LOC91461	Homo sapiens hypothetical protein BC007901 (LOC91461), mRNA.	NM_138370.1	0.2291	0.33979	1.47501	0.00142608	LOC91461	0006457;0031072;0005488;0051082	protein folding ;heat shock protein binding ;binding ;unfolded protein binding	LOC91461	103.148	77.5376	132.079	140.356	129.984	152.246	148.566	82.0199	130.956	195.355	142.961	145.412	155.904	190.084	140.086	171.764	199.16	90.5679	71.9863	156.186	199.16
1379317	ILMN_6704	WDR33	Homo sapiens WD repeat domain 33 (WDR33), transcript variant 3, mRNA.	NM_001006623.1	0.73357	0.9927	1.34578	0.00143178	WDR33	0006817;0007283;0006301;0005554;0005737;0005634	phosphate transport ;spermatogenesis ;postreplication repair ;molecular function unknown ;cytoplasm ;nucleus	WDR33	355.93	266.029	325.492	346.49	449.075	440.829	362.065	499.417	469.173	522.297	415.578	565.398	574.802	634.284	458.442	445.052	608.056	327.61	291.651	370.357	634.284
1393697	ILMN_14020	MLL3	Homo sapiens myeloid/lymphoid or mixed-lineage leukemia 3 (MLL3), transcript variant 2, mRNA.	NM_170606.1	0.1877	0.25967	1.37583	0.00143577	MLL3	0006355;0016567;0006350;0016568;0004842;0046872;0016740;0008270;0005515;0018024;0003677;0008168;000151;005634	regulation of transcription DNA-dependent ;protein ubiquitination ;transcription ;chromatin modification ;ubiquitin-protein ligase activity ;metal ion binding ;transferase activity ;zinc ion binding ;protein binding ;histone-lysine N-methyltransferase activity ;DNA binding ;methyltransferase activity ;ubiquitin ligase complex ;nucleus	MLL3	96.4058	72.6573	100.287	89.4689	103.442	85.426	71.6486	83.7672	120.329	122.204	106.381	172.853	118.022	135.132	109.501	107.536	156.792	92.7102	121.803	95.4661	172.853
1386557	ILMN_23844	ARL6IP4	Homo sapiens ADP-ribosylation-like factor 6 interacting protein 4 (ARL6IP4), transcript variant 4, mRNA.	NM_001002252.1	0.06353	0.08907	1.39421	0.00146203	ARL6IP4	0046872;0008270	metal ion binding ;zinc ion binding	ARL6IP4	32.0184	31.9745	36.7825	25.6393	34.6549	37.4933	28.4112	20.9279	34.8452	56.107	25.3876	48.9839	45.8304	50.0088	38.7607	45.7468	41.8332	34.5711	56.9873	53.0599	56.9873
1385953	ILMN_24736	C17orf69	Homo sapiens chromosome 17 open reading frame 69 (C17orf69), mRNA.	NM_152466.1	0.58797	0.86549	1.46387	0.00147212	C17orf69	0045087;0007283;0016337;0009566;0006952;0005554;0005578;0042581	innate immune response ;spermatogenesis ;cell-cell adhesion ;fertilization ;defense response ;molecular function unknown ;extracellular matrix (sensu Metazoa) ;specific granule	C17orf69	221.766	277.857	195.254	344.556	351.248	355.085	363.841	416.729	381.748	491.445	299.118	338.204	475.092	454.035	410.17	489.343	490.183	200.118	192.035	534.578	534.578
1381923	ILMN_3095	MEIS2	Homo sapiens Meis1, myeloid ecotropic viral integration site 1 homolog 2 (mouse) (MEIS2), transcript variant e, mRNA.	NM_020149.2	1.16504	1.45948	1.24583	0.00155865	MEIS2	0006355;000122;0003714;0003704;0003700;0005634	regulation of transcription DNA-dependent ;negative regulation of transcription from RNA polymerase II promoter ;transcription corepressor activity ;specific RNA polymerase II transcription factor activity ;transcription factor activity ;nucleus	MEIS2	715.194	691.138	473.128	680.375	626.817	578.876	630.592	619.91	657.656	837.11	588.044	771.685	868.43	801.656	843.987	642.685	832.067	468.118	507.582	786.751	868.43
1389838	ILMN_1948	KIAA1287	Homo sapiens KIAA1287 (KIAA1287), mRNA.	NM_020748.1	0.56238	0.6796	1.20178	0.00172259	KIAA1287	0050666;0006479;0047150;0016740;0008270;0008898;0008168	regulation of homocysteine metabolism ;protein amino acid methylation ;betaine-homocysteine S-methyltransferase activity ;transferase activity ;zinc ion binding ;homocysteine S-methyltransferase activity ;methyltransferase activity	KIAA1287	304.273	217.708	262.937	303.404	320.855	308.763	235.069	280.936	386.922	314.233	356.695	403.46	383.341	339.574	295.556	320.862	305.314	262.756	274.085	284.111	403.46
1381588	ILMN_3543	ARHGAP15	Homo sapiens Rho GTPase activating protein 15 (ARHGAP15), mRNA.	NM_018460.2	0.17767	0.11667	-1.53133	0.00187806	ARHGAP15	5096	GTPase activator activity	ARHGAP15	64.9832	62.6622	92.6688	88.6351	121.759	121.267	69.2526	78.1732	49.3572	75.1605	50.8616	62.0573	74.7725	56.426	43.7197	40.8446	65.6378	91.0981	91.9285	44.3723	121.759
1381777	ILMN_3124	RFWD3	Homo sapiens ring finger and WD repeat domain 3 (RFWD3), mRNA.	NM_018124.3	0.2237	0.29101	1.29368	0.00188686	RFWD3	0016567;0004842;0008270;000151	protein ubiquitination ;ubiquitin-protein ligase activity ;zinc ion binding ;ubiquitin ligase complex	RFWD3	93.9493	120.998	73.3609	109.181	104.375	122.634	104.493	124.139	145.03	127.58	125.968	152.436	143.007	151.619	127.942	152.362	168.77	109.681	121.527	102.723	168.77
1392032	ILMN_1642	SOX5	Homo sapiens SRY (sex determining region Y)-box 5 (SOX5), transcript variant 2, mRNA.	NM_152989.2	0.05289	0.07728	1.45299	0.00189176	SOX5	0006355;0006350;0006366;0003700;0005634	regulation of transcription DNA-dependent ;transcription ;transcription from RNA polymerase II promoter ;transcription factor activity ;nucleus	SOX5	23.2411	32.6004	20.7138	26.8632	24.8775	28.2193	34.8923	26.8435	21.8134	48.7692	28.4752	32.4524	39.6159	48.361	29.1904	41.334	37.4371	39.4517	24.0225	60.9447	60.9447
1389825	ILMN_19451	ZNF605	Homo sapiens zinc finger protein 605 (ZNF605), mRNA.	NM_183238.1	0.24436	0.34434	1.40139	0.00203414	ZNF605	0006355;0003676;0008270;0005634	regulation of transcription DNA-dependent ;nucleic acid binding ;zinc ion binding ;nucleus	ZNF605	95.2237	87.2396	151.934	125.609	154.528	152.613	138.853	112.351	149.71	191.043	120.165	173.721	190.069	151.633	123.27	174.823	206.549	94.5184	86.6772	169.954	206.549
1393110	ILMN_14789	RRM1	Homo sapiens ribonucleotide reductase M1 polypeptide (RRM1), mRNA.	NM_001033.2	3.31732	2.75808	-1.20943	0.00211831	RRM1	0006260;0004748;000166;0016491;0005524;0005971	DNA replication ;ribonucleoside-diphosphate reductase activity ;nucleotide binding ;oxidoreductase activity ;ATP binding ;ribonucleoside-diphosphate reductase complex	RRM1	1745.2	1784.11	1878.89	1514.26	1709.04	1747.49	1850.96	2245.04	1551.4	1195.55	1600.97	1401.57	1097.87	1507.83	1626.7	1820.79	1610.44	1747.14	1821.55	1368.67	2245.04
1388949	ILMN_20641	ZNF169	Homo sapiens zinc finger protein 169 (ZNF169), mRNA.	NM_194320.1	0.04314	0.0732	1.68736	0.00224492	ZNF169	0006355;0006350;0046872;0003676;0008270;0003700;0005622;0005634	regulation of transcription DNA-dependent ;transcription ;metal ion binding ;nucleic acid binding ;zinc ion binding ;transcription factor activity ;intracellular ;nucleus	ZNF169	13.8407	14.8746	27.6124	16.9856	22.2786	27.3668	24.5573	27.1297	23.5898	53.3988	19.5188	38.0187	28.6902	51.1943	27.2293	41.0814	46.2877	31.0814	31.304	37.0929	53.3988
1382178	ILMN_29909	C8orf78	Homo sapiens chromosome 8 open reading frame 78 (C8orf78), mRNA.	NM_182525.1	0.05501	0.1012	1.82939	0.00225147	C8orf78	0045449;0005634	regulation of transcription ;nucleus	C8orf78	26.44	26.3959	29.2332	47.0511	17.1888	30.8628	42.8383	25.9862	50.6744	30.1143	47.4205	33.3204	67.5421	36.1354	58.1199	51.7145	64.6001	20.8186	12.8928	51.5238	67.5421
1388059	ILMN_21803	C9orf45	Homo sapiens chromosome 9 open reading frame 45 (C9orf45), mRNA.	NM_030814.4	2.28466	3.217	1.40033	0.00242061	C9orf45	0007600;0007165;0007186;0007608;0004984;0004872;0016021	sensory perception ;signal transduction ;G-protein coupled receptor protein signaling pathway ;sensory perception of smell ;olfactory receptor activity ;receptor activity ;integral to membrane	C9orf45	1452.61	1441.92	1440.22	1448.46	1308.98	1062.51	1475.35	1522.58	1615.92	1733.3	1501.81	1637.28	1838.59	2019.99	1317.44	2041.4	2221.71	641.443	555.831	1366.08	2221.71
1381969	ILMN_3028	FLJ20186	Homo sapiens hypothetical protein FLJ20186 (FLJ20186), transcript variant 1, mRNA.	NM_207514.1	2.35318	2.87565	1.21529	0.00245484	FLJ20186	7242	intracellular signaling cascade	FLJ20186	1158.79	1175.9	1103.78	1353.47	1239.48	1533.1	1314.7	1269.48	1136.72	1691.29	1318.79	1581.61	1478.81	1634.68	1576.5	1641.39	1636.02	1134.39	1211.13	1677.03	1691.29
1382324	ILMN_29893	FRS3	Homo sapiens fibroblast growth factor receptor substrate 3 (FRS3), mRNA.	NM_006653.3	1.56077	1.97257	1.25688	0.0024917	FRS3	0007165;0008543;0005158;0016020	signal transduction ;fibroblast growth factor receptor signaling pathway ;insulin receptor binding ;membrane	FRS3	691.597	755.854	710.238	923.575	797.162	889.187	1184.77	753.691	957.784	927.617	953.719	912.353	1093.95	1109.34	1226.15	1189.55	1142.03	859.687	571.602	956.002	1226.15
1380451	ILMN_5130	LNK	Homo sapiens lymphocyte adaptor protein (LNK), mRNA.	NM_005475.1	0.88503	0.64313	-1.38376	0.00252089	LNK	7242	intracellular signaling cascade	LNK	436.463	348.519	644.781	446.822	460.862	560.065	457.209	330.859	321.788	347.269	333.283	287.444	328.272	323.539	346.902	290.544	342.428	313.516	489.466	271.212	644.781
1382106	ILMN_30038	RAB7	Homo sapiens RAB7, member RAS oncogene family (RAB7), mRNA.	NM_004637.5	9.59929	10.8043	1.11933	0.002598	RAB7	0006897;0006886;0007264;000166;0003924;0005525;0005770;0005764	endocytosis ;intracellular protein transport ;small GTPase mediated signal transduction ;nucleotide binding ;GTPase activity ;GTP binding ;late endosome ;lysosome	RAB7	6148.93	7115.15	4944.92	5120.44	5499.45	5614.18	5534.66	6172.1	5808.62	6909.31	6122.41	6469.18	6445.32	5913.69	6039.76	6754.63	6225.79	5882.33	4841.85	5423.46	7115.15
1394601	ILMN_137078	FLJ13909	Homo sapiens hypothetical protein FLJ13909 (FLJ13909), mRNA.	NM_025108.1	0.10326	0.15906	1.53196	0.00261049	FLJ13909	0006355;0009653;0030528;0003677;0005667;0005634	regulation of transcription DNA-dependent ;morphogenesis ;transcription regulator activity ;DNA binding ;transcription factor complex ;nucleus	FLJ13909	43.7392	41.8568	71.8299	78.65	40.0319	58.9413	61.6398	43.9215	65.1547	68.3851	73.6719	55.6526	77.946	91.2393	58.6768	83.1126	64.5598	47.2786	38.7957	116.983	116.983
1388407	ILMN_21415	CTRL	Homo sapiens chymotrypsin-like (CTRL), mRNA.	NM_001907.1	0.09013	0.12196	1.34568	0.00261938	CTRL	0007586;0006508;0008233;0004263;0004295;0005615	digestion ;proteolysis and peptidolysis ;peptidase activity ;chymotrypsin activity ;trypsin activity ;extracellular space	CTRL	32.9669	41.8871	40.188	38.9114	41.2138	49.8108	50.0251	51.025	49.2027	62.1904	30.4162	58.9242	68.1656	56.0403	47.5648	60.6148	72.8298	59.2897	68.3172	82.7108	82.7108
1385313	ILMN_25625	PHC1	Homo sapiens polyhomeotic-like 1 (Drosophila) (PHC1), mRNA.	NM_004426.2	0.22567	0.3011	1.3269	0.00269473	PHC1	0007275;0046872;0005515;0003677;0005634	development ;metal ion binding ;protein binding ;DNA binding ;nucleus	PHC1	88.2577	94.92	130.242	120.575	105.777	105.135	138.166	89.1177	145.012	183.809	121.413	132.879	173.447	116.779	108.866	158.397	155.19	92.7486	134.864	138.072	183.809
1390571	ILMN_18299	TRPV1	Homo sapiens transient receptor potential cation channel, subfamily V, member 1 (TRPV1), transcript variant 4, mRNA.	NM_080705.2	0.08711	0.11906	1.35921	0.00269996	TRPV1	0006816;0006812;0005262;0005516;0004872;0005509;0005261;0016021;0016020	calcium ion transport ;cation transport ;calcium channel activity ;calmodulin binding ;receptor activity ;calcium ion binding ;cation channel activity ;integral to membrane ;membrane	TRPV1	41.2629	26.9561	41.4096	39.714	54.5427	47.0519	36.886	46.377	41.607	45.0548	49.4319	76.3342	52.1396	63.3703	56.815	62.0138	66.5702	60.4938	65.1173	64.452	76.3342
1387052	ILMN_23209	DPT	Homo sapiens dermatopontin (DPT), mRNA.	NM_001937.3	0.04611	0.07928	1.71004	0.00270215	DPT	0007155;0005515;0005578	cell adhesion ;protein binding ;extracellular matrix (sensu Metazoa)	DPT	23.6396	18.6381	16.065	10.6066	15.8426	22.1362	26.5115	37.8299	12.5188	37.7519	35.595	32.0253	54.032	34.3392	39.7541	60.543	31.9338	43.1584	43.1857	54.8849	60.543
1382369	ILMN_2972	KIAA0247	Homo sapiens KIAA0247 (KIAA0247), mRNA.	NM_014734.2	0.75929	0.59565	-1.2818	0.00285879	KIAA0247	0004;0005554;0016021	biological process unknown ;molecular function unknown ;integral to membrane	KIAA0247	397.665	358.413	403.342	423.093	347.851	412.335	261.901	296.01	331.319	274.147	323.678	358.402	276.652	275.527	269.402	292.864	307.119	485.304	412.689	241.305	485.304
1385706	ILMN_25058	NUMA1	Homo sapiens nuclear mitotic apparatus protein 1 (NUMA1), mRNA.	NM_006185.2	0.10836	0.1549	1.42158	0.00286484	NUMA1	0006997;00090;0003824;0005198;0005515;0005876;0005634	nuclear organization and biogenesis ;mitotic anaphase ;catalytic activity ;structural molecule activity ;protein binding ;spindle microtubule ;nucleus	NUMA1	43.4324	39.5733	64.7325	50.5116	45.7111	70.1835	38.4203	57.9557	46.4335	74.5422	60.8158	77.7206	86.9805	89.2399	65.6633	76.0376	75.4151	98.58	46.6624	85.1712	98.58
1393001	ILMN_15084	ZNF545	Homo sapiens zinc finger protein 545 (ZNF545), mRNA.	NM_133466.1	0.46259	0.6368	1.36903	0.0029293	ZNF545	0006355;0046872;0003676;0008270;0005634	regulation of transcription DNA-dependent ;metal ion binding ;nucleic acid binding ;zinc ion binding ;nucleus	ZNF545	269.186	340.21	168.558	237.241	284.25	244.992	223.97	196.198	310.269	274.688	298.659	257.972	366.618	361.7	344.458	286.094	374.739	138.568	179.786	284.262	374.739
1379484	ILMN_6492	GALK2	Homo sapiens galactokinase 2 (GALK2), transcript variant 2, mRNA.	NM_001001556.1	0.70396	0.85513	1.20805	0.00296361	GALK2	0006012;0008152;0046835;000166;0016301;0004335;0016740;0005524;0005737	galactose metabolism ;metabolism ;carbohydrate phosphorylation ;nucleotide binding ;kinase activity ;galactokinase activity ;transferase activity ;ATP binding ;cytoplasm	GALK2	387.778	389.366	329.295	311.015	328.408	386.603	336.266	364.137	426.436	456.405	346.341	488.105	538.818	398.68	364.717	439.07	402.7	340.642	341.813	447.133	538.818
1396822	ILMN_10756	GSDM1	Homo sapiens gasdermin 1 (GSDM1), mRNA.	NM_178171.2	0.06723	0.04029	-1.67784	0.00300598	GSDM1	0004111;0005737	creatine kinase activity ;cytoplasm	GSDM1	29.9061	27.4782	42.1682	12.1291	15.0871	35.0067	42.4406	42.2575	16.1214	21.2132	14.4952	18.4276	10.8104	24.4675	18.8564	30.1056	11.9984	56.7578	62.739	39.5818	62.739
1380162	ILMN_541	DCX	Homo sapiens doublecortex; lissencephaly, X-linked (doublecortin) (DCX), transcript variant 4, mRNA.	NM_178151.1	0.38628	0.55004	1.41608	0.00302583	DCX	0007242;0030154;0007417;0008017;0005856;0005875	intracellular signaling cascade ;cell differentiation ;central nervous system development ;microtubule binding ;cytoskeleton ;microtubule associated complex	DCX	145.621	262.794	195.662	264.545	174.601	174.34	252.24	168.96	247.153	286.815	259.07	237.519	333.778	266.602	256.338	321.374	304.725	95.8266	163.274	196.146	333.778
1391033	ILMN_17888	C10orf38	Homo sapiens chromosome 10 open reading frame 38 (C10orf38), mRNA.	NM_001010924.1	6.9147	8.62805	1.2409	0.00315504	C10orf38	0009968;0008277;000188;0004871;0005096;0005515;0016020;0005829;005634	negative regulation of signal transduction ;regulation of G-protein coupled receptor protein signaling pathway ;inactivation of MAPK activity ;signal transducer activity ;GTPase activator activity ;protein binding ;membrane ;cytosol ;nucleus	C10orf38	4028.11	4571.29	4135.26	4431.1	3929.74	3729.22	4723.15	3533.82	4736.13	4653.46	4577.88	5618.45	4797.04	4820.89	4266.73	4842.64	4928.95	4561.49	2096.83	5756.66	5756.66
1385760	ILMN_24916	ZNF37A	Homo sapiens zinc finger protein 37a (KOX 21) (ZNF37A), transcript variant 1, mRNA.	NM_001007094.1	0.07203	0.10029	1.38452	0.00320061	ZNF37A	0006355;0006350;0046872;0003676;0008270;0003700;0005634	regulation of transcription DNA-dependent ;transcription ;metal ion binding ;nucleic acid binding ;zinc ion binding ;transcription factor activity ;nucleus	ZNF37A	25.8888	24.0773	51.5439	43.5744	42.8987	38.4707	38.4412	36.4564	41.7158	60.505	37.4535	49.9914	54.1231	61.696	38.7098	48.452	39.1082	30.9031	50.1798	60.1059	61.696
1396677	ILMN_11004	PBX4	Homo sapiens pre-B-cell leukemia transcription factor 4 (PBX4), mRNA.	NM_025245.1	0.07323	0.11854	1.60993	0.0032535	PBX4	0006355;0045898;0030902;0009790;0005515;0003700;0005634	regulation of transcription DNA-dependent ;regulation of transcriptional preinitiation complex formation ;hindbrain development ;embryonic development ;protein binding ;transcription factor activity ;nucleus	PBX4	31.5323	26.6556	22.8157	23.2508	52.5278	47.2982	47.7547	47.367	31.5717	59.5584	34.9852	68.3039	54.4445	56.2838	76.7135	78.7156	42.6144	46.9893	42.0778	68.3626	78.7156
1377977	ILMN_8375	SHC1	Homo sapiens SHC (Src homology 2 domain containing) transforming protein 1 (SHC1), transcript variant 1, mRNA.	NM_183001.3	0.05168	0.03286	-1.58137	0.00325727	SHC1	0007176;0045840;0008284;0001558;000187;0007242;0005159;0005158;0005543;0005515;0005068;0005886	regulation of epidermal growth factor receptor activity ;positive regulation of mitosis ;positive regulation of cell proliferation ;regulation of cell growth ;activation of MAPK activity ;intracellular signaling cascade ;insulin-like growth factor receptor binding ;insulin receptor binding ;phospholipid binding ;protein binding ;transmembrane receptor protein tyrosine kinase adaptor protein activ…	SHC1	27.9672	15.8492	31.1532	20.352	17.5645	19.3314	34.4856	29.1194	9.67885	23.0421	27.6344	15.1101	14.8163	9.75686	13.857	15.9644	15.95	51.5436	38.3683	12.2542	51.5436
1384536	ILMN_26715	RELB	Homo sapiens v-rel reticuloendotheliosis viral oncogene homolog B, nuclear factor of kappa light polypeptide gene enhancer in B-cells 3 (avian) (RELB), mRNA.	NM_006509.2	0.10431	0.05295	-1.9809	0.00335448	RELB	0006355;0003714;0005515;0003700;0005634	regulation of transcription DNA-dependent ;transcription corepressor activity ;protein binding ;transcription factor activity ;nucleus	RELB	58.9603	36.2339	48.81	47.8629	67.5031	48.15	36.8675	29.986	33.8635	27.1076	26.2361	25.0368	9.37849	28.4881	28.1418	22.2026	16.8468	48.7259	109.732	49.9581	109.732
1381545	ILMN_3481	WDR4	Homo sapiens WD repeat domain 4 (WDR4), transcript variant 2, mRNA.	NM_033661.3	0.52003	0.66819	1.27783	0.00338115	WDR4	0008033;0005554;0008372	tRNA processing ;molecular function unknown ;cellular component unknown	WDR4	192.798	208.011	303.952	311.782	307.782	268.335	308.574	189.239	322.622	272.416	344.847	270.43	336.217	458.865	353.081	307.111	345.211	264.086	207.896	315.427	458.865
1386166	ILMN_2440	ZNF616	Homo sapiens zinc finger protein 616 (ZNF616), mRNA.	NM_178523.3	0.13401	0.19015	1.41109	0.0034582	ZNF616	0003676;0008270;0005634	nucleic acid binding ;zinc ion binding ;nucleus	ZNF616	67.2346	73.7082	38.0635	72.9945	84.3558	82.6096	61.505	62.7072	103.859	94.8916	89.7387	80.2764	103.365	106.989	75.8104	74.1809	87.488	43.2004	80.0365	89.2473	106.989
1382643	ILMN_29435	RAVER2	Homo sapiens hypothetical protein FLJ10770 (RAVER2), mRNA.	NM_018211.2	0.58057	0.80574	1.38017	0.00346124	RAVER2	000166;0003723;0005634	nucleotide binding ;RNA binding ;nucleus	RAVER2	270.983	215.68	200.552	303.744	356.115	291.114	402.326	297.68	329.172	497.196	278.525	495.113	335.488	411.492	535.458	396.313	353.014	335.797	203.682	417.21	535.458
1381439	ILMN_3808	METTL1	Homo sapiens methyltransferase like 1 (METTL1), transcript variant 2, mRNA.	NM_023032.1	0.0531	0.03568	-1.49665	0.00349967	METTL1	0006400;0008033;0016740;0008176;0008757;0008168;0008372	tRNA modification ;tRNA processing ;transferase activity ;tRNA (guanine-N7-)-methyltransferase activity ;S-adenosylmethionine-dependent methyltransferase activity ;methyltransferase activity ;cellular component unknown	METTL1	17.1817	19.8987	31.0633	23.5331	17.8606	24.8988	23.9174	31.4217	12.8424	16.8697	13.5819	16.0035	29.2243	19.3892	21.3498	11.9737	10.3211	51.937	54.9821	27.3588	54.9821
1388050	ILMN_21791	GC	Homo sapiens group-specific component (vitamin D binding protein) (GC), mRNA.	NM_000583.2	0.03118	0.05526	1.76264	0.00371942	GC	0051180;0005499;0003779;0005386;0005515;0005615	vitamin transport ;vitamin D binding ;actin binding ;carrier activity ;protein binding ;extracellular space	GC	15.0586	13.4149	6.84571	15.6017	16.6057	13.5091	15.5933	16.9239	17.0907	34.8163	17.7951	23.2418	36.349	20.8904	11.5218	46.2405	23.6708	22.4419	32.6258	51.7271	51.7271
1378491	ILMN_7778	SAMSN1	Homo sapiens SAM domain, SH3 domain and nuclear localisation signals, 1 (SAMSN1), mRNA.	NM_022136.3	0.14309	0.07276	-1.97737	0.00378784	SAMSN1	0007018;000166;0003777;0005524;0005871;0005874	microtubule-based movement ;nucleotide binding ;microtubule motor activity ;ATP binding ;kinesin complex ;microtubule	SAMSN1	49.6991	50.4684	84.585	76.2339	113.755	79.0295	37.5037	30.3749	27.4163	42.9456	47.992	32.8745	38.2513	36.4848	35.6927	31.061	44.8515	115.111	83.5485	20.1039	115.111
1393867	ILMN_139201	CAPZB	Homo sapiens capping protein (actin filament) muscle Z-line, beta (CAPZB), mRNA.	NM_004930.1	1.70474	1.4264	-1.20176	0.00380339	CAPZB	0051016;0030036;0006928;0003779;0008290	barbed-end actin filament capping ;actin cytoskeleton organization and biogenesis ;cell motility ;actin binding ;F-actin capping protein complex	CAPZB	813.639	820.223	888.18	791.909	864.735	954.278	893.461	918.357	672.238	825.198	713.301	768.281	706.942	725.186	860.226	830.593	616.721	1130	790.046	717.075	1130
1391164	ILMN_17619	TSNAXIP1	Homo sapiens translin-associated factor X interacting protein 1 (TSNAXIP1), mRNA.	NM_018430.1	0.16958	0.22484	1.31855	0.00384506	TSNAXIP1	5509	calcium ion binding	TSNAXIP1	65.5372	77.7284	103.64	71.636	84.9776	97.1442	94.7572	90.862	98.1253	134.069	108.836	121.663	107.689	81.5826	80.596	120.704	112.483	67.7387	79.4974	100.109	134.069
1392196	ILMN_16201	LOC391356	Homo sapiens similar to CG14903-PA (LOC391356), mRNA.	NM_001013663.1	0.18223	0.23481	1.28142	0.00389335	LOC391356	5634	nucleus	LOC391356	68.61	96.9119	87.2058	101.556	99.8662	91.5658	93.9643	82.2124	117.117	105.825	110.045	110.759	147.474	88.9716	99.3205	103.83	98.0973	71.0258	100.414	131.754	147.474
1394886	ILMN_13527	ABCA2	Homo sapiens ATP-binding cassette, sub-family A (ABC1), member 2 (ABCA2), transcript variant 2, mRNA.	NM_212533.1	0.07886	0.06173	-1.28453	0.00390909	ABCA2	0006810;0006629;0008203;000166;0042626;0016887;0005524;0016021;0043190;0005765	transport ;lipid metabolism ;cholesterol metabolism ;nucleotide binding ;ATPase activity coupled to transmembrane movement of substances ;ATPase activity ;ATP binding ;integral to membrane ;ATP-binding cassette (ABC) transporter complex ;lysosomal membrane	ABCA2	31.8436	37.1069	49.3809	25.4413	42.2626	33.3309	36.8194	43.7744	16.9471	34.1189	31.5825	28.8285	32.7852	30.5409	26.4773	29.0437	35.4412	54.9131	66.9444	48.2687	66.9444
1380185	ILMN_5438	NDST1	Homo sapiens N-deacetylase/N-sulfotransferase (heparan glucosaminyl) 1 (NDST1), mRNA.	NM_001543.3	0.30066	0.40773	1.34864	0.00393226	NDST1	0006412;0015012;0006477;0006476;0003735;0016740;0015016;0016021;0005795;0005622;0005840	protein biosynthesis ;heparan sulfate proteoglycan biosynthesis ;protein amino acid sulfation ;protein amino acid deacetylation ;structural constituent of ribosome ;transferase activity ;[heparan sulfate]-glucosamine N-sulfotransferase activity ;integral to membrane ;Golgi stack ;intracellular ;ribosome	NDST1	198.34	116.407	145.04	109.461	150.38	172.398	171.021	131.255	185.886	200.088	168.985	183.9	210.346	173.174	213.551	263.904	198.376	180.365	91.7314	177.087	263.904
1377602	ILMN_8972	ITIH2	Homo sapiens inter-alpha (globulin) inhibitor H2 (ITIH2), mRNA.	NM_002216.2	0.14596	0.07195	-2.03992	0.0039328	ITIH2	0030212;0004867;0005576	hyaluronan metabolism ;serine-type endopeptidase inhibitor activity ;extracellular region	ITIH2	52.8543	72.0927	80.2569	121.073	65.2139	43.1769	89.5346	38.9727	28.8745	39.5657	39.0543	24.4713	21.0818	20.506	20.8269	20.8855	48.7163	63.2048	102.854	95.5471	121.073
1387149	ILMN_23109	C16orf55	Homo sapiens chromosome 16 open reading frame 55 (C16orf55), mRNA.	NM_153025.1	0.17097	0.27904	1.62311	0.00396434	C16orf55	0006355;0006350;0046872;0003676;0008270;0003700;0005634	regulation of transcription DNA-dependent ;transcription ;metal ion binding ;nucleic acid binding ;zinc ion binding ;transcription factor activity ;nucleus	C16orf55	101.473	59.629	89.3302	46.1967	77.404	123.82	109.921	98.0118	87.5875	160.414	74.5206	161.823	153.431	115.254	102.881	122.309	129.458	81.4356	51.4481	208.698	208.698
1377279	ILMN_9419	PPOX	Homo sapiens protoporphyrinogen oxidase (PPOX), nuclear gene encoding mitochondrial protein, mRNA.	NM_000309.2	0.63637	0.7584	1.18518	0.00404015	PPOX	0006118;0006783;0005489;0004729;0016491;0005739	electron transport ;heme biosynthesis ;electron transporter activity ;protoporphyrinogen oxidase activity ;oxidoreductase activity ;mitochondrion	PPOX	259.717	265.698	281.692	356.07	306.432	384.013	348.955	331.741	394.314	416.758	363.446	294.06	366.372	360.255	391.232	448.241	403.502	314.363	303.673	362.305	448.241
1383551	ILMN_28002	ID1	Homo sapiens inhibitor of DNA binding 1, dominant negative helix-loop-helix protein (ID1), transcript variant 2, mRNA.	NM_181353.1	0.53751	0.3964	-1.3635	0.00411804	ID1	0006357;0007275;0045449;0030528;0005634	regulation of transcription from RNA polymerase II promoter ;development ;regulation of transcription ;transcription regulator activity ;nucleus	ID1	337.088	184.697	194.42	322.934	264.842	233.564	227.223	280.733	150.215	204.03	186.864	170.02	111.407	261.409	190.886	198.08	274.472	322.385	270.827	172.716	337.088
1385364	ILMN_25460	LENG1	Homo sapiens leukocyte receptor cluster (LRC) member 1 (LENG1), mRNA.	NM_024316.1	0.14798	0.11699	-1.27199	0.00415866	LENG1	0004;0005554;0008372	biological process unknown ;molecular function unknown ;cellular component unknown	LENG1	47.6305	64.3005	77.3165	69.5047	81.6326	52.244	70.1596	81.0908	54.8073	53.9192	61.8515	59.0476	68.1206	61.818	47.0955	39.3352	56.5769	90.7349	104.222	66.0523	104.222
1386577	ILMN_23866	FOXRED1	Homo sapiens FAD-dependent oxidoreductase domain containing 1 (FOXRED1), mRNA.	NM_017547.2	1.90881	2.42769	1.26482	0.0041818	FOXRED1	0006118;0016491;0005515	electron transport ;oxidoreductase activity ;protein binding	FOXRED1	1064.56	806.164	792.987	975.181	989.643	1065.77	1050.8	1290.84	1018.53	1401.77	1069.5	1183.92	1302.44	1387.33	1130.13	1310.53	1487.6	1047.82	912.703	1588.76	1588.76
1396054	ILMN_11875	FOLR2	Homo sapiens folate receptor 2 (fetal) (FOLR2), mRNA.	NM_000803.2	0.15105	0.06188	-2.45442	0.00430148	FOLR2	0015884;0005542;0004872;0005624;0016020	folic acid transport ;folic acid binding ;receptor activity ;membrane fraction ;membrane	FOLR2	21.7981	69.8978	60.6795	84.2559	70.8331	83.8131	87.9374	29.4334	26.6573	51.9465	27.3456	15.9834	34.6951	38.4585	47.4664	7.44275	28.6529	158.954	83.8311	23.4806	158.954
1384166	ILMN_2707	TSEN2	Homo sapiens tRNA splicing endonuclease 2 homolog (S. cerevisiae) (TSEN2), mRNA.	NM_025265.2	0.71155	0.93554	1.30755	0.00441024	TSEN2	0006397;0006388;000213;0004519;0016787;000214	mRNA processing ;tRNA splicing ;tRNA-intron endonuclease activity ;endonuclease activity ;hydrolase activity ;tRNA-intron endonuclease complex	TSEN2	326.574	453.829	476.871	444.497	386.269	395.336	399.3	267.457	564.463	434.817	477.113	502.267	520.655	537.517	406.503	450.015	478.668	212.405	236.373	384.878	564.463
1383292	ILMN_2831	IL17F	Homo sapiens interleukin 17F (IL17F), mRNA.	NM_052872.3	0.06464	0.04372	-1.48686	0.00453925	IL17F	0045423;0016525;0017015;0006029;0045414;0051216;0006954;0045408;0045076;0042109;0005125;0019955;0042803;005615	regulation of granulocyte macrophage colony-stimulating factor biosynthesis ;negative regulation of angiogenesis ;regulation of transforming growth factor beta receptor signaling pathway ;proteoglycan metabolism ;regulation of interleukin-8 biosynthesis ;cartilage development ;inflammatory response ;regulation of interleukin-6 biosynthesis ;regulation of interleukin-2 biosynthesis ;tumor necrosis…	IL17F	37.9474	20.1612	34.4415	19.0895	37.9065	17.08	32.6471	47.7603	11.627	29.4244	18.7805	23.7142	24.145	19.3866	20.9175	23.6024	11.9831	55.6305	49.6392	42.5997	55.6305
1394251	ILMN_138249	CDC14B	Homo sapiens CDC14 cell division cycle 14 homolog B (S. cerevisiae) (CDC14B), transcript variant 3, mRNA.	NM_033332.1	0.09389	0.14335	1.51824	0.0045756	CDC14B	0006470;0008138;0016787;0004722;0004725;0005634	protein amino acid dephosphorylation ;protein tyrosine/serine/threonine phosphatase activity ;hydrolase activity ;protein serine/threonine phosphatase activity ;protein tyrosine phosphatase activity ;nucleus	CDC14B	64.2921	42.8062	29.8847	43.5812	37.1266	35.3109	46.8598	42.6218	57.4858	63.2481	45.361	66.9572	72.4129	61.6606	50.4958	104.146	67.898	89.5084	53.9769	93.2136	104.146
1389424	ILMN_19997	MRAS	Homo sapiens muscle RAS oncogene homolog (MRAS), mRNA.	NM_012219.2	0.43649	0.65453	1.49126	0.00463188	MRAS	0006886;0007275;0007517;0030036;0007265;000166;0003924;0030742;0005525;0005886	intracellular protein transport ;development ;muscle development ;actin cytoskeleton organization and biogenesis ;Ras protein signal transduction ;nucleotide binding ;GTPase activity ;GTP-dependent protein binding ;GTP binding ;plasma membrane	MRAS	247.664	236.457	192.275	231.146	259.7	254.309	289.081	146.631	262.038	395.186	209.53	377.564	509.828	276.261	265.987	270.455	341.123	171.593	119.749	335.762	509.828
1378132	ILMN_8368	ZNF42	Homo sapiens zinc finger protein 42 (myeloid-specific retinoic acid-responsive) (ZNF42), transcript variant 2, mRNA.	NM_198055.1	1.05769	1.31206	1.23366	0.00464981	ZNF42	0006355;0006350;0046872;0008270;0005515;0003700;0005634	regulation of transcription DNA-dependent ;transcription ;metal ion binding ;zinc ion binding ;protein binding ;transcription factor activity ;nucleus	ZNF42	483.922	424.328	511.619	532.892	502.343	645.318	651.873	562.445	561.755	755.786	546.415	679.137	855.991	739.827	573.801	674.53	693.52	595.109	469.019	732.369	855.991
1384140	ILMN_27252	RGS10	Homo sapiens regulator of G-protein signalling 10 (RGS10), transcript variant 2, mRNA.	NM_002925.3	0.52812	0.31045	-1.71057	0.00472957	RGS10	0009968;0004871	negative regulation of signal transduction ;signal transducer activity	RGS10	85.97	243.276	377.337	283.755	259.08	243.694	243.037	340.26	156.353	257.176	234.356	69.3932	125.841	224.97	191.475	41.7557	145.605	274.826	243.701	65.0831	377.337
1379324	ILMN_6711	KLHDC3	Homo sapiens kelch domain containing 3 (KLHDC3), mRNA.	NM_057161.2	9.40643	11.2064	1.18479	0.00490975	KLHDC3	0007131;0005515;0003682;000790;0005737	meiotic recombination ;protein binding ;chromatin binding ;nuclear chromatin ;cytoplasm	KLHDC3	6229.98	5622.51	5422.47	4975.76	5336.47	5479.11	6253.48	7080.24	5713.7	6524.35	5536.51	5710.88	7386.04	6716.78	5921.48	8259.38	6299.59	5594.15	3634.9	6809.06	8259.38
1389806	ILMN_19429	KLK1	Homo sapiens kallikrein 1, renal/pancreas/salivary (KLK1), mRNA.	NM_002257.2	0.0637	0.04229	-1.51471	0.00499692	KLK1	0006508;0008233;0004293;0008372	proteolysis and peptidolysis ;peptidase activity ;tissue kallikrein activity ;cellular component unknown	KLK1	30.9084	35.1005	24.9391	42.1196	24.88	21.2473	29.6143	42.8	15.4285	29.6132	20.4968	24.5855	25.4077	35.8849	8.48975	15.2415	16.6174	42.6481	50.4654	18.4598	50.4654
1393445	ILMN_1434	ARPC2	Homo sapiens actin related protein 2/3 complex, subunit 2, 34kDa (ARPC2), transcript variant 2, mRNA.	NM_005731.2	4.98903	4.2167	-1.18972	0.00504844	ARPC2	0030833;0006928;0005200;0005856;0005885	regulation of actin filament polymerization ;cell motility ;structural constituent of cytoskeleton ;cytoskeleton ;Arp2/3 protein complex	ARPC2	2713.75	3433.95	3011.28	3148.58	2714.52	2265.13	2497.45	2409.83	2558.93	2046.45	2350.88	1990.89	1928.21	2389.73	2544.66	2187.94	2153.06	2536.41	3009.49	2793.41	3433.95
1395612	ILMN_12580	IFT172	Homo sapiens intraflagellar transport 172 homolog (Chlamydomonas) (IFT172), mRNA.	NM_015662.1	0.37936	0.54128	1.41895	0.00513172	IFT172	0015671;0020037;0005488	oxygen transport ;heme binding ;binding	IFT172	132.559	169.459	185.432	183.28	184.765	301.578	267.463	188.481	216.83	335.669	187.048	322.092	256.234	266.938	241.535	313.195	308.101	135.974	114.176	214.877	335.669
1380668	ILMN_4776	THRA	Homo sapiens thyroid hormone receptor, alpha (erythroblastic leukemia viral (v-erb-a) oncogene homolog, avian) (THRA), transcript variant 1, mRNA.	NM_199334.2	0.55029	0.70631	1.27644	0.00517201	THRA	0006355;0006366;0046872;0003707;0008270;0005515;0003700;0004887;0005634	regulation of transcription DNA-dependent ;transcription from RNA polymerase II promoter ;metal ion binding ;steroid hormone receptor activity ;zinc ion binding ;protein binding ;transcription factor activity ;thyroid hormone receptor activity ;nucleus	THRA	302.415	271.871	346.53	311.247	235.597	265.202	339.18	235.974	314.482	309.015	350.465	392.767	314.948	317.591	454.355	325.702	459.283	210.728	203.834	294.904	459.283
1393152	ILMN_14845	ACBD4	Homo sapiens acyl-Coenzyme A binding domain containing 4 (ACBD4), mRNA.	NM_024722.1	0.12139	0.18187	1.49005	0.00550332	ACBD4	62	acyl-CoA binding	ACBD4	38.4185	39.1641	42.1673	39.964	68.6044	93.2755	83.4645	65.0374	60.7707	86.3607	57.3712	95.3552	69.8075	86.3696	75.8549	115.529	84.4818	59.1373	88.8004	127.58	127.58
1380242	ILMN_5295	FTCD	Homo sapiens formiminotransferase cyclodeaminase (FTCD), transcript variant B, mRNA.	NM_006657.2	0.06655	0.12943	1.93412	0.00556925	FTCD	0006547;0008152;0006760;0016829;0005542;0016740;0030409;0030412;0005737	histidine metabolism ;metabolism ;folic acid and derivative metabolism ;lyase activity ;folic acid binding ;transferase activity ;glutamate formimidoyltransferase activity ;formimidoyltetrahydrofolate cyclodeaminase activity ;cytoplasm	FTCD	16.7578	8.41591	12.9006	31.9805	45.2424	76.2264	64.4266	35.6561	58.6319	47.2865	33.944	62.7087	54.7056	85.4594	48.5469	87.6049	56.8786	15.9227	31.9601	87.3912	87.6049
1394975	ILMN_1343	C3orf37	Homo sapiens chromosome 3 open reading frame 37 (C3orf37), transcript variant 2, mRNA.	NM_020187.2	0.70126	0.86951	1.2331	0.00557189	C3orf37	0006810;0008289;0005737	transport ;lipid binding ;cytoplasm	C3orf37	387.257	404.141	325.588	387.511	405.841	377.65	355.359	334.505	389.338	403.091	426.122	333.849	569.475	452.043	447.715	457.925	496.551	327.563	223.139	420.129	569.475
1379542	ILMN_6357	MAGEA4	Homo sapiens melanoma antigen family A, 4 (MAGEA4), transcript variant 4, mRNA.	NM_001011550.1	0.05244	0.0694	1.31594	0.00566574	MAGEA4	0004;0005554;0008372	biological process unknown ;molecular function unknown ;cellular component unknown	MAGEA4	19.5408	20.9018	21.7295	16.3648	26.4875	31.3635	30.3748	34.7814	25.8283	45.5997	30.0911	31.7822	23.4125	39.0073	31.4931	32.0372	32.4962	45.0474	43.1192	58.8846	58.8846
1390899	ILMN_17912	LOC196549	Homo sapiens similar to hypothetical protein FLJ20897 (LOC196549), mRNA.	NM_145293.2	0.05784	0.11185	1.92319	0.00567607	LOC196549	0006486;0051084;0003824;0016757;0003980;0051082;0005783;0005793	protein amino acid glycosylation ;posttranslational protein folding ;catalytic activity ;transferase activity transferring glycosyl groups ;UDP-glucose:glycoprotein glucosyltransferase activity ;unfolded protein binding ;endoplasmic reticulum ;ER-Golgi intermediate compartment	LOC196549	26.8283	22.6543	16.011	18.8649	52.5186	33.2283	56.1628	27.0952	32.329	53.0031	32.7199	70.6074	57.1907	63.1046	40.0401	95.7224	49.3219	19.6301	24.384	46.5325	95.7224
1379992	ILMN_5835	KIAA0133	Homo sapiens KIAA0133 (KIAA0133), mRNA.	NM_014777.1	0.10898	0.15675	1.43044	0.00581795	KIAA0133	16021	integral to membrane	KIAA0133	52.3828	60.0463	59.0925	49.1826	59.3401	49.7239	51.1031	31.2935	60.8625	49.528	57.782	61.2672	93.4671	83.0012	61.7865	99.5385	69.9792	77.504	66.5051	105.939	105.939
1388211	ILMN_21581	RIMS3	Homo sapiens regulating synaptic membrane exocytosis 3 (RIMS3), mRNA.	NM_014747.2	14.4076	18.2168	1.25742	0.00585165	RIMS3	0006836;0006887;0045202	neurotransmitter transport ;exocytosis ;synapse	RIMS3	11485.7	10016.6	9601.27	8785.91	7730.48	9002.31	9975.51	11402.3	8355.88	11477.2	8950.72	9446.59	12112.6	10607.8	10778.7	13065	10662.8	5456.64	4695.33	13110.5	13110.5
1385516	ILMN_25223	ABCC5	Homo sapiens ATP-binding cassette, sub-family C (CFTR/MRP), member 5 (ABCC5), transcript variant 1, mRNA.	NM_005688.2	1.64597	2.21788	1.34003	0.00589215	ABCC5	0006810;000166;0042626;0016887;0015239;0008514;0005524;0005624;0016021;0005887	transport ;nucleotide binding ;ATPase activity coupled to transmembrane movement of substances ;ATPase activity ;multidrug transporter activity ;organic anion transporter activity ;ATP binding ;membrane fraction ;integral to membrane ;integral to plasma membrane	ABCC5	797.383	780.326	780.042	807.207	1021.45	1128.96	984.158	1032.04	938.506	1377.63	860.636	1256.1	1631.72	1017.82	899.687	1309.84	1253.87	769.467	521.293	1204.52	1631.72
1390238	ILMN_18926	CDKN2C	Homo sapiens cyclin-dependent kinase inhibitor 2C (p18, inhibits CDK4) (CDKN2C), transcript variant 1, mRNA.	NM_001262.2	0.06317	0.08607	1.35514	0.00592273	CDKN2C	0007050;0008285;0007049;0004861;0005737;0005634	cell cycle arrest ;negative regulation of cell proliferation ;cell cycle ;cyclin-dependent protein kinase inhibitor activity ;cytoplasm ;nucleus	CDKN2C	32.9209	24.6296	20.4967	27.8233	28.5966	36.2226	23.5597	39.0504	32.5797	38.7155	40.9639	54.39	39.7508	44.5916	49.0753	36.1876	36.4144	63.7058	46.4818	53.1128	63.7058
1378928	ILMN_7282	CTHRC1	Homo sapiens collagen triple helix repeat containing 1 (CTHRC1), mRNA.	NM_138455.2	0.39133	0.22868	-1.72075	0.00600495	CTHRC1	0006817;0005198;0005578;0005737	phosphate transport ;structural molecule activity ;extracellular matrix (sensu Metazoa) ;cytoplasm	CTHRC1	199.457	145.152	230.442	276.23	225.945	117.029	168.199	136.682	187.941	59.5852	207.177	88.856	127.712	81.8137	97.2035	74.4774	93.1056	114.922	291.973	88.5852	291.973
1382882	ILMN_29103	DDX48	Homo sapiens DEAD (Asp-Glu-Ala-Asp) box polypeptide 48 (DDX48), mRNA.	NM_014740.2	2.1167	1.75354	-1.2138	0.00601132	DDX48	0006364;000166;0003723;0016787;0005515;0005524;0008026;0003677;0005634	rRNA processing ;nucleotide binding ;RNA binding ;hydrolase activity ;protein binding ;ATP binding ;ATP-dependent helicase activity ;DNA binding ;nucleus	DDX48	1369.61	1267.36	1199.74	1051.92	1293.26	1046.76	1075.02	851.886	1113.71	808.57	1096.93	1071.19	879.014	988.81	894.794	745.223	911.453	848.45	1198.91	749.329	1369.61
1392707	ILMN_15349	ST6GAL1	Homo sapiens ST6 beta-galactosamide alpha-2,6-sialyltranferase 1 (ST6GAL1), transcript variant 3, mRNA.	NM_173217.1	1.83138	1.38586	-1.3288	0.00615298	ST6GAL1	0040007;0006486;0006959;0009311;0007275;0003835;0030173;0016021;0005795	growth ;protein amino acid glycosylation ;humoral immune response ;oligosaccharide metabolism ;development ;beta-galactoside alpha-26-sialyltransferase activity ;integral to Golgi membrane ;integral to membrane ;Golgi stack	ST6GAL1	817.006	824.245	1287.15	997.616	1168.96	1322.82	849.77	731.49	860.551	734.585	851.91	555.497	715.167	877.343	698.478	430.845	740.569	765.711	834.585	758.922	1322.82
1391467	ILMN_17168	GGA2	Homo sapiens golgi associated, gamma adaptin ear containing, ARF binding protein 2 (GGA2), mRNA.	NM_015044.3	0.62515	0.7781	1.2378	0.00625473	GGA2	0006891;0006886;0006461;0030306;0008565;0005515;0030130;0016020;0005795;0005802	intra-Golgi transport ;intracellular protein transport ;protein complex assembly ;ADP-ribosylation factor binding ;protein transporter activity ;protein binding ;clathrin coat of trans-Golgi network vesicle ;membrane ;Golgi stack ;Golgi trans face	GGA2	373.338	336.268	348.141	359.239	340.399	327.774	356.137	194.694	299.11	440.971	361.913	426.587	424.201	373.183	333.032	427.291	425.787	248.056	245.158	388.879	440.971
1380574	ILMN_4871	HYPB	Homo sapiens huntingtin interacting protein B (HYPB), transcript variant 2, mRNA.	NM_012271.1	0.91579	1.05374	1.14429	0.00637169	HYPB	0008152;0016491;0005506	metabolism ;oxidoreductase activity ;iron ion binding	HYPB	514.892	396.358	447.763	480.581	493.881	512.732	503.061	426.607	588.558	525.586	464.961	579.495	554.263	541.758	443.749	653.242	548.727	424.169	442.39	491.458	653.242
1395631	ILMN_12390	SOX30	Homo sapiens SRY (sex determining region Y)-box 30 (SOX30), transcript variant 1, mRNA.	NM_178424.1	0.14999	0.11165	-1.35086	0.0064571	SOX30	0007283;0006350;0006357;0003702;0003677;0005634	spermatogenesis ;transcription ;regulation of transcription from RNA polymerase II promoter ;RNA polymerase II transcription factor activity ;DNA binding ;nucleus	SOX30	88.0774	66.7375	59.6373	48.6932	55.6867	59.3644	67.6889	90.4565	56.7128	68.4576	51.9806	38.6181	63.3334	54.7638	54.3715	55.4507	46.0517	105.295	98.5998	49.7215	105.295
1391821	ILMN_16785	AK1	Homo sapiens adenylate kinase 1 (AK1), mRNA.	NM_000476.1	1.07788	1.46608	1.35265	0.0065715	AK1	0006139;0046034;0004017;0016740;000166;0016301;0005524;0005829;0005737	nucleobase nucleoside nucleotide and nucleic acid metabolism ;ATP metabolism ;adenylate kinase activity ;transferase activity ;nucleotide binding ;kinase activity ;ATP binding ;cytosol ;cytoplasm	AK1	563.891	500.957	382.086	507.62	668.535	582.413	489.785	568.455	670.774	829.493	631.805	803.554	889.754	753.026	633.446	881.456	588.991	868.112	355.114	956.413	956.413
1388618	ILMN_21069	HS3ST3A1	Homo sapiens heparan sulfate (glucosamine) 3-O-sulfotransferase 3A1 (HS3ST3A1), mRNA.	NM_006042.1	0.10291	0.06854	-1.50976	0.00657994	HS3ST3A1	0016740;0008146;0016021;0005795	transferase activity ;sulfotransferase activity ;integral to membrane ;Golgi stack	HS3ST3A1	53.1103	38.0916	35.4536	37.0637	70.3245	40.8456	67.5034	44.4846	21.3645	42.6567	39.9563	39.5118	31.0048	42.9795	35.1537	21.8957	17.3485	79.233	66.0238	53.0479	79.233
1381248	ILMN_4012	ABCC8	Homo sapiens ATP-binding cassette, sub-family C (CFTR/MRP), member 8 (ABCC8), mRNA.	NM_000352.2	1.11427	1.53326	1.36843	0.00659278	ABCC8	0006813;0006810;0005975;000166;0042626;0004872;0016887;0008281;0015079;0005524;0016021;00016020	potassium ion transport ;transport ;carbohydrate metabolism ;nucleotide binding ;ATPase activity coupled to transmembrane movement of substances ;receptor activity ;ATPase activity ;sulfonylurea receptor activity ;potassium ion transporter activity ;ATP binding ;integral to membrane ;membrane	ABCC8	499.926	425.156	475.664	464.265	685.407	557.342	863.371	646.547	487.966	874.326	535.425	791.432	771.343	980.778	721.824	1005.68	1001.43	594.227	486.127	835.645	1005.68
1383398	ILMN_28237	JMJD1B	Homo sapiens jumonji domain containing 1B (JMJD1B), mRNA.	NM_016604.3	1.29761	1.52464	1.16849	0.00662418	JMJD1B	5634	nucleus	JMJD1B	674.317	702.667	527.538	673.767	768.154	731.468	772.9	611.22	714.059	831.574	657.098	847.228	957.752	803.976	879.823	821.61	785.415	707.592	530.058	700.814	957.752
1377391	ILMN_9339	SLC16A5	Homo sapiens solute carrier family 16 (monocarboxylic acid transporters), member 5 (SLC16A5), mRNA.	NM_004695.2	0.03591	0.01623	-2.22575	0.00666251	SLC16A5	0015718;0006810;0015711;0015355;0005215;0015293;0005624;0005887	monocarboxylic acid transport ;transport ;organic anion transport ;monocarboxylate porter activity ;transporter activity ;symporter activity ;membrane fraction ;integral to plasma membrane	SLC16A5	15.2628	17.2228	13.0779	14.2529	13.901	20.3059	4.84282	6.46981	6.47045	0.75955	13.24	10.0891	-1.66519	11.7113	10.2696	-3.44161	6.59518	40.68	51.6538	2.04745	51.6538
1377715	ILMN_8915	FLJ25037	Homo sapiens hypothetical protein FLJ25037 (FLJ25037), mRNA.	NM_182596.1	0.23871	0.34659	1.44391	0.00666414	FLJ25037	0007076;0005488	mitotic chromosome condensation ;binding	FLJ25037	94.0808	55.9984	118.571	98.9596	146.141	113.618	139.23	208.283	156.033	200.497	110.07	163.016	139.399	150.072	148.638	186.712	202.623	90.3472	104.244	199.293	208.283
1392931	ILMN_15220	INPP5F	Homo sapiens inositol polyphosphate-5-phosphatase F (INPP5F), transcript variant 1, mRNA.	NM_014937.2	0.05235	0.03439	-1.53066	0.00677154	INPP5F	0030041;0030032;0035025;0007264;0031529;0048261;000166;0005515;0003924;005525	actin filament polymerization ;lamellipodium biogenesis ;positive regulation of Rho protein signal transduction ;small GTPase mediated signal transduction ;ruffle organization and biogenesis ;negative regulation of receptor mediated endocytosis ;nucleotide binding ;protein binding ;GTPase activity ;GTP binding	INPP5F	20.006	24.1256	28.337	26.9744	31.9753	23.7973	21.8076	28.4268	14.3223	9.25512	16.2148	20.2441	10.7485	26.8143	20.6306	5.71375	17.7747	53.932	23.6898	24.4159	53.932
1376868	ILMN_9977	FLJ20859	Homo sapiens FLJ20859 gene (FLJ20859), transcript variant 2, mRNA.	NM_022734.2	0.38619	0.50403	1.29794	0.00677642	FLJ20859	16021	integral to membrane	FLJ20859	185.567	153.015	218.54	175.132	239.685	215.784	198.086	130.049	213.093	268.355	226.597	368.127	188.519	279.961	187.418	247.54	277.148	160.269	203.925	214.879	368.127
1396955	ILMN_10718	EIF4A1	Homo sapiens eukaryotic translation initiation factor 4A, isoform 1 (EIF4A1), mRNA.	NM_001416.1	9.62001	7.71345	-1.25409	0.00685196	EIF4A1	0006412;000166;0003676;0003723;0016787;0005515;0005524;0003743;0008026;0003677	protein biosynthesis ;nucleotide binding ;nucleic acid binding ;RNA binding ;hydrolase activity ;protein binding ;ATP binding ;translation initiation factor activity ;ATP-dependent helicase activity ;DNA binding	EIF4A1	6692.59	5560.15	5692.38	4736.75	6443.16	6136.74	4628.77	4124.2	4082.22	4766.12	4230.87	5125.87	4180.52	3959.5	4588.62	4979.16	3831.97	5560.85	7346.82	3951.89	7346.82
1390424	ILMN_18537	PAWR	Homo sapiens PRKC, apoptosis, WT1, regulator (PAWR), mRNA.	NM_002583.2	0.08103	0.05899	-1.38135	0.00710835	PAWR	0006915;0006355;0043065;0006350;0019899;0005737;0005634	apoptosis ;regulation of transcription DNA-dependent ;positive regulation of apoptosis ;transcription ;enzyme binding ;cytoplasm ;nucleus	PAWR	37.236	31.5839	38.1864	35.6281	42.3236	30.0273	36.3098	38.3788	15.8948	49.532	22.177	32.1338	29.4943	31.9962	20.916	26.0175	22.9617	72.812	70.347	50.2634	72.812
1393783	ILMN_139392	ZNF491	Homo sapiens zinc finger protein 491 (ZNF491), mRNA.	NM_152356.2	0.14023	0.18443	1.30798	0.00749961	ZNF491	0006355;0006350;0046872;0008270;0003677;0005634	regulation of transcription DNA-dependent ;transcription ;metal ion binding ;zinc ion binding ;DNA binding ;nucleus	ZNF491	50.3868	64.3585	35.3668	60.3207	84.4398	65.8925	58.7142	98.8253	64.0808	91.522	77.609	88.6549	70.4083	87.08	76.4738	94.377	106.167	91.9507	88.8374	118.782	118.782
1393377	ILMN_14476	ZNF514	Homo sapiens zinc finger protein 514 (ZNF514), mRNA.	NM_032788.1	0.16571	0.23887	1.43356	0.00767406	ZNF514	0006355;0006350;0046872;0008270;0003677;0005634	regulation of transcription DNA-dependent ;transcription ;metal ion binding ;zinc ion binding ;DNA binding ;nucleus	ZNF514	51.4268	52.8399	96.6925	87.587	68.8588	101.346	114.727	101.091	109.04	131.592	100.272	125.641	105.951	96.6859	100.47	134.384	125.066	112.297	21.316	103.792	134.384
1378128	ILMN_8361	COLQ	Homo sapiens collagen-like tail subunit (single strand of homotrimer) of asymmetric acetylcholinesterase (COLQ), transcript variant II, mRNA.	NM_080538.1	0.05283	0.03879	-1.3695	0.00770527	COLQ	0008105;0006817;0001507;0042135;0005605;0005615;0045202;0005737	asymmetric protein localization ;phosphate transport ;acetylcholine catabolism in synaptic cleft ;neurotransmitter catabolism ;basal lamina ;extracellular space ;synapse ;cytoplasm	COLQ	20.8533	24.949	19.4976	23.7615	22.2149	20.4402	27.9996	34.8596	14.724	15.6868	11.6033	18.8917	21.6889	30.3716	16.7659	28.0508	13.7719	48.5412	50.8406	23.6167	50.8406
1395281	ILMN_13003	BTBD7	Homo sapiens BTB (POZ) domain containing 7 (BTBD7), transcript variant 1, mRNA.	NM_001002860.2	0.38326	0.48184	1.2503	0.00772508	BTBD7	5515	protein binding	BTBD7	207.209	150.096	147.01	175.97	184.896	196.185	173.415	230.526	197.35	307.798	177.415	260.41	224.097	254.645	184.955	252.101	248.949	230.537	167.576	241.473	307.798
1391833	ILMN_16804	FBP1	Homo sapiens fructose-1,6-bisphosphatase 1 (FBP1), mRNA.	NM_000507.2	0.06155	0.02325	-2.66227	0.00778009	FBP1	0006094;0005975;0006000;0042132;0042802;0004331;0016787;0008270;0042578	gluconeogenesis ;carbohydrate metabolism ;fructose metabolism ;fructose-bisphosphatase activity ;protein self binding ;fructose-26-bisphosphate 2-phosphatase activity ;hydrolase activity ;zinc ion binding ;phosphoric ester hydrolase activity	FBP1	9.055	46.8954	26.0848	31.9516	25.287	51.5543	11.9774	5.85233	9.44528	7.57985	19.0877	6.01404	14.4537	17.202	1.45622	8.12353	17.6844	63.1117	50.6003	-7.5292	63.1117
1385473	ILMN_2540	C11orf46	Homo sapiens chromosome 11 open reading frame 46 (C11orf46), mRNA.	NM_152316.1	1.24468	1.57824	1.261	0.00800655	C11orf46	000166;0005524	nucleotide binding ;ATP binding	C11orf46	719.222	878.699	689.868	746.642	558.388	562.164	664.201	611.568	942.736	740.404	975.842	590.153	679.804	1092.23	843.148	876.502	884.067	498.098	509.186	658.419	1092.23
1383605	ILMN_27838	RAB30	Homo sapiens RAB30, member RAS oncogene family (RAB30), mRNA.	NM_014488.3	0.15618	0.21232	1.35197	0.00804069	RAB30	0007264;0015031;000166;0003924;0005525;0005795	small GTPase mediated signal transduction ;protein transport ;nucleotide binding ;GTPase activity ;GTP binding ;Golgi stack	RAB30	73.2561	78.5802	57.5381	73.22	56.5851	83.5651	59.2691	96.1516	93.6866	96.476	81.8613	77.0559	107.684	98.4202	110.093	117.257	67.4094	114.034	77.6772	148.677	148.677
1385263	ILMN_25762	GAPVD1	Homo sapiens GTPase activating protein and VPS9 domains 1 (GAPVD1), mRNA.	NM_015635.2	2.10454	2.36282	1.11654	0.00837424	GAPVD1	0008152;0005975;0005489;0004022;0016491;0005634	metabolism ;carbohydrate metabolism ;electron transporter activity ;alcohol dehydrogenase activity ;oxidoreductase activity ;nucleus	GAPVD1	1301.49	1162.94	955.789	1216.76	1146.09	1210.33	1046.25	1057.13	1316.43	1133.51	1184.35	1381.42	1387.66	1336.31	1232.23	1316.9	1235.86	1141.46	906.521	1062.36	1387.66
1381193	ILMN_4156	MRPL43	Homo sapiens mitochondrial ribosomal protein L43 (MRPL43), nuclear gene encoding mitochondrial protein, transcript variant 1, mRNA.	NM_032112.2	1.25787	1.48631	1.1751	0.00849091	MRPL43	0003735;0005739;0030529	structural constituent of ribosome ;mitochondrion ;ribonucleoprotein complex	MRPL43	651.855	637.865	713.25	568.468	570.964	913.414	749.638	610.958	748.213	786.264	855.027	768.735	767.618	818.397	817.063	729.626	758.124	508.156	555.823	724.794	913.414
1378438	ILMN_7917	CPAMD8	Homo sapiens C3 and PZP-like, alpha-2-macroglobulin domain containing 8 (CPAMD8), mRNA.	NM_015692.1	0.04867	0.06925	1.41495	0.00852221	CPAMD8	4866	endopeptidase inhibitor activity	CPAMD8	27.1364	17.0114	18.3709	34.1605	34.4022	18.3066	21.0333	28.0196	18.7037	51.8717	25.809	34.7002	38.2095	41.7825	31.3469	30.6537	25.6304	26.6631	37.9154	51.0791	51.8717
1387088	ILMN_23038	ATPAF2	Homo sapiens ATP synthase mitochondrial F1 complex assembly factor 2 (ATPAF2), nuclear gene encoding mitochondrial protein, mRNA.	NM_145691.3	0.12498	0.19793	1.57489	0.00862567	ATPAF2	0007165;0007186;0007600;0050909;0007635;0004872;0004930;0008527;00016021	signal transduction ;G-protein coupled receptor protein signaling pathway ;sensory perception ;perception of taste ;chemosensory behavior ;receptor activity ;G-protein coupled receptor activity ;taste receptor activity ;integral to membrane	ATPAF2	33.4049	44.745	38.4326	59.788	76.3066	60.0222	72.2407	83.893	56.3272	113.943	40.9366	85.8573	104.288	153.586	88.7756	69.9855	95.4264	100.717	63.0341	129.421	153.586
1380811	ILMN_4536	STX16	Homo sapiens syntaxin 16 (STX16), transcript variant 2, mRNA.	NM_003763.3	3.93354	4.66759	1.18007	0.00865056	STX16	0006891;0006886;0005486;0008565;0016020;0005792;0016021;0005795	intra-Golgi transport ;intracellular protein transport ;t-SNARE activity ;protein transporter activity ;membrane ;microsome ;integral to membrane ;Golgi stack	STX16	2086.27	1612.19	1781.48	2109.91	2341.09	2406.6	2091.48	2672.26	2640.7	2415.61	2210.61	2638.12	2944.72	2810.26	2125.78	2372.64	2820.44	2167.38	2168.87	2512.15	2944.72
1381073	ILMN_4218	PRKAB2	Homo sapiens protein kinase, AMP-activated, beta 2 non-catalytic subunit (PRKAB2), mRNA.	NM_005399.3	0.75428	0.55824	-1.35867	0.00867682	PRKAB2	0006633;0007165	fatty acid biosynthesis ;signal transduction	PRKAB2	370.663	264.238	502.204	385.727	357.774	332.403	269.697	515.968	356.61	206.939	306.364	262.856	290.294	259.612	263.315	239.535	257.569	287.478	473.833	304.855	515.968
1394885	ILMN_13525	TXNL2	Homo sapiens thioredoxin-like 2 (TXNL2), mRNA.	NM_006541.1	0.04851	0.08983	1.84173	0.00868109	TXNL2	0006118;0045454;0005489;0005515	electron transport ;cell redox homeostasis ;electron transporter activity ;protein binding	TXNL2	16.6954	9.7179	20.0217	23.4495	18.2615	45.0259	40.7829	47.9597	36.6437	44.1328	9.4616	60.2698	44.838	34.634	40.3313	53.1771	37.3731	23.5177	0.19657	82.6696	82.6696
1382881	ILMN_29102	EVL	Homo sapiens Enah/Vasp-like (EVL), mRNA.	NM_016337.2	15.7458	18.7068	1.1815	0.00884115	EVL	0030048;0051016;0007411;0045010;0007399;0030168;0007166;0007015;0008154;0005522;0017124;0030027;0005925;005737	actin filament-based movement ;barbed-end actin filament capping ;axon guidance ;actin nucleation ;neurogenesis ;platelet activation ;cell surface receptor linked signal transduction ;actin filament organization ;actin polymerization and/or depolymerization ;profilin binding ;SH3 domain binding ;lamellipodium ;focal adhesion ;cytoplasm	EVL	10412.1	8672.23	8441.58	9053.13	9390.08	8957.94	11381.4	10786.3	9649.92	11292.7	8380.86	10205.1	11395.4	10956.9	10326.4	14090.3	10774.9	11720.3	8668.73	14521.3	14521.3
1385988	ILMN_24580	DPP10	Homo sapiens dipeptidyl-peptidase 10 (DPP10), transcript variant 1, mRNA.	NM_020868.2	0.34085	0.55589	1.62188	0.0089021	DPP10	0006508;0003824;0004274;0005624;0016020;0016021	proteolysis and peptidolysis ;catalytic activity ;dipeptidyl-peptidase IV activity ;membrane fraction ;membrane ;integral to membrane	DPP10	142.812	130.986	251.13	217.181	236.466	234.518	254.199	110.015	351.592	179.287	279.911	260.295	230.821	346.961	215.925	278.793	427.554	45.8072	53.0438	186.754	427.554
1393184	ILMN_14667	SNRPB	Homo sapiens small nuclear ribonucleoprotein polypeptides B and B1 (SNRPB), transcript variant 2, mRNA.	NM_003091.3	1.83155	1.46282	-1.25901	0.00890905	SNRPB	0006397;0008380;0005515;0003723;0005732;0005681;0030532;0005634	mRNA processing ;RNA splicing ;protein binding ;RNA binding ;small nucleolar ribonucleoprotein complex ;spliceosome complex ;small nuclear ribonucleoprotein complex ;nucleus	SNRPB	1168.37	1120.56	978.426	1097.34	1024.35	917.121	804.195	618.413	956.512	623.976	816.799	765.442	850.508	663.391	789.174	723.347	781.541	706.23	1173.27	689.301	1173.27
1382764	ILMN_29163	ADAMTSL5	Homo sapiens ADAMTS-like 5 (ADAMTSL5), mRNA.	NM_213604.1	0.02845	0.04947	1.72907	0.00891601	ADAMTSL5	0004222;0031012	metalloendopeptidase activity ;extracellular matrix	ADAMTSL5	13.4547	10.2615	15.02	11.264	19.168	13.1036	1.98611	14.2925	17.4211	27.7743	16.0357	13.9972	22.7808	19.895	20.6293	24.1303	30.0897	25.0382	29.2018	62.7083	62.7083
1390923	ILMN_17943	CSNK2B	Homo sapiens casein kinase 2, beta polypeptide (CSNK2B), mRNA.	NM_001320.5	3.6503	3.18988	-1.15068	0.0090417	CSNK2B	0016055;0042802;0016301;0008605;0005956	Wnt receptor signaling pathway ;protein self binding ;kinase activity ;protein kinase CK2 regulator activity ;protein kinase CK2 complex	CSNK2B	2005.06	2326.32	1858.55	1771.82	2210.77	2026.07	2005.22	1773.72	1803.83	1630.77	1656.01	1497.84	1826.82	1585.82	1812.46	1977.3	1618.3	1594.73	2306.56	1770.58	2326.32
1390432	ILMN_18547	LRP6	Homo sapiens low density lipoprotein receptor-related protein 6 (LRP6), mRNA.	NM_002336.1	0.08755	0.06255	-1.40729	0.00911754	LRP6	0006897;0016055;0007275;0005515;0004872;0016021;0005886	endocytosis ;Wnt receptor signaling pathway ;development ;protein binding ;receptor activity ;integral to membrane ;plasma membrane	LRP6	27.0683	39.0338	39.1815	34.9286	39.8459	29.3777	38.7941	57.1328	24.8681	34.7865	26.5233	33.878	29.987	29.9219	19.5682	40.4605	24.8573	80.7482	78.1819	53.2081	80.7482
1389193	ILMN_20333	OLFML3	Homo sapiens olfactomedin-like 3 (OLFML3), mRNA.	NM_020190.2	0.24038	0.14207	-1.7013	0.0092252	OLFML3	0007267;0006833;0007165;0006091;0042310;0005185;0005576;0005625	cell-cell signaling ;water transport ;signal transduction ;generation of precursor metabolites and energy ;vasoconstriction ;neurohypophyseal hormone activity ;extracellular region ;soluble fraction	OLFML3	70.7584	109.822	218.9	151.232	97.1858	86.0589	104.713	68.0614	65.4011	77.7456	95.9033	59.1115	45.8682	76.8573	85.1725	46.3417	70.0613	157.344	107.827	63.0755	218.9
1395477	ILMN_12605	PDLIM5	Homo sapiens PDZ and LIM domain 5 (PDLIM5), transcript variant 5, mRNA.	NM_001011516.1	0.08516	0.11087	1.29462	0.00932861	PDLIM5	0007507;0046872;0003779;0042805;0005515;0030159;0008270;0005080;0005624;0005829	heart development ;metal ion binding ;actin binding ;actinin binding ;protein binding ;receptor signaling complex scaffold activity ;zinc ion binding ;protein kinase C binding ;membrane fraction ;cytosol	PDLIM5	43.5294	32.2209	40.4032	52.9556	47.2274	39.586	44.9612	43.8441	34.3035	67.8905	55.426	61.3413	49.9151	61.9328	57.1677	44.2072	40.3563	58.2058	43.24	66.1746	67.8905
1397186	ILMN_10394	SH3GLB1	Homo sapiens SH3-domain GRB2-like endophilin B1 (SH3GLB1), mRNA.	NM_016009.2	0.19574	0.15092	-1.30418	0.00938414	SH3GLB1	0006915;0008415;0016740;0008289;0005515;0005737	apoptosis ;acyltransferase activity ;transferase activity ;lipid binding ;protein binding ;cytoplasm	SH3GLB1	95.05	74.9107	75.6906	89.3654	96.0122	94.1513	76.7137	120.18	70.0859	92.6454	54.1793	73.7399	93.8143	61.3819	84.3208	51.8691	53.7989	91.7996	135.51	83.0193	135.51
1380229	ILMN_5504	RAB6B	Homo sapiens RAB6B, member RAS oncogene family (RAB6B), mRNA.	NM_016577.2	7.45507	9.5781	1.27769	0.00951775	RAB6B	0006886;0007264;0006888;0006890;000166;0003924;0005525;005795	intracellular protein transport ;small GTPase mediated signal transduction ;ER to Golgi transport ;retrograde vesicle-mediated transport Golgi to ER ;nucleotide binding ;GTPase activity ;GTP binding ;Golgi stack	RAB6B	6402.08	5965.97	4346.14	4517.68	4377.92	4186.19	4645.12	4567.47	5845.46	4852.3	4670.59	4398.22	6167.19	5938.21	5722.73	6587.81	5621.22	2863.29	1730.41	5226.33	6587.81
1396091	ILMN_1192	FAM57B	Homo sapiens family with sequence similarity 57, member B (FAM57B), mRNA.	NM_031478.3	2.89424	3.77874	1.29841	0.00957661	FAM57B	16021	integral to membrane	FAM57B	1703.52	2165.62	1476.8	1951.28	1372.45	1674.9	1666.23	1471.39	1778.63	1959.09	2037.53	1500.48	3238.7	2288.8	1867.95	1954.02	1707.92	1277.73	933.036	2293.83	3238.7
1387344	ILMN_22741	CCBL1	Homo sapiens cysteine conjugate-beta lyase; cytoplasmic (glutamine transaminase K, kyneurenine aminotransferase) (CCBL1), mRNA.	NM_004059.3	0.56554	0.69484	1.22185	0.00963134	CCBL1	0006575;0009058;0047804;0016829;0008483;0047316;0016212;0016847;0005829	amino acid derivative metabolism ;biosynthesis ;cysteine-S-conjugate beta-lyase activity ;lyase activity ;transaminase activity ;glutamine-phenylpyruvate transaminase activity ;kynurenine-oxoglutarate transaminase activity ;1-aminocyclopropane-1-carboxylate synthase activity ;cytosol	CCBL1	217.829	267.084	277.173	305.153	305.73	321.958	192.862	306.902	377.662	261.692	300.934	391.979	271.368	445.972	317.014	364.836	385.192	335.448	251.802	353.339	445.972
1391687	ILMN_16821	SHRM	Homo sapiens shroom (SHRM), mRNA.	NM_020859.1	0.28626	0.39817	1.38323	0.00968567	SHRM	5515	protein binding	SHRM	127.863	205.765	130.881	184.634	135.376	128.814	185.284	112.361	183.892	193.655	137.476	162.872	203.163	236.054	228.307	160.093	200.757	128.415	61.8406	210.52	236.054
1377848	ILMN_8647	C1orf24	Homo sapiens chromosome 1 open reading frame 24 (C1orf24), transcript variant 2, mRNA.	NM_052966.1	0.31967	0.16898	-1.90223	0.0097655	C1orf24	0006457;0006810;0031072;0051082;0008372	protein folding ;transport ;heat shock protein binding ;unfolded protein binding ;cellular component unknown	C1orf24	98.6158	90.8695	71.1951	137.992	260.51	272.828	116.765	103.396	31.0806	131.397	60.3336	97.9653	51.2467	102.071	90.6567	61.6792	61.0316	231.237	172.752	118.053	272.828
1388325	ILMN_21517	PAPPA	Homo sapiens pregnancy-associated plasma protein A, pappalysin 1 (PAPPA), mRNA.	NM_002581.3	0.06354	0.04405	-1.45038	0.010033	PAPPA	0007565;0006508;0030154;0046872;0008237;0008270;0005615;0016020	pregnancy ;proteolysis and peptidolysis ;cell differentiation ;metal ion binding ;metallopeptidase activity ;zinc ion binding ;extracellular space ;membrane	PAPPA	16.3743	21.7476	31.9932	30.3629	37.2654	30.9565	31.3875	53.5762	19.9578	21.4312	13.6896	15.2042	22.9436	28.7796	14.9815	39.0679	23.8652	49.6162	41.8003	21.3654	53.5762
1392987	ILMN_15068	IFNAR2	Homo sapiens interferon (alpha, beta and omega) receptor 2 (IFNAR2), transcript variant 3, mRNA.	NM_207584.1	0.32168	0.22182	-1.45821	0.0100586	IFNAR2	0009615;0007166;0007259;0004872;0004896;0004905;0005576;0005887;0005886	response to virus ;cell surface receptor linked signal transduction ;JAK-STAT cascade ;receptor activity ;hematopoietin/interferon-class (D200-domain) cytokine receptor activity ;interferon-alpha/beta receptor activity ;extracellular region ;integral to plasma membrane ;plasma membrane	IFNAR2	124.106	89.5141	145.621	159.078	148.991	151.352	165.26	137.245	84.7896	117.617	97.9346	125.205	91.0047	104.69	96.5748	114.712	100.466	146.209	288.305	117.192	288.305
1378665	ILMN_7574	KIAA0286	Homo sapiens KIAA0286 protein (KIAA0286), mRNA.	NM_015257.1	0.14683	0.19107	1.29408	0.0101399	KIAA0286	0004;0005554;0016021	biological process unknown ;molecular function unknown ;integral to membrane	KIAA0286	72.3057	66.536	71.0976	72.7975	72.5792	77.36	72.2132	92.5755	133.647	76.9024	82.087	104.652	82.9875	82.7997	87.9762	86.5766	90.4928	60.9958	68.0822	86.7339	133.647
1396334	ILMN_11403	CDK5RAP3	Homo sapiens CDK5 regulatory subunit associated protein 3 (CDK5RAP3), transcript variant 1, mRNA.	NM_176095.1	0.08504	0.14893	1.74173	0.0103518	CDK5RAP3	0007420;0008283;00079;0045664;0042808;0008372	brain development ;cell proliferation ;regulation of cyclin dependent protein kinase activity ;regulation of neuron differentiation ;neuronal Cdc2-like kinase binding ;cellular component unknown	CDK5RAP3	25.801	25.8716	74.5539	40.6736	50.4767	66.8951	52.7131	30.5288	38.6455	93.3564	68.1217	107.081	80.4178	87.0722	39.5826	92.6555	65.7888	40.5117	30.1102	38.7682	107.081
1395397	ILMN_12720	MBTPS1	Homo sapiens membrane-bound transcription factor peptidase, site 1 (MBTPS1), transcript variant 1, mRNA.	NM_003791.2	0.3335	0.47179	1.40686	0.0105284	MBTPS1	0006629;0008202;0006508;0008203;0008233;0005509;0004289;0016021;0005795;0005788	lipid metabolism ;steroid metabolism ;proteolysis and peptidolysis ;cholesterol metabolism ;peptidase activity ;calcium ion binding ;subtilase activity ;integral to membrane ;Golgi stack ;endoplasmic reticulum lumen	MBTPS1	184.87	131.421	186.163	203.609	160.26	219.684	225.791	141.847	197.236	236.492	224.917	191.021	321.783	254.589	225.798	226.442	275.962	60.9162	121.181	154.34	321.783
1390122	ILMN_18991	LOC387790	Homo sapiens hypothetical LOC387790 (LOC387790), mRNA.	NM_001013634.1	0.12501	0.17588	1.39915	0.0105366	LOC387790	0006355;0007275;0003700;0005634	regulation of transcription DNA-dependent ;development ;transcription factor activity ;nucleus	LOC387790	38.1666	38.2181	101.357	51.5474	56.1104	64.502	74.9593	78.4418	53.9715	101.208	64.1071	62.1957	83.1287	85.8998	88.5806	107.524	68.8754	74.7718	55.3716	113.19	113.19
1396618	ILMN_11144	FLJ20647	Homo sapiens hypothetical protein FLJ20647 (FLJ20647), mRNA.	NM_017918.3	0.52785	0.40391	-1.31411	0.0106702	FLJ20647	0006953;0030212;0004867;0005576	acute-phase response ;hyaluronan metabolism ;serine-type endopeptidase inhibitor activity ;extracellular region	FLJ20647	255.436	220.748	226.049	301.07	356.892	351.253	203.964	225.82	178.771	239.051	214.657	157.727	197.885	161.59	240.756	217.042	214.758	181.684	280.717	136.932	356.892
1386641	ILMN_2374	MUTYH	Homo sapiens mutY homolog (E. coli) (MUTYH), mRNA.	NM_012222.1	0.46321	0.64475	1.38424	0.0108335	MUTYH	0006284;0007049;0005975;0045786;0006298;0046872;0051539;0016798;0004519;0005506;0003677;0005634	base-excision repair ;cell cycle ;carbohydrate metabolism ;negative regulation of progression through cell cycle ;mismatch repair ;metal ion binding ;4 iron 4 sulfur cluster binding ;hydrolase activity acting on glycosyl bonds ;endonuclease activity ;iron ion binding ;DNA binding ;nucleus	MUTYH	157.249	149.881	151.413	161.86	283.775	277.165	247.856	208.111	258.48	397.128	221.187	375.444	272.238	415.742	241.392	349.229	250.893	298.542	315.676	414.197	415.742
1388490	ILMN_21311	ZNF696	Homo sapiens zinc finger protein 696 (ZNF696), mRNA.	NM_030895.1	0.4636	0.60066	1.2885	0.0108365	ZNF696	0046872;0003676;0008270;0005634	metal ion binding ;nucleic acid binding ;zinc ion binding ;nucleus	ZNF696	252.818	222.279	215.841	223.817	258.955	299.724	287.811	212.325	280.557	322.682	300.19	196.543	305.974	327.428	287.206	286.935	409.797	151.406	158.564	253.269	409.797
1392252	ILMN_16048	GARNL3	Homo sapiens GTPase activating Rap/RanGAP domain-like 3 (GARNL3), mRNA.	NM_032293.3	0.93413	1.20199	1.27966	0.0108395	GARNL3	5083	small GTPase regulator activity	GARNL3	413.291	557.619	470.657	588.426	631.645	525.684	611.827	407.322	676.289	520.885	635.986	660.853	558.272	674.02	511.971	683.137	791.064	311.331	252.676	493.065	791.064
1388684	ILMN_2094	C22orf9	Homo sapiens chromosome 22 open reading frame 9 (C22orf9), transcript variant 1, mRNA.	NM_015264.1	0.29527	0.3632	1.22326	0.01085	C22orf9	0006898;0015031;0005509;0005041;0004872;0016020;0016021	receptor mediated endocytosis ;protein transport ;calcium ion binding ;low-density lipoprotein receptor activity ;receptor activity ;membrane ;integral to membrane	C22orf9	158.384	113.871	132.517	148.622	151.717	167.187	125.41	179.641	185.211	150.313	159.476	212.937	158.192	183.273	130.573	177.832	219.719	147.707	111.096	174.454	219.719
1396544	ILMN_11240	RAB42	Homo sapiens RAB42, member RAS homolog family (RAB42), mRNA.	NM_152304.1	0.08373	0.05679	-1.48271	0.0108778	RAB42	0007264;000166;0005525	small GTPase mediated signal transduction ;nucleotide binding ;GTP binding	RAB42	47.8867	36.7324	43.5249	19.0832	31.16	33.8039	35.1781	51.1334	28.2799	27.2404	31.8986	34.7594	22.6821	16.5644	26.2995	40.7904	21.7129	57.4621	86.9454	35.5251	86.9454
1386899	ILMN_23439	NDUFA8	Homo sapiens NADH dehydrogenase (ubiquinone) 1 alpha subcomplex, 8, 19kDa (NDUFA8), nuclear gene encoding mitochondrial protein, mRNA.	NM_014222.2	6.05388	7.23307	1.1882	0.0108826	NDUFA8	0003954;0008137;0016491;0005739	NADH dehydrogenase activity ;NADH dehydrogenase (ubiquinone) activity ;oxidoreductase activity ;mitochondrion	NDUFA8	3586.94	4187.45	3610.89	3639.82	3686.37	3587.69	4099.56	3147.3	4432.55	3603.82	4151.05	3148.63	5329.84	4206.88	4366.18	3852.71	3912.43	2048.61	2674.31	3788.61	5329.84
1394681	ILMN_13686	LOC375449	Homo sapiens similar to microtubule associated testis specific serine/threonine protein kinase (LOC375449), mRNA.	NM_198828.1	0.23114	0.15936	-1.45844	0.0109467	LOC375449	0004674;0016301	protein serine/threonine kinase activity ;kinase activity	LOC375449	96.0585	99.2264	82.9323	129.367	128.972	74.7549	125.816	118.122	95.7309	74.6521	65.4952	87.6996	69.73	47.9273	80.3217	98.5305	60.7822	74.6779	188.255	77.8663	188.255
1395925	ILMN_12152	SOX15	Homo sapiens SRY (sex determining region Y)-box 15 (SOX15), mRNA.	NM_006942.1	1.04728	1.33284	1.26565	0.0109741	SOX15	0008584;0006325;0006357;0003702;0003700;000785;0005634	male gonad development ;establishment and/or maintenance of chromatin architecture ;regulation of transcription from RNA polymerase II promoter ;RNA polymerase II transcription factor activity ;transcription factor activity ;chromatin ;nucleus	SOX15	570.284	439.394	356.206	548.296	509.374	598.524	614.481	670.044	605.583	850.947	461.524	708.869	837.497	586.38	835.537	609.849	678.307	499.392	529.306	759.525	850.947
1387809	ILMN_22103	FAM77C	Homo sapiens family with sequence similarity 77, member C (FAM77C), mRNA.	NM_024522.1	0.06901	0.04466	-1.55374	0.0110057	FAM77C	0045449;0050708;0006457;0045861;0043022;0003677;0051082;0031072;0001671;0030192;0005792;0016021;0005788;005634	regulation of transcription ;regulation of protein secretion ;protein folding ;negative regulation of proteolysis ;ribosome binding ;DNA binding ;unfolded protein binding ;heat shock protein binding ;ATPase stimulator activity ;Hsp70/Hsc70 protein regulator activity ;microsome ;integral to membrane ;endoplasmic reticulum lumen ;nucleus	FAM77C	35.2881	40.4955	45.1089	34.9015	11.2231	35.1003	39.2873	32.854	28.7784	10.5756	19.7924	26.5841	23.9226	18.2527	24.0545	26.572	16.029	60.5643	29.835	27.9005	60.5643
1393579	ILMN_14081	POGZ	Homo sapiens pogo transposable element with ZNF domain (POGZ), transcript variant 3, mRNA.	NM_145796.2	0.26002	0.39549	1.51264	0.011074	POGZ	0007275;0046872;0003676;0008270;0003677;0005634	development ;metal ion binding ;nucleic acid binding ;zinc ion binding ;DNA binding ;nucleus	POGZ	69.6143	50.395	127.06	89.5209	163.591	163.832	148.507	167.519	179.603	220.309	101.779	207.479	190.44	190.726	105.688	207.737	176.676	153.933	139.618	317.986	317.986
1393883	ILMN_139237	MGAT4A	Homo sapiens mannosyl (alpha-1,3-)-glycoprotein beta-1,4-N-acetylglucosaminyltransferase, isoenzyme A (MGAT4A), mRNA.	NM_012214.1	0.22797	0.14779	-1.55105	0.0111158	MGAT4A	0006491;0005975;0016758;0008454;0016020	N-glycan processing ;carbohydrate metabolism ;transferase activity transferring hexosyl groups ;alpha-13-mannosylglycoprotein 4-beta-N-acetylglucosaminyltransferase activity ;membrane	MGAT4A	89.416	122.683	135.568	144.24	134.64	151.824	63.5073	79.6335	67.2324	64.22	85.0523	65.0985	74.7808	87.6297	110.766	27.5809	86.7492	95.5398	105.658	40.2466	151.824
1381468	ILMN_3617	RPP40	Homo sapiens ribonuclease P 40kDa subunit (RPP40), mRNA.	NM_006638.2	1.56082	1.31812	-1.19069	0.0111734	RPP40	0008033;0004526;0016787;0005515;0005655;0005634	tRNA processing ;ribonuclease P activity ;hydrolase activity ;protein binding ;nucleolar ribonuclease P complex ;nucleus	RPP40	782.769	918.946	810.421	835.784	887.151	726.997	972.531	828.998	861.014	587.787	946.236	502.893	570.114	657.685	739.528	658.618	675.953	601.862	778.16	660.11	972.531
1394066	ILMN_138578	LOC92017	Homo sapiens similar to RIKEN cDNA 4933437K13 (LOC92017), mRNA.	NM_001009607.1	0.04515	0.06542	1.44093	0.0111937	LOC92017	7242	intracellular signaling cascade	LOC92017	15.0063	13.0812	33.7617	18.3292	18.1863	22.6404	17.6773	26.0052	18.9115	50.4781	22.1558	35.1885	37.1058	36.4078	24.3424	46.2161	21.4031	39.756	49.2621	37.2323	50.4781
1394422	ILMN_137859	PAP2	Homo sapiens phosphatidic acid phosphatase type 2 (PAP2), mRNA.	NM_001010861.1	1.31396	1.70196	1.28815	0.0112127	PAP2	0008152;0016791;000287;0016787;0005515;0005737	metabolism ;phosphoric monoester hydrolase activity ;magnesium ion binding ;hydrolase activity ;protein binding ;cytoplasm	PAP2	809.632	815.768	669.826	945.988	576.867	566.179	900.092	734.305	952.055	785.267	830.99	660.752	1124.21	916.909	1028.12	993.699	983.225	468.234	351.843	739.024	1124.21
1391795	ILMN_16748	DDIT3	Homo sapiens DNA-damage-inducible transcript 3 (DDIT3), mRNA.	NM_004083.4	1.09707	0.74819	-1.47443	0.0113662	DDIT3	0006974;0006355;0030503;0007050;0006350;00074;0042789;0003714;0003700;005634	response to DNA damage stimulus ;regulation of transcription DNA-dependent ;regulation of cell redox homeostasis ;cell cycle arrest ;transcription ;regulation of cell cycle ;mRNA transcription from RNA polymerase II promoter ;transcription corepressor activity ;transcription factor activity ;nucleus	DDIT3	685.011	328.41	637.303	399.19	481.173	520.655	484.304	525.779	393.102	286.284	453.619	344.442	287.428	449.135	356.145	298.818	323.529	550.248	930.507	552.441	930.507
1377748	ILMN_8740	PKD1	Homo sapiens polycystic kidney disease 1 (autosomal dominant) (PKD1), transcript variant 1, mRNA.	NM_001009944.1	0.92137	1.26907	1.36978	0.0113812	PKD1	0007156;0009653;0007161;0007218;0005529;0016020;0016021;0005887	homophilic cell adhesion ;morphogenesis ;calcium-independent cell-matrix adhesion ;neuropeptide signaling pathway ;sugar binding ;membrane ;integral to membrane ;integral to plasma membrane	PKD1	493.517	280.804	684.633	380.122	491.334	609.744	592.335	373.058	416.814	888.984	470.234	831.474	691.652	545.825	588.256	761.708	738.35	438.915	321.291	615.293	888.984
1387254	ILMN_22832	RYR3	Homo sapiens ryanodine receptor 3 (RYR3), mRNA.	NM_001036.2	0.05729	0.10131	1.75865	0.0113856	RYR3	0006816;0006874;0006812;0015278;0004872;0005219;0005509;0005624;0016020;0005887	calcium ion transport ;calcium ion homeostasis ;cation transport ;calcium-release channel activity ;receptor activity ;ryanodine-sensitive calcium-release channel activity ;calcium ion binding ;membrane fraction ;membrane ;integral to plasma membrane	RYR3	41.1324	16.7504	21.8385	29.8089	33.169	29.5436	9.06162	39.7027	41.311	73.1272	29.8087	93.851	42.479	47.4283	43.7417	45.511	26.3632	61.5015	21.5618	53.67	93.851
1387411	ILMN_22623	RARS	Homo sapiens arginyl-tRNA synthetase (RARS), mRNA.	NM_002887.3	3.11677	2.81555	-1.11312	0.0114142	RARS	0006420;0006412;000166;0004814;0005524;0016874;0005625;0005737	arginyl-tRNA aminoacylation ;protein biosynthesis ;nucleotide binding ;arginine-tRNA ligase activity ;ATP binding ;ligase activity ;soluble fraction ;cytoplasm	RARS	1766.09	1772.24	1570.17	1588.47	1693.91	1750.37	1951.63	1748.15	1661.69	1468.84	1581.31	1405.9	1389.25	1390.36	1692.46	1736.19	1356.85	1298.85	1710.59	1425.13	1951.63
1388309	ILMN_2150	EHHADH	Homo sapiens enoyl-Coenzyme A, hydratase/3-hydroxyacyl Coenzyme A dehydrogenase (EHHADH), mRNA.	NM_001966.2	0.09185	0.12451	1.34813	0.0115747	EHHADH	0006631;0008152;0006091;0006629;0004300;0016829;0003857;0016853;0004165;0016491;0005777	fatty acid metabolism ;metabolism ;generation of precursor metabolites and energy ;lipid metabolism ;enoyl-CoA hydratase activity ;lyase activity ;3-hydroxyacyl-CoA dehydrogenase activity ;isomerase activity ;dodecenoyl-CoA delta-isomerase activity ;oxidoreductase activity ;peroxisome	EHHADH	30.2675	48.3429	50.2815	37.9463	51.0173	59.6682	54.0401	48.3179	46.217	66.2568	48.7146	67.7	40.8709	64.436	61.1837	50.6355	56.5203	43.5843	53.1032	98.3983	98.3983
1390337	ILMN_18634	OPCML	Homo sapiens opioid binding protein/cell adhesion molecule-like (OPCML), transcript variant 1, mRNA.	NM_002545.3	0.09002	0.13699	1.51338	0.01162	OPCML	0008038;0007155;0004985;0005515;0016021;0005887;0005886	neuron recognition ;cell adhesion ;opioid receptor activity ;protein binding ;integral to membrane ;integral to plasma membrane ;plasma membrane	OPCML	34.9199	15.3491	47.2515	28.299	46.0974	58.7176	69.4674	49.5588	41.2005	92.7999	41.9236	71.6902	49.1662	52.5462	67.8401	88.7045	46.7659	66.0734	57.4861	100.971	100.971
1384784	ILMN_26384	RFPL2	Homo sapiens ret finger protein-like 2 (RFPL2), mRNA.	NM_006605.1	0.16788	0.26747	1.5844	0.011635	RFPL2	0016567;0004842;0046872;0008270;0005515;000151	protein ubiquitination ;ubiquitin-protein ligase activity ;metal ion binding ;zinc ion binding ;protein binding ;ubiquitin ligase complex	RFPL2	104.068	75.561	99.7831	52.2376	68.8157	133.14	137.306	83.9924	130.406	75.8914	151.465	109.485	145.823	150.713	160.936	85.0169	147.369	14.5713	40.6342	129.774	160.936
1387693	ILMN_22371	HIC2	Homo sapiens hypermethylated in cancer 2 (HIC2), mRNA.	NM_015094.1	0.44918	0.64493	1.42788	0.0116916	HIC2	0045892;0006350;0046872;0008270;0008022;0003677;0005634	negative regulation of transcription DNA-dependent ;transcription ;metal ion binding ;zinc ion binding ;protein C-terminus binding ;DNA binding ;nucleus	HIC2	216.167	142.107	141.581	172.939	234.542	288.299	286.288	239.87	216.395	318.654	164.015	319.513	324.248	311.126	289.9	381.362	358.837	211.006	256.812	506.579	506.579
1390816	ILMN_18011	BTNL9	Homo sapiens butyrophilin-like 9 (BTNL9), mRNA.	NM_152547.2	0.09219	0.19128	2.06337	0.0117069	BTNL9	16021	integral to membrane	BTNL9	27.4054	26.3665	55.4196	43.8467	62.9707	56.4676	50.6704	53.4147	64.3691	77.2413	47.8238	102.964	65.2897	42.9066	63.1466	172.327	89.4792	25.6932	74.3578	175.998	175.998
1385782	ILMN_24943	C6orf136	Homo sapiens chromosome 6 open reading frame 136 (C6orf136), mRNA.	NM_145029.1	2.99392	3.61603	1.20113	0.0117648	C6orf136	0008283;0009887;0008015;0007585;0006281;0004519;0030023;0005525;0005201;0005578;0005737	cell proliferation ;organ morphogenesis ;circulation ;respiratory gaseous exchange ;DNA repair ;endonuclease activity ;extracellular matrix constituent conferring elasticity ;GTP binding ;extracellular matrix structural constituent ;extracellular matrix (sensu Metazoa) ;cytoplasm	C6orf136	2092.44	1589.22	1319.01	1582.78	1970.97	1808.5	1754.92	1784.49	1853.18	1849.42	1729.87	1623.08	2153.54	2062.03	1916.73	2486.46	2067.9	1326.07	989.16	1816.51	2486.46
1382891	ILMN_28885	GDF2	Homo sapiens growth differentiation factor 2 (GDF2), mRNA.	NM_016204.1	0.10531	0.08115	-1.30497	0.0117957	GDF2	0040007;0005125;0008083;0005615	growth ;cytokine activity ;growth factor activity ;extracellular space	GDF2	50.7068	45.2577	65.7862	57.1761	46.5336	43.7713	48.0432	45.5167	40.9935	31.1978	36.1859	43.6126	36.7634	38.7337	29.4388	63.6165	34.7271	75.3482	65.4154	45.4802	75.3482
1384717	ILMN_26281	C18orf22	Homo sapiens chromosome 18 open reading frame 22 (C18orf22), mRNA.	NM_024805.1	0.16383	0.19432	1.17958	0.0118491	C18orf22	0006364;0005739	rRNA processing ;mitochondrion	C18orf22	56.5739	57.6198	91.1732	79.6383	82.9851	85.1673	80.6573	76.3238	115.49	98.5708	97.4391	74.1454	85.641	84.5898	87.8362	80.2661	97.5196	89.6094	111.852	104.106	115.49
1378277	ILMN_8132	ACACA	Homo sapiens acetyl-Coenzyme A carboxylase alpha (ACACA), transcript variant 2, mRNA.	NM_198839.1	0.09877	0.1249	1.25757	0.0118642	ACACA	0006633;0008152;0003989;000166;0009374;0004075;0005524;0016874	fatty acid biosynthesis ;metabolism ;acetyl-CoA carboxylase activity ;nucleotide binding ;biotin binding ;biotin carboxylase activity ;ATP binding ;ligase activity	ACACA	56.7194	46.6328	38.3764	53.1557	48.6967	37.0781	44.1005	44.3089	59.9411	60.9751	47.2966	56.5582	64.7242	61.6327	55.7256	58.9209	67.0594	86.3978	54.704	69.246	86.3978
1387365	ILMN_22764	ZNF319	Homo sapiens zinc finger protein 319 (ZNF319), mRNA.	NM_020807.1	0.7689	0.92053	1.19061	0.011895	ZNF319	0006355;0006350;0046872;0008270;0003677;0005634	regulation of transcription DNA-dependent ;transcription ;metal ion binding ;zinc ion binding ;DNA binding ;nucleus	ZNF319	385.639	448.944	251.634	390.817	418.568	438.815	388.401	418.069	390.027	546.954	432.082	406.286	585.705	472.263	435.191	473.486	437.601	372.78	343.037	482.394	585.705
1392851	ILMN_15317	ELL2	Homo sapiens elongation factor, RNA polymerase II, 2 (ELL2), mRNA.	NM_012081.3	0.47222	0.33858	-1.40242	0.0119799	ELL2	0006368;0006355;0006350;0003702;0008023;0005634	RNA elongation from RNA polymerase II promoter ;regulation of transcription DNA-dependent ;transcription ;RNA polymerase II transcription factor activity ;transcription elongation factor complex ;nucleus	ELL2	201.808	253.789	318.903	228.971	225.977	272.337	112.989	188.038	230.854	126.063	220.969	133.279	174.093	218.526	131.72	107.572	202.854	205.771	292.633	98.7744	318.903
1377818	ILMN_861	LSAMP	Homo sapiens limbic system-associated membrane protein (LSAMP), mRNA.	NM_002338.2	2.28389	2.84209	1.23755	0.0121617	LSAMP	0007155;0007399;0005515;0005624;0016020	cell adhesion ;neurogenesis ;protein binding ;membrane fraction ;membrane	LSAMP	1438.78	1397.92	954.529	924.735	1056.03	1396.28	1284.68	1541.25	1092.79	1472.74	1228.19	1346.17	1837.66	1446.98	1602.98	1944.28	1546.57	1249	925.556	1722.26	1944.28
1383646	ILMN_27905	SPI1	Homo sapiens spleen focus forming virus (SFFV) proviral integration oncogene spi1 (SPI1), mRNA.	NM_003120.1	0.42634	0.22945	-1.86843	0.0122112	SPI1	0006355;0006350;000122;0003723;0005515;0003700;0043565;0005634	regulation of transcription DNA-dependent ;transcription ;negative regulation of transcription from RNA polymerase II promoter ;RNA binding ;protein binding ;transcription factor activity ;sequence-specific DNA binding ;nucleus	SPI1	125.585	102.928	187.502	110.238	275.304	298.936	149.699	155.324	83.7476	159.705	93.9998	100.243	108.451	143.484	147.257	64.3145	88.9327	424.156	240.082	103.606	424.156
1396018	ILMN_11823	ZNF271	Homo sapiens zinc finger protein 271 (ZNF271), mRNA.	NM_006629.3	1.11945	1.3246	1.17674	0.0122152	ZNF271	0006355;0006350;0046872;0008270;0003677;0005634	regulation of transcription DNA-dependent ;transcription ;metal ion binding ;zinc ion binding ;DNA binding ;nucleus	ZNF271	417.163	701.91	571.303	654.555	548.713	569.808	521.88	658.531	644.74	800.291	568.014	618.063	744.234	818.268	667.466	655.608	674.705	553.403	516.991	684.974	818.268
1384994	ILMN_2603	PCK2	Homo sapiens phosphoenolpyruvate carboxykinase 2 (mitochondrial) (PCK2), nuclear gene encoding mitochondrial protein, transcript variant 1, mRNA.	NM_004563.2	0.25977	0.19382	-1.34768	0.0122445	PCK2	0006094;0004613;0030145;000166;0016829;0004611;0005525;0005739	gluconeogenesis ;phosphoenolpyruvate carboxykinase (GTP) activity ;manganese ion binding ;nucleotide binding ;lyase activity ;phosphoenolpyruvate carboxykinase activity ;GTP binding ;mitochondrion	PCK2	95.06	100.373	119	111.279	192.836	148.032	147.042	110.059	77.6478	113.753	74.4528	78.0756	66.6482	100.155	117.046	71.9785	80.2164	140.49	104.974	138.444	192.836
1386145	ILMN_2437	FLJ39653	Homo sapiens hypothetical protein FLJ39653 (FLJ39653), mRNA.	NM_152684.1	0.36083	0.4945	1.36292	0.012331	FLJ39653	0007600;0007165;0007186;0007608;0004984;0004872;0005887	sensory perception ;signal transduction ;G-protein coupled receptor protein signaling pathway ;sensory perception of smell ;olfactory receptor activity ;receptor activity ;integral to plasma membrane	FLJ39653	101.26	120.037	232.692	126.443	142.017	260.575	183.662	230.36	246.326	283.83	177.201	343.993	158.701	283.27	206.372	236.869	233.887	213.856	140.366	246.991	343.993
1389210	ILMN_20358	SLC7A9	Homo sapiens solute carrier family 7 (cationic amino acid transporter, y+ system), member 9 (SLC7A9), mRNA.	NM_014270.3	0.11377	0.20746	1.81341	0.0123765	SLC7A9	0006810;0006461;0006520;0006865;0005279;0015184;0005887;0005886	transport ;protein complex assembly ;amino acid metabolism ;amino acid transport ;amino acid-polyamine transporter activity ;L-cystine transporter activity ;integral to plasma membrane ;plasma membrane	SLC7A9	39.9225	10.9784	39.7658	37.6243	70.8798	137.309	101.93	52.2831	75.613	110.261	57.8103	108.007	160.296	108.525	53.2169	71.7605	106.904	47.8893	44.1269	133.989	160.296
1382734	ILMN_29117	PMS2L2	Homo sapiens postmeiotic segregation increased 2-like 2 (PMS2L2), mRNA.	NM_002679.1	0.08218	0.15229	1.84291	0.0124236	PMS2L2	0006298;0005554;0008372	mismatch repair ;molecular function unknown ;cellular component unknown	PMS2L2	39.6444	23.596	39.9321	36.0588	87.2678	32.5325	48.4605	47.0137	77.4792	111.439	46.3094	127.107	38.1378	89.6145	50.5007	72.9373	79.2617	39.2833	34.1218	38.7394	127.107
1384192	ILMN_27109	TYROBP	Homo sapiens TYRO protein tyrosine kinase binding protein (TYROBP), transcript variant 1, mRNA.	NM_003332.2	1.12677	0.54457	-2.08055	0.0124475	TYROBP	0007242;0006968;0005057;0005887	intracellular signaling cascade ;cellular defense response ;receptor signaling protein activity ;integral to plasma membrane	TYROBP	265.196	336.729	555.356	360.765	1085.05	1108.41	245.647	491.034	190.262	562.056	316.009	194.228	311.292	440.294	287.319	25.95	260.568	723.805	559.856	135.266	1108.41
1390363	ILMN_18672	DAB2	Homo sapiens disabled homolog 2, mitogen-responsive phosphoprotein (Drosophila) (DAB2), mRNA.	NM_001343.1	0.44415	0.28118	-1.58836	0.0125452	DAB2	8283	cell proliferation	DAB2	119.881	159.491	162.823	235.522	305.578	222.298	250.101	177.662	98.4389	106.361	137.332	151.336	101.116	179.806	105.707	67.7702	137.799	156.887	375.978	255.739	375.978
1384647	ILMN_26427	LOC317671	Homo sapiens LOC317671 (LOC317671), mRNA.	NM_173362.2	0.12231	0.08241	-1.49244	0.0126	LOC317671	0006118;0006810;0016491	electron transport ;transport ;oxidoreductase activity	LOC317671	26.4985	55.3541	68.3355	62.6172	54.9076	51.2875	47.4142	69.0293	50.2348	34.2195	44.0888	49.8541	28.1063	43.2336	43.5984	34.8919	50.6513	71.396	114.796	22.7431	114.796
1394591	ILMN_13747	WDR5	Homo sapiens WD repeat domain 5 (WDR5), transcript variant 2, mRNA.	NM_052821.3	0.75291	0.90769	1.19894	0.0126851	WDR5	0007186;0004871;0005515;0005834	G-protein coupled receptor protein signaling pathway ;signal transducer activity ;protein binding ;heterotrimeric G-protein complex	WDR5	451.467	334.455	357.554	315.668	314.686	476.882	457.959	364.938	393.212	544.215	410.799	419.976	490.693	431.278	477.246	539.529	424.366	419.833	285.477	464.776	544.215
1395800	ILMN_12203	RERE	Homo sapiens arginine-glutamic acid dipeptide (RE) repeats (RERE), mRNA.	NM_012102.2	3.05983	3.74837	1.21827	0.0127057	RERE	0006355;0005515;0003700;0005634	regulation of transcription DNA-dependent ;protein binding ;transcription factor activity ;nucleus	RERE	1785.17	1643.67	1685.52	1435.39	1546.17	1913	1830.93	1969.17	1597.14	2119.11	1567.2	2100.89	2587.53	2044.73	1867.08	2565.74	2274.9	1540.58	1256.6	1582.68	2587.53
1384688	ILMN_26473	CENTA2	Homo sapiens centaurin, alpha 2 (CENTA2), mRNA.	NM_018404.1	0.51854	0.26677	-1.95459	0.0127088	CENTA2	0007507;0043087;0046872;0030674;0043533;0043325;0008270;0005547;0005546;0005096;0005737;0005886;0005740	heart development ;regulation of GTPase activity ;metal ion binding ;protein binding bridging ;inositol 1345 tetrakisphosphate binding ;phosphatidylinositol-34-bisphosphate binding ;zinc ion binding ;phosphatidylinositol-345-triphosphate binding ;phosphatidylinositol-45-bisphosphate binding ;GTPase activator activity ;cytoplasm ;plasma membrane ;mitochondrial membrane	CENTA2	85.9055	130.62	238.478	181.603	453.575	391.073	190.578	148.655	99.2546	178.487	114.158	119.782	114.665	209.294	132.276	69.6681	108.871	455.724	277.295	127.949	455.724
1396364	ILMN_11446	LARS2	Homo sapiens leucyl-tRNA synthetase 2, mitochondrial (LARS2), nuclear gene encoding mitochondrial protein, mRNA.	NM_015340.3	0.45682	0.56356	1.22687	0.0127219	LARS2	0006412;0006429;0004823;000166;0005524;0016874;0005739	protein biosynthesis ;leucyl-tRNA aminoacylation ;leucine-tRNA ligase activity ;nucleotide binding ;ATP binding ;ligase activity ;mitochondrion	LARS2	272.513	175.547	178.451	209.652	234.216	263.762	255.768	196.63	323.944	236.52	244.192	318.49	245.829	322.734	239.785	219.815	334.588	276.953	171.226	291.046	334.588
1389913	ILMN_19361	LRSAM1	Homo sapiens leucine rich repeat and sterile alpha motif containing 1 (LRSAM1), transcript variant 3, mRNA.	NM_001005374.1	1.48923	1.82115	1.21614	0.0127811	LRSAM1	0016567;0015031;0004842;0046872;0008270;0016874;00151	protein ubiquitination ;protein transport ;ubiquitin-protein ligase activity ;metal ion binding ;zinc ion binding ;ligase activity ;ubiquitin ligase complex	LRSAM1	770.934	1035.79	644.151	863.422	679.266	777.172	830.58	705.839	758.966	903.495	792.055	904.544	953.426	1015.76	915.187	1165.03	950.812	825.977	632.773	1225.71	1225.71
1379630	ILMN_6255	SVIL	Homo sapiens supervillin (SVIL), transcript variant 1, mRNA.	NM_003174.2	0.33984	0.17491	-1.95371	0.0128728	SVIL	0007010;0051016;0007519;0005509;0051015;0015629;0043034;0005737;0005634;0005886	cytoskeleton organization and biogenesis ;barbed-end actin filament capping ;myogenesis ;calcium ion binding ;actin filament binding ;actin cytoskeleton ;costamere ;cytoplasm ;nucleus ;plasma membrane	SVIL	103.97	72.9695	114.318	216.34	228.281	93.2726	153.566	96.8976	55.345	87.5012	83.9851	123.028	63.64	87.83	74.735	66.5759	62.5959	219.267	341.915	129.077	341.915
1390600	ILMN_18332	PHF1	Homo sapiens PHD finger protein 1 (PHF1), transcript variant 2, mRNA.	NM_024165.1	0.12815	0.15422	1.19679	0.0128956	PHF1	0006355;0046872;0003676;0008270;0005515;0003700;0005634	regulation of transcription DNA-dependent ;metal ion binding ;nucleic acid binding ;zinc ion binding ;protein binding ;transcription factor activity ;nucleus	PHF1	49.6172	54.3867	73.0698	58.9106	55.75	67.2862	77.7059	69.1636	62.0685	70.0927	89.0679	79.9515	79.7958	68.6454	74.466	60.4012	72.3933	77.2928	62.6144	81.645	89.0679
1382064	ILMN_30204	L3MBTL2	Homo sapiens l(3)mbt-like 2 (Drosophila) (L3MBTL2), transcript variant 1, mRNA.	NM_031488.4	0.96458	1.2079	1.24536	0.0129052	L3MBTL2	0006355;0016568;0046872;0003714;0005634	regulation of transcription DNA-dependent ;chromatin modification ;metal ion binding ;transcription corepressor activity ;nucleus	L3MBTL2	449.422	642.589	562.85	436.253	465.27	559.091	593.497	500.624	606.339	671.199	514.946	468.852	799.485	555.179	649.877	718.937	716.789	386.874	306.932	557.659	799.485
1393157	ILMN_1485	LOC134147	Homo sapiens similar to mouse 2310016A09Rik gene (LOC134147), mRNA.	NM_138809.2	1.27747	1.59791	1.24395	0.0129333	LOC134147	16787	hydrolase activity	LOC134147	579.934	865.957	589.203	824.97	677.602	677.591	892.842	613.667	840.98	795.766	803.322	774.864	760.168	921.489	1108.7	662.568	768.395	515.776	393.513	950.799	1108.7
1396386	ILMN_11470	PPP6C	Homo sapiens protein phosphatase 6, catalytic subunit (PPP6C), mRNA.	NM_002721.3	2.81735	2.54853	-1.11161	0.013028	PPP6C	0006470;00082;0030145;0046872;0016787;0004722;0005515;005506	protein amino acid dephosphorylation ;G1/S transition of mitotic cell cycle ;manganese ion binding ;metal ion binding ;hydrolase activity ;protein serine/threonine phosphatase activity ;protein binding ;iron ion binding	PPP6C	1734.07	1662.3	1359.21	1583.73	1684.9	1592.27	1474.32	1602.55	1497.09	1443.83	1551.05	1353.39	1383.57	1441.89	1385.26	1284.35	1128.05	1306.8	1197.08	1139.85	1734.07
1387959	ILMN_21880	SOX12	Homo sapiens SRY (sex determining region Y)-box 12 (SOX12), mRNA.	NM_006943.2	0.13903	0.19583	1.4008	0.0130302	SOX12	0006355;0006357;0003702;0003677;0005634	regulation of transcription DNA-dependent ;regulation of transcription from RNA polymerase II promoter ;RNA polymerase II transcription factor activity ;DNA binding ;nucleus	SOX12	49.7874	25.52	56.8459	67.6008	76.7207	82.2197	78.2112	90.2593	74.6457	105.11	63.779	105.208	69.2056	94.4106	64.8772	141.549	87.4978	72.6321	99.1166	120.071	141.549
1393185	ILMN_14668	RPN1	Homo sapiens ribophorin I (RPN1), mRNA.	NM_002950.3	4.50817	3.89326	-1.16436	0.0130313	RPN1	0006486;0004579;0016740;0003723;0005788;0016021;0008250	protein amino acid glycosylation ;dolichyl-diphosphooligosaccharide-protein glycotransferase activity ;transferase activity ;RNA binding ;endoplasmic reticulum lumen ;integral to membrane ;oligosaccharyl transferase complex	RPN1	2905.05	2669.55	2188.74	2350.61	2665.21	3143.47	1986.23	2147.31	2096.14	2181.55	2054.12	1904.36	2329.16	2222.34	2214.32	2380.09	1721.67	2562.53	2166.93	2008.35	3143.47
1388221	ILMN_21599	KCNT1	Homo sapiens potassium channel, subfamily T, member 1 (KCNT1), mRNA.	NM_020822.1	4.98499	6.33911	1.26463	0.0130323	KCNT1	0006811;0006813;0030955;0005509;0015269;0005244;0016020;0016021	ion transport ;potassium ion transport ;potassium ion binding ;calcium ion binding ;calcium-activated potassium channel activity ;voltage-gated ion channel activity ;membrane ;integral to membrane	KCNT1	2804.43	2133.99	2832.9	2680.54	2969.63	3209.14	2832.96	3893.15	2597.75	4215.03	2740.16	3441.32	3647.77	4090.39	2553.99	3823.83	3829.59	2247.9	2083.64	4328.18	4328.18
1384137	ILMN_2725	IFI16	Homo sapiens interferon, gamma-inducible protein 16 (IFI16), mRNA.	NM_005531.1	0.62865	0.34835	-1.81467	0.0131614	IFI16	0008283;0006955;0006355;0009615;0006350;0042771;0030224;0005515;0003690;0016564;0005654;0005730	cell proliferation ;immune response ;regulation of transcription DNA-dependent ;response to virus ;transcription ;DNA damage response signal transduction by p53 class mediator resulting in induction of apoptosis ;monocyte differentiation ;protein binding ;double-stranded DNA binding ;transcriptional repressor activity ;nucleoplasm ;nucleolus	IFI16	270.805	148.213	239.225	185.321	528.588	391.567	138.078	260.599	115.542	325.102	184.43	230.289	132.965	144.816	136.538	131.175	126.447	397.907	550.229	150.432	550.229
1377170	ILMN_9502	GDPD3	Homo sapiens glycerophosphodiester phosphodiesterase domain containing 3 (GDPD3), transcript variant 1, mRNA.	NM_001031718.1	0.07092	0.11805	1.65531	0.0132332	GDPD3	0006071;0008889	glycerol metabolism ;glycerophosphodiester phosphodiesterase activity	GDPD3	25.5	4.88727	14.2434	15.1173	25.8764	53.9578	38.0111	53.5506	32.0728	86.7592	48.4109	65.4571	71.5502	55.716	35.8337	50.7261	37.6016	64.8177	85.0761	87.0732	87.0732
1396496	ILMN_11187	CLTCL1	Homo sapiens clathrin, heavy polypeptide-like 1 (CLTCL1), transcript variant 2, mRNA.	NM_007098.1	0.0759	0.09293	1.21749	0.013251	CLTCL1	0009653;0006898;0004871;0005488;0030125;0030132	morphogenesis ;receptor mediated endocytosis ;signal transducer activity ;binding ;clathrin vesicle coat ;clathrin coat of coated pit	CLTCL1	32.6632	26.7431	43.4511	34.89	40.7896	40.5866	42.8068	42.5133	50.0651	54.4525	29.0024	51.0554	47.0111	51.8383	38.6246	39.7001	39.7797	47.533	54.0637	57.3796	57.3796
1377267	ILMN_9406	CD2BP2	Homo sapiens CD2 antigen (cytoplasmic tail) binding protein 2 (CD2BP2), mRNA.	NM_006110.1	1.10759	0.83816	-1.32879	0.0133948	CD2BP2	0019735;0005737	antimicrobial humoral response (sensu Vertebrata) ;cytoplasm	CD2BP2	497.838	534.361	808.911	557.413	530.352	398.663	685.406	388.396	446.739	269.626	537.987	387.942	260.307	398.995	580.689	481.614	501.451	542.841	689.799	389.365	808.911
1388336	ILMN_21531	CD74	Homo sapiens CD74 antigen (invariant polypeptide of major histocompatibility complex, class II antigen-associated) (CD74), transcript variant 3, mRNA.	NM_001025158.1	3.82823	1.97027	-1.95376	0.0134586	CD74	0008283;0006886;0007165;0019883;0043030;0006955;0045058;0043066;0016064;0006457;0006461;0001516;0042802;0019955;0051082;0042289;0005622;0016021;00016020	cell proliferation ;intracellular protein transport ;signal transduction ;antigen presentation endogenous antigen ;regulation of macrophage activation ;immune response ;T cell selection ;negative regulation of apoptosis ;humoral defense mechanism (sensu Vertebrata) ;protein folding ;protein complex assembly ;prostaglandin biosynthesis ;protein self binding ;cytokine binding ;unfolded protein bind…	CD74	864.552	1612.82	2295.53	1705.26	3068.51	3088.14	1147.88	948.52	685.596	2132.92	1129.94	743.583	1490.78	1289.74	1170.03	198.215	1101.03	3992.17	2176.21	509.704	3992.17
1388186	ILMN_21755	TRIP12	Homo sapiens thyroid hormone receptor interactor 12 (TRIP12), mRNA.	NM_004238.1	1.39513	1.16396	-1.20525	0.0136016	TRIP12	0016567;0046966;0004842;0005488;0016874;0005829;0043234;0005622	protein ubiquitination ;thyroid hormone receptor binding ;ubiquitin-protein ligase activity ;binding ;ligase activity ;cytosol ;protein complex ;intracellular	TRIP12	672.794	861.83	957.988	804.337	657.297	553.601	653.242	760.444	735.808	567.832	749.251	647.449	642.314	533.289	576.557	527.486	561.547	596.887	703.257	458.789	957.988
1387232	ILMN_23003	ZNF573	Homo sapiens zinc finger protein 573 (ZNF573), mRNA.	NM_152360.2	1.35116	1.63766	1.20536	0.0136769	ZNF573	0006355;0046872;0003676;0008270;0005634	regulation of transcription DNA-dependent ;metal ion binding ;nucleic acid binding ;zinc ion binding ;nucleus	ZNF573	509.701	680.681	667.822	507.693	666.956	821.453	710.554	904.483	839.026	880.005	690.847	862.699	948.446	865.645	807.215	978.514	751.903	786.638	679.862	969.652	978.514
1390488	ILMN_18627	TNFSF13B	Homo sapiens tumor necrosis factor (ligand) superfamily, member 13b (TNFSF13B), mRNA.	NM_006573.3	0.17728	0.12626	-1.41187	0.0137253	TNFSF13B	0008283;0006955;0008284;0007165;0005164;0005615;0016020;0005625;0005887	cell proliferation ;immune response ;positive regulation of cell proliferation ;signal transduction ;tumor necrosis factor receptor binding ;extracellular space ;membrane ;soluble fraction ;integral to plasma membrane	TNFSF13B	65.2181	86.1144	81.0951	70.1937	118.292	111.214	84.486	61.619	76.9692	46.6132	81.0236	45.617	40.399	80.1637	67.8817	42.0786	75.5078	83.9448	114.886	58.16	118.292
1377199	ILMN_9535	WASF3	Homo sapiens WAS protein family, member 3 (WASF3), mRNA.	NM_006646.4	5.06623	6.00563	1.17889	0.0139033	WASF3	0030041;0006461;0003779;0015629	actin filament polymerization ;protein complex assembly ;actin binding ;actin cytoskeleton	WASF3	3029.44	2959.42	2585.58	2440.38	3415.54	2908.79	3420	2149.55	3273.57	3216.99	2914.57	3521.55	3747.27	2992.88	4435.86	2820.16	3087.11	2323.66	2789.07	3480.3	4435.86
1380867	ILMN_4611	OSBPL7	Homo sapiens oxysterol binding protein-like 7 (OSBPL7), transcript variant 1, mRNA.	NM_145798.2	0.46036	0.61545	1.32952	0.0139506	OSBPL7	0008202;0006869;0003676	steroid metabolism ;lipid transport ;nucleic acid binding	OSBPL7	150.256	162.689	217.179	215.898	215.466	257.672	257.272	250.799	211.239	425.736	226.114	405.161	278.44	376.911	216.235	354.381	281.353	289.1	225.101	275.091	425.736
1396305	ILMN_11580	TUBA8	Homo sapiens tubulin, alpha 8 (TUBA8), mRNA.	NM_018943.1	0.16255	0.26036	1.59287	0.0140986	TUBA8	0007018;0051258;000166;0005198;0003924;0005525;0005856;0043234;005874	microtubule-based movement ;protein polymerization ;nucleotide binding ;structural molecule activity ;GTPase activity ;GTP binding ;cytoskeleton ;protein complex ;microtubule	TUBA8	92.9958	95.6994	84.872	95.0572	69.6237	115.895	72.1846	94.4607	117.65	123.449	111.57	44.5554	182.32	180.45	93.9809	122.018	164.399	39.1058	23.5127	105.514	182.32
1395231	ILMN_12928	DUSP5	Homo sapiens dual specificity phosphatase 5 (DUSP5), mRNA.	NM_004419.3	1.19521	0.61876	-1.94232	0.0141894	DUSP5	0006470;0016787;0004725;0017017;0005634	protein amino acid dephosphorylation ;hydrolase activity ;protein tyrosine phosphatase activity ;MAP kinase phosphatase activity ;nucleus	DUSP5	509.537	394.106	523.496	899.914	508.847	260.938	556.365	271.621	312.33	314.902	245.897	457.639	291.669	324.068	297.551	312.436	294.044	1156.1	965.758	219.911	1156.1
1379569	ILMN_6390	ALDH3A1	Homo sapiens aldehyde dehydrogenase 3 family, memberA1 (ALDH3A1), mRNA.	NM_000691.3	0.05278	0.03319	-1.59904	0.0144417	ALDH3A1	0008152;0005975;0006081;0005489;0004030;0016491;0005829	metabolism ;carbohydrate metabolism ;aldehyde metabolism ;electron transporter activity ;aldehyde dehydrogenase [NAD(P)+] activity ;oxidoreductase activity ;cytosol	ALDH3A1	17.9814	24.919	12.557	23.9905	27.1046	33.2652	29.1035	38.8832	10.4734	34.4335	11.3861	2.20618	7.7244	16.1964	17.0382	20.176	9.92086	54.0505	21.724	38.7231	54.0505
1393932	ILMN_138970	MYL6	Homo sapiens myosin, light polypeptide 6, alkali, smooth muscle and non-muscle (MYL6), transcript variant 1, mRNA.	NM_021019.2	12.9428	10.7844	-1.2068	0.0144458	MYL6	0007519;0005509;0003774;0016459	myogenesis ;calcium ion binding ;motor activity ;myosin	MYL6	6580.63	7995.75	7078.63	7657.61	8657.3	7052.96	6842.92	7703.5	6614.18	6214.23	5758.44	6090.9	5939.28	6733.73	6131.98	5553.44	6048.36	7668.03	12284.6	6891.78	12284.6
1382886	ILMN_29107	TAF4	Homo sapiens TAF4 RNA polymerase II, TATA box binding protein (TBP)-associated factor, 135kDa (TAF4), mRNA.	NM_003185.2	0.55376	0.6972	1.25209	0.014469	TAF4	0006355;0006350;0006352;0016986;0016251;0003713;0005515;0003700;0005669;0005634	regulation of transcription DNA-dependent ;transcription ;transcription initiation ;transcription initiation factor activity ;general RNA polymerase II transcription factor activity ;transcription coactivator activity ;protein binding ;transcription factor activity ;transcription factor TFIID complex ;nucleus	TAF4	346.099	237.585	208.612	230.326	303.467	270.576	255.353	364.684	292.713	467.527	262.058	404.62	403.244	337.877	324.138	293.864	341.807	272.288	234.968	340.08	467.527
1390508	ILMN_18431	POLE	Homo sapiens polymerase (DNA directed), epsilon (POLE), mRNA.	NM_006231.2	0.69038	1.23387	1.77738	0.0144993	POLE	0006260;0006281;0046872;0003887;0008408;0016740;000166;0005515;0003677;0005634	DNA replication ;DNA repair ;metal ion binding ;DNA-directed DNA polymerase activity ;3'-5' exonuclease activity ;transferase activity ;nucleotide binding ;protein binding ;DNA binding ;nucleus	POLE	184.781	73.9682	218.274	365.183	369.122	408.922	321.966	430.29	231.332	998.093	303.49	751.542	1077.53	577.082	344.457	805.006	557.469	605.011	434.698	739.519	1077.53
1394122	ILMN_138708	ZCCHC14	Homo sapiens zinc finger, CCHC domain containing 14 (ZCCHC14), mRNA.	NM_015144.1	1.53008	1.86174	1.21005	0.0146197	ZCCHC14	0046872;0003676	metal ion binding ;nucleic acid binding	ZCCHC14	997.334	667.904	699.231	773.478	863.542	806.393	893.4	952.733	878.199	1146.04	799.69	968.094	1149.67	911.792	932.178	1125.18	822.708	778.839	529.778	1087.68	1149.67
1394770	ILMN_13590	NMNAT2	Homo sapiens nicotinamide nucleotide adenylyltransferase 2 (NMNAT2), transcript variant 2, mRNA.	NM_170706.2	0.04729	0.06346	1.33446	0.0146377	NMNAT2	0009435;0009058;000309;0016740	NAD biosynthesis ;biosynthesis ;nicotinamide-nucleotide adenylyltransferase activity ;transferase activity	NMNAT2	16.0458	18.5185	31.8386	27.1923	23.1976	22.6927	26.114	31.9593	25.5435	54.9898	28.2951	25.7754	25.059	30.305	24.3778	31.6621	27.1032	28.9448	31.4852	48.85	54.9898
1383873	ILMN_27545	FAM51A1	Homo sapiens family with sequence similarity 51, member A1 (FAM51A1), mRNA.	NM_017856.1	0.35837	0.45605	1.26556	0.0147772	FAM51A1	0006355;0006350;0046872;0008270;0003677;0005634	regulation of transcription DNA-dependent ;transcription ;metal ion binding ;zinc ion binding ;DNA binding ;nucleus	FAM51A1	120.974	170.578	135.038	135.28	188.95	186.908	179.582	200.749	200.58	214.833	202.256	240.459	173.238	256.433	233.214	170.907	198.877	249.551	170.466	317.848	317.848
1386937	ILMN_23274	SSR1	Homo sapiens signal sequence receptor, alpha (translocon-associated protein alpha) (SSR1), mRNA.	NM_003144.2	1.47273	1.24785	-1.18675	0.0147787	SSR1	0006613;0008284;0005509;0005048;0016020;0005783;0016021	cotranslational protein targeting to membrane ;positive regulation of cell proliferation ;calcium ion binding ;signal sequence binding ;membrane ;endoplasmic reticulum ;integral to membrane	SSR1	694.427	662.61	593.65	895.052	976.598	849.954	614.906	721.513	700.987	669.691	764.804	662.546	565.408	697.952	628.56	468.661	692.096	799.176	783.5	604.337	976.598
1385082	ILMN_25940	FLJ42177	Homo sapiens FLJ42177 protein (FLJ42177), mRNA.	NM_001001706.1	0.05415	0.08041	1.47672	0.0148192	FLJ42177	0007600;0007267;0007163;0007601;0005509;0016021	sensory perception ;cell-cell signaling ;establishment and/or maintenance of cell polarity ;visual perception ;calcium ion binding ;integral to membrane	FLJ42177	40.008	10.3626	27.9835	32.0762	29.3714	14.0649	19.7354	35.9918	34.8786	55.8602	33.5991	37.2568	50.1621	33.149	20.3091	36.9445	57.288	46.3006	40.2052	37.7796	57.288
1396665	ILMN_10992	QTRT1	Homo sapiens queuine tRNA-ribosyltransferase 1 (tRNA-guanine transglycosylase) (QTRT1), mRNA.	NM_031209.1	0.32602	0.43035	1.31272	0.0149419	QTRT1	0008616;0008033;0046872;0016757;0008270;0008479;0005840	queuosine biosynthesis ;tRNA processing ;metal ion binding ;transferase activity transferring glycosyl groups ;zinc ion binding ;queuine tRNA-ribosyltransferase activity ;ribosome	QTRT1	111.695	85.2905	169.585	131.548	152.151	202.452	210.39	170.082	131.901	266.503	184.843	267.944	177.175	182.052	212.687	251.05	238.158	210.666	138.437	181.194	267.944
1395358	ILMN_12893	KIAA1904	Homo sapiens KIAA1904 protein (KIAA1904), mRNA.	NM_052906.1	1.54069	2.01091	1.298	0.0150343	KIAA1904	9986	cell surface	KIAA1904	1011.54	924.369	752.826	885.377	549.13	774.363	1038.62	789.208	860.67	1175.22	687.646	794.711	1151.05	1011.01	1239.5	1154.96	1090.67	669.507	658.929	1462.19	1462.19
1389369	ILMN_20137	ARD1A	Homo sapiens ARD1 homolog A, N-acetyltransferase (S. cerevisiae) (ARD1A), mRNA.	NM_003491.2	1.18307	1.34778	1.13294	0.0151203	ARD1A	0006475;0006323;0007001;0006474;0016740;0008080;0005515;0043022;0005737;0005634	internal protein amino acid acetylation ;DNA packaging ;chromosome organization and biogenesis (sensu Eukaryota) ;N-terminal protein amino acid acetylation ;transferase activity ;N-acetyltransferase activity ;protein binding ;ribosome binding ;cytoplasm ;nucleus	ARD1A	586.099	557.62	575.766	709.036	681.289	676.801	632.465	475.949	644.436	805.998	651.349	669.161	694.486	709.761	655.212	825.393	617.911	574.576	586.474	721.778	825.393
1392591	ILMN_15634	CCL8	Homo sapiens chemokine (C-C motif) ligand 8 (CCL8), mRNA.	NM_005623.2	0.23138	0.0896	-2.59655	0.0151683	CCL8	0007267;0006935;0007165;0006816;0009615;0006887;0007600;0006954;0004871;0008009;0008201;0005615;00016020	cell-cell signaling ;chemotaxis ;signal transduction ;calcium ion transport ;response to virus ;exocytosis ;sensory perception ;inflammatory response ;signal transducer activity ;chemokine activity ;heparin binding ;extracellular space ;membrane	CCL8	53.3745	98.8036	109.969	88.0106	86.5718	53.3614	59.4076	85.222	29.8145	69.1682	58.8422	49.3919	37.2216	23.5791	39.7894	33.2326	25.1543	182.47	298.274	75.3627	298.274
1381024	ILMN_437	TAP2	Homo sapiens transporter 2, ATP-binding cassette, sub-family B (MDR/TAP) (TAP2), transcript variant 2, mRNA.	NM_018833.2	0.05975	0.03932	-1.52805	0.0152294	TAP2	0006886;0046967;0015833;0006857;0048004;0006955;0019885;0006461;0046982;000166;0042288;0005524;0042605;0015433;0046980;0015198;0042626;0016887;0005215;0004409;0042301;0005829;0042825;0005788;00016021	intracellular protein transport ;cytosol to ER transport ;peptide transport ;oligopeptide transport ;antigen presentation endogenous peptide antigen ;immune response ;antigen processing endogenous antigen via MHC class I ;protein complex assembly ;protein heterodimerization activity ;nucleotide binding ;MHC class I protein binding ;ATP binding ;peptide antigen binding ;peptide antigen-transportin…	TAP2	13.6126	17.1287	36.899	28.2845	29.5178	26.3316	18.9189	43.5247	12.1351	18.9545	20.2938	13.3651	24.5338	20.0211	31.1427	16.0604	18.7841	65.8254	50.7863	19.7375	65.8254
1390967	ILMN_17792	AIF1	Homo sapiens allograft inflammatory factor 1 (AIF1), transcript variant 3, mRNA.	NM_001623.3	0.9926	0.39894	-2.50186	0.0152381	AIF1	0007050;0008285;0006954;0006950;0005509;0005634	cell cycle arrest ;negative regulation of cell proliferation ;inflammatory response ;response to stress ;calcium ion binding ;nucleus	AIF1	150.235	305.976	577.579	249.745	859.515	1156.05	287.388	161.375	111.4	392.18	217.136	187.686	246.215	303.502	225.72	33.6895	184.917	763.309	540.428	65.5793	1156.05
1385662	ILMN_24995	MRPL27	Homo sapiens mitochondrial ribosomal protein L27 (MRPL27), nuclear gene encoding mitochondrial protein, transcript variant 3, mRNA.	NM_148570.1	0.05756	0.0782	1.35107	0.015243	MRPL27	0006412;0003735;0005762;0005739;0005622;0005840	protein biosynthesis ;structural constituent of ribosome ;mitochondrial large ribosomal subunit ;mitochondrion ;intracellular ;ribosome	MRPL27	24.702	18.4101	37.4094	26.2265	31.1851	21.6359	26.5489	41.3192	24.5316	56.7603	28.4345	39.0884	36.7584	46.453	22.5489	38.6469	32.7269	35.1371	53.8171	66.1078	66.1078
1385276	ILMN_25563	KLRF1	Homo sapiens killer cell lectin-like receptor subfamily F, member 1 (KLRF1), mRNA.	NM_016523.1	0.04172	0.02575	-1.62892	0.0154053	KLRF1	0007166;0019735;0030106;0005529;0016020;0005887	cell surface receptor linked signal transduction ;antimicrobial humoral response (sensu Vertebrata) ;MHC class I receptor activity ;sugar binding ;membrane ;integral to plasma membrane	KLRF1	6.5107	16.677	22.898	24.0047	11.0466	17.3964	24.5414	35.4487	14.0303	5.19137	17.8028	15.5761	4.35755	9.8881	10.6303	7.75282	12.6905	19.0849	52.4564	19.1825	52.4564
1390155	ILMN_19032	AMID	Homo sapiens apoptosis-inducing factor (AIF)-like mitochondrion-associated inducer of death (AMID), mRNA.	NM_032797.4	0.08245	0.10697	1.29028	0.0154862	AMID	0006917;0008152;0030261;0008637;0006118;0015036;0004174;0005829;0005741	induction of apoptosis ;metabolism ;chromosome condensation ;apoptotic mitochondrial changes ;electron transport ;disulfide oxidoreductase activity ;electron-transferring-flavoprotein dehydrogenase activity ;cytosol ;mitochondrial outer membrane	AMID	36.4074	29.8366	38.431	37.386	29.4918	38.0086	44.3792	57.3962	34.0147	69.6862	26.5982	46.3608	50.9474	45.2728	57.322	61.5529	52.0667	56.2112	71.0077	74.1817	74.1817
1382155	ILMN_30111	FLG	Homo sapiens filaggrin (FLG), mRNA.	NM_002016.1	0.0247	0.03992	1.60706	0.0155041	FLG	0030154;0007275;0005509;0005198;0005856;0016023;0005882	cell differentiation ;development ;calcium ion binding ;structural molecule activity ;cytoskeleton ;cytoplasmic membrane-bound vesicle ;intermediate filament	FLG	6.6246	10.2623	7.21642	13.8095	11.1965	10.0756	11.0496	20.1341	16.0403	18.0789	11.7181	12.8454	19.8833	23.9958	9.94841	25.5169	15.6019	24.2549	11.0315	51.8472	51.8472
1395171	ILMN_13064	BCAN	Homo sapiens brevican (BCAN), transcript variant 2, mRNA.	NM_198427.1	0.83283	1.05356	1.25807	0.015523	BCAN	0007155;0005540;0005529;0016020	cell adhesion ;hyaluronic acid binding ;sugar binding ;membrane	BCAN	415.7	462.282	515.192	341.538	324.395	365.378	480.666	375.848	374.521	710.114	468.322	615.698	544.522	517.613	521.056	432.402	514.117	519.573	377.34	676.262	710.114
1394065	ILMN_138577	CPVL	Homo sapiens carboxypeptidase, vitellogenic-like (CPVL), transcript variant 1, mRNA.	NM_031311.2	0.20262	0.10757	-1.89405	0.015582	CPVL	0006508;0004185;0008233	proteolysis and peptidolysis ;serine carboxypeptidase activity ;peptidase activity	CPVL	50.1055	51.3777	81.1171	120.57	143.056	173.643	52.6225	57.271	37.2599	115.011	51.1887	45.1503	73.6596	60.208	43.0457	34.2422	19.5982	156.352	123.824	38.1034	173.643
1377274	ILMN_9413	HIF1AN	Homo sapiens hypoxia-inducible factor 1, alpha subunit inhibitor (HIF1AN), mRNA.	NM_017902.1	0.48316	0.59293	1.22043	0.0156898	HIF1AN	0006355;0006350;0046872;0004597;0016491;0016702;0005506;0005634	regulation of transcription DNA-dependent ;transcription ;metal ion binding ;peptide-aspartate beta-dioxygenase activity ;oxidoreductase activity ;oxidoreductase activity acting on single donors with incorporation of molecular oxygen incorporation of two atoms of oxygen ;iron ion binding ;nucleus	HIF1AN	207.741	235.01	222.711	193.674	265.643	268.7	303.38	268.089	256.619	320.621	278.494	199.702	330.035	343.115	328.93	330.037	306.347	225.336	178.398	236.062	343.115
1384743	ILMN_26327	KLHDC6	Homo sapiens kelch domain containing 6 (KLHDC6), mRNA.	NM_207335.1	0.12556	0.17281	1.36867	0.0157709	KLHDC6	0007165;0007169;0006468;000166;0004872;0016740;0004674;0005524;0005003;0016020;0005887	signal transduction ;transmembrane receptor protein tyrosine kinase signaling pathway ;protein amino acid phosphorylation ;nucleotide binding ;receptor activity ;transferase activity ;protein serine/threonine kinase activity ;ATP binding ;ephrin receptor activity ;membrane ;integral to plasma membrane	KLHDC6	58.9223	34.8681	45.1624	39.3314	92.2015	60.7135	88.6214	74.2693	84.1775	78.944	55.0628	78.2056	77.4169	83.0474	84.0118	83.0669	83.2419	92.5964	42.9238	112.823	112.823
1380771	ILMN_4688	CCDC15	Homo sapiens coiled-coil domain containing 15 (CCDC15), mRNA.	NM_025004.1	0.04254	0.02883	-1.48385	0.015861	CCDC15	5515	protein binding	CCDC15	22.6944	21.0312	15.8077	11.5809	13.5719	17.4286	21.046	30.3013	13.4575	10.7259	20.1911	12.2639	10.4229	14.9594	9.68926	13.7359	14.2904	26.7927	56.2954	16.3619	56.2954
1388584	ILMN_21229	THAP3	Homo sapiens THAP domain containing, apoptosis associated protein 3 (THAP3), mRNA.	NM_138350.2	0.0561	0.03664	-1.53953	0.0159213	THAP3	0046872;0003677	metal ion binding ;DNA binding	THAP3	24.1599	20.8759	34.1889	17.7894	29.0342	26.4183	17.8632	46.7482	20.4423	14.1756	17.8038	16.9683	16.6225	12.6267	22.8815	14.2817	21.1577	63.4479	22.6606	24.391	63.4479
1395566	ILMN_12514	LAP3	Homo sapiens leucine aminopeptidase 3 (LAP3), mRNA.	NM_015907.2	1.45558	0.98598	-1.48446	0.0159558	LAP3	0019538;0006508;0030145;0008233;000287;0004178;0016804;0008270;0005737	protein metabolism ;proteolysis and peptidolysis ;manganese ion binding ;peptidase activity ;magnesium ion binding ;leucyl aminopeptidase activity ;prolyl aminopeptidase activity ;zinc ion binding ;cytoplasm	LAP3	598.987	729.014	899.623	657.569	1232.47	967.06	555.429	546.43	587.493	322.298	741.618	851.499	322.998	548.237	405.075	182.26	473.45	471.36	856.18	591.225	1232.47
1378688	ILMN_7613	GFPT2	Homo sapiens glutamine-fructose-6-phosphate transaminase 2 (GFPT2), mRNA.	NM_005110.1	0.97473	1.27464	1.30048	0.0159872	GFPT2	0016051;0008152;0006541;0006002;0006112;0005975;0016740;0004360;0005529;0005737	carbohydrate biosynthesis ;metabolism ;glutamine metabolism ;fructose 6-phosphate metabolism ;energy reserve metabolism ;carbohydrate metabolism ;transferase activity ;glutamine-fructose-6-phosphate transaminase (isomerizing) activity ;sugar binding ;cytoplasm	GFPT2	594.67	339.492	363.428	596.593	727.665	563.488	649.856	494.607	604.505	692.59	465.228	805.994	540.59	681.927	576.795	797.238	769.153	315.074	334.237	656.846	805.994
1392733	ILMN_15383	MGC40499	Homo sapiens PRotein Associated with Tlr4 (MGC40499), mRNA.	NM_152755.1	0.29662	0.36727	1.23135	0.015988	MGC40499	0045449;0005515;0003677;0005634	regulation of transcription ;protein binding ;DNA binding ;nucleus	MGC40499	109.26	103.023	105.737	126.761	165.885	149.829	151.159	186.828	157.451	213.706	136.293	209.423	135.71	178.755	172.378	173.568	162.618	184.815	151.096	219.415	219.415
1384005	ILMN_27277	IL1B	Homo sapiens interleukin 1, beta (IL1B), mRNA.	NM_000576.2	0.28494	0.09572	-2.99329	0.016009	IL1B	0008283;0007267;0007165;0001660;0006915;0008285;00074;0019735;0004871;0005149;0005615	cell proliferation ;cell-cell signaling ;signal transduction ;fever ;apoptosis ;negative regulation of cell proliferation ;regulation of cell cycle ;antimicrobial humoral response (sensu Vertebrata) ;signal transducer activity ;interleukin-1 receptor binding ;extracellular space	IL1B	70.9995	39.1112	218.834	34.5588	287.702	219.359	60.7904	39.7408	38.6328	46.2241	35.6703	43.3299	61.9418	49.1202	56.8859	33.497	46.6098	267.322	173.767	56.6033	287.702
1381415	ILMN_3779	STX11	Homo sapiens syntaxin 11 (STX11), mRNA.	NM_003764.2	0.09064	0.04392	-2.07518	0.0161623	STX11	0006886;0006944;0008565;0005515;0005484;0016020;0005795	intracellular protein transport ;membrane fusion ;protein transporter activity ;protein binding ;SNAP receptor activity ;membrane ;Golgi stack	STX11	30.3494	14.7926	68.3364	30.7684	50.0533	38.4895	26.3041	58.3427	16.3275	14.8543	18.865	28.786	31.4685	30.7093	13.1091	18.0297	9.96689	40.3295	116.231	39.5853	116.231
1378182	ILMN_8217	EIF2C1	Homo sapiens eukaryotic translation initiation factor 2C, 1 (EIF2C1), mRNA.	NM_012199.2	0.5288	0.61051	1.14815	0.0162053	EIF2C1	0006446;0006412;0005515;0003743;0005850	regulation of translational initiation ;protein biosynthesis ;protein binding ;translation initiation factor activity ;eukaryotic translation initiation factor 2 complex	EIF2C1	212.836	276.817	250.735	271.811	239.594	248.393	256.552	260.596	282.903	278.268	263.998	385.232	323.042	290.847	268.108	371.366	288.877	299.721	267.001	271.966	385.232
1394015	ILMN_138821	ZNF137	Homo sapiens zinc finger protein 137 (clone pHZ-30) (ZNF137), mRNA.	NM_003438.1	0.08127	0.11727	1.43504	0.0162452	ZNF137	0006355;0006350;0046872;0008270;0003700;0005634	regulation of transcription DNA-dependent ;transcription ;metal ion binding ;zinc ion binding ;transcription factor activity ;nucleus	ZNF137	55.0151	24.4118	14.8573	29.9458	47.2716	57.4884	41.4643	60.5832	58.8309	72.105	32.0442	69.6846	59.2796	62.0248	54.8665	59.2558	48.9183	42.9779	46.3394	48.5858	72.105
1387829	ILMN_22138	OR2A14	Homo sapiens olfactory receptor, family 2, subfamily A, member 14 (OR2A14), mRNA.	NM_001001659.1	0.07695	0.0577	-1.34098	0.0163281	OR2A14	0007600;0007165;0007186;0007608;0004984;0004872;0016021	sensory perception ;signal transduction ;G-protein coupled receptor protein signaling pathway ;sensory perception of smell ;olfactory receptor activity ;receptor activity ;integral to membrane	OR2A14	29.6255	33.2791	56.8471	45.5641	29.9039	38.8669	35.753	53.9187	20.9423	33.5101	22.8663	27.6307	31.8753	23.2832	30.8465	35.3303	35.2897	43.9311	38.0051	30.5554	56.8471
1395402	ILMN_12727	ADAM19	Homo sapiens ADAM metallopeptidase domain 19 (meltrin beta) (ADAM19), transcript variant 2, mRNA.	NM_033274.2	0.84581	1.09381	1.28608	0.0163874	ADAM19	0006508;0004222;0046872;0008270;0016021	proteolysis and peptidolysis ;metalloendopeptidase activity ;metal ion binding ;zinc ion binding ;integral to membrane	ADAM19	467.346	459.908	407.876	710.72	420.293	313.723	578.756	370.603	601.219	463.744	553.513	556.852	492.25	594.998	521.188	631.995	644.061	335.312	238.668	553.944	710.72
1383431	ILMN_2829	OAS1	Homo sapiens 2',5'-oligoadenylate synthetase 1, 40/46kDa (OAS1), transcript variant 2, mRNA.	NM_002534.2	0.18347	0.14145	-1.3043	0.0164049	OAS1	0006139;0006955;0009615;0016740;0003723;0016779;0005524;0005737	nucleobase nucleoside nucleotide and nucleic acid metabolism ;immune response ;response to virus ;transferase activity ;RNA binding ;nucleotidyltransferase activity ;ATP binding ;cytoplasm	OAS1	71.1585	80.4094	62.2393	61.3541	77.235	77.6492	83.0686	103.825	53.9006	63.916	69.2462	63.0237	54.2535	72.9048	74.9101	74.4023	62.6609	136.314	138.969	88.7027	138.969
1387297	ILMN_22879	ARHGAP9	Homo sapiens Rho GTPase activating protein 9 (ARHGAP9), mRNA.	NM_032496.1	0.48463	0.35843	-1.35958	0.0164565	ARHGAP9	5096	GTPase activator activity	ARHGAP9	263.704	196.056	282.867	227.94	290.741	334.682	153.498	218.595	173.2	219.051	221.597	149.676	202.497	197.305	148.581	104.069	192.181	281.477	138.455	125.886	334.682
1392686	ILMN_1554	PRPSAP1	Homo sapiens phosphoribosyl pyrophosphate synthetase-associated protein 1 (PRPSAP1), mRNA.	NM_002766.1	3.04513	3.49518	1.14147	0.0165046	PRPSAP1	0009116;0009165;0004857;0004749	nucleoside metabolism ;nucleotide biosynthesis ;enzyme inhibitor activity ;ribose phosphate diphosphokinase activity	PRPSAP1	1698.83	1642.29	1698.38	1910.5	1855.87	1810.72	1842.68	1387.04	2096.37	1957.5	1983.89	2048.9	1787.75	1933.87	1631.8	1651.66	1881.7	1189.98	1362.99	1834.47	2096.37
1386794	ILMN_23515	CHI3L1	Homo sapiens chitinase 3-like 1 (cartilage glycoprotein-39) (CHI3L1), mRNA.	NM_001276.1	0.04734	0.02942	-1.61795	0.0165298	CHI3L1	0006032;0005975;0004553;0005201;0005529;0004568;0005615;0005578	chitin catabolism ;carbohydrate metabolism ;hydrolase activity hydrolyzing O-glycosyl compounds ;extracellular matrix structural constituent ;sugar binding ;chitinase activity ;extracellular space ;extracellular matrix (sensu Metazoa)	CHI3L1	34.4693	13.825	21.3826	14.6875	17.6474	32.1972	12.8702	25.9054	12.0219	23.88	22.9654	4.56698	17.9202	11.4468	14.2846	7.40894	5.85233	32.1834	54.9682	20.9391	54.9682
1382128	ILMN_30071	FLJ13096	Homo sapiens hypothetical protein FLJ13096 (FLJ13096), mRNA.	NM_025000.1	0.04718	0.02976	-1.59403	0.0166022	FLJ13096	0019642;0006100;0016491;0004459;0005737	anaerobic glycolysis ;tricarboxylic acid cycle intermediate metabolism ;oxidoreductase activity ;L-lactate dehydrogenase activity ;cytoplasm	FLJ13096	26.7162	6.40067	19.8609	23.9809	20.4829	18.0338	21.5513	31.6037	21.1482	14.6179	21.2131	16.8544	15.3954	5.82348	10.9722	15.0429	15.2748	54.6245	40.4721	-1.08993	54.6245
1396886	ILMN_10852	APEG1	Homo sapiens aortic preferentially expressed gene 1 (APEG1), mRNA.	NM_005876.3	0.7653	0.93342	1.21297	0.0166147	APEG1	0007517;0008285;0006468;000166;0004872;0016740;0004674;0005524;0004713;0016021;0005634	muscle development ;negative regulation of cell proliferation ;protein amino acid phosphorylation ;nucleotide binding ;receptor activity ;transferase activity ;protein serine/threonine kinase activity ;ATP binding ;protein-tyrosine kinase activity ;integral to membrane ;nucleus	APEG1	467.465	348.972	338.498	422.141	421.056	370.95	422.518	337.538	374.323	450.363	363.385	491.146	452.553	520.732	451.616	630.301	461.665	453.785	265.977	533.553	630.301
1388598	ILMN_2104	FGL1	Homo sapiens fibrinogen-like 1 (FGL1), transcript variant 4, mRNA.	NM_201553.1	0.03564	0.05533	1.54404	0.0166427	FGL1	5577	fibrinogen complex	FGL1	13.0846	19.8925	11.9748	13.5569	7.55415	8.09532	27.9891	15.1403	11.7753	25.5081	35.9919	30.3322	17.1162	23.678	25.542	34.2037	33.0977	50.2554	28.3194	43.2107	50.2554
1384555	ILMN_26511	BTBD8	Homo sapiens BTB (POZ) domain containing 8 (BTBD8), mRNA.	NM_183242.1	0.0765	0.12193	1.58496	0.0166831	BTBD8	5515	protein binding	BTBD8	23.4307	23.0592	35.0047	54.524	38.5999	67.2385	53.1398	43.9892	79.8247	54.8911	47.9838	43.4608	50.7159	88.2637	54.7492	50.7778	74.0861	23.57	30.2156	46.4125	88.2637
1395750	ILMN_12342	PLEKHA8	Homo sapiens pleckstrin homology domain containing, family A (phosphoinositide binding specific) member 8 (PLEKHA8), mRNA.	NM_032639.2	0.05207	0.03085	-1.69703	0.0167312	PLEKHA8	0045204;0006470;0045209;000188;0016787;0017017;0005737;0005634	MAPK export from nucleus ;protein amino acid dephosphorylation ;MAPK phosphatase export from nucleus leptomycin B sensitive ;inactivation of MAPK activity ;hydrolase activity ;MAP kinase phosphatase activity ;cytoplasm ;nucleus	PLEKHA8	31.6628	26.2359	21.9468	14.1465	20.0416	19.8626	11.2171	34.8195	10.2558	37.503	22.7156	9.53028	-1.22126	11.1752	8.16527	24.6459	8.06103	46.4999	62.0822	17.1421	62.0822
1392201	ILMN_16206	PLA2G2E	Homo sapiens phospholipase A2, group IIE (PLA2G2E), mRNA.	NM_014589.1	0.0674	0.05144	-1.31735	0.0167602	PLA2G2E	0016042;0006644;0006954;0004623;0005509;0016787;0005576	lipid catabolism ;phospholipid metabolism ;inflammatory response ;phospholipase A2 activity ;calcium ion binding ;hydrolase activity ;extracellular region	PLA2G2E	32.2765	27.3073	39.2331	31.3004	22.4827	33.3402	38.8304	36.0259	27.7319	26.5518	10.4114	21.2341	23.757	23.5007	27.458	27.662	38.9508	61.1626	41.8287	34.7951	61.1626
1389154	ILMN_20272	C16orf53	Homo sapiens chromosome 16 open reading frame 53 (C16orf53), mRNA.	NM_024516.2	0.22938	0.28421	1.2322	0.0167652	C16orf53	0006355;0008270;0005515	regulation of transcription DNA-dependent ;zinc ion binding ;protein binding	C16orf53	99.8955	80.0575	111.528	94.5847	126.722	156.405	126.122	121.907	124.581	177.343	108.755	143.003	134.016	117.807	137.743	136.474	116.091	91.6291	111.916	153.19	177.343
1394090	ILMN_138633	ITGAM	Homo sapiens integrin, alpha M (complement component receptor 3, alpha; also known as CD11b (p170), macrophage antigen alpha polypeptide) (ITGAM), mRNA.	NM_000632.2	0.20483	0.10786	-1.90967	0.0168128	ITGAM	0007160;0007155;0007229;000287;0005515;0004872;0005509;0016021;0008305	cell-matrix adhesion ;cell adhesion ;integrin-mediated signaling pathway ;magnesium ion binding ;protein binding ;receptor activity ;calcium ion binding ;integral to membrane ;integrin complex	ITGAM	48.1288	63.7087	127.227	80.6527	186.894	185.246	62.9247	60.7974	41.3897	86.4366	65.8997	31.7593	72.2263	59.8897	60.3016	18.9431	48.1936	105.272	105.253	31.0388	186.894
1380173	ILMN_5422	DOK4	Homo sapiens docking protein 4 (DOK4), mRNA.	NM_018110.2	0.30442	0.38639	1.26225	0.0168178	DOK4	5158	insulin receptor binding	DOK4	113.158	116.234	165.992	154.651	133.853	159.381	226.7	161.764	150.892	219.903	134.016	145.598	182.185	196.506	203.377	218.081	208.201	131.213	120.636	200.052	226.7
1397196	ILMN_10407	SFRS14	Homo sapiens splicing factor, arginine/serine-rich 14 (SFRS14), transcript variant 2, mRNA.	NM_014884.1	5.5649	6.66742	1.19152	0.0168446	SFRS14	000398;0003723;0005634	nuclear mRNA splicing via spliceosome ;RNA binding ;nucleus	SFRS14	3149.25	3058.71	3294.45	3285.97	3736.77	3705.55	3921.58	2681.45	3607.4	3618.4	3572.94	3332.63	4474.41	3822.87	3394.78	4519.81	3825.82	2434.67	1850.16	3278.87	4519.81
1377471	ILMN_9226	RUTBC1	Homo sapiens RUN and TBC1 domain containing 1 (RUTBC1), mRNA.	NM_014853.1	8.60769	10.3427	1.19494	0.0168916	RUTBC1	0006812;0006813;0030955;0005249;0005515;0005624;0016020;0016021;0008076	cation transport ;potassium ion transport ;potassium ion binding ;voltage-gated potassium channel activity ;protein binding ;membrane fraction ;membrane ;integral to membrane ;voltage-gated potassium channel complex	RUTBC1	5592.86	4524.91	4091.83	5164.41	4658.73	5452.57	6749.84	5035.92	5014.91	6222.6	4400.3	5257.4	6618.83	5126.3	6766.89	7071.29	5912.81	5030.23	4002.12	7595.29	7595.29
1392714	ILMN_1536	NVL	Homo sapiens nuclear VCP-like (NVL), transcript variant 1, mRNA.	NM_002533.2	0.19827	0.23928	1.20022	0.0170363	NVL	000166;0005524;0005634	nucleotide binding ;ATP binding ;nucleus	NVL	81.6824	77.6678	89.5988	79.8252	114.749	102.578	109.016	115.941	133.416	92.4531	104.417	113.651	90.7936	143.666	92.5739	128.076	113.537	95.0668	101.898	128.466	143.666
1376940	ILMN_9886	PTPN6	Homo sapiens protein tyrosine phosphatase, non-receptor type 6 (PTPN6), transcript variant 3, mRNA.	NM_080549.2	0.12638	0.06433	-1.97546	0.0171059	PTPN6	0006915;0007186;0008285;0007242;0006470;0016787;0005515;0004725;0016020;0005856	apoptosis ;G-protein coupled receptor protein signaling pathway ;negative regulation of cell proliferation ;intracellular signaling cascade ;protein amino acid dephosphorylation ;hydrolase activity ;protein binding ;protein tyrosine phosphatase activity ;membrane ;cytoskeleton	PTPN6	38.1705	28.1229	54.2448	37.8154	86.471	103.571	38.2602	44.0224	19.4307	48.1202	26.4819	38.4555	36.7129	43.6116	32.5585	15.5949	28.4096	132.874	82.0589	31.9848	132.874
1392701	ILMN_15559	C21orf42	Homo sapiens chromosome 21 open reading frame 42 (C21orf42), mRNA.	NM_058184.1	0.05487	0.07753	1.40518	0.0171283	C21orf42	0006355;0006350;0003677;0005634	regulation of transcription DNA-dependent ;transcription ;DNA binding ;nucleus	C21orf42	29.2995	13.9044	10.0628	14.928	32.1122	34.4566	41.3829	44.3575	22.3667	39.5128	30.0938	50.7973	46.9426	40.8633	38.7136	41.6305	34.8664	34.1251	42.1979	40.0433	50.7973
1393686	ILMN_14007	CTSC	Homo sapiens cathepsin C (CTSC), transcript variant 1, mRNA.	NM_001814.2	0.23772	0.12972	-1.84274	0.0171507	CTSC	0006955;0006508;0004197;0004214;0005764	immune response ;proteolysis and peptidolysis ;cysteine-type endopeptidase activity ;dipeptidyl-peptidase I activity ;lysosome	CTSC	98.4682	45.1717	90.238	88.0189	215.11	198.243	51.915	92.8872	46.0557	100.247	61.5924	50.3147	52.7298	60.8181	45.6332	50.5928	65.753	111.784	177.668	91.4761	215.11
1393645	ILMN_14179	DNAJB11	Homo sapiens DnaJ (Hsp40) homolog, subfamily B, member 11 (DNAJB11), mRNA.	NM_016306.4	2.85514	2.41571	-1.18846	0.017188	DNAJB11	0006457;0031072;0051082;0005783	protein folding ;heat shock protein binding ;unfolded protein binding ;endoplasmic reticulum	DNAJB11	1518.86	1451.74	1380.78	1747.41	1892.21	1734.36	1351.89	1412.34	1530.54	1052.98	1424.29	1322.28	1012.1	1370.1	1208.35	1047.18	1208.88	1315.44	1497.2	1673.32	1892.21
1395260	ILMN_12965	C1orf92	Homo sapiens chromosome 1 open reading frame 92 (C1orf92), mRNA.	NM_144702.1	0.11102	0.08087	-1.38037	0.0172159	C1orf92	0004;0003676;0008372	biological process unknown ;nucleic acid binding ;cellular component unknown	C1orf92	41.2016	52.4908	41.9639	50.0145	43.4641	44.2097	51.7459	56.9632	32.0431	31.3124	28.4781	35.4271	42.4547	38.247	29.4559	48.9522	47.1402	107.63	80.6403	69.2722	107.63
1394127	ILMN_138334	GADD45B	Homo sapiens growth arrest and DNA-damage-inducible, beta (GADD45B), mRNA.	NM_015675.1	1.56589	0.53605	-2.93736	0.0172582	GADD45B	000185;0006915;0030154;0006950	activation of MAPKKK activity ;apoptosis ;cell differentiation ;response to stress	GADD45B	2023.21	204.99	512.204	259.38	883.85	946.298	480.354	258.29	180.589	270.426	213.898	531.73	170.082	313.584	197.39	349.667	211.732	965.517	1596.77	205.224	2023.21
1382108	ILMN_3004	NCOA5	Homo sapiens nuclear receptor coactivator 5 (NCOA5), mRNA.	NM_020967.2	0.63855	0.8229	1.28159	0.0173189	NCOA5	0006355;0006412;0006350;0004812;0005524;0005634	regulation of transcription DNA-dependent ;protein biosynthesis ;transcription ;aminoacyl-tRNA ligase activity ;ATP binding ;nucleus	NCOA5	346.774	306.454	305.574	315.258	317.914	375.414	293.446	394.882	351.008	490.883	350.827	409.41	658.205	378.459	368.962	390.73	363.908	302.154	218.024	376.901	658.205
1397387	ILMN_1003	P2RY5	Homo sapiens purinergic receptor P2Y, G-protein coupled, 5 (P2RY5), mRNA.	NM_005767.3	0.36769	0.21363	-1.7307	0.0173953	P2RY5	0007165;0007186;0001584;0045028;0004872;0016021	signal transduction ;G-protein coupled receptor protein signaling pathway ;rhodopsin-like receptor activity ;purinergic nucleotide receptor activity G-protein coupled ;receptor activity ;integral to membrane	P2RY5	83.9852	75.1033	137.264	178.826	242.279	200.6	123.013	121.548	74.5603	106.74	128.106	100.316	119.803	103.995	105.036	58.2823	95.9355	338.511	279.661	124.493	338.511
1377887	ILMN_8708	KIAA0141	Homo sapiens KIAA0141 (KIAA0141), mRNA.	NM_014773.2	0.354	0.42728	1.20034	0.0173959	KIAA0141	0005488;0005739	binding ;mitochondrion	KIAA0141	122.791	138.037	163.268	176.898	214.906	161.12	195.487	140.676	215.331	242.657	199.045	232.812	174.009	243.656	182.604	131.802	219.835	215.476	188.661	227.863	243.656
1391989	ILMN_16578	EXT2	Homo sapiens exostoses (multiple) 2 (EXT2), transcript variant 1, mRNA.	NM_000401.2	0.30048	0.34315	1.1357	0.0174316	EXT2	0007165;0001501;0007049;0045786;0006024;0016757;0050509;0005789;0016021;0005795;00016020	signal transduction ;skeletal development ;cell cycle ;negative regulation of progression through cell cycle ;glycosaminoglycan biosynthesis ;transferase activity transferring glycosyl groups ;N-acetylglucosaminyl-proteoglycan 4-beta-glucuronosyltransferase activity ;endoplasmic reticulum membrane ;integral to membrane ;Golgi stack ;membrane	EXT2	153.713	136.978	133.636	139.393	170.943	132.316	113.426	156.341	171.85	145.089	143.221	157.41	155.259	190.032	159.759	140.419	193.328	162.249	156.32	190.487	193.328
1378313	ILMN_7971	ASXL2	Homo sapiens additional sex combs like 2 (Drosophila) (ASXL2), mRNA.	NM_018263.3	1.13006	1.34681	1.18523	0.017437	ASXL2	46872	metal ion binding	ASXL2	524.063	741.339	589.422	646.585	636.386	635.135	610.188	443.764	797.375	684.777	704.588	778.379	720.839	694.412	607.311	488.706	687.996	557.874	406.186	825.576	825.576
1382315	ILMN_29882	IPO9	Homo sapiens importin 9 (IPO9), mRNA.	NM_018085.3	0.56645	0.68414	1.20111	0.0175018	IPO9	00059;0015031;0008565;0005643;0005737;0005634	protein-nucleus import docking ;protein transport ;protein transporter activity ;nuclear pore ;cytoplasm ;nucleus	IPO9	272.68	329.627	401.938	275.907	273.288	286.152	336.777	227.948	333.838	361.805	350.901	333.161	337.247	315.617	378.257	328.271	354.806	202.201	208.356	312.382	401.938
1384651	ILMN_26434	C1orf21	Homo sapiens chromosome 1 open reading frame 21 (C1orf21), mRNA.	NM_030806.3	2.53393	3.15996	1.24018	0.0175997	C1orf21	0006334;0005634	nucleosome assembly ;nucleus	C1orf21	1857.09	1432.7	1232.28	1456.07	1574.98	1343.91	1835.5	1365.19	1602.76	1501.43	1436.78	1522.13	2056.1	1640.47	1743.77	2074.15	1961.46	916.241	677.116	1491.81	2074.15
1387452	ILMN_2268	TSC1	Homo sapiens tuberous sclerosis 1 (TSC1), transcript variant 1, mRNA.	NM_000368.3	0.86063	1.08104	1.24919	0.0176935	TSC1	0007266;0007155;0045786	Rho protein signal transduction ;cell adhesion ;negative regulation of progression through cell cycle	TSC1	384.217	461.877	533.114	493.769	518.036	497.502	577.573	402.144	573.549	475.158	488.875	605.107	648.825	624.614	560.27	573.984	609.841	248.721	256.33	389.562	648.825
1379736	ILMN_6173	ATRN	Homo sapiens attractin (ATRN), transcript variant 2, mRNA.	NM_139322.1	0.09308	0.07075	-1.32287	0.0177384	ATRN	0006954;0007275;0005198;0004872;0005529;0005615;0016020;0005887;0005886	inflammatory response ;development ;structural molecule activity ;receptor activity ;sugar binding ;extracellular space ;membrane ;integral to plasma membrane ;plasma membrane	ATRN	29.8657	50.9964	46.0971	57.7259	41.9841	54.0735	31.298	43.4605	37.0048	36.232	43.4204	33.7577	23.1267	29.7643	37.1749	34.8808	35.4937	62.3555	67.727	42.742	67.727
1391957	ILMN_16537	C9orf21	Homo sapiens chromosome 9 open reading frame 21 (C9orf21), mRNA.	NM_153698.1	0.23347	0.17517	-1.34016	0.0177492	C9orf21	5086	ARF guanyl-nucleotide exchange factor activity	C9orf21	101.817	62.9858	85.4224	104.921	160.89	121.781	78.5519	100.854	69.6068	80.7233	94.3292	95.3996	66.1742	82.5023	86.9681	80.0485	84.6801	143.108	175.819	96.2775	175.819
1396869	ILMN_10832	BAX	Homo sapiens BCL2-associated X protein (BAX), transcript variant beta, mRNA.	NM_004324.3	0.0767	0.05654	-1.36407	0.017841	BAX	0008634;0008637;0006915;0006917;0007049;0008624;0007281;0045786;0042981;0005515;0016020;0016021	negative regulation of survival gene product activity ;apoptotic mitochondrial changes ;apoptosis ;induction of apoptosis ;cell cycle ;induction of apoptosis by extracellular signals ;germ cell development ;negative regulation of progression through cell cycle ;regulation of apoptosis ;protein binding ;membrane ;integral to membrane	BAX	42.5509	31.3219	21.5367	29.9166	40.2112	34.5526	30.8511	40.8417	28.1956	22.8682	18.4296	32.493	25.7231	27.1679	17.6203	31.0557	36.4851	63.0591	74.973	47.2157	74.973
1383566	ILMN_28024	DDX17	Homo sapiens DEAD (Asp-Glu-Ala-Asp) box polypeptide 17 (DDX17), transcript variant 2, mRNA.	NM_030881.2	5.24607	6.17172	1.16996	0.0179554	DDX17	0006396;000166;0003723;0008186;0003724;0016787;0005524;0008026;0005634	RNA processing ;nucleotide binding ;RNA binding ;RNA-dependent ATPase activity ;RNA helicase activity ;hydrolase activity ;ATP binding ;ATP-dependent helicase activity ;nucleus	DDX17	3057.54	1994.32	2870.39	2970.85	3239.25	3095.59	2837.46	3197.84	3580.25	3977.96	3159.36	3928.15	3457.05	3641.47	3083.72	3072.09	3355.56	3538.6	2296.29	3061.34	3977.96
1396104	ILMN_11722	MGC52110	Homo sapiens hypothetical protein MGC52110 (MGC52110), mRNA.	NM_001008215.1	2.76913	3.16434	1.13642	0.0179876	MGC52110	0006355;0003676;0008270;0005634	regulation of transcription DNA-dependent ;nucleic acid binding ;zinc ion binding ;nucleus	MGC52110	1140.07	1350.31	1255.85	1693.07	1608.44	1590.91	1748.6	1688.48	1702.39	1623.83	1511.99	1694.59	1816.18	1817.1	1872.77	1641.66	1550.93	1391.82	1358.45	1773.33	1872.77
1391565	ILMN_17081	C1orf188	Homo sapiens chromosome 1 open reading frame 188 (C1orf188), mRNA.	NM_173795.2	0.29669	0.42697	1.43116	0.0180445	C1orf188	0006355;0006350;0046872;0008270;0003677;0005634	regulation of transcription DNA-dependent ;transcription ;metal ion binding ;zinc ion binding ;DNA binding ;nucleus	C1orf188	73.3691	46.1858	167.477	138.312	154.944	200.239	217.218	206.572	151.082	231.789	126.835	173.935	168.907	207.766	196.735	274.266	247.125	124.468	128.226	285.674	285.674
1383896	ILMN_27573	PEG3	Homo sapiens paternally expressed 3 (PEG3), mRNA.	NM_006210.1	12.3377	15.2723	1.23104	0.0180609	PEG3	0006355;0046872;0003676;0008270;0003700;0005634	regulation of transcription DNA-dependent ;metal ion binding ;nucleic acid binding ;zinc ion binding ;transcription factor activity ;nucleus	PEG3	9415.44	7672.47	5972.03	5295.27	6907.29	7705.58	8187.03	11864.1	6271.81	9151.55	7543.41	8475.33	10500.9	7265.39	9763.72	11718.7	9280.21	6708.11	5364.81	10471.6	11864.1
1380325	ILMN_5188	CD68	Homo sapiens CD68 antigen (CD68), mRNA.	NM_001251.1	1.93595	0.85285	-2.28255	0.0181366	CD68	0005624;0016020;0016021;0005764	membrane fraction ;membrane ;integral to membrane ;lysosome	CD68	457.273	564.16	647.329	587.649	1411.87	1664.35	439.095	634.547	281.049	786.749	424.293	427.704	524.065	712.639	375.37	194.046	253.32	2327.63	1381.63	332.586	2327.63
1391747	ILMN_16907	HAP1	Homo sapiens huntingtin-associated protein 1 (neuroan 1) (HAP1), transcript variant 1, mRNA.	NM_003949.2	0.16932	0.12257	-1.38912	0.0181547	HAP1	0007268;0007275;0005554;0015629	synaptic transmission ;development ;molecular function unknown ;actin cytoskeleton	HAP1	103.58	48.5646	81.7253	58.687	68.3055	111.147	58.6957	86.0677	52.6047	65.0304	44.2826	59.2633	56.6959	64.2441	49.8223	67.4659	45.0297	84.2649	131.325	86.5309	131.325
1383159	ILMN_28567	RCOR2	Homo sapiens REST corepressor 2 (RCOR2), mRNA.	NM_173587.2	0.40362	0.50492	1.24409	0.0182015	RCOR2	0045449;0003677;0005634	regulation of transcription ;DNA binding ;nucleus	RCOR2	202.585	219.921	200.264	142.897	149.6	175.951	277.287	190.362	206.406	258.34	239.293	216.222	249.934	204.321	234.041	271.723	227.846	211.475	194.999	352.35	352.35
1395929	ILMN_12156	SCAND2	Homo sapiens SCAN domain containing 2 (SCAND2), transcript variant 6, mRNA.	NM_033640.1	0.11888	0.16888	1.41274	0.0183467	SCAND2	0006355;0003700;0005634	regulation of transcription DNA-dependent ;transcription factor activity ;nucleus	SCAND2	56.8231	37.9484	84.6347	56.2478	66.1471	67.6245	59.533	47.9981	121.515	93.0381	85.7479	74.0612	82.4877	91.0892	72.8314	62.9125	81.9852	71.8462	55.6606	42.7743	121.515
1397164	ILMN_1037	UNC13B	Homo sapiens unc-13 homolog B (C. elegans) (UNC13B), mRNA.	NM_006377.2	0.38034	0.45326	1.18514	0.0183796	UNC13B	0006917;0007242;0007588;0006887;0046872;0019992;0004872;0005794	induction of apoptosis ;intracellular signaling cascade ;excretion ;exocytosis ;metal ion binding ;diacylglycerol binding ;receptor activity ;Golgi apparatus	UNC13B	166.362	158.805	155.903	221.597	199.428	157.592	248.132	205.231	227.853	256.35	192.535	194.516	194.519	219.862	189.595	259.969	237.84	180.502	160.832	226.85	259.969
1393755	ILMN_139300	TTC12	Homo sapiens tetratricopeptide repeat domain 12 (TTC12), mRNA.	NM_017868.2	0.03892	0.01988	-1.96896	0.0184306	TTC12	5488	binding	TTC12	13.495	11.504	13.2119	4.34346	21.5142	15.6331	19.8537	21.6797	0.61863	24.2008	9.13191	3.52153	-2.34835	13.3165	15.1301	-2.92377	6.67821	57.1265	41.2199	20.7027	57.1265
1396917	ILMN_10669	TLE1	Homo sapiens transducin-like enhancer of split 1 (E(sp1) homolog, Drosophila) (TLE1), mRNA.	NM_005077.3	1.07053	1.39808	1.29876	0.0185639	TLE1	0006355;0007165;0007222;0009887;0007275;0005634	regulation of transcription DNA-dependent ;signal transduction ;frizzled signaling pathway ;organ morphogenesis ;development ;nucleus	TLE1	523.954	587.521	441.934	592.436	426.823	477.61	705.956	628.139	690.758	935.779	509.56	742.304	658.567	607.011	749.183	609.751	742.519	714.303	355.266	1000.41	1000.41
1395603	ILMN_12570	C9orf9	Homo sapiens chromosome 9 open reading frame 9 (C9orf9), mRNA.	NM_018956.3	0.45135	0.55591	1.22486	0.0186875	C9orf9	0007155;0005057;0030674;0005578;0016020;0005887	cell adhesion ;receptor signaling protein activity ;protein binding bridging ;extracellular matrix (sensu Metazoa) ;membrane ;integral to plasma membrane	C9orf9	206.809	268.341	183.706	200.156	275.995	246.426	286.055	156.191	312.189	250.655	256.503	170.67	289.72	285.013	272.847	313.73	288.533	196.314	190.471	292.544	313.73
1379852	ILMN_5877	ANKRD19	Homo sapiens ankyrin repeat domain 19 (ANKRD19), mRNA.	NM_001010925.1	0.54418	0.77055	1.40817	0.0187232	ANKRD19	0006810;0016567;0046872;0005386;0004842;0008270;0005615;000151	transport ;protein ubiquitination ;metal ion binding ;carrier activity ;ubiquitin-protein ligase activity ;zinc ion binding ;extracellular space ;ubiquitin ligase complex	ANKRD19	171.121	111.431	239.836	297.733	348.016	424.174	433.78	273.374	283.811	408.772	242.218	379.706	321.163	417.828	415.753	604.187	412.303	179.995	228.058	382.51	604.187
1377309	ILMN_9455	CCDC24	Homo sapiens coiled-coil domain containing 24 (CCDC24), mRNA.	NM_152499.1	0.85198	1.08933	1.27154	0.0187372	CCDC24	0007283;0005737;0005634	spermatogenesis ;cytoplasm ;nucleus	CCDC24	338.941	296.997	424.957	367.148	420.033	385.366	573.413	540.485	466.518	511.625	400.511	476.371	426.476	746.903	616.879	667.093	618.963	425.635	494.396	657.241	746.903
1381502	ILMN_3663	MAFB	Homo sapiens v-maf musculoaponeurotic fibrosarcoma oncogene homolog B (avian) (MAFB), mRNA.	NM_005461.3	1.06552	0.673	-1.59202	0.0188168	MAFB	0006355;0006350;0007423;0003677;0005634	regulation of transcription DNA-dependent ;transcription ;sensory organ development ;DNA binding ;nucleus	MAFB	261.64	783.975	801.972	640.719	638.781	688.977	461.189	169.076	375.976	329.141	542.727	231.583	373.436	362.6	374.01	306.583	343.897	704.762	318.341	139.155	801.972
1394218	ILMN_138168	RFXDC2	Homo sapiens regulatory factor X domain containing 2 (RFXDC2), mRNA.	NM_022841.2	0.2146	0.3008	1.39392	0.0189212	RFXDC2	0006355;0006350;0003677;0005634	regulation of transcription DNA-dependent ;transcription ;DNA binding ;nucleus	RFXDC2	151.729	145.922	44.6059	88.3599	104.275	125.612	78.9893	143.792	137.38	145.116	121.229	129.583	172.708	184.458	107.784	140.62	147.828	96.2448	67.1077	150.749	184.458
1387226	ILMN_22995	TTC17	Homo sapiens tetratricopeptide repeat domain 17 (TTC17), mRNA.	NM_018259.3	0.7093	0.90426	1.26784	0.0189625	TTC17	5488	binding	TTC17	240.147	287.164	372.457	258.322	352.638	412.241	448.399	428.796	362.461	461.713	329.232	544.39	418.069	498.035	355.464	664.561	446.932	353.138	372.915	491.584	664.561
1384389	ILMN_26946	CEL	Homo sapiens carboxyl ester lipase (bile salt-stimulated lipase) (CEL), mRNA.	NM_001807.2	0.13672	0.24544	1.78526	0.0190695	CEL	0006641;0016042;0030299;0006707;0030157;0004806;0004771;0016787;0004759	triacylglycerol metabolism ;lipid catabolism ;cholesterol absorption ;cholesterol catabolism ;pancreatic juice secretion ;triacylglycerol lipase activity ;sterol esterase activity ;hydrolase activity ;serine esterase activity	CEL	64.6317	18.7197	84.9825	39.1728	80.1225	93.3215	85.4909	87.1314	68.4309	147.543	51.6994	132.729	113.213	114.965	81.9638	87.9351	100.449	66.1722	65.7195	256.454	256.454
1379363	ILMN_6535	LOC339344	Homo sapiens hypothetical protein LOC339344 (LOC339344), mRNA.	NM_001012643.2	4.46777	5.36418	1.19402	0.0192294	LOC339344	0003677;0005634	DNA binding ;nucleus	LOC339344	2961.05	3226.45	2921.95	3106.63	2058.23	2321.74	2675.26	2024.94	3101.66	2456.35	3016.84	2090.89	3299.19	3061.08	2928.19	3207.85	3262.58	2111.37	1446.45	3271.1	3299.19
1393344	ILMN_14429	FZD7	Homo sapiens frizzled homolog 7 (Drosophila) (FZD7), mRNA.	NM_003507.1	0.03745	0.06327	1.67997	0.0192369	FZD7	0007186;0007222;0007275;0042813;0004872;0004930;0016021;0005886	G-protein coupled receptor protein signaling pathway ;frizzled signaling pathway ;development ;Wnt receptor activity ;receptor activity ;G-protein coupled receptor activity ;integral to membrane ;plasma membrane	FZD7	17.8997	21.2582	28.5907	39.1474	20.5541	12.2833	14.4322	18.8101	20.7677	43.9676	17.4934	45.1945	23.3071	31.4641	29.0056	17.8348	33.7009	10.1991	-2.18439	57.9751	57.9751
1392753	ILMN_15415	DDX21	Homo sapiens DEAD (Asp-Glu-Ala-Asp) box polypeptide 21 (DDX21), mRNA.	NM_004728.2	0.89147	0.56813	-1.57783	0.0193593	DDX21	0004004;000166;0003723;0016787;0005524;0005730	ATP-dependent RNA helicase activity ;nucleotide binding ;RNA binding ;hydrolase activity ;ATP binding ;nucleolus	DDX21	451.358	433.05	677.518	540.241	679.664	401.482	249.146	294.81	463.828	145.86	398.89	354.929	255.418	298.157	209.787	115.106	324.784	179.641	623.385	265.74	679.664
1393789	ILMN_139402	LRCH4	Homo sapiens leucine-rich repeats and calponin homology (CH) domain containing 4 (LRCH4), mRNA.	NM_002319.2	0.29144	0.44257	1.51021	0.0193971	LRCH4	7399	neurogenesis	LRCH4	76.6266	49.744	91.5968	106.904	164.439	196.432	124.278	136.531	161.725	305.045	168.661	278.749	212.836	311.432	122.513	241.699	122.998	239.789	228.074	227.247	311.432
1395661	ILMN_12440	SON	Homo sapiens SON DNA binding protein (SON), transcript variant c, mRNA.	NM_138926.1	0.0837	0.12094	1.43704	0.0194441	SON	0006916;0003725;0003676;0003677;0005622;0005634	anti-apoptosis ;double-stranded RNA binding ;nucleic acid binding ;DNA binding ;intracellular ;nucleus	SON	25.3602	16.5133	18.6378	47.9418	55.5917	35.0427	39.973	59.9168	73.2736	66.9678	41.5895	50.2432	40.9522	46.9687	40.2133	71.9339	64.5017	82.8255	61.9771	88.0022	88.0022
1386003	ILMN_24596	ADCY7	Homo sapiens adenylate cyclase 7 (ADCY7), mRNA.	NM_001114.2	0.10512	0.07464	-1.41604	0.0195034	ADCY7	0006171;0007242;000287;0004016;0005887;0005886	cAMP biosynthesis ;intracellular signaling cascade ;magnesium ion binding ;adenylate cyclase activity ;integral to plasma membrane ;plasma membrane	ADCY7	58.2346	48.8382	46.6455	67.4096	61.6494	48.696	56.2219	28.5908	51.3618	23.7864	37.1882	36.477	33.1072	39.7145	38.4281	30.3233	43.194	63.3742	56.2015	35.1251	67.4096
1379488	ILMN_6497	ITGA5	Homo sapiens integrin, alpha 5 (fibronectin receptor, alpha polypeptide) (ITGA5), mRNA.	NM_002205.2	0.31398	0.16141	-1.95601	0.0195222	ITGA5	0007155;0007229;0005515;0004872;0005509;0001726;0016021;0016020;0008305	cell adhesion ;integrin-mediated signaling pathway ;protein binding ;receptor activity ;calcium ion binding ;ruffle ;integral to membrane ;membrane ;integrin complex	ITGA5	139.76	51.558	89.8607	98.7715	209.431	133.912	95.4235	120.971	33.3425	116.402	55.4999	83.8137	83.9006	90.5772	45.0278	48.5211	50.2374	254.292	318.274	159.425	318.274
1380000	ILMN_5633	ZADH2	Homo sapiens zinc binding alcohol dehydrogenase, domain containing 2 (ZADH2), mRNA.	NM_175907.3	1.6278	2.32251	1.41891	0.0196596	ZADH2	0008270;0016491	zinc ion binding ;oxidoreductase activity	ZADH2	801.369	1014.89	691.976	647.885	818.179	715.272	841.245	1223.71	923.253	1253.03	841.557	1087.79	1338.87	1428.82	931.188	1401.52	1241.46	1428.55	355.465	1882.43	1882.43
1378416	ILMN_7892	NCF4	Homo sapiens neutrophil cytosolic factor 4, 40kDa (NCF4), transcript variant 2, mRNA.	NM_013416.2	0.10745	0.08451	-1.2785	0.0197129	NCF4	0006118;0007242;0006952;0005489;0035091;0005515;0005829	electron transport ;intracellular signaling cascade ;defense response ;electron transporter activity ;phosphoinositide binding ;protein binding ;cytosol	NCF4	41.2601	38.4221	46.5063	35.9343	64.2484	56.307	48.2631	51.8156	39.113	50.7662	40.7121	42.008	50.2467	29.6881	37.5517	36.7386	37.2156	88.6896	84.2624	55.4345	88.6896
1386099	ILMN_24507	TIGD4	Homo sapiens tigger transposable element derived 4 (TIGD4), mRNA.	NM_145720.2	0.06249	0.08599	1.36844	0.0197858	TIGD4	0045449;0003677;000775;0005634	regulation of transcription ;DNA binding ;chromosome pericentric region ;nucleus	TIGD4	24.979	15.6494	34.2339	32.7317	27.3286	26.623	41.1454	39.7223	35.1701	53.8334	28.539	32.8655	34.8157	40.176	54.4274	34.4365	32.8921	51.6434	48.6277	77.7636	77.7636
1378081	ILMN_8297	RASSF1	Homo sapiens Ras association (RalGDS/AF-6) domain family 1 (RASSF1), transcript variant A, mRNA.	NM_007182.4	0.53203	0.44679	-1.19738	0.019929	RASSF1	0007050;0007049;0007242;0007265;0046872;0005515;0008270;0019992;0005874;0005634	cell cycle arrest ;cell cycle ;intracellular signaling cascade ;Ras protein signal transduction ;metal ion binding ;protein binding ;zinc ion binding ;diacylglycerol binding ;microtubule ;nucleus	RASSF1	216.523	195.281	314.382	286.049	253.327	324.314	247.281	182.62	200.188	192.707	256.749	288.862	222.274	219.158	175.926	184.875	201.535	307.542	283.655	228.903	324.314
1385177	ILMN_25853	EXOSC10	Homo sapiens exosome component 10 (EXOSC10), transcript variant 2, mRNA.	NM_002685.2	1.5792	1.9106	1.20318	0.0200009	EXOSC10	0006364;000184;0042802;0016787;0008408;0004674;0003723;0005730	rRNA processing ;mRNA catabolism nonsense-mediated decay ;protein self binding ;hydrolase activity ;3'-5' exonuclease activity ;protein serine/threonine kinase activity ;RNA binding ;nucleolus	EXOSC10	724.249	588.532	782.025	786.009	1067.57	968.239	1029.97	688.416	1012.76	996.579	850.947	1227.89	890.418	1009.03	834.545	1268.92	1126.31	712.116	843.539	876.885	1268.92
1394619	ILMN_137126	MGC15523	Homo sapiens hypothetical protein MGC15523 (MGC15523), mRNA.	NM_138570.1	0.1107	0.08431	-1.32038	0.0200756	MGC15523	0006810;0006865;0005279;0016020;0016021	transport ;amino acid transport ;amino acid-polyamine transporter activity ;membrane ;integral to membrane	MGC15523	42.1929	48.9853	63.852	45.0402	41.221	76.0026	41.9275	55.4399	23.1416	35.3874	38.3099	39.189	55.9181	50.8252	41.6761	31.2568	34.6551	74.1811	80.6507	68.2527	80.6507
1396514	ILMN_11207	LIMS1	Homo sapiens LIM and senescent cell antigen-like domains 1 (LIMS1), mRNA.	NM_004987.3	0.08653	0.05862	-1.48418	0.0201374	LIMS1	0007569;0046872;0008270	cell aging ;metal ion binding ;zinc ion binding	LIMS1	65.9307	33.1064	39.0733	21.7136	53.7403	42.5009	32.5356	40.8693	34.9388	33.1845	18.2981	38.2228	21.5804	29.2109	19.3691	25.966	35.8088	65.3298	56.3691	39.5707	65.9307
1393965	ILMN_13905	TRIM52	Homo sapiens tripartite motif-containing 52 (TRIM52), mRNA.	NM_032765.2	0.67094	0.86867	1.28757	0.0202031	TRIM52	0016567;0004842;0046872;0008270;000151	protein ubiquitination ;ubiquitin-protein ligase activity ;metal ion binding ;zinc ion binding ;ubiquitin ligase complex	TRIM52	290.458	328.27	292.096	267.488	316.741	427.819	425.51	411.436	322.083	576.014	312.667	477.953	464.789	459.676	409.101	607.63	417.699	370.555	211.112	342.659	607.63
1396831	ILMN_10767	KIAA1838	Homo sapiens KIAA1838 (KIAA1838), mRNA.	NM_032448.1	3.22039	3.91239	1.20818	0.0202222	KIAA1838	0007165;0007186;0001584;0016526;0004872;0016021	signal transduction ;G-protein coupled receptor protein signaling pathway ;rhodopsin-like receptor activity ;G-protein coupled receptor activity unknown ligand ;receptor activity ;integral to membrane	KIAA1838	1846.48	1763.01	1315.03	1505.79	1801.45	1802.62	2222.9	2390.23	2056.59	1915.7	1695.68	1999.4	2317.52	2216.85	1886.82	2838.66	2509.35	1417.91	1418.66	1767.07	2838.66
1383966	ILMN_27445	MTAP	Homo sapiens methylthioadenosine phosphorylase (MTAP), mRNA.	NM_002451.3	0.51293	0.63004	1.22152	0.0202558	MTAP	0006139;0016763;0017061;0004645	nucleobase nucleoside nucleotide and nucleic acid metabolism ;transferase activity transferring pentosyl groups ;S-methyl-5-thioadenosine phosphorylase activity ;phosphorylase activity	MTAP	285.655	183.355	239.017	244.66	319.946	290.79	248.228	317.284	288.615	369.289	293.88	265.773	375.274	388.986	275.666	300.741	305.763	217.821	178.346	260.297	388.986
1386498	ILMN_23973	ZBTB17	Homo sapiens zinc finger and BTB domain containing 17 (ZBTB17), mRNA.	NM_003443.1	0.7271	0.84432	1.15481	0.0202626	ZBTB17	0006355;0006350;0045786;0046872;0008270;0005515;0003700;0005634	regulation of transcription DNA-dependent ;transcription ;negative regulation of progression through cell cycle ;metal ion binding ;zinc ion binding ;protein binding ;transcription factor activity ;nucleus	ZBTB17	406.893	357.237	324.87	362.25	347.951	415.352	385.475	361.347	295.65	442.018	388.867	493.323	472.772	477.134	445.783	478.389	417.233	365.942	314.5	345.547	493.323
1394244	ILMN_13823	FOXJ1	Homo sapiens forkhead box J1 (FOXJ1), mRNA.	NM_001454.2	0.06496	0.17383	2.6612	0.0204217	FOXJ1	0007267;0006464;0006508;0001503;0004245;0046872;0008270;0004177;0005887;0005886	cell-cell signaling ;protein modification ;proteolysis and peptidolysis ;ossification ;neprilysin activity ;metal ion binding ;zinc ion binding ;aminopeptidase activity ;integral to plasma membrane ;plasma membrane	FOXJ1	13.0885	37.0264	26.6392	39.2475	18.8335	21.9725	42.4624	40.9987	32.2859	190.812	26.0503	59.8043	78.1625	69.881	61.3333	79.697	32.8439	74.589	34.8332	184.746	190.812
1393762	ILMN_139328	FLJ10996	Homo sapiens hypothetical protein FLJ10996 (FLJ10996), mRNA.	NM_019044.2	0.07865	0.11634	1.47112	0.0205619	FLJ10996	74	regulation of cell cycle	FLJ10996	34.1975	23.9604	43.6743	33.9429	46.1364	38.6311	39.6983	35.5713	40.007	79.889	21.178	63.2918	80.404	59.2842	36.8065	51.0363	45.9732	78.8533	43.7668	85.0011	85.0011
1387646	ILMN_2231	FLJ23834	Homo sapiens hypothetical protein FLJ23834 (FLJ23834), mRNA.	NM_152750.2	0.21247	0.30949	1.44858	0.020589	FLJ23834	0007156;0005509;0016020	homophilic cell adhesion ;calcium ion binding ;membrane	FLJ23834	105.999	76.8448	171.672	107.157	145.109	132.853	137.805	64.999	139.606	153.38	158.776	190.036	186.211	112.811	138.641	167.688	115.984	77.983	16.6047	121.907	190.036
1390954	ILMN_17974	HIST1H2BK	Homo sapiens histone 1, H2bk (HIST1H2BK), mRNA.	NM_080593.1	1.57709	1.2761	-1.24272	0.0206792	HIST1H2BK	0006334;0007001;0003677;000786;0005694;0005634	nucleosome assembly ;chromosome organization and biogenesis (sensu Eukaryota) ;DNA binding ;nucleosome ;chromosome ;nucleus	HIST1H2BK	797.973	713.264	605.994	897.977	908.568	818.859	660.454	670.555	717.493	685.946	706.372	571.188	653.356	777.525	632.608	556.19	575.681	1179.51	869.271	729.126	1179.51
1396087	ILMN_11914	DEPDC2	Homo sapiens DEP domain containing 2 (DEPDC2), transcript variant 2, mRNA.	NM_025170.4	0.03774	0.05477	1.44303	0.0206899	DEPDC2	0007242;0005515;0005085	intracellular signaling cascade ;protein binding ;guanyl-nucleotide exchange factor activity	DEPDC2	14.5651	17.9359	15.8823	22.5618	19.0785	12.7466	8.78223	33.1744	26.2799	21.9408	15.4339	33.653	23.3194	17.0997	32.4704	39.3406	17.9857	38.0434	23.5802	50.7217	50.7217
1393558	ILMN_14280	WDR1	Homo sapiens WD repeat domain 1 (WDR1), transcript variant 1, mRNA.	NM_017491.3	2.2643	2.01934	-1.12752	0.0206982	WDR1	0007605;0003779;0005515;0005856	sensory perception of sound ;actin binding ;protein binding ;cytoskeleton	WDR1	1570.2	1182.94	1233.04	1126.01	1268.34	1157.61	1102.01	1172.8	1133.25	1153.78	1107.38	1155.72	896.952	906.996	1232.46	942.664	1198.61	1095.21	1116.14	962.41	1570.2
1387685	ILMN_22362	C4orf8	Homo sapiens chromosome 4 open reading frame 8 (C4orf8), mRNA.	NM_003704.3	0.59456	0.71949	1.20344	0.0207997	C4orf8	0007010;0051016;0003779;0005509;0005200;0015629	cytoskeleton organization and biogenesis ;barbed-end actin filament capping ;actin binding ;calcium ion binding ;structural constituent of cytoskeleton ;actin cytoskeleton	C4orf8	359.809	239.316	286.048	249.589	328.136	300.135	357.079	357.91	298.404	465.025	289.224	344.632	386.233	337.57	349.19	391.102	351.845	229.086	240.153	372.969	465.025
1385334	ILMN_25648	MOXD1	Homo sapiens monooxygenase, DBH-like 1 (MOXD1), transcript variant 2, mRNA.	NM_015529.1	1.15908	1.51903	1.30332	0.0209011	MOXD1	0006584;0006548;0004497;0004500;0005507	catecholamine metabolism ;histidine catabolism ;monooxygenase activity ;dopamine beta-monooxygenase activity ;copper ion binding	MOXD1	923.298	713.949	599.193	617.756	656.14	521.569	522.854	643.474	640.819	830.847	667.769	937.049	556.455	919.48	1084.19	710.238	984.352	497.394	275.31	622.796	1084.19
1388780	ILMN_20846	WDR67	Homo sapiens WD repeat domain 67 (WDR67), mRNA.	NM_145647.1	0.48319	0.62989	1.29642	0.020904	WDR67	0016020;0016021	membrane ;integral to membrane	WDR67	207.082	148.916	246.217	215.056	291.959	321.908	312.993	315.502	334.191	391.728	259.187	308.709	382.844	343.534	269.374	250.74	352.849	148.914	174.762	231.548	391.728
1380754	ILMN_4667	OGT	Homo sapiens O-linked N-acetylglucosamine (GlcNAc) transferase (UDP-N-acetylglucosamine:polypeptide-N-acetylglucosaminyl transferase) (OGT), transcript variant 3, mRNA.	NM_003605.3	2.06131	2.4805	1.19673	0.0209487	OGT	0007165;0007584;0006493;0016757;0005488;0005515;0008375;0005829;0005634	signal transduction ;response to nutrient ;protein amino acid O-linked glycosylation ;transferase activity transferring glycosyl groups ;binding ;protein binding ;acetylglucosaminyltransferase activity ;cytosol ;nucleus	OGT	1139.56	918.382	1073.76	1059.22	1257.61	1350.83	1040.6	1412.52	1365.57	1255.72	1180.5	1283.52	1842.04	1394.12	1218.42	1260.67	1379.83	951.162	708.949	1058.69	1842.04
1391718	ILMN_16866	DDX46	Homo sapiens DEAD (Asp-Glu-Ala-Asp) box polypeptide 46 (DDX46), mRNA.	NM_014829.2	0.78747	0.93898	1.18584	0.0209689	DDX46	000166;0003723;0016787;0005524;0008026	nucleotide binding ;RNA binding ;hydrolase activity ;ATP binding ;ATP-dependent helicase activity	DDX46	500.982	297.104	459.036	341.126	474.564	445.344	434.64	366.641	501.438	408.52	422.519	529.934	511.114	548.55	372.795	511.695	589.864	342.647	310.899	380.87	589.864
1394026	ILMN_138841	RABGAP1L	Homo sapiens RAB GTPase activating protein 1-like (RABGAP1L), mRNA.	NM_014857.2	0.1471	0.10028	-1.47507	0.0210028	RABGAP1L	00079;0007264;0006349;000166;0003924;0005525;00016020	regulation of cyclin dependent protein kinase activity ;small GTPase mediated signal transduction ;imprinting ;nucleotide binding ;GTPase activity ;GTP binding ;membrane	RABGAP1L	54.6939	71.0676	71.6707	64.8294	27.8169	51.0392	72.3785	125.959	42.21	63.3854	55.1513	52.0627	50.3783	48.7977	47.3342	29.846	60.1397	90.7481	98.7492	38.3473	125.959
1387975	ILMN_21913	SIX4	Homo sapiens sine oculis homeobox homolog 4 (Drosophila) (SIX4), mRNA.	NM_017420.2	0.30515	0.42088	1.37165	0.0210399	SIX4	0006355;0009653;0003700;0005634	regulation of transcription DNA-dependent ;morphogenesis ;transcription factor activity ;nucleus	SIX4	160.317	135.456	94.1986	144.049	168.139	162.836	132.548	194.464	190.521	179.941	180.22	167.47	258.834	220.552	131.996	169.795	179.037	147.045	142.702	347.869	347.869
1379786	ILMN_6015	LOC284434	Homo sapiens hypothetical protein LOC284434 (LOC284434), mRNA.	NM_001007525.1	0.54029	1.19594	2.20133	0.0210653	LOC284434	0003677;0005856	DNA binding ;cytoskeleton	LOC284434	204.764	209.25	106.044	207.052	724.086	277.209	476.978	243.052	517.82	1478.97	338.464	802.774	619.446	402.957	342.239	199.863	596.952	214.224	50.0886	825.261	1478.97
1377717	ILMN_8918	FTCD	Homo sapiens formiminotransferase cyclodeaminase (FTCD), transcript variant A, mRNA.	NM_206965.1	0.15713	0.25917	1.64027	0.0210748	FTCD	0006547;0008152;0006760;0016829;0005542;0016740;0030409;0030412;0005737	histidine metabolism ;metabolism ;folic acid and derivative metabolism ;lyase activity ;folic acid binding ;transferase activity ;glutamate formimidoyltransferase activity ;formimidoyltetrahydrofolate cyclodeaminase activity ;cytoplasm	FTCD	21.3742	9.80822	26.4361	46.1491	124.402	158.368	117.44	100.31	115.345	113.035	102.798	91.5261	142.38	173.657	90.5712	155.914	76.4394	110.096	80.7034	166.758	173.657
1393514	ILMN_14216	CRELD1	Homo sapiens cysteine-rich with EGF-like domains 1 (CRELD1), transcript variant 1, mRNA.	NM_001031717.1	1.32245	1.62236	1.22002	0.0211091	CRELD1	0005509;0005198	calcium ion binding ;structural molecule activity	CRELD1	653.878	689.57	686.631	778.076	592.419	888.563	771.444	843.838	783.162	854.841	700.659	596.982	883.243	994.187	833.949	988.546	943.79	522.481	419.197	939.756	994.187
1380583	ILMN_4882	THBS1	Homo sapiens thrombospondin 1 (THBS1), mRNA.	NM_003246.2	0.21324	0.0978	-2.19246	0.0212397	THBS1	0007596;0007275;0007155;0007399;0006928;0004871;0005198;0005515;0008201;0005509;0004866;0005576	blood coagulation ;development ;cell adhesion ;neurogenesis ;cell motility ;signal transducer activity ;structural molecule activity ;protein binding ;heparin binding ;calcium ion binding ;endopeptidase inhibitor activity ;extracellular region	THBS1	97.8843	63.4547	202.12	93.5379	202.065	39.3004	81.3944	51.4656	24.4869	55.202	34.8299	57.8411	52.6571	48.5706	47.3028	19.987	41.9303	43.7592	174.189	95.6362	202.12
1382005	ILMN_30338	RAB3GAP1	Homo sapiens RAB3 GTPase activating protein subunit 1 (catalytic) (RAB3GAP1), mRNA.	NM_012233.1	7.32884	8.17801	1.10972	0.0212636	RAB3GAP1	0043087;0005097;0017137;0005625	regulation of GTPase activity ;Rab GTPase activator activity ;Rab GTPase binding ;soluble fraction	RAB3GAP1	4800.53	4622.2	4028.66	4391.33	3676.61	4290.37	4830.14	4926.12	4153.23	4589.02	4315.34	4379.99	5309.85	4462	4781.64	5523.25	4545.1	3920.68	2924.88	4509.23	5523.25
1393735	ILMN_14076	SAFB2	Homo sapiens scaffold attachment factor B2 (SAFB2), mRNA.	NM_014649.1	2.45756	3.32042	1.34366	0.021285	SAFB2	0006355;0006350;000166;0003723;0003677;0005634	regulation of transcription DNA-dependent ;transcription ;nucleotide binding ;RNA binding ;DNA binding ;nucleus	SAFB2	1742.54	1000.72	776.347	958.248	1706.75	1609.51	1370.38	1348.89	1306.73	2300.59	1074.22	2361.92	2257.22	1880.31	1277.07	1846.16	1714.28	1387.88	1158.02	1830.76	2361.92
1384127	ILMN_27231	TARS	Homo sapiens threonyl-tRNA synthetase (TARS), mRNA.	NM_152295.3	1.5109	1.32391	-1.14756	0.0212996	TARS	0006412;0006435;0006118;000166;0005506;0005489;0004829;0005524;0016874;0005625;0005737	protein biosynthesis ;threonyl-tRNA aminoacylation ;electron transport ;nucleotide binding ;iron ion binding ;electron transporter activity ;threonine-tRNA ligase activity ;ATP binding ;ligase activity ;soluble fraction ;cytoplasm	TARS	808.565	865.592	959.625	853.862	747.147	913.792	702.801	706.532	772.027	677.929	810.435	689.894	706.19	703.719	707.795	576.751	681.019	527.353	768.228	555.168	959.625
1395295	ILMN_13020	HBEGF	Homo sapiens heparin-binding EGF-like growth factor (HBEGF), mRNA.	NM_001945.1	0.17937	0.09854	-1.8304	0.0213019	HBEGF	0007165;0007517;0008083;0005154;0004872;0008201;0005615;0016020;0005887;0009986	signal transduction ;muscle development ;growth factor activity ;epidermal growth factor receptor binding ;receptor activity ;heparin binding ;extracellular space ;membrane ;integral to plasma membrane ;cell surface	HBEGF	85.2685	51.4333	73.3149	77.7259	86.2604	49.1677	44.507	60.3137	61.8441	43.5801	76.6952	44.7127	37.7624	40.6958	30.9179	33.8788	47.3263	168.929	180.8	69.952	180.8
1386771	ILMN_2349	DOCK2	Homo sapiens dedicator of cytokinesis 2 (DOCK2), mRNA.	NM_004946.1	0.33599	0.17536	-1.92667	0.0213025	DOCK2	0048247;0030036;0030676;0005515;0042608;0005525;0051020;0005856;0016020	lymphocyte chemotaxis ;actin cytoskeleton organization and biogenesis ;Rac guanyl-nucleotide exchange factor activity ;protein binding ;T cell receptor binding ;GTP binding ;GTPase binding ;cytoskeleton ;membrane	DOCK2	72.3424	76.9121	153.182	125.481	275.707	237.663	95.9916	106.23	51.662	156.345	81.2028	79.92	95.0806	158.62	61.5744	25.8726	65.0567	335.766	160.198	65.0953	335.766
1391040	ILMN_17894	LOC401233	Homo sapiens similar to HIV TAT specific factor 1; cofactor required for Tat activation of HIV-1 transcription (LOC401233), mRNA.	NM_001013680.1	0.09666	0.06423	-1.51325	0.0213045	LOC401233	0006584;0007601;0005489;0046872;0008131;0016491;0005507	catecholamine metabolism ;visual perception ;electron transporter activity ;metal ion binding ;amine oxidase activity ;oxidoreductase activity ;copper ion binding	LOC401233	31.1507	35.1502	45.8379	37.4116	42.7721	63.4745	52.4665	68.7302	45.7758	9.2269	7.2386	22.6051	16.8127	40.9345	27.0803	41.7413	43.5758	54.002	71.6587	63.76	71.6587
1384324	ILMN_26857	AXIN2	Homo sapiens axin 2 (conductin, axil) (AXIN2), mRNA.	NM_004655.2	1.14233	1.32933	1.15729	0.0214137	AXIN2	0007165;0007222;0007275;0004871;0005634	signal transduction ;frizzled signaling pathway ;development ;signal transducer activity ;nucleus	AXIN2	731.553	502.249	457.377	667.463	694.017	474.986	583.62	591.137	634.653	570.664	590.644	755.124	677.893	789.457	692.343	739.898	803.77	613.315	532.552	642.143	803.77
1383829	ILMN_27709	PILRA	Homo sapiens paired immunoglobin-like type 2 receptor alpha (PILRA), transcript variant 2, mRNA.	NM_178272.1	0.12372	0.08743	-1.42289	0.0214158	PILRA	0007171;0005515;0004872;0005887	transmembrane receptor protein tyrosine kinase activation (dimerization) ;protein binding ;receptor activity ;integral to plasma membrane	PILRA	35.2981	47.5442	52.6752	39.4963	73.193	71.8792	54.9206	51.2462	27.2956	57.8311	40.5887	37.2121	29.6809	39.4914	53.779	30.4049	43.4228	105.73	99.3565	71.9455	105.73
1379050	ILMN_6990	STK33	Homo sapiens serine/threonine kinase 33 (STK33), mRNA.	NM_030906.2	0.09905	0.14604	1.46624	0.0215069	STK33	0006468;0004674;0016740;000166;0005524;0004713	protein amino acid phosphorylation ;protein serine/threonine kinase activity ;transferase activity ;nucleotide binding ;ATP binding ;protein-tyrosine kinase activity	STK33	33.314	33.6424	13.3558	39.1231	63.515	48.1059	84.5187	60.6482	46.6775	90.0338	54.209	94.8092	58.8974	73.324	70.5272	67.4312	57.6262	94.8119	34.8996	85.7087	94.8119
1391958	ILMN_16538	DKFZp686K16132	Homo sapiens similar to BMP2 inducible kinase (DKFZp686K16132), mRNA.	NM_001012987.1	0.42324	0.54848	1.28874	0.0215725	DKFZp686K16132	5086	ARF guanyl-nucleotide exchange factor activity	DKFZp686K16132	185.745	114.84	260.731	160.101	203.95	247.247	267.339	167.602	180.437	280.271	193.247	290.971	319.961	352.446	232.374	248.098	233.875	241.613	208.72	360.023	360.023
1390606	ILMN_18339	PLEKHA6	Homo sapiens pleckstrin homology domain containing, family A member 6 (PLEKHA6), mRNA.	NM_014935.2	2.61951	3.52351	1.33769	0.0215726	PLEKHA6	0006508;0016567;0004842;0008233;0008270;00151	proteolysis and peptidolysis ;protein ubiquitination ;ubiquitin-protein ligase activity ;peptidase activity ;zinc ion binding ;ubiquitin ligase complex	PLEKHA6	1715.21	1204.29	1022	1289.6	1197.82	1379.95	1490.01	2468.56	1481.73	2000.74	1295.03	1807	2310.59	1912.9	1390.53	2528.82	1717.23	1340.46	997.061	2632.75	2632.75
1395919	ILMN_12145	PRKD1	Homo sapiens protein kinase D1 (PRKD1), mRNA.	NM_002742.1	0.34113	0.43999	1.2827	0.0216449	PRKD1	0008283;0007242;0006468;0046872;000166;0004700;0005515;0016740;0004674;0008270;0019992;0005524;0004713;0005794;0005829;0005887;0005886	cell proliferation ;intracellular signaling cascade ;protein amino acid phosphorylation ;metal ion binding ;nucleotide binding ;atypical protein kinase C activity ;protein binding ;transferase activity ;protein serine/threonine kinase activity ;zinc ion binding ;diacylglycerol binding ;ATP binding ;protein-tyrosine kinase activity ;Golgi apparatus ;cytosol ;integral to plasma membrane ;plasma mem…	PRKD1	142.754	110.226	103.277	174.729	247.517	171.571	194.48	211.265	240.337	239.777	160.86	275.01	183.206	224.244	181.243	150.386	204.184	150.695	154.433	271.358	275.01
1387414	ILMN_22627	PYGL	Homo sapiens phosphorylase, glycogen; liver (Hers disease, glycogen storage disease type VI) (PYGL), mRNA.	NM_002863.3	0.81646	0.54359	-1.51029	0.0216612	PYGL	0005975;0005977;0030170;0008184;0016757	carbohydrate metabolism ;glycogen metabolism ;pyridoxal phosphate binding ;glycogen phosphorylase activity ;transferase activity transferring glycosyl groups	PYGL	303.683	220.932	303.674	205.614	575.891	595.865	296.451	541.006	181.443	335.046	222.338	298.838	313.665	300.747	224.841	201.122	171.317	445.526	587.267	410.224	595.865
1395436	ILMN_12773	FLJ41170	Homo sapiens FLJ41170 protein (FLJ41170), mRNA.	NM_001004332.1	0.07466	0.11174	1.48845	0.021677	FLJ41170	0006355;0006350;0007275;0046872;0003707;0003708;0008270;0005515;0003700;005634	regulation of transcription DNA-dependent ;transcription ;development ;metal ion binding ;steroid hormone receptor activity ;retinoic acid receptor activity ;zinc ion binding ;protein binding ;transcription factor activity ;nucleus	FLJ41170	32.4716	27.8316	51.1007	39.0453	36.2007	19.73	59.552	42.1489	40.7583	65.4214	31.1982	55.0449	36.4254	37.4346	48.0511	83.1398	49.221	59.3545	25.7821	92.8907	92.8907
1395067	ILMN_13135	FIS1	Homo sapiens fission 1 (mitochondrial outer membrane) homolog (yeast) (FIS1), mRNA.	NM_016068.1	3.24843	2.7583	-1.18422	0.0217991	FIS1	0006915;0005488;0005739;0016020;0016021	apoptosis ;binding ;mitochondrion ;membrane ;integral to membrane	FIS1	1561.19	2166.8	2050.96	1628.25	1544.8	1672.66	1584.59	1721	1898.33	1083.99	1903.59	1240.74	1399.08	1382.2	1472.31	1331.33	1521.82	1595.65	2107.12	1532.62	2166.8
1386462	ILMN_23920	FSHPRH1	Homo sapiens FSH primary response (LRPR1 homolog, rat) 1 (FSHPRH1), mRNA.	NM_006733.2	0.03386	0.04737	1.39137	0.0219638	FSHPRH1	0007292;0007548;0007283	female gamete generation ;sex differentiation ;spermatogenesis	FSHPRH1	11.4395	8.98317	20.2125	15.9053	25.326	10.4587	13.9139	22.4839	18.5912	27.4874	16.1968	13.1586	27.2496	16.0777	23.5265	27.1833	22.9835	21.1194	35.4555	52.4316	52.4316
1382171	ILMN_30129	ST6GALNAC3	Homo sapiens ST6 (alpha-N-acetyl-neuraminyl-2,3-beta-galactosyl-1, 3)-N-acetylgalactosaminide alpha-2,6-sialyltransferase 3 (ST6GALNAC3), mRNA.	NM_152996.1	0.10802	0.06197	-1.75264	0.0221238	ST6GALNAC3	0006486;0008373;0030173;0016021;0005795	protein amino acid glycosylation ;sialyltransferase activity ;integral to Golgi membrane ;integral to membrane ;Golgi stack	ST6GALNAC3	47.6487	37.1728	51.8957	62.9594	88.5186	38.6984	30.3579	55.9016	58.456	-0.2923	37.6429	62.1414	12.5765	26.2787	27.3431	23.4973	20.6413	48.1452	93.7142	28.5644	93.7142
1385800	ILMN_24968	TXNDC5	Homo sapiens thioredoxin domain containing 5 (TXNDC5), transcript variant 1, mRNA.	NM_030810.2	0.48842	0.44579	-1.1017	0.0221275	TXNDC5	0006916;0006118;0005489;0016853;0005783	anti-apoptosis ;electron transport ;electron transporter activity ;isomerase activity ;endoplasmic reticulum	TXNDC5	227.059	224.983	219.134	250.739	252.71	246.655	208.157	234.581	225.46	216.933	225.298	229.434	185.324	217.6	201.838	182.496	225.979	224.994	289.836	249.408	289.836
1385557	ILMN_25288	FLRT2	Homo sapiens fibronectin leucine rich transmembrane protein 2 (FLRT2), mRNA.	NM_013231.4	1.39109	1.87437	1.33999	0.0221456	FLRT2	0007155;0005057;0030674;0005578;0005887	cell adhesion ;receptor signaling protein activity ;protein binding bridging ;extracellular matrix (sensu Metazoa) ;integral to plasma membrane	FLRT2	813.185	950.313	825.176	1115.8	727.189	527.234	986.829	652.432	1155.59	920.951	726.274	901.4	994.361	1139.87	1080.76	754.32	1431.9	403.8	315.825	807.155	1431.9
1391797	ILMN_16754	OR4D2	Homo sapiens olfactory receptor, family 4, subfamily D, member 2 (OR4D2), mRNA.	NM_001004707.2	0.07667	0.05707	-1.35072	0.0221592	OR4D2	0007165;0007186;0007600;0007608;0004872;0004984;0016021;0016020	signal transduction ;G-protein coupled receptor protein signaling pathway ;sensory perception ;sensory perception of smell ;receptor activity ;olfactory receptor activity ;integral to membrane ;membrane	OR4D2	30.2459	32.0238	37.0075	23.2968	31.4123	41.4321	27.0364	45.5106	27.6142	32.2034	20.5968	16.5997	41.0523	22.9361	22.2137	35.9575	25.598	69.43	74.8314	46.5543	74.8314
1377177	ILMN_9509	MGC15416	Homo sapiens hypothetical protein MGC15416 (MGC15416), mRNA.	NM_138418.2	0.18097	0.25338	1.39234	0.0221679	MGC15416	0006355;0007165;0006350;0006366;0008595;0007498;0003700;0005634	regulation of transcription DNA-dependent ;signal transduction ;transcription ;transcription from RNA polymerase II promoter ;determination of anterior/posterior axis embryo ;mesoderm development ;transcription factor activity ;nucleus	MGC15416	68.5148	72.2785	67.9674	75.0465	90.36	85.5561	70.178	86.9255	90.2608	171.874	101.783	115.96	116.521	177.144	101.053	73.8274	89.8266	161.836	106.868	164.101	177.144
1384972	ILMN_26001	ZMYM3	Homo sapiens zinc finger, MYM-type 3 (ZMYM3), transcript variant 1, mRNA.	NM_005096.2	0.54361	0.66241	1.21182	0.0222671	ZMYM3	0007275;0046872;0008270;0003677;0005634	development ;metal ion binding ;zinc ion binding ;DNA binding ;nucleus	ZMYM3	291.896	283.336	267.508	227.649	228.74	321.564	334.646	235.498	290.272	316.46	289.255	282.611	394.861	305.772	417.692	349.235	363.705	319.211	174.496	282.512	417.692
1382788	ILMN_29191	GMFG	Homo sapiens glia maturation factor, gamma (GMFG), mRNA.	NM_004877.1	0.56628	0.35061	-1.62412	0.0222795	GMFG	0006468;0008047;0003779;0004860;0008083;0005622	protein amino acid phosphorylation ;enzyme activator activity ;actin binding ;protein kinase inhibitor activity ;growth factor activity ;intracellular	GMFG	189.162	168.993	212.688	205.435	326.746	234.045	145.659	304.638	130.179	244.705	142.134	196.671	219.203	204.061	158.461	145.134	117.943	492.286	479.728	131.087	492.286
1390552	ILMN_18498	LOC388438	Homo sapiens hypothetical LOC388438 (LOC388438), mRNA.	NM_001013639.1	0.07079	0.05018	-1.41874	0.0223404	LOC388438	0007600;0007165;0007186;0007608;0004984;0004872;00016021	sensory perception ;signal transduction ;G-protein coupled receptor protein signaling pathway ;sensory perception of smell ;olfactory receptor activity ;receptor activity ;integral to membrane	LOC388438	39.429	29.885	36.6691	18.2535	26.5173	21.9319	27.8557	43.9066	18.9919	42.7021	19.9992	13.9189	23.913	21.3257	18.3607	32.5956	27.9703	68.9311	70.68	37.9205	70.68
1382256	ILMN_29794	RNF123	Homo sapiens ring finger protein 123 (RNF123), mRNA.	NM_022064.2	0.57323	0.67036	1.163	0.0224367	RNF123	0016567;0004842;0046872;0008270;0016874;000151	protein ubiquitination ;ubiquitin-protein ligase activity ;metal ion binding ;zinc ion binding ;ligase activity ;ubiquitin ligase complex	RNF123	289.729	295.491	304.008	326.888	278.241	300.199	329.848	236.69	320.675	340.639	296.802	291.7	419.942	372.206	344.799	313.338	283.39	276.995	202.6	346.188	419.942
1389732	ILMN_19544	MTG1	Homo sapiens mitochondrial GTPase 1 homolog (S. cerevisiae) (MTG1), mRNA.	NM_138384.1	0.06997	0.10047	1.42788	0.0225396	MTG1	5525	GTP binding	MTG1	18.0278	33.4279	35.8427	32.3307	51.563	48.34	39.6053	31.5225	54.0119	79.4445	35.749	64.7454	41.9204	37.7611	36.6221	45.8947	37.6541	44.0419	34.438	58.2423	79.4445
1392549	ILMN_1557	ZFP36	Homo sapiens zinc finger protein 36, C3H type, homolog (mouse) (ZFP36), mRNA.	NM_003407.1	2.58543	0.81105	-3.20542	0.0225444	ZFP36	0006402;0003727;0046872;0008270;0005515;0003729;0003677;0005829;0005634	mRNA catabolism ;single-stranded RNA binding ;metal ion binding ;zinc ion binding ;protein binding ;mRNA binding ;DNA binding ;cytosol ;nucleus	ZFP36	1331.54	184.769	375.335	909.9	2039.56	1648.69	651.733	367.734	134.034	637.752	238.211	843.382	502.982	474.97	154.741	251.052	370.709	3482.29	2793.43	468.088	3482.29
1378214	ILMN_8057	CH25H	Homo sapiens cholesterol 25-hydroxylase (CH25H), mRNA.	NM_003956.2	0.34078	0.09317	-3.67776	0.022565	CH25H	0008152;0006629;0008395;0003824;0005624	metabolism ;lipid metabolism ;steroid hydroxylase activity ;catalytic activity ;membrane fraction	CH25H	60.1367	52.5173	281.022	88.6982	138.714	155.563	119.791	53.8996	22.1749	51.4707	67.7142	50.4502	17.9591	64.0491	65.8905	41.6957	36.2629	204.051	520.215	37.4407	520.215
1381674	ILMN_3437	IFT140	Homo sapiens intraflagellar transport 140 homolog (Chlamydomonas) (IFT140), mRNA.	NM_014714.2	0.16965	0.22434	1.31512	0.0225764	IFT140	0007154;0015285;0005488;0016021;0005922	cell communication ;connexon channel activity ;binding ;integral to membrane ;connexon complex	IFT140	64.245	97.9419	55.3365	79.8596	67.6496	97.3179	80.4978	118.129	87.8117	140.811	58.8847	105.129	140.13	93.6116	98.1865	112.581	116.809	93.2722	76.4114	105.681	140.811
1389561	ILMN_19752	ITGAE	Homo sapiens integrin, alpha E (antigen CD103, human mucosal lymphocyte antigen 1; alpha polypeptide) (ITGAE), mRNA.	NM_002208.3	1.56515	1.3433	-1.17161	0.0225955	ITGAE	0007160;0007155;0007229;0007159;000287;0005515;0004872;0005509;0016021;0008305	cell-matrix adhesion ;cell adhesion ;integrin-mediated signaling pathway ;leukocyte adhesion ;magnesium ion binding ;protein binding ;receptor activity ;calcium ion binding ;integral to membrane ;integrin complex	ITGAE	769.639	593.247	964.85	1019.15	847.135	851.976	855.406	856.415	730.659	685.986	901.925	787.099	748.131	633.893	672.591	620.57	640.451	592.728	785.644	565.996	1019.15
1390794	ILMN_18184	ENG	Homo sapiens endoglin (Osler-Rendu-Weber syndrome 1) (ENG), mRNA.	NM_000118.1	0.66083	0.42205	-1.57442	0.0226096	ENG	0009887;0008015;0007155;0005515;0016020;0005887	organ morphogenesis ;circulation ;cell adhesion ;protein binding ;membrane ;integral to plasma membrane	ENG	394.933	126.275	259.924	256.01	306.497	359.751	141.077	430.128	96.5338	255.099	190.766	188.472	162.955	244.69	130.07	220.173	186.758	518.034	459.603	355.747	518.034
1395653	ILMN_12433	LY86	Homo sapiens lymphocyte antigen 86 (LY86), mRNA.	NM_004271.3	0.49205	0.25608	-1.93209	0.0226713	LY86	0008283;0006915;0006959;0007165;0006954;0004871;0005886	cell proliferation ;apoptosis ;humoral immune response ;signal transduction ;inflammatory response ;signal transducer activity ;plasma membrane	LY86	62.822	193.64	278.114	194.403	400.636	419.902	128.08	121.344	77.7367	247.623	112.702	71.2197	158.605	210.771	161.293	55.4961	88.1935	431.256	205.786	48.7301	431.256
1381421	ILMN_3785	ATP1B3	Homo sapiens ATPase, Na+/K+ transporting, beta 3 polypeptide (ATP1B3), mRNA.	NM_001679.2	2.41665	1.91641	-1.26802	0.0227396	ATP1B3	0006811;0006813;0006814;0030955;0005391;0031402;0016021;0005890;0016020	ion transport ;potassium ion transport ;sodium ion transport ;potassium ion binding ;sodium:potassium-exchanging ATPase activity ;sodium ion binding ;integral to membrane ;sodium:potassium-exchanging ATPase complex ;membrane	ATP1B3	1529.95	1205.28	1454.28	1270.96	920.809	1024.07	1077.41	1273.08	1186.47	1328.63	1131.15	1199.97	1226.94	664.102	824.987	794.372	803.191	1743.93	1413.78	969.418	1743.93
1393130	ILMN_14817	DFFB	Homo sapiens DNA fragmentation factor, 40kDa, beta polypeptide (caspase-activated DNase) (DFFB), transcript variant 2, mRNA.	NM_001004286.1	0.36651	0.5033	1.36563	0.022793	DFFB	0006309;0006915;0007242;0004537;0004518;0016787;0005515;0005622;0005829;0005634	DNA fragmentation during apoptosis ;apoptosis ;intracellular signaling cascade ;caspase-activated deoxyribonuclease activity ;nuclease activity ;hydrolase activity ;protein binding ;intracellular ;cytosol ;nucleus	DFFB	171.373	100.687	158.077	204.867	217.633	181.958	247.871	209.235	231.021	171.372	236.322	276.505	314.341	418.689	139.463	226.308	224.319	133.027	164.419	234.491	418.689
1388030	ILMN_21983	CYR61	Homo sapiens cysteine-rich, angiogenic inducer, 61 (CYR61), mRNA.	NM_001554.3	0.40995	0.24041	-1.71468	0.0228475	CYR61	0008283;0006935;0009653;0007155;0007600;0001558;0005520;0008201;005576	cell proliferation ;chemotaxis ;morphogenesis ;cell adhesion ;sensory perception ;regulation of cell growth ;insulin-like growth factor binding ;heparin binding ;extracellular region	CYR61	330.515	85.525	147.139	205.567	189.57	106.167	242.994	103.398	75.3654	118.56	85.8273	92.545	91.2927	117.156	93.0346	77.0633	193.618	368.668	224.735	194.878	368.668
1394460	ILMN_137520	WBSCR20B	Homo sapiens Williams-Beuren Syndrome critical region protein 20 copy B (WBSCR20B), mRNA.	NM_145645.1	0.05008	0.08127	1.61382	0.0228889	WBSCR20B	0030154;0007399	cell differentiation ;neurogenesis	WBSCR20B	12.5395	19.6631	47.5403	29.398	25.536	23.9063	41.681	11.4064	50.1426	44.0356	42.0926	44.5452	30.7796	57.4419	25.7865	42.8	44.7377	21.6025	28.5964	10.2469	57.4419
1395437	ILMN_12774	MGC16703	Homo sapiens alpha tubulin-like (MGC16703), mRNA.	NM_145042.2	0.10289	0.16008	1.5473	0.0228969	MGC16703	0007018;0005198;0005525;0005874	microtubule-based movement ;structural molecule activity ;GTP binding ;microtubule	MGC16703	30.5016	40.3396	60.4578	35.86	52.6922	86.7665	75.002	68.6022	50.6987	94.6751	46.9287	76.9154	100.35	48.4167	66.689	64.5379	69.3145	37.48	32.9482	137.028	137.028
1378436	ILMN_7915	HAAO	Homo sapiens 3-hydroxyanthranilate 3,4-dioxygenase (HAAO), mRNA.	NM_012205.1	0.09699	0.06188	-1.57609	0.0229643	HAAO	0008152;000334;0005489;0016491;0008987;0005506	metabolism ;3-hydroxyanthranilate 34-dioxygenase activity ;electron transporter activity ;oxidoreductase activity ;quinolinate synthetase A activity ;iron ion binding	HAAO	37.2272	46.3764	46.5605	17.1603	36.9016	34.049	50.6185	48.9455	21.2831	38.3207	30.7287	20.7908	30.2735	30.9349	34.4652	35.1009	24.9525	76.1078	112.324	48.0718	112.324
1394044	ILMN_138887	NR2C2	Homo sapiens nuclear receptor subfamily 2, group C, member 2 (NR2C2), mRNA.	NM_003298.2	1.08668	1.38473	1.26725	0.0231142	NR2C2	0006355;0006350;0007399;0046872;0003713;0003707;0003700;0005634	regulation of transcription DNA-dependent ;transcription ;neurogenesis ;metal ion binding ;transcription coactivator activity ;steroid hormone receptor activity ;transcription factor activity ;nucleus	NR2C2	394.92	525.28	400.546	506.826	424.629	515.514	710.042	840.045	612.134	722.746	609.784	558.796	810.652	730.41	731.39	754.741	734.981	629.509	579.34	943.003	943.003
1383892	ILMN_2757	TTC18	Homo sapiens tetratricopeptide repeat domain 18 (TTC18), mRNA.	NM_145170.2	0.11847	0.17536	1.47203	0.0231689	TTC18	5488	binding	TTC18	59.7744	23.7499	51.6197	29.5272	89.8747	60.4064	95.0484	75.461	62.2375	121.995	58.4117	113.665	53.4368	90.5541	74.0425	98.4254	86.3119	65.3207	45.6649	75.9857	121.995
1387264	ILMN_22842	RPAP1	Homo sapiens RNA polymerase II associated protein 1 (RPAP1), mRNA.	NM_015540.2	0.33545	0.44461	1.31808	0.023176	RPAP1	0019835;0004872;0016021	cytolysis ;receptor activity ;integral to membrane	RPAP1	173.376	89.8487	135.205	121.445	186.067	245.579	156.665	206.052	188.853	321.749	173.048	209.547	192.99	221.303	198.572	277.634	212.631	183.488	130.798	168.547	321.749
1393542	ILMN_14246	APBB3	Homo sapiens amyloid beta (A4) precursor protein-binding, family B, member 3 (APBB3), transcript variant 4, mRNA.	NM_006051.2	2.92524	3.51833	1.19612	0.0231771	APBB3	0007242;0005515;0005737	intracellular signaling cascade ;protein binding ;cytoplasm	APBB3	1884.96	1634.44	1545.69	2048.9	1772.15	1376.93	1829.27	1432.02	2032.88	1582.27	1590.6	1662	1610.87	2230.34	1967.23	2463.53	2078.8	1091.02	1148.05	1750.85	2463.53
1392265	ILMN_16076	PSME1	Homo sapiens proteasome (prosome, macropain) activator subunit 1 (PA28 alpha) (PSME1), transcript variant 1, mRNA.	NM_006263.2	3.4052	2.78947	-1.2275	0.023243	PSME1	0006955;0008538;0008537;000502	immune response ;proteasome activator activity ;proteasome activator complex ;proteasome complex (sensu Eukaryota)	PSME1	1578.14	1798.52	1651.62	1561.08	1978.28	2235.14	1832.54	1720.53	1373.43	1578.66	1641.95	1663.09	1244.25	1533.6	1746.27	1369.09	1139.79	1525.49	2564.96	1619.39	2564.96
1389135	ILMN_2046	CNTNAP4	Homo sapiens contactin associated protein-like 4 (CNTNAP4), transcript variant 1, mRNA.	NM_033401.2	1.2296	0.69172	-1.78744	0.0234068	CNTNAP4	0007155;0005515;0016021	cell adhesion ;protein binding ;integral to membrane	CNTNAP4	407.542	487.651	907.799	491.841	284.587	530.932	305.392	925.791	581.268	186.982	434.254	502.215	369.575	282.448	243.059	208.513	354.052	653.665	1217.24	308.75	1217.24
1379299	ILMN_6674	LRRC61	Homo sapiens leucine rich repeat containing 61 (LRRC61), mRNA.	NM_023942.1	0.05265	0.07441	1.40564	0.0234086	LRRC61	0006355;0006350;0046872;0008270;0005515;0003677;0005634	regulation of transcription DNA-dependent ;transcription ;metal ion binding ;zinc ion binding ;protein binding ;DNA binding ;nucleus	LRRC61	21.0771	24.5176	44.4504	38.928	22.6882	16.9351	30.4456	29.2162	31.5508	34.7783	28.3746	26.6218	46.2784	25.2273	44.1475	32.269	44.4907	33.8673	13.683	58.5329	58.5329
1381546	ILMN_3487	INSM2	Homo sapiens insulinoma-associated 2 (INSM2), mRNA.	NM_032594.2	0.68622	0.88119	1.27704	0.0234186	INSM2	0046872;0003676;0008270;0005634	metal ion binding ;nucleic acid binding ;zinc ion binding ;nucleus	INSM2	400.151	366.4	288.168	320.83	348.419	478.737	443.61	396.609	419.345	365.307	547.522	321.399	476.823	402.875	487.097	600.751	435.125	236.027	177.289	410.824	600.751
1387613	ILMN_22477	LRRIQ1	Homo sapiens leucine-rich repeats and IQ motif containing 1 (LRRIQ1), mRNA.	NM_032165.2	0.0364	0.05952	1.62582	0.023567	LRRIQ1	0007283;0046872;0008270;0005524;0005634	spermatogenesis ;metal ion binding ;zinc ion binding ;ATP binding ;nucleus	LRRIQ1	16.6063	24.2239	12.117	10.8435	13.3116	18.9052	35.1223	29.5794	15.1687	40.5038	26.8269	13.6331	11.4344	28.7356	42.9084	32.6881	33.4763	23.2887	0.06845	55.1654	55.1654
1381562	ILMN_3512	STMN3	Homo sapiens stathmin-like 3 (STMN3), mRNA.	NM_015894.2	20.1686	23.9077	1.17886	0.0236443	STMN3	0007242;0007399	intracellular signaling cascade ;neurogenesis	STMN3	15258.9	14653.3	13045.9	11621	11276.7	11323.1	13748.9	14539.6	13540.9	12069.7	12099.6	10131.5	13607	13773.8	15253.4	19905.8	14824.3	9844.03	8075.03	16153.9	19905.8
1395219	ILMN_13129	VRK3	Homo sapiens vaccinia related kinase 3 (VRK3), transcript variant 1, mRNA.	NM_016440.3	0.11623	0.07705	-1.51692	0.0237088	VRK3	0006310;0006468;0006281;0006260;000166;0003910;0016740;0004674;005524	DNA recombination ;protein amino acid phosphorylation ;DNA repair ;DNA replication ;nucleotide binding ;DNA ligase (ATP) activity ;transferase activity ;protein serine/threonine kinase activity ;ATP binding	VRK3	48.9581	69.9165	78.2158	41.1679	35.3745	28.3028	43.8829	57.4755	55.4531	52.839	47.5973	40.3021	35.4092	17.5304	31.6038	21.5352	33.6149	105.334	85.005	46.6953	105.334
1390997	ILMN_17828	SNX27	Homo sapiens sorting nexin family member 27 (SNX27), mRNA.	NM_030918.5	5.42219	6.29902	1.15531	0.023713	SNX27	0007242;0015031;0005515	intracellular signaling cascade ;protein transport ;protein binding	SNX27	3873.48	3286.16	2372.45	3022.58	3313.85	3592.1	2661.62	3279.05	3375.23	3698.63	3202.65	2933.81	4576.85	3893.58	3331.24	3441.29	3724.05	2492.3	2387.85	3049.58	4576.85
1386108	ILMN_24520	LCE1F	Homo sapiens late cornified envelope 1F (LCE1F), mRNA.	NM_178354.1	0.09668	0.06146	-1.58172	0.0237212	LCE1F	000166;0004872;0005525;0005786;0016020;0005783;0016021	nucleotide binding ;receptor activity ;GTP binding ;signal recognition particle (sensu Eukaryota) ;membrane ;endoplasmic reticulum ;integral to membrane	LCE1F	33.1462	37.7994	46.5909	16.3701	37.8496	37.3307	41.5489	69.4456	13.4274	45.8701	29.6068	38.8215	20.0659	13.233	40.5985	24.2393	23.6904	88.5632	96.6231	60.7342	96.6231
1394286	ILMN_137905	GPX3	Homo sapiens glutathione peroxidase 3 (plasma) (GPX3), mRNA.	NM_002084.2	1.80806	1.27515	-1.42579	0.0237361	GPX3	0006982;0005489;0008430;0016491;0004602;0005625;0005576	response to lipid hydroperoxide ;electron transporter activity ;selenium binding ;oxidoreductase activity ;glutathione peroxidase activity ;soluble fraction ;extracellular region	GPX3	762.939	672.92	1011.51	895.718	1121.48	639.249	1096.9	646.386	631.619	747.957	555.367	798.439	470.725	631.75	608.035	736.055	620.931	877.927	1638.14	792.705	1638.14
1397171	ILMN_10376	GPX1	Homo sapiens glutathione peroxidase 1 (GPX1), transcript variant 2, mRNA.	NM_201397.1	2.59902	2.12392	-1.23048	0.0237693	GPX1	0006979;0008430;0016491;0004602	response to oxidative stress ;selenium binding ;oxidoreductase activity ;glutathione peroxidase activity	GPX1	1402.14	1191.14	1716.92	1083.8	1428.5	1428.48	1102.07	1128.79	1158.47	1239.91	1019.73	1039.12	1095.32	1300.66	1006.78	821.079	1203.26	1673.38	1701.03	1330.21	1716.92
1394695	ILMN_136941	CAMKV	Homo sapiens CaM kinase-like vesicle-associated (CAMKV), mRNA.	NM_024046.2	12.7508	14.8423	1.15761	0.0238032	CAMKV	0006468;0004674;0005524;0004713	protein amino acid phosphorylation ;protein serine/threonine kinase activity ;ATP binding ;protein-tyrosine kinase activity	CAMKV	8946.42	10070.3	7587.06	9153.18	5437.04	6598.48	8976.64	8186.33	8196.77	8076.35	7319.84	6670.3	9204.82	8608.68	8850.78	11034.2	8638.4	6664.58	6161.05	11131.4	11131.4
1387871	ILMN_22195	LST1	Homo sapiens leukocyte specific transcript 1 (LST1), transcript variant 1, mRNA.	NM_007161.2	0.14959	0.09109	-1.65139	0.023866	LST1	0008360;000902;0006955;0050672;0016358;0005515;0005794;0016020;0016021	regulation of cell shape ;cellular morphogenesis ;immune response ;negative regulation of lymphocyte proliferation ;dendrite morphogenesis ;protein binding ;Golgi apparatus ;membrane ;integral to membrane	LST1	30.435	79.1988	56.3446	50.3037	136.402	93.2675	36.3836	68.0941	32.7976	35.4542	49.7906	37.7478	40.6323	69.6423	54.9522	34.6898	52.8316	112.183	91.7377	37.3342	136.402
1391952	ILMN_16531	GMPS	Homo sapiens guanine monphosphate synthetase (GMPS), mRNA.	NM_003875.2	0.76445	0.6248	-1.2303	0.0238931	GMPS	0009113;0006541;0009058;0006164;0006177;000166;0003921;0003922;0005524;00016874	purine base biosynthesis ;glutamine metabolism ;biosynthesis ;purine nucleotide biosynthesis ;GMP biosynthesis ;nucleotide binding ;GMP synthase activity ;GMP synthase (glutamine-hydrolyzing) activity ;ATP binding ;ligase activity	GMPS	389.76	463.781	380.749	434.62	396.288	432.759	312.412	302.83	366.549	289.91	387.636	290.902	265.054	363.113	298.257	281.111	294.389	235.09	512.309	267.608	512.309
1379290	ILMN_666	HRH2	Homo sapiens histamine receptor H2 (HRH2), mRNA.	NM_022304.1	0.15571	0.12004	-1.30432	0.0238965	HRH2	0006955;0007165;0007187;0001584;0004969;0004872;0016020;0005887	immune response ;signal transduction ;G-protein signaling coupled to cyclic nucleotide second messenger ;rhodopsin-like receptor activity ;histamine receptor activity ;receptor activity ;membrane ;integral to plasma membrane	HRH2	71.3044	47.9376	55.5959	61.1968	104.977	64.0219	77.5338	85.2112	52.4319	37.2272	42.5175	65.3585	57.5341	66.8336	69.6191	39.2276	61.6682	99.2325	105.986	88.9678	105.986
1377427	ILMN_9175	ITIH5	Homo sapiens inter-alpha (globulin) inhibitor H5 (ITIH5), transcript variant 3, mRNA.	NM_001001851.1	0.04105	0.05693	1.3794	0.024008	ITIH5	0030212;0004867	hyaluronan metabolism ;serine-type endopeptidase inhibitor activity	ITIH5	8.93946	17.146	17.1141	24.6054	17.9618	6.94554	31.6837	16.4684	20.6458	28.1429	26.308	24.5591	25.2845	33.4671	26.5786	29.3926	26.0444	33.8983	52.7646	50.8811	52.7646
1379175	ILMN_6945	CYBA	Homo sapiens cytochrome b-245, alpha polypeptide (CYBA), mRNA.	NM_000101.2	0.84861	0.3971	-2.14883	0.0240287	CYBA	0006801;0006118;0005489;0046872;0020037;0016491;0005506;0005739;0016020	superoxide metabolism ;electron transport ;electron transporter activity ;metal ion binding ;heme binding ;oxidoreductase activity ;iron ion binding ;mitochondrion ;membrane	CYBA	199.742	219.085	279.661	193.027	760.397	755.832	168.041	230.968	79.3664	317.758	210.251	268.675	237.563	343.685	138.797	91.3511	123.383	716.477	725.058	132.151	760.397
1390023	ILMN_19074	WDR27	Homo sapiens WD repeat domain 27 (WDR27), mRNA.	NM_182552.2	0.13618	0.19092	1.39426	0.0240374	WDR27	0019538;0016706	protein metabolism ;oxidoreductase activity acting on paired donors with incorporation or reduction of molecular oxygen 2-oxoglutarate as one donor and incorporation of one atom each of oxygen into both donors	WDR27	48.4153	44.9439	83.7426	64.7755	65.9516	89.853	97.272	85.3636	81.384	82.4266	86.5117	151.706	67.2175	74.4163	88.2645	75.2677	109.669	49.3438	49.3519	98.8223	151.706
1393930	ILMN_138969	EIF3S7	Homo sapiens eukaryotic translation initiation factor 3, subunit 7 zeta, 66/67kDa (EIF3S7), mRNA.	NM_003753.2	2.61031	2.19537	-1.1956	0.0240713	EIF3S7	0006446;0006412;0003743;0005852	regulation of translational initiation ;protein biosynthesis ;translation initiation factor activity ;eukaryotic translation initiation factor 3 complex	EIF3S7	1090.67	1435.36	1447.89	1034.05	1464.31	1449.52	1434.14	1380.7	970.148	1125.53	1118.76	1095.62	1167.87	1108.05	1372.03	1443.1	1179.82	1283.4	1855.18	1109.11	1855.18
1389793	ILMN_19412	APBB1IP	Homo sapiens amyloid beta (A4) precursor protein-binding, family B, member 1 interacting protein (APBB1IP), mRNA.	NM_019043.3	0.44357	0.23414	-1.90498	0.0240767	APBB1IP	7165	signal transduction	APBB1IP	84.9728	127.167	264.634	137.176	321.627	332.621	186.383	124.199	87.5379	192.042	141.856	71.6874	124.676	180.268	177.434	13.4165	95.5045	442.153	155.284	37.7424	442.153
1393929	ILMN_138968	SDCCAG33	Homo sapiens serologically defined colon cancer antigen 33 (SDCCAG33), mRNA.	NM_005786.3	0.9827	1.20112	1.21553	0.0241163	SDCCAG33	0006355;0007275;0046872;0008270;0003700;0043565;0005634	regulation of transcription DNA-dependent ;development ;metal ion binding ;zinc ion binding ;transcription factor activity ;sequence-specific DNA binding ;nucleus	SDCCAG33	703.941	501.052	439.38	509.239	553.521	571.842	463.391	574.419	555.895	614.952	542.457	546.099	845.156	734.109	591.029	551.508	631.781	286.959	431.303	599.147	845.156
1388635	ILMN_21091	RANBP10	Homo sapiens RAN binding protein 10 (RANBP10), mRNA.	NM_020850.1	0.3298	0.39113	1.17941	0.0241379	RANBP10	0016020;0016021	membrane ;integral to membrane	RANBP10	148.416	120.288	190.352	133.744	191.953	147.015	174.536	197.536	166.198	190.003	154.012	223.716	181.682	189.363	238.158	194.744	187.021	133.395	166.359	166.332	238.158
1385211	ILMN_2569	TCHP	Homo sapiens trichoplein, keratin filament binding (TCHP), mRNA.	NM_032300.2	0.76069	0.89359	1.16824	0.0241659	TCHP	0007010;0005198;0005882	cytoskeleton organization and biogenesis ;structural molecule activity ;intermediate filament	TCHP	301.368	404.737	238.075	429.057	401.923	453.493	387.421	382.661	437.229	525.066	412.426	430.856	397.572	525.599	388.876	507.942	506.253	435.62	369.835	396.055	525.599
1396229	ILMN_11686	TNFAIP6	Homo sapiens tumor necrosis factor, alpha-induced protein 6 (TNFAIP6), mRNA.	NM_007115.2	0.32845	0.19334	-1.70825	0.0241699	TNFAIP6	0007267;0007165;0006954;0007155;0005540;0005515;0005576	cell-cell signaling ;signal transduction ;inflammatory response ;cell adhesion ;hyaluronic acid binding ;protein binding ;extracellular region	TNFAIP6	328.992	78.8178	94.9991	130.223	224.419	134.175	162.937	158.342	96.8436	60.1264	139.175	158.455	96.894	107.794	63.0572	48.5117	102.126	102.06	196.916	64.8227	328.992
1377774	ILMN_8778	ARPM1	Homo sapiens actin related protein M1 (ARPM1), mRNA.	NM_032487.2	0.10042	0.13371	1.32423	0.0242095	ARPM1	0005198;0005515	structural molecule activity ;protein binding	ARPM1	59.3331	43.0933	41.287	44.267	58.7157	31.3016	56.8401	69.2349	55.5327	76.0422	52.398	35.1765	64.5392	55.5156	65.0777	69.28	76.1633	76.983	27.122	89.8205	89.8205
1389347	ILMN_2011	TMEM47	Homo sapiens transmembrane protein 47 (TMEM47), mRNA.	NM_031442.2	4.15577	5.5007	1.31633	0.0242916	TMEM47	16021	integral to membrane	TMEM47	2780.83	2317.66	1263.28	2071.04	3079.39	1734.42	2879.79	2376.84	2278.03	3913.49	2365.68	3841.39	2660.16	3007.7	3687.25	2504.5	2969.15	3299.66	1083.12	3166.47	3913.49
1381250	ILMN_4015	ATP2B4	Homo sapiens ATPase, Ca++ transporting, plasma membrane 4 (ATP2B4), transcript variant 2, mRNA.	NM_001684.3	2.92824	3.66771	1.24562	0.0243672	ATP2B4	0008152;0006816;0006812;0016820;000166;000287;0016787;0005516;0005388;0005509;0005524;0005887;0005886	metabolism ;calcium ion transport ;cation transport ;hydrolase activity acting on acid anhydrides catalyzing transmembrane movement of substances ;nucleotide binding ;magnesium ion binding ;hydrolase activity ;calmodulin binding ;calcium-transporting ATPase activity ;calcium ion binding ;ATP binding ;integral to plasma membrane ;plasma membrane	ATP2B4	2001.78	1617	1403.13	1522.75	1812.92	1933.94	1687.94	1549.39	1683.77	2182.3	1460.32	1354.9	2434.28	2039.15	2237.26	2796.92	2083.02	1413.36	926.952	1643.99	2796.92
1392984	ILMN_15063	C7	Homo sapiens complement component 7 (C7), mRNA.	NM_000587.2	0.19272	0.08024	-2.41524	0.0243706	C7	0009618;0006955;0006957;0019835;0006958;0005615;0005579;0016021	response to pathogenic bacteria ;immune response ;complement activation alternative pathway ;cytolysis ;complement activation classical pathway ;extracellular space ;membrane attack complex ;integral to membrane	C7	92.8099	67.25	32.0842	167.653	183.403	95.2942	59.2546	13.3708	20.805	74.9922	21.6877	71.9209	21.5636	41.9326	35.8036	39.2057	12.2138	47.743	184.238	58.0974	184.238
1379129	ILMN_6882	MAP6	Homo sapiens microtubule-associated protein 6 (MAP6), transcript variant 1, mRNA.	NM_033063.1	0.7208	0.88639	1.22295	0.0243871	MAP6	0004;0046872;0008270;0005515;0005730;000775;0030496	biological process unknown ;metal ion binding ;zinc ion binding ;protein binding ;nucleolus ;chromosome pericentric region ;midbody	MAP6	396.855	439.655	355.546	439.145	408.501	393.524	405.338	343.469	522.618	435.847	400.51	357.977	547.891	373.077	395.85	543.641	518.177	237.21	225.998	399.922	547.891
1392125	ILMN_16321	HCK	Homo sapiens hemopoietic cell kinase (HCK), mRNA.	NM_002110.2	0.29556	0.16163	-1.8388	0.0245967	HCK	0007242;0006468;0007498;000166;0005515;0016740;0005524;0004713	intracellular signaling cascade ;protein amino acid phosphorylation ;mesoderm development ;nucleotide binding ;protein binding ;transferase activity ;ATP binding ;protein-tyrosine kinase activity	HCK	95.0655	95.7117	126.068	66.2275	238.834	259.329	64.8349	67.1517	59.0479	102.56	78.3807	76.4713	77.8807	93.0717	79.1844	60.2196	58.7456	246.524	182.445	85.4235	259.329
1394056	ILMN_13856	KPTN	Homo sapiens kaptin (actin binding protein) (KPTN), mRNA.	NM_007059.1	0.15165	0.1979	1.2978	0.0246296	KPTN	0007015;0007605;0007596;0006928;0003779;0015629;0005815;0005634	actin filament organization ;sensory perception of sound ;blood coagulation ;cell motility ;actin binding ;actin cytoskeleton ;microtubule organizing center ;nucleus	KPTN	51.3314	76.6663	97.4601	55.9314	72.8036	109.62	66.1291	50.6764	62.4834	118.222	81.2537	83.4232	107.381	88.3988	107.305	73.9049	97.1208	101.913	75.9984	116.245	118.222
1392056	ILMN_16445	RGS16	Homo sapiens regulator of G-protein signalling 16 (RGS16), mRNA.	NM_002928.2	1.08346	0.53168	-2.04912	0.0247041	RGS16	0007601;0009968;0008277;0004871;0005096;0005516	visual perception ;negative regulation of signal transduction ;regulation of G-protein coupled receptor protein signaling pathway ;signal transducer activity ;GTPase activator activity ;calmodulin binding	RGS16	861.684	308.609	507.546	311.902	413.691	554.305	405.906	109.511	254.666	210.995	211.973	253.545	335.792	308.794	308.726	237.772	245.434	1234.13	792.083	242.288	1234.13
1380760	ILMN_4673	GAD1	Homo sapiens glutamate decarboxylase 1 (brain, 67kDa) (GAD1), transcript variant GAD25, mRNA.	NM_013445.3	0.1089	0.07855	-1.39407	0.0247256	GAD1	0006540;0007268;0006520;0018352;0042136;0016829;0005515;0004351;0005622;00012506	glutamate decarboxylation to succinate ;synaptic transmission ;amino acid metabolism ;protein-pyridoxal-5-phosphate linkage ;neurotransmitter biosynthesis ;lyase activity ;protein binding ;glutamate decarboxylase activity ;intracellular ;vesicle membrane	GAD1	51.0011	62.8874	80.8102	71.1551	45.3223	35.9179	42.438	36.6264	45.2531	38.6561	40.1881	29.3125	30.9711	34.3318	36.9839	41.1808	38.2604	59.0518	71.6771	57.3407	80.8102
1393811	ILMN_13964	BICD1	Homo sapiens bicaudal D homolog 1 (Drosophila) (BICD1), transcript variant 1, mRNA.	NM_001714.2	1.08954	1.24215	1.13378	0.0247373	BICD1	0008298;0006396;0009653;0005200;0005856;0005795	intracellular mRNA localization ;RNA processing ;morphogenesis ;structural constituent of cytoskeleton ;cytoskeleton ;Golgi stack	BICD1	602.051	647.174	534.225	521.681	510.34	573.791	573.066	622.472	619.497	595.633	549.316	620.45	598.924	673.996	564.227	809.556	675.651	479.416	502.503	707.938	809.556
1390730	ILMN_1810	KDELR2	Homo sapiens KDEL (Lys-Asp-Glu-Leu) endoplasmic reticulum protein retention receptor 2 (KDELR2), mRNA.	NM_006854.2	0.34142	0.21366	-1.60679	0.0247773	KDELR2	0006888;0006886;0005046;0004872;0005794;0005783;0016021	ER to Golgi transport ;intracellular protein transport ;KDEL sequence binding ;receptor activity ;Golgi apparatus ;endoplasmic reticulum ;integral to membrane	KDELR2	150.773	120.435	112.897	147.599	244.445	217.186	114.431	124.45	129.344	78.0636	118.25	105.037	65.1374	78.2416	106.872	82.149	143.558	97.8783	321.521	118.506	321.521
1394788	ILMN_13614	ABCA7	Homo sapiens ATP-binding cassette, sub-family A (ABC1), member 7 (ABCA7), transcript variant 1, mRNA.	NM_019112.2	0.11208	0.16207	1.438	0.0247849	ABCA7	0016887;000166;0005215;0005524;0016021;0043190	ATPase activity ;nucleotide binding ;transporter activity ;ATP binding ;integral to membrane ;ATP-binding cassette (ABC) transporter complex	ABCA7	40.5564	33.3996	38.2478	48.7358	50.8478	95.4905	70.8845	60.3209	34.0829	127.335	49.877	85.5806	89.0983	73.4228	74.8316	78.7913	77.3225	69.9387	67.4627	78.7323	127.335
1383568	ILMN_28026	TMOD3	Homo sapiens tropomodulin 3 (ubiquitous) (TMOD3), mRNA.	NM_014547.3	0.111	0.14847	1.33014	0.0250978	TMOD3	0005523;0003779;0005856;0008290	tropomyosin binding ;actin binding ;cytoskeleton ;F-actin capping protein complex	TMOD3	40.7667	42.2486	44.6092	47.7734	68.6881	71.5419	45.2143	77.1598	43.3019	90.2253	43.5475	72.007	90.1893	75.2585	55.3896	89.0065	77.2412	48.6234	80.0111	70.29	90.2253
1384333	ILMN_26866	TMEM49	Homo sapiens transmembrane protein 49 (TMEM49), mRNA.	NM_030938.2	0.65145	0.53671	-1.22052	0.0251051	TMEM49	16021	integral to membrane	TMEM49	260.049	300.885	423.835	321.101	342.703	293.986	232.963	264.947	265.783	235.253	302.678	221.734	293.549	282.043	260.779	240.863	300.834	457.528	319.392	233.751	457.528
1384561	ILMN_26531	TMCO2	Homo sapiens transmembrane and coiled-coil domains 2 (TMCO2), mRNA.	NM_001008740.2	0.04313	0.02414	-1.79652	0.0251588	TMCO2	8080	N-acetyltransferase activity	TMCO2	31.7184	21.8407	17.1297	6.7731	17.2728	7.42422	10.9098	50.2506	8.68039	6.38376	9.55063	11.8381	19.7104	7.28235	2.80884	19.558	8.26199	29.468	43.4238	18.5496	50.2506
1397080	ILMN_10468	AQP7	Homo sapiens aquaporin 7 (AQP7), mRNA.	NM_001170.1	0.11405	0.06984	-1.64211	0.0252202	AQP7	0006833;0006091;0006810;0007588;0015793;0015250;0015288;0005215;0015254;0016021;0016020;0005887;00019867	water transport ;generation of precursor metabolites and energy ;transport ;excretion ;glycerol transport ;water channel activity ;porin activity ;transporter activity ;glycerol channel activity ;integral to membrane ;membrane ;integral to plasma membrane ;outer membrane	AQP7	34.2989	43.4858	35.6157	39.5186	21.9709	53.7488	51.4911	80.8139	27.4096	34.12	37.2788	39.0539	38.2424	31.1307	23.7526	30.6184	26.2919	102.165	119.019	64.1518	119.019
1396995	ILMN_10548	ALG5	Homo sapiens asparagine-linked glycosylation 5 homolog (yeast, dolichyl-phosphate beta-glucosyltransferase) (ALG5), mRNA.	NM_013338.3	1.22232	0.99368	-1.23692	0.0253384	ALG5	0006486;0016740;0016757;0004576;0004581;0005783;00016021	protein amino acid glycosylation ;transferase activity ;transferase activity transferring glycosyl groups ;oligosaccharyl transferase activity ;dolichyl-phosphate beta-glucosyltransferase activity ;endoplasmic reticulum ;integral to membrane	ALG5	615.041	506.081	699.767	518.709	542.277	599.528	477.939	686.092	513.539	515.632	570.831	703.181	393.735	435.846	460.421	541.176	484.926	733.282	840.619	443.169	840.619
1382684	ILMN_29270	LRRC25	Homo sapiens leucine rich repeat containing 25 (LRRC25), mRNA.	NM_145256.2	0.06197	0.03951	-1.57734	0.0253423	LRRC25	16021	integral to membrane	LRRC25	25.6009	3.91715	27.3869	30.3729	33.2134	32.6404	22.7934	44.4034	14.9724	33.311	10.6181	21.0849	29.7492	7.1913	23.5412	14.2737	16.6489	72.592	46.8121	29.7626	72.592
1383711	ILMN_27776	FLJ22662	Homo sapiens hypothetical protein FLJ22662 (FLJ22662), mRNA.	NM_024829.4	0.11899	0.0599	-1.99745	0.0254383	FLJ22662	0006355;0003676;0008270;0005634	regulation of transcription DNA-dependent ;nucleic acid binding ;zinc ion binding ;nucleus	FLJ22662	41.2655	21.1136	43.7972	76.8891	123.571	77.2174	47.6162	60.8231	23.0865	28.5315	30.3207	46.7729	37.5601	33.0726	29.8172	24.3235	20.0927	5.52561	97.0856	23.8626	123.571
1380233	ILMN_5510	MAP6	Homo sapiens microtubule-associated protein 6 (MAP6), transcript variant 2, mRNA.	NM_207577.1	0.52216	0.65945	1.25596	0.0254958	MAP6	4872	receptor activity	MAP6	271.676	266.019	257.184	301.859	296.476	287.5	334.339	261.204	305.424	386.79	252.444	228.177	325.709	379.184	355.751	282.264	366.803	155.985	155.896	385.151	386.79
1391920	ILMN_16478	SLC7A7	Homo sapiens solute carrier family 7 (cationic amino acid transporter, y+ system), member 7 (SLC7A7), mRNA.	NM_003982.2	0.31442	0.14001	-2.25809	0.0255611	SLC7A7	0006810;0006461;0006520;0006865;0005279;0005286;0016020;0005887	transport ;protein complex assembly ;amino acid metabolism ;amino acid transport ;amino acid-polyamine transporter activity ;basic amino acid permease activity ;membrane ;integral to plasma membrane	SLC7A7	66.1867	59.602	129.622	85.7082	208.829	294.032	88.8542	101.443	36.9941	106.128	54.2916	85.1491	72.127	120.706	47.376	40.0462	61.2206	365.28	140.578	52.5005	365.28
1388574	ILMN_21210	GNAT1	Homo sapiens guanine nucleotide binding protein (G protein), alpha transducing activity polypeptide 1 (GNAT1), transcript variant 1, mRNA.	NM_144499.1	0.07754	0.05554	-1.40382	0.0255626	GNAT1	0007600;0007165;0007186;0007601;000166;0004871;0003924;0005525	sensory perception ;signal transduction ;G-protein coupled receptor protein signaling pathway ;visual perception ;nucleotide binding ;signal transducer activity ;GTPase activity ;GTP binding	GNAT1	29.9083	23.1264	38.2896	24.8755	40.7404	23.232	49.2636	59.929	18.8542	8.78464	23.0147	34.6524	23.69	38.8339	29.2679	24.1473	36.8857	64.3857	62.99	38.7905	64.3857
1382505	ILMN_29462	CLDN15	Homo sapiens claudin 15 (CLDN15), transcript variant 1, mRNA.	NM_014343.1	0.30666	0.39996	1.29703	0.0256449	CLDN15	0016338;0042802;0005198;0005923;0016020;0016021	calcium-independent cell-cell adhesion ;protein self binding ;structural molecule activity ;tight junction ;membrane ;integral to membrane	CLDN15	162.032	96.3706	116.038	132.579	222.788	193.942	122.834	154.713	152.038	214.422	183.467	298.006	235.694	188.188	149.124	141.687	153.931	151.847	136.654	217.306	298.006
1384339	ILMN_26873	MARK1	Homo sapiens MAP/microtubule affinity-regulating kinase 1 (MARK1), mRNA.	NM_018650.2	1.40781	1.71294	1.21003	0.0257642	MARK1	0007010;0006468;0007243;000166;000287;0016740;0004674;0005524;0005856;0005737	cytoskeleton organization and biogenesis ;protein amino acid phosphorylation ;protein kinase cascade ;nucleotide binding ;magnesium ion binding ;transferase activity ;protein serine/threonine kinase activity ;ATP binding ;cytoskeleton ;cytoplasm	MARK1	720.57	785.265	668.629	834.655	688.273	714.366	856.737	1002.41	837.753	780.462	814.461	708.993	1122.44	884.529	866.619	1084.64	1014.55	660.365	393.382	931.574	1122.44
1391430	ILMN_17348	MINK1	Homo sapiens misshapen-like kinase 1 (zebrafish) (MINK1), transcript variant 1, mRNA.	NM_015716.2	0.19545	0.26337	1.34007	0.0258707	MINK1	0006950;0007275;0007254;0006468;0007243;000166;0005083;0016740;0004674;0005524	response to stress ;development ;JNK cascade ;protein amino acid phosphorylation ;protein kinase cascade ;nucleotide binding ;small GTPase regulator activity ;transferase activity ;protein serine/threonine kinase activity ;ATP binding	MINK1	140.197	78.1226	72.5803	70.5407	59.942	136.161	108.397	80.3652	109.211	128.136	97.6506	196.967	107.073	112.562	141.07	111.353	150.771	111.656	99.8609	105.402	196.967
1395644	ILMN_12419	PFTK1	Homo sapiens PFTAIRE protein kinase 1 (PFTK1), mRNA.	NM_012395.2	4.87825	6.00173	1.22352	0.0259078	PFTK1	0006468;0004674;0016740;000166;0005524;0005737;0005634	protein amino acid phosphorylation ;protein serine/threonine kinase activity ;transferase activity ;nucleotide binding ;ATP binding ;cytoplasm ;nucleus	PFTK1	3409.96	2876.38	2970.2	2207.17	2243.25	2848.52	3155.66	4276.36	2843.12	2985.88	3041.12	2965.2	3781.46	3324.11	3199.12	4046.7	3913.35	1948.19	1477.8	3296.11	4276.36
1386452	ILMN_23904	C1orf82	Homo sapiens chromosome 1 open reading frame 82 (C1orf82), mRNA.	NM_024813.1	1.34514	1.61981	1.19755	0.0261218	C1orf82	5515	protein binding	C1orf82	884.745	761.589	801.731	657.381	580.544	709.76	634.148	896.873	797.524	978.338	675.177	777.674	1016.65	921.384	717.889	799.121	899.829	597.519	440.531	920.248	1016.65
1385584	ILMN_25097	EMP1	Homo sapiens epithelial membrane protein 1 (EMP1), mRNA.	NM_001423.1	2.4055	0.58116	-4.16209	0.0262441	EMP1	0008283;0008544;0016049;0008219;0007275;0005624;0016020;00016021	cell proliferation ;epidermis development ;cell growth ;cell death ;development ;membrane fraction ;membrane ;integral to membrane	EMP1	4162.73	144.49	723.156	443.936	1883.13	833.632	392.145	489.131	105.314	534.458	179.427	702.895	162.169	255.547	178.93	156.403	207.934	1298.43	2506.23	381.111	4162.73
1387179	ILMN_22941	FLJ11806	Homo sapiens nuclear protein UKp68 (FLJ11806), transcript variant 1, mRNA.	NM_024824.3	0.73614	0.90589	1.22382	0.0262817	FLJ11806	0003676;0005634	nucleic acid binding ;nucleus	FLJ11806	498.353	392.559	265.716	355.825	402.631	414.023	339.021	482.635	476.871	545.246	408.102	460.439	613.558	418.354	404.891	437.63	421.566	269.402	280.325	402.195	613.558
1378723	ILMN_7444	UBE2S	Homo sapiens ubiquitin-conjugating enzyme E2S (UBE2S), mRNA.	NM_014501.1	1.63894	1.4507	-1.13602	0.0263729	UBE2S	0006512;0004842;0008642;0016874	ubiquitin cycle ;ubiquitin-protein ligase activity ;ubiquitin-like activating enzyme activity ;ligase activity	UBE2S	866.152	1025.24	952.255	845.156	788.296	891.657	905.084	651.91	890.391	663.611	779.82	503.814	822.253	723.811	888.435	771.935	751.112	862.873	775.503	807.59	1025.24
1383561	ILMN_28017	AKAP13	Homo sapiens A kinase (PRKA) anchor protein 13 (AKAP13), transcript variant 2, mRNA.	NM_007200.3	0.13713	0.17589	1.27558	0.026415	AKAP13	0007242;0046872;0004871;0016301;0004872;0004691;0008270;0019992;0005089;0005085;0005624	intracellular signaling cascade ;metal ion binding ;signal transducer activity ;kinase activity ;receptor activity ;cAMP-dependent protein kinase activity ;zinc ion binding ;diacylglycerol binding ;Rho guanyl-nucleotide exchange factor activity ;guanyl-nucleotide exchange factor activity ;membrane fraction	AKAP13	93.8617	42.1582	55.6558	49.4161	58.8514	87.6616	69.9295	63.3344	55.2773	95.9922	69.1474	96.3488	91.3038	71.9189	80.5254	94.9477	98.7017	77.6168	87.0641	80.4818	98.7017
1396384	ILMN_11468	RAB25	Homo sapiens RAB25, member RAS oncogene family (RAB25), mRNA.	NM_020387.1	0.06784	0.04879	-1.39832	0.0264352	RAB25	0006355;0006886;0007264;000160;000166;0005525;0003677	regulation of transcription DNA-dependent ;intracellular protein transport ;small GTPase mediated signal transduction ;two-component signal transduction system (phosphorelay) ;nucleotide binding ;GTP binding ;DNA binding	RAB25	23.4275	50.1257	38.102	24.9767	40.6066	26.0869	31.7457	27.5089	19.6048	39.7445	21.289	17.7746	25.7214	30.3923	16.8927	27.5257	26.242	52.762	47.5651	20.861	52.762
1385864	ILMN_24830	COL7A1	Homo sapiens collagen, type VII, alpha 1 (epidermolysis bullosa, dystrophic, dominant and recessive) (COL7A1), mRNA.	NM_000094.2	0.34088	0.46689	1.36209	0.0264925	COL7A1	0008544;0007155;0006817;0004867;0005198;0005515;0005604;0005590;0005737	epidermis development ;cell adhesion ;phosphate transport ;serine-type endopeptidase inhibitor activity ;structural molecule activity ;protein binding ;basement membrane ;collagen type VII ;cytoplasm	COL7A1	120.115	51.5836	248.329	176.454	161.044	209.904	187.711	148.401	166.137	288.579	132.966	330.944	193.349	280.139	172.34	291.917	191.206	176.941	179.789	230.918	330.944
1396300	ILMN_11576	PPP2R5E	Homo sapiens protein phosphatase 2, regulatory subunit B (B56), epsilon isoform (PPP2R5E), mRNA.	NM_006246.2	3.46711	4.04043	1.15894	0.0264981	PPP2R5E	0007165;0008601;0004721;0016787;000159;0005737	signal transduction ;protein phosphatase type 2A regulator activity ;phosphoprotein phosphatase activity ;hydrolase activity ;protein phosphatase type 2A complex ;cytoplasm	PPP2R5E	2283.46	2581.47	1851.83	1847.63	1757.99	1605.02	1906.39	2170.43	2173.96	2005.41	1807.73	1809.02	2156.38	2126.38	2313.01	2378.8	2456.27	1259.56	1654.29	2758.44	2758.44
1379689	ILMN_6113	PSD3	Homo sapiens pleckstrin and Sec7 domain containing 3 (PSD3), transcript variant 1, mRNA.	NM_015310.2	0.07803	0.10139	1.29232	0.0265033	PSD3	5085	guanyl-nucleotide exchange factor activity	PSD3	30.2673	44.3603	41.4399	49.8607	47.4763	39.62	34.3536	36.153	38.4868	39.0197	59.6294	39.8303	47.2454	62.9583	53.3077	54.8088	46.0065	48.3439	36.455	54.7507	62.9583
1386566	ILMN_23854	SRPX2	Homo sapiens sushi-repeat-containing protein, X-linked 2 (SRPX2), mRNA.	NM_014467.1	0.06826	0.03953	-1.73663	0.0265348	SRPX2	0004;0005554;0008372	biological process unknown ;molecular function unknown ;cellular component unknown	SRPX2	41.7108	17.7492	18.2947	62.557	31.5924	46.6853	29.7644	25.3607	17.1763	19.2579	32.5085	29.2932	21.6245	8.24326	13.3148	12.6886	13.5402	31.4909	53.0615	28.0961	62.557
1394781	ILMN_13606	HLA-DPA1	Homo sapiens major histocompatibility complex, class II, DP alpha 1 (HLA-DPA1), mRNA.	NM_033554.2	0.90637	0.49876	-1.82734	0.0265661	HLA-DPA1	0019886;0006955;0019884;0045012;0016020;0005887	antigen processing exogenous antigen via MHC class II ;immune response ;antigen presentation exogenous antigen ;MHC class II receptor activity ;membrane ;integral to plasma membrane	HLA-DPA1	212.008	428.107	396.979	515.725	930.714	877.858	212.727	239.123	263.746	437.269	318.778	172.806	329.681	325.912	185.091	63.0852	208.874	304.982	514.664	160.269	930.714
1389471	ILMN_1985	LMAN2L	Homo sapiens lectin, mannose-binding 2-like (LMAN2L), mRNA.	NM_030805.1	0.80396	1.0033	1.24106	0.026572	LMAN2L	0006888;0006457;0015031;0005537;0005529;0005794;0005789;0016020;0016021;0030134	ER to Golgi transport ;protein folding ;protein transport ;mannose binding ;sugar binding ;Golgi apparatus ;endoplasmic reticulum membrane ;membrane ;integral to membrane ;ER to Golgi transport vesicle	LMAN2L	306.08	382.085	255.842	441.383	449.784	455.802	358.172	525.665	501.864	556.932	362.019	472.764	568.828	487.263	544.499	443.502	481.298	501.647	335.843	691.203	691.203
1384796	ILMN_26194	FLJ90231	Homo sapiens hypothetical protein FLJ90231 (FLJ90231), mRNA.	NM_173581.1	0.08124	0.11272	1.37988	0.0266963	FLJ90231	0005975;0004565;0016787;0009341	carbohydrate metabolism ;beta-galactosidase activity ;hydrolase activity ;beta-galactosidase complex	FLJ90231	45.5237	35.6609	54.2262	40.3515	46.6531	42.4391	49.8631	32.2858	48.4118	56.1236	35.7144	64.6697	68.4103	52.9861	36.0048	72.0987	67.8788	44.2285	27.5317	42.7028	72.0987
1385643	ILMN_25185	CCL2	Homo sapiens chemokine (C-C motif) ligand 2 (CCL2), mRNA.	NM_002982.3	0.37967	0.10613	-3.59733	0.0267907	CCL2	0007267;0006935;0006959;0019079;0007187;0006874;0007155;0009618;0007600;0006916;0006468;0006954;0009887;0007259;0004672;0008009;0005615;00016020	cell-cell signaling ;chemotaxis ;humoral immune response ;viral genome replication ;G-protein signaling coupled to cyclic nucleotide second messenger ;calcium ion homeostasis ;cell adhesion ;response to pathogenic bacteria ;sensory perception ;anti-apoptosis ;protein amino acid phosphorylation ;inflammatory response ;organ morphogenesis ;JAK-STAT cascade ;protein kinase activity ;chemokine activi…	CCL2	276.404	45.9713	141.307	55.7232	429.918	299.553	60.7806	35.6228	31.8855	61.5685	28.9302	58.168	77.564	42.1247	43.4887	48.6556	39.3887	92.4946	462.798	84.2075	462.798
1391976	ILMN_16560	KIAA0564	Homo sapiens KIAA0564 protein (KIAA0564), transcript variant 1, mRNA.	NM_015058.1	0.2428	0.33362	1.36648	0.0268557	KIAA0564	0006457;0016887;000166;0005524;0051082;0005739;0005634	protein folding ;ATPase activity ;nucleotide binding ;ATP binding ;unfolded protein binding ;mitochondrion ;nucleus	KIAA0564	145.206	148.42	156.958	121.046	98.1348	90.5239	133.886	137.622	165.412	191.877	226.397	193.036	192.555	135.763	121.641	119.678	161.331	87.7278	61.1819	104.847	226.397
1383312	ILMN_28349	SLC37A1	Homo sapiens solute carrier family 37 (glycerol-3-phosphate transporter), member 1 (SLC37A1), mRNA.	NM_018964.3	0.279	0.34498	1.22964	0.026915	SLC37A1	0007242;0035091;0005515	intracellular signaling cascade ;phosphoinositide binding ;protein binding	SLC37A1	137.353	138.249	123.696	165.39	148.873	165.262	152.366	95.2331	144.623	148.63	141.705	126.202	180.351	150.775	207.498	200.199	168.192	99.8981	139.666	186.03	207.498
1395718	ILMN_12301	UBE2J1	Homo sapiens ubiquitin-conjugating enzyme E2, J1 (UBC6 homolog, yeast) (UBE2J1), mRNA.	NM_016021.2	1.67813	1.96152	1.16243	0.0269163	UBE2J1	0006512;0004842;0008642;0016874;0005783;0016021	ubiquitin cycle ;ubiquitin-protein ligase activity ;ubiquitin-like activating enzyme activity ;ligase activity ;endoplasmic reticulum ;integral to membrane	UBE2J1	1082.9	1095.17	808.019	1119.04	877.158	731.842	716.715	876.578	889.787	1167.48	994.106	1026.52	1111.6	1015.81	1044.05	1297.97	968.618	851.204	654.508	896.792	1297.97
1377785	ILMN_8796	LRRC48	Homo sapiens leucine rich repeat containing 48 (LRRC48), mRNA.	NM_031294.2	0.04928	0.0625	1.26124	0.0270257	LRRC48	0007165;0006461;0004385;0005515;0005624;0016020;0005887;0009986	signal transduction ;protein complex assembly ;guanylate kinase activity ;protein binding ;membrane fraction ;membrane ;integral to plasma membrane ;cell surface	LRRC48	20.857	18.7911	32.848	17.5497	21.9523	23.9792	25.0796	28.0763	37.6595	32.7195	19.4608	21.9943	35.3223	28.3271	38.0964	29.53	26.9708	32.8415	51.3158	46.0757	51.3158
1381313	ILMN_3868	BCL2	Homo sapiens B-cell CLL/lymphoma 2 (BCL2), nuclear gene encoding mitochondrial protein, transcript variant alpha, mRNA.	NM_000633.2	0.74244	0.9712	1.3009	0.0271108	BCL2	0006916;0001836;0006959;00074;0008285;0042981;0042802;0005739;0016020;0005741;0005783;0016021;0005634	anti-apoptosis ;release of cytochrome c from mitochondria ;humoral immune response ;regulation of cell cycle ;negative regulation of cell proliferation ;regulation of apoptosis ;protein self binding ;mitochondrion ;membrane ;mitochondrial outer membrane ;endoplasmic reticulum ;integral to membrane ;nucleus	BCL2	393.793	397.779	329.822	408.391	416.423	360.452	482.518	304.763	421.231	662.559	293.069	673.837	568.079	416.629	549.554	355.738	507.82	449.58	194.548	485.887	673.837
1395772	ILMN_12371	LOC440348	Homo sapiens similar to nuclear pore complex interacting protein (LOC440348), mRNA.	NM_001018059.1	3.15432	4.22691	1.33265	0.0271762	LOC440348	0008283;0006469;0007165;00074;0008426;0019904;0005615;0005737	cell proliferation ;negative regulation of protein kinase activity ;signal transduction ;regulation of cell cycle ;protein kinase C inhibitor activity ;protein domain specific binding ;extracellular space ;cytoplasm	LOC440348	1570.56	793.402	2326.46	1304.94	2037.13	2231.32	2361.17	1770.5	1615.84	2818.92	1932.6	2869.01	3180.88	1622.77	1963.4	2557.81	2422.5	905.64	1644.91	2120.99	3180.88
1387474	ILMN_22709	CXorf1	Homo sapiens chromosome X open reading frame 1 (CXorf1), mRNA.	NM_004709.2	0.35015	0.43828	1.24479	0.0272552	CXorf1	0004;0005554;0008372	biological process unknown ;molecular function unknown ;cellular component unknown	CXorf1	136.735	196.465	153.224	221.334	169.166	142.477	194.797	194.193	190.957	231.904	183.232	179.959	208.568	267.577	278.268	217.426	194.355	199.678	99.548	177.651	278.268
1392013	ILMN_16375	C6orf64	Homo sapiens chromosome 6 open reading frame 64 (C6orf64), mRNA.	NM_018322.1	0.20593	0.26932	1.30064	0.0272569	C6orf64	16021	integral to membrane	C6orf64	82.0162	80.1355	60.4461	132.266	152.54	107.962	45.7071	105.612	133.937	126.42	120.868	131.435	122.549	115.326	148.169	159.803	102.022	144.419	99.659	122.405	159.803
1380911	ILMN_4441	PLSCR1	Homo sapiens phospholipid scramblase 1 (PLSCR1), mRNA.	NM_021105.1	0.31319	0.15591	-2.01989	0.0272608	PLSCR1	0009615;0017121;0030168;0005509;0017128;0005515;0016021;0005886	response to virus ;phospholipid scrambling ;platelet activation ;calcium ion binding ;phospholipid scramblase activity ;protein binding ;integral to membrane ;plasma membrane	PLSCR1	140.335	78.0125	156.266	76.3217	238.789	203.23	82.0797	65.588	68.0829	90.7661	78.3352	137.084	83.3886	46.8177	56.3477	76.8663	42.7411	125.043	357.9	68.2891	357.9
1391363	ILMN_17245	CLUAP1	Homo sapiens clusterin associated protein 1 (CLUAP1), transcript variant 2, mRNA.	NM_024793.1	0.4782	0.617	1.28315	0.0272665	CLUAP1	5515	protein binding	CLUAP1	168.816	268.825	375.428	269.423	179.579	235.697	299.449	170.045	278.331	266.768	234.165	300.592	390.246	339.565	247.313	401.254	291.14	244.035	147.795	306.207	401.254
1383500	ILMN_28155	XPA	Homo sapiens xeroderma pigmentosum, complementation group A (XPA), mRNA.	NM_000380.2	0.47497	0.38797	-1.23104	0.0273095	XPA	0006289;0046872;0005515;0003684;0005634	nucleotide-excision repair ;metal ion binding ;protein binding ;damaged DNA binding ;nucleus	XPA	214.709	240.099	266.516	211.392	169.273	170.645	192.011	256.871	174.015	229.296	220.223	200.337	199.026	155.119	167.415	157.708	145.751	330.83	260.266	216.728	330.83
1386825	ILMN_23550	IRAK1	Homo sapiens interleukin-1 receptor-associated kinase 1 (IRAK1), transcript variant 2, mRNA.	NM_001025242.1	1.84685	1.5069	-1.23239	0.0273772	IRAK1	0007165;0007178;0046777;0045941;0006952;0007250;0006468;000166;000287;0004674;0016563;0005524;0004672;0005515;0004872;0019901;0016740;0004704;0042803;00045323	signal transduction ;transmembrane receptor protein serine/threonine kinase signaling pathway ;protein amino acid autophosphorylation ;positive regulation of transcription ;defense response ;activation of NF-kappaB-inducing kinase ;protein amino acid phosphorylation ;nucleotide binding ;magnesium ion binding ;protein serine/threonine kinase activity ;transcriptional activator activity ;ATP bindin…	IRAK1	974.035	1060.28	1290.16	1109.17	950.727	966.267	950.325	609.131	728.688	1120.95	849.665	806.386	947.377	646.825	766.331	483.755	614.295	960.144	847.993	907.797	1290.16
1380274	ILMN_5334	ADORA3	Homo sapiens adenosine A3 receptor (ADORA3), transcript variant 1, mRNA.	NM_020683.5	0.99178	0.59383	-1.6794	0.027393	ADORA3	0007165;0007186;0007190;0008016;0006954;0001613;0004872;0001584;0016020;0005887	signal transduction ;G-protein coupled receptor protein signaling pathway ;adenylate cyclase activation ;regulation of heart contraction rate ;inflammatory response ;A3 adenosine receptor activity G-protein coupled ;receptor activity ;rhodopsin-like receptor activity ;membrane ;integral to plasma membrane	ADORA3	246.936	197.549	539.515	231.816	668.732	953.827	381.735	431.655	151.328	327.909	292.353	352.397	331.305	431.222	276.625	339.382	356.461	785.985	569.855	109.552	953.827
1390235	ILMN_18922	PDK1	Homo sapiens pyruvate dehydrogenase kinase, isozyme 1 (PDK1), nuclear gene encoding mitochondrial protein, mRNA.	NM_002610.3	0.05511	0.0771	1.39136	0.0274138	PDK1	0006006;0007264;0006468;0016740;0004740;0005524;0005739	glucose metabolism ;small GTPase mediated signal transduction ;protein amino acid phosphorylation ;transferase activity ;[pyruvate dehydrogenase (lipoamide)] kinase activity ;ATP binding ;mitochondrion	PDK1	21.8936	20.1086	44.7373	22.6513	20.2144	26.2435	20.2692	27.2374	44.2805	35.3225	24.4068	53.6974	43.3178	31.2748	33.7245	43.7901	26.2569	64.2137	34.6716	48.2203	64.2137
1395946	ILMN_11937	SPTBN4	Homo sapiens spectrin, beta, non-erythrocytic 4 (SPTBN4), transcript variant 2, mRNA.	NM_025213.1	1.24103	1.48758	1.19206	0.0274281	SPTBN4	0051016;0007016;0016192;0003779;0030506;0005200;0016363;0005856;0008091;0016605;0016020;0005737	barbed-end actin filament capping ;cytoskeletal anchoring ;vesicle-mediated transport ;actin binding ;ankyrin binding ;structural constituent of cytoskeleton ;nuclear matrix ;cytoskeleton ;spectrin ;PML body ;membrane ;cytoplasm	SPTBN4	787.146	736.788	757.189	697.997	491.606	547.242	658.93	662.941	650.28	742.312	648.788	770.515	778.441	700.844	816.196	823.996	788.93	584.061	470.163	1036.09	1036.09
1380525	ILMN_5022	FLJ12886	Homo sapiens hypothetical protein FLJ12886 (FLJ12886), mRNA.	NM_019108.1	0.22029	0.27345	1.23449	0.027567	FLJ12886	0006511;000502	ubiquitin-dependent protein catabolism ;proteasome complex (sensu Eukaryota)	FLJ12886	105.555	80.3223	113.608	122.806	87.336	139.376	94.5028	89.0324	128.328	132.661	130.578	156.301	154.681	132.409	102.771	103.121	103.614	155.313	83.1663	159.423	159.423
1388204	ILMN_21573	POLH	Homo sapiens polymerase (DNA directed), eta (POLH), mRNA.	NM_006502.1	0.07627	0.09534	1.24304	0.0275744	POLH	0006282;0006260;0006281;0016740;000287;0015999;0003684;0005654	regulation of DNA repair ;DNA replication ;DNA repair ;transferase activity ;magnesium ion binding ;eta DNA polymerase activity ;damaged DNA binding ;nucleoplasm	POLH	44.8399	28.3197	42.6981	47.2358	46.2847	33.632	39.1508	39.5896	43.2508	39.0988	37.0442	49.3101	58.6307	47.2741	44.6847	48.9286	46.1607	38.0477	40.0534	53.5493	58.6307
1397152	ILMN_10359	SPAG5	Homo sapiens sperm associated antigen 5 (SPAG5), mRNA.	NM_006461.3	0.26988	0.36035	1.32788	0.027615	SPAG5	0051301;0007067;0007051;0048015;0007049;0005874	cell division ;mitosis ;spindle organization and biogenesis ;phosphoinositide-mediated signaling ;cell cycle ;microtubule	SPAG5	115.084	63.1642	148.826	88.027	141.48	174.515	121.983	186.092	134.952	220.284	116.722	172.68	243.719	205.6	118.155	208.674	168.405	148.448	125.079	146.693	243.719
1386396	ILMN_24057	RBMXL1	Homo sapiens RNA binding motif protein, X-linked-like 1 (RBMXL1), mRNA.	NM_019610.3	0.35382	0.22204	-1.60234	0.0276463	RBMXL1	3676	nucleic acid binding	RBMXL1	137.725	252.561	195.626	178.276	104.341	81.0714	133.346	145.212	131.218	80.9879	133.36	145.417	94.5845	79.026	90.0674	95.9171	110.587	135.094	341.807	103.031	341.807
1392883	ILMN_15148	MS4A7	Homo sapiens membrane-spanning 4-domains, subfamily A, member 7 (MS4A7), transcript variant 3, mRNA.	NM_206939.1	0.41245	0.20325	-2.04053	0.0277008	MS4A7	0007165;0004872;0016020;0016021	signal transduction ;receptor activity ;membrane ;integral to membrane	MS4A7	43.6946	79.9755	250.104	172.292	327.181	424.613	134.725	58.7281	83.2617	157.796	92.4609	78.966	91.789	205.446	67.434	33.3865	82.3161	253.514	302.269	83.2576	424.613
1378667	ILMN_758	FLJ46247	Homo sapiens FLJ46247 protein (FLJ46247), transcript variant 2, mRNA.	NM_001033562.1	0.09169	0.07146	-1.29019	0.0277264	FLJ46247	5509	calcium ion binding	FLJ46247	50.5725	37.119	32.6025	30.994	40.6534	39.1643	42.0262	55.5328	25.0367	26.9248	44.1635	31.95	36.4311	31.4758	35.3017	46.8379	23.9725	67.6538	83.7964	56.259	83.7964
1395221	ILMN_13131	C12orf59	Homo sapiens chromosome 12 open reading frame 59 (C12orf59), mRNA.	NM_153022.1	0.26684	0.15674	-1.71193	0.0277322	C12orf59	0004;0005554;0008372	biological process unknown ;molecular function unknown ;cellular component unknown	C12orf59	88.3757	163.101	203.415	255.975	89.615	141.025	89.2084	111.296	81.9861	45.4815	134.78	47.3222	79.6583	66.1831	88.4756	74.7454	71.334	79.5513	87.9446	64.4293	255.975
1387631	ILMN_22498	ACVR1B	Homo sapiens activin A receptor, type IB (ACVR1B), transcript variant 1, mRNA.	NM_004302.3	2.05363	2.57732	1.24809	0.0277656	ACVR1B	0006468;0007178;000166;0004872;0016740;0004674;0005524;0005024;0016020;0005887	protein amino acid phosphorylation ;transmembrane receptor protein serine/threonine kinase signaling pathway ;nucleotide binding ;receptor activity ;transferase activity ;protein serine/threonine kinase activity ;ATP binding ;transforming growth factor beta receptor activity ;membrane ;integral to plasma membrane	ACVR1B	1712.86	1262.52	1027.01	1119.53	1079.22	1130.47	1010.88	1253.28	1073.52	1399.59	1185.2	1150.98	1970.32	1299.87	1495.14	1748.96	1312.98	661.404	728.013	1189.24	1970.32
1385867	ILMN_24835	ACP6	Homo sapiens acid phosphatase 6, lysophosphatidic (ACP6), mRNA.	NM_016361.2	0.18979	0.27007	1.41519	0.0280348	ACP6	0003993;0016787	acid phosphatase activity ;hydrolase activity	ACP6	72.5369	43.7602	66.4797	96.5901	176.697	92.1673	105.955	102.003	128.07	96.4672	106.21	230.578	89.2728	150.665	131.713	129.731	106.031	104.813	79.0298	130.41	230.578
1380504	ILMN_4996	SLA	Homo sapiens Src-like-adaptor (SLA), mRNA.	NM_006748.1	0.4872	0.27077	-1.80931	0.0280404	SLA	0007242;0005070	intracellular signaling cascade ;SH3/SH2 adaptor activity	SLA	178.293	146.48	209.009	137.504	416.285	467.734	95.31	131.736	94.5008	202.647	101.58	145.879	155.757	125.336	180.396	82.9138	129.315	407.088	216.746	78.8172	467.734
1397313	ILMN_10143	NPIP	Homo sapiens nuclear pore complex interacting protein (NPIP), mRNA.	NM_006985.1	1.35331	1.8715	1.37528	0.0280747	NPIP	0007218;0016020;0016021	neuropeptide signaling pathway ;membrane ;integral to membrane	NPIP	495.421	264.863	1158.01	535.517	698.372	995.148	923.118	798.021	637.076	1235.18	911.187	1223.54	1224.48	746.292	809.517	1122.86	1224.27	456.435	667.802	736.948	1235.18
1382285	ILMN_2983	ZNF285	Homo sapiens zinc finger protein 285 (ZNF285), mRNA.	NM_152354.2	0.3766	0.46529	1.22866	0.0283043	ZNF285	0006355;0006350;0046872;0008270;0003677;0005634	regulation of transcription DNA-dependent ;transcription ;metal ion binding ;zinc ion binding ;DNA binding ;nucleus	ZNF285	147.709	197.387	129.907	172.618	214.041	221.507	236.734	237.065	254.089	266.565	206.307	275.58	193.662	228.236	180.728	238.732	227.438	121.886	160.144	196.555	275.58
1377211	ILMN_9551	KIAA0828	Homo sapiens KIAA0828 protein (KIAA0828), mRNA.	NM_015328.1	1.1019	1.49765	1.35166	0.0283073	KIAA0828	0006730;0016787;0004013	one-carbon compound metabolism ;hydrolase activity ;adenosylhomocysteinase activity	KIAA0828	691.464	460.404	440.69	535.205	915.791	569.821	715.677	501.644	610.533	1117.13	500.22	1118.24	596.811	782.754	839.196	631.279	735.004	503.764	321.146	853.145	1118.24
1382366	ILMN_29712	BXDC1	Homo sapiens brix domain containing 1 (BXDC1), mRNA.	NM_032194.1	2.97531	2.57256	-1.16296	0.0283963	BXDC1	5634	nucleus	BXDC1	1632.08	1525.43	1437.43	1450.72	1588.72	1498.91	1398.22	1889.15	1288.14	1314.02	1509.52	1340.15	1325.99	1518.65	1392.18	1514.74	1153.62	1528.19	2095.65	1375.37	2095.65
1381852	ILMN_3229	PARS2	Homo sapiens prolyl-tRNA synthetase (mitochondrial)(putative) (PARS2), mRNA.	NM_152268.2	0.07289	0.09513	1.29797	0.0284065	PARS2	0006412;0006426;0006433;000166;0004827;0004820;0005524;0016874;0005739	protein biosynthesis ;glycyl-tRNA aminoacylation ;prolyl-tRNA aminoacylation ;nucleotide binding ;proline-tRNA ligase activity ;glycine-tRNA ligase activity ;ATP binding ;ligase activity ;mitochondrion	PARS2	39.0604	36.1683	26.3357	39.6128	28.9528	44.9241	32.1047	42.1371	41.8705	30.532	52.4181	43.7993	53.6348	59.0834	49.5488	47.4473	44.4055	58.1647	38.5712	42.0733	59.0834
1390690	ILMN_18256	EDG3	Homo sapiens endothelial differentiation, sphingolipid G-protein-coupled receptor, 3 (EDG3), mRNA.	NM_005226.2	0.20829	0.13036	-1.60664	0.0284994	EDG3	0007165;0007186;0009653;0008284;0007204;0006954;0008289;0004872;0001619;0005887;0005886	signal transduction ;G-protein coupled receptor protein signaling pathway ;morphogenesis ;positive regulation of cell proliferation ;elevation of cytosolic calcium ion concentration ;inflammatory response ;lipid binding ;receptor activity ;lysosphingolipid and lysophosphatidic acid receptor activity ;integral to plasma membrane ;plasma membrane	EDG3	88.0131	46.0639	81.7388	54.793	112.575	103.932	89.7129	115.621	31.3783	72.6377	35.9721	86.951	60.479	71.4083	67.5644	80.697	50.7373	96.2759	222.228	68.1112	222.228
1385123	ILMN_2578	NOX1	Homo sapiens NADPH oxidase 1 (NOX1), transcript variant NOH-1L, mRNA.	NM_007052.3	0.06439	0.04247	-1.52451	0.0285719	NOX1	0006811;0006746;0006118;0015992;0006739;0046872;0005506;0030171;0016491;0016175;0016021;00016020	ion transport ;FADH2 metabolism ;electron transport ;proton transport ;NADP metabolism ;metal ion binding ;iron ion binding ;voltage-gated proton channel activity ;oxidoreductase activity ;superoxide-generating NADPH oxidase activity ;integral to membrane ;membrane	NOX1	35.9428	13.7599	41.4769	16.9885	22.6421	24.4913	31.149	41.8629	21.9033	27.3197	31.4253	19.2636	17.6718	10.0152	21.0737	12.8173	11.9121	47.3796	76.9444	41.3639	76.9444
1397131	ILMN_10336	AK3L2	Homo sapiens adenylate kinase 3-like 2 (AK3L2), mRNA.	NM_001002921.1	0.22991	0.3605	1.55934	0.0285969	AK3L2	0016338;0042802;0005198;0005923;0016020;0016021	calcium-independent cell-cell adhesion ;protein self binding ;structural molecule activity ;tight junction ;membrane ;integral to membrane	AK3L2	121.713	160.097	91.0791	149.431	140.431	109.756	195.899	46.74	163.609	198.974	74.1908	199.049	197.221	198.514	269.122	101.183	111.374	86.3887	25.0332	220.129	269.122
1382951	ILMN_2898	NR2F6	Homo sapiens nuclear receptor subfamily 2, group F, member 6 (NR2F6), mRNA.	NM_005234.3	1.01525	1.2325	1.20729	0.0287046	NR2F6	0006355;0007165;0006350;0046872;0003707;0003700;0004887;0005634	regulation of transcription DNA-dependent ;signal transduction ;transcription ;metal ion binding ;steroid hormone receptor activity ;transcription factor activity ;thyroid hormone receptor activity ;nucleus	NR2F6	523.89	551.331	440.681	547.653	518.527	656.045	549.362	557.741	532.794	683.8	552.232	447.549	814.805	813.672	573.874	583.393	682.532	485.899	340.413	697.759	814.805
1389607	ILMN_19822	ATP8B2	Homo sapiens ATPase, Class I, type 8B, member 2 (ATP8B2), transcript variant 2, mRNA.	NM_001005855.1	0.03509	0.06318	1.79038	0.0288315	ATP8B2	0006812;000166;000287;0004012;0016787;0016887;0005524;0015662;0016021;00016020	cation transport ;nucleotide binding ;magnesium ion binding ;phospholipid-translocating ATPase activity ;hydrolase activity ;ATPase activity ;ATP binding ;ATPase activity coupled to transmembrane movement of ions phosphorylative mechanism ;integral to membrane ;membrane	ATP8B2	4.06855	2.72899	30.2257	21.4411	39.0216	12.7265	24.8355	15.0411	29.4301	51.6479	26.4223	53.6141	15.3117	39.2849	24.9161	22.8465	26.6904	5.46835	18.823	19.8897	53.6141
1383032	ILMN_28859	PFAAP5	Homo sapiens phosphonoformate immuno-associated protein 5 (PFAAP5), mRNA.	NM_014887.1	0.85534	0.60314	-1.42601	0.0288926	PFAAP5	0004;0005554;0008372	biological process unknown ;molecular function unknown ;cellular component unknown	PFAAP5	223.025	318.549	540.613	375.924	726.668	282.73	455.806	282.589	363.372	157.873	421.05	339.303	173.83	316.152	318.678	260.916	360.79	503.016	576.852	287.705	726.668
1387235	ILMN_23016	C3orf35	Homo sapiens chromosome 3 open reading frame 35 (C3orf35), transcript variant E, mRNA.	NM_178342.1	0.06814	0.05363	-1.27749	0.0288932	C3orf35	0006811;0006816;0007528;0005245;0005509;0005891;0005624	ion transport ;calcium ion transport ;neuromuscular junction development ;voltage-gated calcium channel activity ;calcium ion binding ;voltage-gated calcium channel complex ;membrane fraction	C3orf35	34.5197	24.8136	28.3632	25.6128	30.8707	32.2283	39.0864	42.942	25.9796	13.8261	19.8537	21.7742	23.1121	24.4212	30.3178	29.8538	26.1721	56.1429	55.4793	57.1119	57.1119
1379156	ILMN_6926	HDHD1A	Homo sapiens haloacid dehalogenase-like hydrolase domain containing 1A (HDHD1A), mRNA.	NM_012080.3	0.39437	0.51495	1.29855	0.0289508	HDHD1A	0008152;0003824;0008372	metabolism ;catalytic activity ;cellular component unknown	HDHD1A	132.773	205.867	195.745	274.872	167.652	224.858	201.268	212.413	222.782	197.596	322.792	277.718	371.512	233.27	299.724	148.665	247.261	177.741	133.182	207.41	371.512
1377519	ILMN_9074	ARHGDIB	Homo sapiens Rho GDP dissociation inhibitor (GDI) beta (ARHGDIB), mRNA.	NM_001175.4	4.49491	2.79937	-1.61459	0.0289723	ARHGDIB	0006955;0007275;0007162;0007266;0030036;0006928;0005094;0005096;0005856;0005737;0016023	immune response ;development ;negative regulation of cell adhesion ;Rho protein signal transduction ;actin cytoskeleton organization and biogenesis ;cell motility ;Rho GDP-dissociation inhibitor activity ;GTPase activator activity ;cytoskeleton ;cytoplasm ;cytoplasmic membrane-bound vesicle	ARHGDIB	1480.12	1453.41	1551.43	1666.27	3090.93	3391.28	1840	2090.52	1091.72	2367.32	1541.84	1388.09	1522.79	1838.93	1460.86	935.775	1406.33	5037.55	3241.62	1356.24	5037.55
1397385	ILMN_10028	LOC149134	Homo sapiens hypothetical protein LOC149134 (LOC149134), mRNA.	NM_207326.1	0.20122	0.30302	1.49758	0.0290627	LOC149134	000105;0008652;0009396;0006730;0009086;0006164;000166;0016787;0004477;0004329;0004488;0016491;0005524;0016874;0005739	histidine biosynthesis ;amino acid biosynthesis ;folic acid and derivative biosynthesis ;one-carbon compound metabolism ;methionine biosynthesis ;purine nucleotide biosynthesis ;nucleotide binding ;hydrolase activity ;methenyltetrahydrofolate cyclohydrolase activity ;formate-tetrahydrofolate ligase activity ;methylenetetrahydrofolate dehydrogenase (NADP+) activity ;oxidoreductase activity ;ATP bi…	LOC149134	124.332	43.654	76.9421	76.678	127.681	92.5183	137.78	180.65	102.586	172.49	94.4957	172.237	136.82	138.015	109.936	244.619	117.353	60.3386	65.6577	156.8	244.619
1393002	ILMN_15085	LYPLA2	Homo sapiens lysophospholipase II (LYPLA2), mRNA.	NM_007260.2	0.13249	0.17428	1.30812	0.0290778	LYPLA2	0006631;0006629;0003824;0016787	fatty acid metabolism ;lipid metabolism ;catalytic activity ;hydrolase activity	LYPLA2	77.65	77.7471	74.0981	53.6017	72.4304	68.4615	58.5657	42.6957	66.9079	86.9669	113.046	58.332	73.4606	82.5896	96.5395	68.139	70.0238	84.7416	51.0242	113.843	113.843
1390941	ILMN_17962	KIFC2	Homo sapiens kinesin family member C2 (KIFC2), mRNA.	NM_145754.2	4.73449	5.80821	1.22002	0.0291538	KIFC2	0007018;000166;0003777;0005524;0005875;0005874	microtubule-based movement ;nucleotide binding ;microtubule motor activity ;ATP binding ;microtubule associated complex ;microtubule	KIFC2	2840.73	1867.2	3123.63	2095.73	2418.32	3179.13	3378.97	2674.5	2118.87	4354.55	2753.79	3215.72	3468	2459.35	3274.65	4002.34	3293.27	2452.87	2100.24	3510.52	4354.55
1388960	ILMN_20666	NEURL2	Homo sapiens neuralized-like 2 (Drosophila) (NEURL2), mRNA.	NM_080749.2	0.04634	0.06918	1.4845	0.0292354	NEURL2	0007242;0006512	intracellular signaling cascade ;ubiquitin cycle	NEURL2	36.4353	26.3174	41.514	15.8292	19.8846	19.877	23.3993	6.38926	30.4413	55.5526	37.205	34.554	18.3779	37.8366	28.1696	43.0027	28.9391	27.999	21.2316	28.1767	55.5526
1391078	ILMN_1772	BMP6	Homo sapiens bone morphogenetic protein 6 (BMP6), mRNA.	NM_001718.2	0.30952	0.20542	-1.51517	0.0292594	BMP6	0040007;0051216;0030154;0001503;0005125;0008083;0005615	growth ;cartilage development ;cell differentiation ;ossification ;cytokine activity ;growth factor activity ;extracellular space	BMP6	164.674	63.0393	159.462	223.93	120.003	164.749	169.076	197.566	66.9657	113.999	98.2112	104.393	52.5616	85.3312	56.9628	73.0329	94.3415	101.275	149.199	226.495	226.495
1383567	ILMN_28025	MST1	Homo sapiens macrophage stimulating 1 (hepatocyte growth factor-like) (MST1), mRNA.	NM_020998.2	0.32492	0.4283	1.31093	0.0292958	MST1	0007596;0006508;0005509;0004252;0008372	blood coagulation ;proteolysis and peptidolysis ;calcium ion binding ;serine-type endopeptidase activity ;cellular component unknown	MST1	85.9924	68.5222	136.119	137.207	180.117	172.526	158.135	183.313	163.549	276.808	160.22	262.445	207.925	214.359	180.641	267.576	194.821	200.37	249.191	157.55	276.808
1381360	ILMN_3929	GMPPB	Homo sapiens GDP-mannose pyrophosphorylase B (GMPPB), transcript variant 2, mRNA.	NM_021971.1	0.08805	0.06384	-1.38701	0.0293793	GMPPB	0009058;0016779	biosynthesis ;nucleotidyltransferase activity	GMPPB	22.5418	42.8701	30.3355	40.0082	56.7622	55.0643	37.6716	39.5648	31.8245	23.1748	28.8415	24.0207	30.8389	28.3498	27.2549	47.0732	34.6432	79.7458	57.7308	45.0931	79.7458
1384179	ILMN_27087	BPESC1	Homo sapiens blepharophimosis, epicanthus inversus and ptosis, candidate 1 (BPESC1), mRNA.	NM_021812.1	0.0532	0.04152	-1.2884	0.0293944	BPESC1	0004;0005529;0008372	biological process unknown ;sugar binding ;cellular component unknown	BPESC1	28.0532	21.542	20.4553	12.8589	24.6861	23.814	29.1489	34.5393	21.7405	17.6193	13.1036	28.427	15.7613	23.6466	16.8544	20.2952	17.4732	46.1383	54.1913	35.6527	54.1913
1380795	ILMN_4735	OASL	Homo sapiens 2'-5'-oligoadenylate synthetase-like (OASL), transcript variant 1, mRNA.	NM_003733.2	0.04808	0.03476	-1.39075	0.0294891	OASL	0006955;0006464;0003725;0046966;0003677;0016740;0005524;0005730;0005737	immune response ;protein modification ;double-stranded RNA binding ;thyroid hormone receptor binding ;DNA binding ;transferase activity ;ATP binding ;nucleolus ;cytoplasm	OASL	17.5512	23.1084	24.762	14.674	15.8121	16.5226	26.1817	22.1913	10.8352	14.5417	14.6445	18.7539	19.7377	18.5802	13.7322	20.1572	17.0364	51.8023	56.7404	27.3392	56.7404
1397404	ILMN_1006	SEZ6L2	Homo sapiens seizure related 6 homolog (mouse)-like 2 (SEZ6L2), transcript variant 2, mRNA.	NM_201575.1	0.30637	0.41406	1.34404	0.02951	SEZ6L2	0004872;0016021	receptor activity ;integral to membrane	SEZ6L2	190.323	193.968	98.4373	164.167	139.755	108.772	131.94	178.688	202.858	172.707	210.749	120.695	166.677	126.399	228.361	280.234	215.73	172.497	109.313	274.892	280.234
1379469	ILMN_6475	NACAL	Homo sapiens nascent-polypeptide-associated complex alpha polypeptide-like (NACAL), mRNA.	NM_199290.2	0.08225	0.05247	-1.5763	0.029684	NACAL	0006810;0005215	transport ;transporter activity	NACAL	20.0896	32.967	32.563	15.3453	28.675	31.1973	56.7053	65.2708	15.9341	31.3894	17.875	17.1418	14.5054	32.1918	17.43	39.4698	28.7884	80.7531	74.421	54.2385	80.7531
1382698	ILMN_29291	SLC1A5	Homo sapiens solute carrier family 1 (neutral amino acid transporter), member 5 (SLC1A5), mRNA.	NM_005628.1	0.09577	0.03802	-2.53292	0.0296974	SLC1A5	0006810;0015804;0006835;0017153;0015175;0004872;0015293;0005624;0016020;0005887	transport ;neutral amino acid transport ;dicarboxylic acid transport ;sodium:dicarboxylate symporter activity ;neutral amino acid transporter activity ;receptor activity ;symporter activity ;membrane fraction ;membrane ;integral to plasma membrane	SLC1A5	31.7645	8.52611	35.7162	16.2239	58.6734	87.1904	26.6781	33.7283	12.6196	22.4748	8.88402	13.3609	32.5639	12.3454	24.9134	11.5779	30.4834	130.269	68.9673	18.578	130.269
1394055	ILMN_138558	ABCC11	Homo sapiens ATP-binding cassette, sub-family C (CFTR/MRP), member 11 (ABCC11), transcript variant 2, mRNA.	NM_033151.2	0.05405	0.03081	-1.76389	0.0298617	ABCC11	0006810;0016887;000166;0005524;0042626;0016021	transport ;ATPase activity ;nucleotide binding ;ATP binding ;ATPase activity coupled to transmembrane movement of substances ;integral to membrane	ABCC11	18.844	15.5209	22.5931	26.7795	30.569	18.0788	21.0825	6.58527	19.3405	16.0806	9.08759	12.9442	19.9985	10.6958	4.14564	25.2061	11.2941	65.6174	69.331	23.9281	69.331
1386722	ILMN_2363	PRTN3	Homo sapiens proteinase 3 (serine proteinase, neutrophil, Wegener granulomatosis autoantigen) (PRTN3), mRNA.	NM_002777.3	0.11513	0.06403	-1.80792	0.0299614	PRTN3	0008284;0006508;0030574;0004252;0005515;0008372	positive regulation of cell proliferation ;proteolysis and peptidolysis ;collagen catabolism ;serine-type endopeptidase activity ;protein binding ;cellular component unknown	PRTN3	34.6477	53.2867	49.2136	60.8722	35.0388	21.5363	51.4392	42.0964	33.2522	48.7282	21.7721	27.5978	28.4514	19.2383	31.3325	21.371	45.3153	99.271	141.383	45.8202	141.383
1384841	ILMN_26242	CPXM	Homo sapiens carboxypeptidase X (M14 family) (CPXM), mRNA.	NM_019609.3	0.07316	0.03932	-1.87093	0.0299949	CPXM	0006508;0007155;0046872;0004182;0008237;0004180	proteolysis and peptidolysis ;cell adhesion ;metal ion binding ;carboxypeptidase A activity ;metallopeptidase activity ;carboxypeptidase activity	CPXM	8.61022	18.4384	21.841	69.8623	48.4469	20.7975	55.6397	40.6964	9.49545	38.4156	14.5294	13.8163	8.98094	14.5164	33.0789	25.1629	2.84415	54.7248	51.9672	37.8346	69.8623
1378329	ILMN_7992	TMEM74	Homo sapiens transmembrane protein 74 (TMEM74), mRNA.	NM_153015.1	0.49158	0.67032	1.35609	0.0300024	TMEM74	0008152;0008211;0006629;0016491;0003845;0005789;0005792;0016021;0016020	metabolism ;glucocorticoid metabolism ;lipid metabolism ;oxidoreductase activity ;11-beta-hydroxysteroid dehydrogenase activity ;endoplasmic reticulum membrane ;microsome ;integral to membrane ;membrane	TMEM74	240.228	223.632	190.598	236.521	184.993	189.4	247.694	328.26	225.57	292.496	242.991	346.44	271.28	341.105	298.562	511.693	279.517	318.407	238.378	520.87	520.87
1377511	ILMN_9066	DBX2	Homo sapiens developing brain homeobox 2 (DBX2), mRNA.	NM_001004329.1	0.04356	0.0272	-1.61032	0.0300491	DBX2	0006355;0003700;0005634	regulation of transcription DNA-dependent ;transcription factor activity ;nucleus	DBX2	24.5406	27.4661	14.9346	11.6864	19.1195	19.4493	4.60881	24.0799	11.2955	30.858	8.06603	5.1832	17.9252	2.80351	14.8757	16.2607	12.4694	37.2299	57.2578	8.46159	57.2578
1378011	ILMN_843	FLJ21075	Homo sapiens hypothetical protein FLJ21075 (FLJ21075), mRNA.	NM_025031.1	0.03648	0.0532	1.45051	0.0302464	FLJ21075	0008285;0006968;0005509;0005615;0019898	negative regulation of cell proliferation ;cellular defense response ;calcium ion binding ;extracellular space ;extrinsic to membrane	FLJ21075	8.36249	19.017	21.4472	17.252	10.5854	21.3926	22.2009	29.8007	15.3388	22.3428	20.7603	17.0754	44.1052	30.8728	19.6694	24.0457	23.8449	26.7965	19.239	53.8793	53.8793
1386688	ILMN_23796	FAM5B	Homo sapiens family with sequence similarity 5, member B (FAM5B), mRNA.	NM_021165.1	1.12676	1.38254	1.22024	0.0303234	FAM5B	0006916;0006355;0007275;0003676;0005622;0005634	anti-apoptosis ;regulation of transcription DNA-dependent ;development ;nucleic acid binding ;intracellular ;nucleus	FAM5B	803.955	682.538	563.987	619.178	454.649	406.885	724.653	511.995	618.862	626.035	535.195	632.509	758.183	731.011	804.34	968.76	801.767	585.105	423.618	727.65	968.76
1395038	ILMN_13297	POLR3G	Homo sapiens polymerase (RNA) III (DNA directed) polypeptide G (32kD) (POLR3G), mRNA.	NM_006467.1	0.10667	0.07368	-1.45587	0.0303497	POLR3G	0006359;0006350;0003899;0016740;0005666;0005634	regulation of transcription from RNA polymerase III promoter ;transcription ;DNA-directed RNA polymerase activity ;transferase activity ;DNA-directed RNA polymerase III complex ;nucleus	POLR3G	43.8113	76.0136	46.6223	40.0596	31.5286	36.4011	43.881	73.3457	37.9185	45.9804	25.3465	63.2815	44.8457	27.4007	30.9387	26.4131	16.6397	64.6048	90.0956	49.5631	90.0956
1392507	ILMN_15738	ADRA1D	Homo sapiens adrenergic, alpha-1D-, receptor (ADRA1D), mRNA.	NM_000678.2	0.23917	0.19267	-1.24824	0.0303844	ADRA1D	0008283;0007267;0007165;0007186;0007275;0008284;0007188;0006259;0004935;0004937;0004872;0001584;0005887	cell proliferation ;cell-cell signaling ;signal transduction ;G-protein coupled receptor protein signaling pathway ;development ;positive regulation of cell proliferation ;G-protein signaling coupled to cAMP nucleotide second messenger ;DNA metabolism ;adrenoceptor activity ;alpha1-adrenergic receptor activity ;receptor activity ;rhodopsin-like receptor activity ;integral to plasma membrane	ADRA1D	94.5985	76.2166	122.442	101.134	105.485	101.615	101.869	126.819	73.7673	100.715	69.9007	79.2094	82.0744	76.4135	86.0568	120.974	88.4569	130.607	191.553	129.677	191.553
1381110	ILMN_4259	LOC51333	Homo sapiens mesenchymal stem cell protein DSC43 (LOC51333), mRNA.	NM_016643.1	0.08938	0.12266	1.36483	0.0304001	LOC51333	0003676;0008270;0005634	nucleic acid binding ;zinc ion binding ;nucleus	LOC51333	50.2355	29.8582	50.1089	46.8319	37.6241	44.067	40.5338	49.7953	28.6564	74.757	27.5288	42.4302	79.3696	74.5642	73.8162	64.7318	55.1631	65.3721	54.2647	67.4465	79.3696
1391708	ILMN_16845	WDR6	Homo sapiens WD repeat domain 6 (WDR6), mRNA.	NM_018031.2	2.86584	3.44147	1.19424	0.0304618	WDR6	0004;0005554;0008372	biological process unknown ;molecular function unknown ;cellular component unknown	WDR6	1556.95	1503.89	1220.48	1281.14	1588.27	1696.92	1859.38	1217.39	1632.7	2073.72	1183.89	1937.13	1911.47	1886.07	1917.04	2276.76	1724.32	2040.75	1485.08	2007.49	2276.76
1395601	ILMN_12568	FLRT3	Homo sapiens fibronectin leucine rich transmembrane protein 3 (FLRT3), transcript variant 1, mRNA.	NM_013281.2	1.67194	2.44381	1.45361	0.0305389	FLRT3	0007155;0005057;0030674;0005578;0016020;0005887	cell adhesion ;receptor signaling protein activity ;protein binding bridging ;extracellular matrix (sensu Metazoa) ;membrane ;integral to plasma membrane	FLRT3	883.686	1715.49	983.232	1377.93	920.58	1013.6	936.131	735.593	1294.55	1011.22	1592.48	851.002	2001.93	1503.91	1312.7	1323.65	1548.43	258.978	209.751	677.083	2001.93
1386675	ILMN_23782	MTHFD2	Homo sapiens methylenetetrahydrofolate dehydrogenase (NADP+ dependent) 2, methenyltetrahydrofolate cyclohydrolase (MTHFD2), nuclear gene encoding mitochondrial protein, mRNA.	NM_006636.2	0.24808	0.13109	-1.90294	0.0305792	MTHFD2	0009396;0006730;0004487;000287;0016787;0004477;0005489;0016491;0005739	folic acid and derivative biosynthesis ;one-carbon compound metabolism ;methylenetetrahydrofolate dehydrogenase (NAD+) activity ;magnesium ion binding ;hydrolase activity ;methenyltetrahydrofolate cyclohydrolase activity ;electron transporter activity ;oxidoreductase activity ;mitochondrion	MTHFD2	104.752	36.4726	107.57	58.7849	207.074	245.616	45.5353	87.8531	42.8451	111.242	55.2381	72.122	88.2255	69.4587	58.4531	38.2803	41.5613	182.311	141.14	50.1128	245.616
1396148	ILMN_1179	DCN	Homo sapiens decorin (DCN), transcript variant B, mRNA.	NM_133504.2	3.74672	2.45806	-1.53271	0.0305847	DCN	0009887;0005578	organ morphogenesis ;extracellular matrix (sensu Metazoa)	DCN	1521.08	1445.15	1349.34	2907.67	3658.99	1317.15	2334.02	2061.02	1147.27	1363.8	1326.49	1375.43	652.4	1453.77	1245.19	1057.35	1349.65	1077.43	2568.82	2046.1	3658.99
1388996	ILMN_20481	ADAR	Homo sapiens adenosine deaminase, RNA-specific (ADAR), transcript variant 2, mRNA.	NM_015840.2	6.22339	7.05304	1.12706	0.030604	ADAR	0006397;0006396;0016547;0019735;0003725;0046872;0003726;0016787;0003677;0005737;0005634	mRNA processing ;RNA processing ;RNA editing ;antimicrobial humoral response (sensu Vertebrata) ;double-stranded RNA binding ;metal ion binding ;double-stranded RNA adenosine deaminase activity ;hydrolase activity ;DNA binding ;cytoplasm ;nucleus	ADAR	4229.32	3643.82	3369.87	3209.22	2998.55	3643.6	3809.11	4079.43	3927.46	3788.16	3448.84	3286.33	4164.6	4136.67	4017.52	5125.28	4616.43	3357.04	2961.73	3342.34	5125.28
1395057	ILMN_13328	PTGER4	Homo sapiens prostaglandin E receptor 4 (subtype EP4) (PTGER4), mRNA.	NM_000958.2	0.14731	0.09542	-1.55234	0.0306276	PTGER4	0006955;0007165;0007188;0007186;0001584;0004957;0004872;0016021	immune response ;signal transduction ;G-protein signaling coupled to cAMP nucleotide second messenger ;G-protein coupled receptor protein signaling pathway ;rhodopsin-like receptor activity ;prostaglandin E receptor activity ;receptor activity ;integral to membrane	PTGER4	45.4884	43.6653	74.0035	126.094	106.822	65.5275	52.0342	42.224	49.6366	44.9525	69.3869	48.7735	40.9891	35.661	54.1434	21.1321	45.4989	82.9648	105.255	58.2558	126.094
1390190	ILMN_1887	TREM2	Homo sapiens triggering receptor expressed on myeloid cells 2 (TREM2), mRNA.	NM_018965.1	0.14896	0.06191	-2.41931	0.0306674	TREM2	0006959;0004872;0016021	humoral immune response ;receptor activity ;integral to membrane	TREM2	31.4061	33.878	76.6486	35.9484	159.109	171.455	43.5827	34.7844	15.7767	54.2496	20.273	22.5158	48.1919	39.8632	25.9096	26.8949	30.3203	106.428	73.4015	25.5448	171.455
1389835	ILMN_19472	SUV420H2	Homo sapiens suppressor of variegation 4-20 homolog 2 (Drosophila) (SUV420H2), mRNA.	NM_032701.2	0.57492	0.74431	1.28749	0.0307577	SUV420H2	0009231;0016740;0008531;000287;0008270;0005737	riboflavin biosynthesis ;transferase activity ;riboflavin kinase activity ;magnesium ion binding ;zinc ion binding ;cytoplasm	SUV420H2	254.015	140.683	188.576	249.599	363.503	336.542	224.989	275.503	329.608	392.369	321.895	465.887	336.677	382.502	269.112	477.969	310.504	362.087	431.891	435.686	477.969
1391518	ILMN_17242	ATG7	Homo sapiens ATG7 autophagy related 7 homolog (S. cerevisiae) (ATG7), mRNA.	NM_006395.1	1.21676	1.07068	-1.14273	0.0307643	ATG7	0031401;0006512;0006944;0006914;0006497;0015031;0004839;0003824;0005737	positive regulation of protein modification ;ubiquitin cycle ;membrane fusion ;autophagy ;protein amino acid lipidation ;protein transport ;ubiquitin activating enzyme activity ;catalytic activity ;cytoplasm	ATG7	616.474	678.957	575.365	677.862	481.605	526.995	777.099	603.805	557.349	457.576	486.998	481.875	499.091	615.283	626.746	607.099	557.081	707.035	595.591	600.261	777.099
1393986	ILMN_138742	MMP16	Homo sapiens matrix metalloproteinase 16 (membrane-inserted) (MMP16), transcript variant 2, mRNA.	NM_022564.1	0.05461	0.06974	1.27015	0.030832	MMP16	0030574;0004222;0008047;0008270;0005578;0005887;0005886	collagen catabolism ;metalloendopeptidase activity ;enzyme activator activity ;zinc ion binding ;extracellular matrix (sensu Metazoa) ;integral to plasma membrane ;plasma membrane	MMP16	27.6924	15.6888	29.4946	28.4978	13.569	21.1246	24.3086	37.6854	24.8569	38.8987	42.0338	25.9482	35.1387	36.2413	28.6231	41.0548	36.1365	59.7882	45.4556	41.9467	59.7882
1396344	ILMN_11416	MGC52057	Homo sapiens hypothetical protein MGC52057 (MGC52057), mRNA.	NM_194317.2	0.36019	0.48247	1.33211	0.0309001	MGC52057	5509	calcium ion binding	MGC52057	112.253	166.591	202.023	278.554	194.2	138.326	265.639	118.217	209.258	297.025	220.054	293.184	206.706	195.407	274.956	202.185	191.237	210.67	80.2794	258.545	297.025
1377366	ILMN_9310	CACNA1E	Homo sapiens calcium channel, voltage-dependent, alpha 1E subunit (CACNA1E), mRNA.	NM_000721.2	1.14414	1.48736	1.29282	0.0309805	CACNA1E	0007268;0006812;0006816;0005245;0005509;0005891;0016020;0016021	synaptic transmission ;cation transport ;calcium ion transport ;voltage-gated calcium channel activity ;calcium ion binding ;voltage-gated calcium channel complex ;membrane ;integral to membrane	CACNA1E	786.398	542.849	397.5	678.617	580.013	535.138	733.654	918.731	841.64	855.219	573.22	647.507	1045.83	691.099	664.684	932.779	914.841	352.005	384.394	639.351	1045.83
1387181	ILMN_22943	DDOST	Homo sapiens dolichyl-diphosphooligosaccharide-protein glycosyltransferase (DDOST), mRNA.	NM_005216.3	2.56005	2.10994	-1.22006	0.0310255	DDOST	0018279;0004579;0016740;0005789;0016020;0016021	protein amino acid N-linked glycosylation via asparagine ;dolichyl-diphosphooligosaccharide-protein glycotransferase activity ;transferase activity ;endoplasmic reticulum membrane ;membrane ;integral to membrane	DDOST	1163.09	1172.71	1318.92	1322.16	1138.27	1329.12	1242.97	1548.43	1133.98	1174.38	1101.7	827.448	847.899	1068.62	1296.03	1339.3	1103.29	2055.1	1426.81	1292.72	2055.1
1388412	ILMN_2142	PRG1	Homo sapiens proteoglycan 1, secretory granule (PRG1), mRNA.	NM_002727.2	2.69839	1.31847	-2.05794	0.0311145	PRG1	0005102;0016020;0005856	receptor binding ;membrane ;cytoskeleton	PRG1	1097.31	496.568	1005.22	717.717	2155.93	1986.97	999.549	1824.27	437.28	693.807	531.422	989.443	599.962	723.342	435.405	273.684	569.849	699.732	3332.63	1503.39	3332.63
1385995	ILMN_24587	TGFBI	Homo sapiens transforming growth factor, beta-induced, 68kDa (TGFBI), mRNA.	NM_000358.1	0.5813	0.2263	-2.58294	0.0312564	TGFBI	0008283;0007600;0007162;0007601;0007155;0005178;0005515;0005578;0005615	cell proliferation ;sensory perception ;negative regulation of cell adhesion ;visual perception ;cell adhesion ;integrin binding ;protein binding ;extracellular matrix (sensu Metazoa) ;extracellular space	TGFBI	130.784	128.411	136.066	489.229	720.657	586.391	234.661	60.668	77.4856	162.856	94.6974	124.94	142.172	130.59	106.707	113.391	53.7199	94.8846	371.638	68.8995	720.657
1393422	ILMN_14309	CXorf2	Homo sapiens chromosome X open reading frame 2 (CXorf2), mRNA.	NM_001586.1	0.06013	0.04058	-1.48992	0.0312912	CXorf2	0004;0005554;0016021	biological process unknown ;molecular function unknown ;integral to membrane	CXorf2	32.7371	29.9704	32.0128	11.7363	11.3237	22.7705	33.3017	41.9892	8.79504	28.4241	31.5221	18.906	7.71247	22.464	21.9579	15.8003	18.0671	66.426	47.3076	30.7267	66.426
1386016	ILMN_24611	STAMBP	Homo sapiens STAM binding protein (STAMBP), transcript variant 3, mRNA.	NM_213622.1	0.05804	0.03874	-1.50644	0.0313184	STAMBP	0008284;0006512;0007259;0046872;0004221;0008237;0005515;0016020;0005634	positive regulation of cell proliferation ;ubiquitin cycle ;JAK-STAT cascade ;metal ion binding ;ubiquitin thiolesterase activity ;metallopeptidase activity ;protein binding ;membrane ;nucleus	STAMBP	24.6751	26.5075	22.1639	16.1534	32.6624	23.5314	26.0195	38.1044	5.27746	40.8115	17.1687	13.0842	6.0622	-0.24131	22.4921	22.8338	25.3378	59.7409	50.8708	44.2209	59.7409
1393486	ILMN_14408	MXRA7	Homo sapiens matrix-remodelling associated 7 (MXRA7), transcript variant 3, mRNA.	NM_198530.2	0.08552	0.10211	1.18744	0.0313411	MXRA7	0016020;0016021	membrane ;integral to membrane	MXRA7	41.0274	40.0761	46.6736	41.7377	33.871	34.1192	46.2596	47.5325	49.5689	47.7516	43.4113	46.9418	56.2931	58.7275	33.8113	49.0256	44.7517	72.296	47.0605	71.0458	72.296
1379868	ILMN_5895	CDKN1A	Homo sapiens cyclin-dependent kinase inhibitor 1A (p21, Cip1) (CDKN1A), transcript variant 2, mRNA.	NM_078467.1	1.66864	0.55064	-3.04713	0.0314284	CDKN1A	0008629;0007050;0007049;00079;0008285;0046872;0004672;0004861;0016301;0005515;0008270;0005634	induction of apoptosis by intracellular signals ;cell cycle arrest ;cell cycle ;regulation of cyclin dependent protein kinase activity ;negative regulation of cell proliferation ;metal ion binding ;protein kinase activity ;cyclin-dependent protein kinase inhibitor activity ;kinase activity ;protein binding ;zinc ion binding ;nucleus	CDKN1A	993.347	163.731	357.231	238.75	1281.29	970.634	288.417	340.763	145.557	300.292	164.833	406.366	258.449	319.133	174.896	221.983	183.236	1718.67	2288.23	526.404	2288.23
1389624	ILMN_19622	DZIP3	Homo sapiens zinc finger DAZ interacting protein 3 (DZIP3), mRNA.	NM_014648.2	0.24596	0.31341	1.26724	0.0314513	DZIP3	0016567;0004842;0008270;0003723;0016874;000151	protein ubiquitination ;ubiquitin-protein ligase activity ;zinc ion binding ;RNA binding ;ligase activity ;ubiquitin ligase complex	DZIP3	114.446	147.622	74.8535	150.697	136.69	128.558	110.224	146.549	141.676	155.09	132.487	144.423	189.364	152.626	133.643	161.979	181.438	112.75	76.26	112.773	189.364
1392706	ILMN_15566	ZNF511	Homo sapiens zinc finger protein 511 (ZNF511), mRNA.	NM_145806.2	1.08375	1.26716	1.16279	0.0315078	ZNF511	0003676;0008270;0005634	nucleic acid binding ;zinc ion binding ;nucleus	ZNF511	664.064	501.745	399.495	679.698	571.139	695.004	537.33	506.149	590.462	647.955	651.421	549.85	725.948	659.094	585.547	732.777	656.92	586.107	409.583	761.642	761.642
1385936	ILMN_24717	COQ6	Homo sapiens coenzyme Q6 homolog, monooxygenase (yeast) (COQ6), transcript variant 2, mRNA.	NM_182480.1	0.40187	0.45288	1.1207	0.0315735	COQ6	0006118;0008152;0006744;0006725;0050660;0004497;0015997	electron transport ;metabolism ;ubiquinone biosynthesis ;aromatic compound metabolism ;FAD binding ;monooxygenase activity ;ubiquinone biosynthesis monooxygenase activity	COQ6	193.395	173.15	240.542	162.76	192.228	202.223	233.904	190.732	204.026	236.885	212.919	197.715	205.348	223.675	246.738	248.401	213.438	171.409	195.067	210.053	248.401
1383038	ILMN_28867	C3orf15	Homo sapiens chromosome 3 open reading frame 15 (C3orf15), mRNA.	NM_033364.2	0.33139	0.45683	1.37093	0.0316518	C3orf15	5739	mitochondrion	C3orf15	127.738	79.9792	141.601	168.997	250.738	227.605	216.799	238.136	211.818	252.914	177.564	213.709	190.427	266.518	230.134	229.664	289.959	94.2691	81.5019	166.606	289.959
1378290	ILMN_8146	NCF2	Homo sapiens neutrophil cytosolic factor 2 (65kDa, chronic granulomatous disease, autosomal 2) (NCF2), mRNA.	NM_000433.2	0.07943	0.05408	-1.47693	0.0317296	NCF2	0006801;0006968;0005489;0005488;0005515;0005829;0005625	superoxide metabolism ;cellular defense response ;electron transporter activity ;binding ;protein binding ;cytosol ;soluble fraction	NCF2	40.4287	15.5178	68.8016	42.4438	45.1378	34.4962	21.5217	57.5867	22.9318	40.3427	19.8554	21.1357	32.1289	24.511	16.1881	27.2908	40.6989	46.5129	47.6617	29.4297	68.8016
1393175	ILMN_14887	POLD4	Homo sapiens polymerase (DNA-directed), delta 4 (POLD4), mRNA.	NM_021173.2	0.11391	0.0905	-1.26561	0.0317433	POLD4	0006260;0016740;0005515;0003891;0005634	DNA replication ;transferase activity ;protein binding ;delta DNA polymerase activity ;nucleus	POLD4	34.2817	40.212	65.9452	40.4604	65.7543	54.694	59.0256	60.2708	45.7168	36.0104	41.147	57.2066	54.1935	51.6785	43.7622	37.9543	37.0835	86.0348	79.7107	39.2172	86.0348
1391677	ILMN_17025	JAG2	Homo sapiens jagged 2 (JAG2), transcript variant 1, mRNA.	NM_002226.3	0.5286	0.65291	1.22836	0.0318221	JAG2	0007605;0030334;0007283;0007219;0030154;0001709;0007267;0030217;0007049;0030326;0045061;0009912;0042127;0008083;0005509;0005112;0016020;0005887	sensory perception of sound ;regulation of cell migration ;spermatogenesis ;Notch signaling pathway ;cell differentiation ;cell fate determination ;cell-cell signaling ;T cell differentiation ;cell cycle ;embryonic limb morphogenesis ;thymic T cell selection ;auditory receptor cell fate commitment ;regulation of cell proliferation ;growth factor activity ;calcium ion binding ;Notch binding ;membr…	JAG2	248.345	231.675	236.857	313.637	200.326	246.576	303.724	238.849	201.339	359.109	266.21	310.295	338.442	316.127	336.227	438.408	293.436	353.449	217.067	378.951	438.408
1393518	ILMN_14220	LOC51255	Homo sapiens hypothetical protein LOC51255 (LOC51255), mRNA.	NM_016494.3	2.9994	2.60872	-1.15613	0.0318791	LOC51255	0016567;0004842;0046872;0008270;000151	protein ubiquitination ;ubiquitin-protein ligase activity ;metal ion binding ;zinc ion binding ;ubiquitin ligase complex	LOC51255	1708.96	1716.27	1733.38	1475.57	1461.87	1772.94	1318.27	1584.82	1313.84	1235.76	1591.18	1455.41	1239.23	1375.34	1769.41	1495.02	1279.47	1357.71	2058.36	1203.96	2058.36
1386210	ILMN_24458	CST7	Homo sapiens cystatin F (leukocystatin) (CST7), mRNA.	NM_003650.2	0.13002	0.09808	-1.33298	0.0318819	CST7	0006955;0004869	immune response ;cysteine protease inhibitor activity	CST7	51.1745	51.6491	58.154	51.5769	64.1923	52.7355	45.0193	70.2555	43.0706	29.4377	49.251	48.6896	54.443	51.7382	34.5553	46.4403	41.8194	84.8238	125.031	81.8675	125.031
1396507	ILMN_1120	KAT3	Homo sapiens kynurenine aminotransferase III (KAT3), transcript variant 1, mRNA.	NM_001008661.1	0.58646	0.42757	-1.3792	0.0319212	KAT3	0009058;000166;0008483;0003676;0016847;0016769	biosynthesis ;nucleotide binding ;transaminase activity ;nucleic acid binding ;1-aminocyclopropane-1-carboxylate synthase activity ;transferase activity transferring nitrogenous groups	KAT3	357.47	488.381	341.423	361.625	229.998	250.043	305.057	192.63	229.27	129.712	310.02	227.948	194.376	191.689	180.09	196.712	293.85	214.346	191.119	140.943	488.381
1378247	ILMN_8098	HCST	Homo sapiens hematopoietic cell signal transducer (HCST), transcript variant 1, mRNA.	NM_014266.3	1.03378	0.56154	-1.85119	0.0320725	HCST	16021	integral to membrane	HCST	379.252	254.444	453.833	364.654	1137.14	934.941	308.697	219.811	150.549	428.532	212.825	316.374	368.98	453.995	338.302	117.71	235.091	777.522	438.848	165.155	1137.14
1388907	ILMN_20813	KSR1	Homo sapiens kinase suppressor of ras 1 (KSR1), mRNA.	NM_014238.1	0.05987	0.0791	1.31393	0.0320929	KSR1	0007242;0006468;0007265;0046872;0004674;0008270;0019992;0005524;0004713;0016020;0005622	intracellular signaling cascade ;protein amino acid phosphorylation ;Ras protein signal transduction ;metal ion binding ;protein serine/threonine kinase activity ;zinc ion binding ;diacylglycerol binding ;ATP binding ;protein-tyrosine kinase activity ;membrane ;intracellular	KSR1	28.3646	35.1225	36.7237	25.531	37.3404	30.2536	24.9134	37.0682	36.185	38.3101	26.7788	36.3312	31.9372	34.916	32.4422	34.6956	59.3099	28.2959	34.6326	64.2232	64.2232
1396189	ILMN_11645	CREG1	Homo sapiens cellular repressor of E1A-stimulated genes 1 (CREG1), mRNA.	NM_003851.2	1.62865	1.2408	-1.31985	0.0321629	CREG1	0008283;0001558;0006357;0007275;0003714;0003702	cell proliferation ;regulation of cell growth ;regulation of transcription from RNA polymerase II promoter ;development ;transcription corepressor activity ;RNA polymerase II transcription factor activity	CREG1	787.453	741.677	902.786	991.65	1148.56	1014.13	706.384	861.272	791.987	518.15	749.802	611.662	579.239	733.422	740.92	460.333	684.722	261.506	1067.73	555.877	1148.56
1395043	ILMN_13303	WDR8	Homo sapiens WD repeat domain 8 (WDR8), mRNA.	NM_017818.2	0.77865	0.89094	1.1379	0.0322736	WDR8	0004;0005554;0008372	biological process unknown ;molecular function unknown ;cellular component unknown	WDR8	372.565	373.127	394.478	374.082	487.328	489.842	474.314	306.366	438.768	495.084	496.578	480.048	397.277	430.331	392.7	424.428	507.77	364.399	294.266	445.28	507.77
1389357	ILMN_20125	ZNF350	Homo sapiens zinc finger protein 350 (ZNF350), mRNA.	NM_021632.3	0.35751	0.42121	1.17169	0.0322746	ZNF350	0006355;0006350;0016481;0046872;0008270;0016564;0005515;0003677;0017053;0005634	regulation of transcription DNA-dependent ;transcription ;negative regulation of transcription ;metal ion binding ;zinc ion binding ;transcriptional repressor activity ;protein binding ;DNA binding ;transcriptional repressor complex ;nucleus	ZNF350	194.36	158.546	129.922	173.042	193.354	167.17	175.805	175.515	205.945	260.683	185.451	200.98	223.395	214.437	154.01	195.93	243.738	160.7	208.371	160.269	260.683
1388408	ILMN_21416	MYL5	Homo sapiens myosin, light polypeptide 5, regulatory (MYL5), mRNA.	NM_002477.1	0.64728	0.44509	-1.46232	0.032298	MYL5	0006937;0007517;0005509;0008307;0003774;0005859;00016459	regulation of muscle contraction ;muscle development ;calcium ion binding ;structural constituent of muscle ;motor activity ;muscle myosin ;myosin	MYL5	198.379	273.468	410.325	430.257	276.231	149.547	493.395	233.047	177.183	137.567	295.654	244.549	78.9578	144.302	358.553	339.575	203.054	325.242	427.803	206.363	493.395
1380519	ILMN_5011	ZBTB4	Homo sapiens zinc finger and BTB domain containing 4 (ZBTB4), mRNA.	NM_020899.2	1.9413	2.2457	1.15042	0.0323299	ZBTB4	16020	membrane	ZBTB4	1086.11	1385.42	1006.27	1099.38	978.351	984.351	1312.12	890.807	1194.11	1332.31	1204.93	1034.83	1301.33	1224.71	1300.13	1276.44	1269.6	736.967	819.477	836.349	1385.42
1379510	ILMN_6305	ZFP106	Homo sapiens zinc finger protein 106 homolog (mouse) (ZFP106), mRNA.	NM_022473.1	2.286	2.79203	1.21463	0.0323546	ZFP106	0006118;0046872;0003676;0008270;0005634	electron transport ;metal ion binding ;nucleic acid binding ;zinc ion binding ;nucleus	ZFP106	1383.61	1772.57	1421.26	1485.36	1271.19	1283.13	1341.5	902.818	1542.22	1456.41	1571.69	1303.8	1856.48	1587.61	1446.49	1072.27	1805.64	816.124	666.278	1273.52	1856.48
1378763	ILMN_7501	EPIM	Homo sapiens epimorphin (EPIM), transcript variant 1, mRNA.	NM_001980.2	0.85259	1.01019	1.17832	0.0324892	EPIM	0006886;0007165;0007398;0009887;0008565;0016020;0005792;0005625;0016021	intracellular protein transport ;signal transduction ;ectoderm development ;organ morphogenesis ;protein transporter activity ;membrane ;microsome ;soluble fraction ;integral to membrane	EPIM	541.78	277.223	380.374	457.689	570.765	519.421	475.499	403.419	615.069	476.675	413.139	576.834	533.774	501.656	473.284	466.566	541.112	376.165	316.11	552.688	615.069
1391788	ILMN_16733	PSTPIP2	Homo sapiens proline-serine-threonine phosphatase interacting protein 2 (PSTPIP2), mRNA.	NM_024430.2	0.09297	0.04449	-2.1015	0.0325466	PSTPIP2	0019882;0030101;0030106;0042612;0016020;0005783	antigen presentation ;natural killer cell activation ;MHC class I receptor activity ;MHC class I protein complex ;membrane ;endoplasmic reticulum	PSTPIP2	43.5394	9.83159	38.0606	11.96	90.3391	84.1342	17.6581	39.334	13.1329	33.1202	15.295	42.4441	26.3228	20.9184	12.0569	27.0157	6.54513	76.0051	74.0157	27.7206	90.3391
1389221	ILMN_20369	MFAP4	Homo sapiens microfibrillar-associated protein 4 (MFAP4), mRNA.	NM_002404.1	0.29357	0.2006	-1.47161	0.0326276	MFAP4	0007155;0005509;0005515;0005578;0001527	cell adhesion ;calcium ion binding ;protein binding ;extracellular matrix (sensu Metazoa) ;microfibril	MFAP4	125.814	113.273	100.086	266.268	178.085	69.0027	183.514	89.3111	79.2052	135.557	109.166	125.118	69.5885	71.397	90.2127	75.3251	87.5474	142.25	167.284	112.683	266.268
1377893	ILMN_8486	CMTM7	Homo sapiens CKLF-like MARVEL transmembrane domain containing 7 (CMTM7), transcript variant 1, mRNA.	NM_138410.2	0.35204	0.15984	-2.21464	0.0326636	CMTM7	0007600;0006935;0005125;0005615;0016020;0016021	sensory perception ;chemotaxis ;cytokine activity ;extracellular space ;membrane ;integral to membrane	CMTM7	71.0208	60.9302	98.3521	110.623	244.143	261.371	73.2405	83.2741	41.8491	107.487	60.0079	73.6322	108.94	111.453	74.5041	33.2146	68.2767	381.325	325.35	83.5015	381.325
1396449	ILMN_11333	FRMPD1	Homo sapiens FERM and PDZ domain containing 1 (FRMPD1), mRNA.	NM_014907.1	0.13682	0.18177	1.32125	0.0326861	FRMPD1	0005515;0005856	protein binding ;cytoskeleton	FRMPD1	45.3517	106.094	79.3225	64.9094	55.0622	54.8225	84.1024	74.3251	109.165	84.1401	91.9787	85.7674	87.3828	98.6537	82.0296	90.92	54.953	62.6986	54.884	81.5283	109.165
1392860	ILMN_15329	OTOP3	Homo sapiens otopetrin 3 (OTOP3), mRNA.	NM_178233.1	0.07433	0.05048	-1.48046	0.0327909	OTOP3	0006810;0005215;0016020	transport ;transporter activity ;membrane	OTOP3	37.8354	20.8763	31.4192	25.6878	27.5676	29.0628	19.2714	58.6915	14.5085	20.844	23.2643	26.1359	23.3652	23.7535	32.6738	17.3137	34.4548	69.5604	80.2832	39.4395	80.2832
1377574	ILMN_8938	MAD2L2	Homo sapiens MAD2 mitotic arrest deficient-like 2 (yeast) (MAD2L2), mRNA.	NM_006341.2	1.64033	1.19603	-1.37908	0.0328678	MAD2L2	0007094;0051301;0007067;0007049;0005515	mitotic spindle checkpoint ;cell division ;mitosis ;cell cycle ;protein binding	MAD2L2	837.867	651.783	545.164	682.762	764.803	981.554	606.921	1039.88	573.827	559.53	650.795	705.626	493.156	637.508	620.581	632.735	507.094	874.313	1448.23	778.181	1448.23
1391454	ILMN_17149	PTPRG	Homo sapiens protein tyrosine phosphatase, receptor type, G (PTPRG), mRNA.	NM_002841.2	0.42834	0.32794	-1.31341	0.0329409	PTPRG	0007169;0006730;0006470;0016787;0005001;0008270;0004089;0005887	transmembrane receptor protein tyrosine kinase signaling pathway ;one-carbon compound metabolism ;protein amino acid dephosphorylation ;hydrolase activity ;transmembrane receptor protein tyrosine phosphatase activity ;zinc ion binding ;carbonate dehydratase activity ;integral to plasma membrane	PTPRG	238.924	140.592	138.244	223.187	167.095	131.428	244.615	199.581	180.94	171.261	139.999	184.544	118.583	116.192	174.711	163.324	147.765	285.424	308.578	170.106	308.578
1380304	ILMN_5379	LOC112869	Homo sapiens hypothetical protein BC011981 (LOC112869), mRNA.	NM_138414.1	0.08208	0.10564	1.28006	0.0329635	LOC112869	0006810;0007155;0006915;0008203;0005515;0004872;0005215;0005624;0016021;0005886	transport ;cell adhesion ;apoptosis ;cholesterol metabolism ;protein binding ;receptor activity ;transporter activity ;membrane fraction ;integral to membrane ;plasma membrane	LOC112869	39.4707	48.5378	37.5255	32.5365	36.1121	56.1443	38.1777	43.6357	31.737	55.6141	45.4502	47.7822	66.1473	33.3078	59.7945	60.1956	50.7267	57.9759	37.8394	60.9488	66.1473
1381773	ILMN_3343	MGC24381	Homo sapiens hypothetical protein MGC24381 (MGC24381), mRNA.	NM_001001410.2	0.73216	0.59178	-1.24407	0.0330876	MGC24381	0030001;0046872	metal ion transport ;metal ion binding	MGC24381	282.651	459.609	563.078	330.195	259.004	344.167	353.836	302.138	304.06	325.5	342.133	231.639	293.262	241.508	249.583	328.358	235.066	379.095	381.29	364.531	563.078
1382233	ILMN_29994	NUTF2	Homo sapiens nuclear transport factor 2 (NUTF2), mRNA.	NM_005796.1	0.51677	0.61583	1.1851	0.0330934	NUTF2	0006606;0015031;0008565;0005634	protein-nucleus import ;protein transport ;protein transporter activity ;nucleus	NUTF2	271.029	224.087	191.259	194.722	243.205	326.798	322.205	245.975	251.064	354.271	311.282	296.551	296.812	301.643	394.649	302.305	318.507	276.71	242.557	224.529	394.649
1382758	ILMN_29149	FLJ12571	Homo sapiens hypothetical protein FLJ12571 (FLJ12571), mRNA.	NM_024926.1	0.10429	0.13258	1.26421	0.0331021	FLJ12571	5488	binding	FLJ12571	37.3706	55.2324	42.6651	43.9271	69.5052	58.6874	48.0337	74.3766	58.135	65.6676	62.5669	41.2791	66.0749	66.9706	56.6652	74.8468	75.3697	61.3961	38.6919	69.0071	75.3697
1390431	ILMN_18546	BNIPL	Homo sapiens BCL2/adenovirus E1B 19kD interacting protein like (BNIPL), transcript variant 1, mRNA.	NM_138278.1	0.03357	0.06741	1.99731	0.0331747	BNIPL	0006915;0008285;0040009;0042802;0005829;0005634	apoptosis ;negative regulation of cell proliferation ;regulation of growth rate ;protein self binding ;cytosol ;nucleus	BNIPL	18.0106	10.1141	14.8128	3.05165	14.6567	25.8195	20.5865	30.8928	9.53774	42.3791	15.9279	45.2877	41.1059	17.973	24.4245	33.2071	17.446	9.57606	30.3265	92.5297	92.5297
1395551	ILMN_12497	SAT	Homo sapiens spermidine/spermine N1-acetyltransferase (SAT), mRNA.	NM_002970.1	7.74059	5.59584	-1.39094	0.0332255	SAT	0008415;0004145;0016740	acyltransferase activity ;diamine N-acetyltransferase activity ;transferase activity	SAT	6381.73	2070.13	2685.84	3407.44	6406.85	3847.2	4614.97	4744.8	2555	3451.28	3002.28	4118.85	2523.53	2486.61	3134.62	2253.37	2640.69	5956.65	4394.9	4715.82	6406.85
1379321	ILMN_6709	RHOT1	Homo sapiens ras homolog gene family, member T1 (RHOT1), transcript variant 3, mRNA.	NM_018307.3	3.9073	4.31865	1.09918	0.0332562	RHOT1	0007264;0015031;0005509;0005525	small GTPase mediated signal transduction ;protein transport ;calcium ion binding ;GTP binding	RHOT1	2586.05	2768.99	1939.45	2103.58	2041.41	2270.37	2069.15	2361.08	2345.49	2431.97	2215.56	2042.31	2577.67	2473.84	2254.98	2496	2421.37	1746.18	1573.41	2274.49	2768.99
1382394	ILMN_2977	KCNMB4	Homo sapiens potassium large conductance calcium-activated channel, subfamily M, beta member 4 (KCNMB4), mRNA.	NM_014505.4	2.52055	2.00742	-1.26258	0.0332564	KCNMB4	0001508;0006811;0006813;0005513;0046928;0019228;0007268;0019229;0005515;0005216;0015269;0016020;0008076	regulation of action potential ;ion transport ;potassium ion transport ;detection of calcium ion ;regulation of neurotransmitter secretion ;generation of action potential ;synaptic transmission ;regulation of vasoconstriction ;protein binding ;ion channel activity ;calcium-activated potassium channel activity ;membrane ;voltage-gated potassium channel complex	KCNMB4	1178.98	980.969	1111.7	989.508	1099.33	1626.35	1202.56	1791.99	1199.08	1133.27	1205.59	999.951	993.444	924.174	1156.97	1115.27	999.432	1833.11	1617.73	938.441	1833.11
1393992	ILMN_138759	CSEN	Homo sapiens calsenilin, presenilin binding protein, EF-hand transcription factor (CSEN), mRNA.	NM_013434.3	2.83388	3.55753	1.24843	0.0333003	CSEN	0006811;0007165;0006813;0006350;0006357;0006915;0030955;0003714;0003677;0005509;0005244;005634	ion transport ;signal transduction ;potassium ion transport ;transcription ;regulation of transcription from RNA polymerase II promoter ;apoptosis ;potassium ion binding ;transcription corepressor activity ;DNA binding ;calcium ion binding ;voltage-gated ion channel activity ;nucleus	CSEN	2014.41	1503.08	1458.99	1677.46	1471.65	906.1	1997.33	1426.32	2220.83	1623.92	1561.82	1578.25	1661.29	1657.24	1870.36	2266.21	2065.92	1934.71	988.224	2759.02	2759.02
1381811	ILMN_3174	CLIC4	Homo sapiens chloride intracellular channel 4 (CLIC4), mRNA.	NM_013943.1	0.2526	0.16746	-1.51678	0.033349	CLIC4	0006821;0006811;0005247;0016020	chloride transport ;ion transport ;voltage-gated chloride channel activity ;membrane	CLIC4	135.549	98.9194	140.334	116.434	108.887	85.9884	69.1162	144.578	102.815	89.627	139.035	153.624	55.1982	61.3995	34.2446	52.4486	60.3482	97.2498	220.125	69.6612	220.125
1382468	ILMN_29643	TAZ	Homo sapiens tafazzin (cardiomyopathy, dilated 3A (X-linked); endocardial fibroelastosis 2; Barth syndrome) (TAZ), transcript variant 5, mRNA.	NM_181314.1	0.10279	0.07279	-1.41991	0.0333662	TAZ	0008152;0007517;0007507;0006936;0008415;0016020;0016021	metabolism ;muscle development ;heart development ;muscle contraction ;acyltransferase activity ;membrane ;integral to membrane	TAZ	46.0064	33.2377	16.2753	29.0513	47.5294	44.727	69.271	75.5201	31.9187	47.3215	37.2304	29.9347	27.464	29.3203	35.2848	44.5573	29.7624	81.2926	86.2313	52.548	86.2313
1396887	ILMN_10853	ABHD5	Homo sapiens abhydrolase domain containing 5 (ABHD5), mRNA.	NM_016006.3	0.23638	0.1918	-1.23925	0.0334681	ABHD5	0006508;0006725;0004177;0016787	proteolysis and peptidolysis ;aromatic compound metabolism ;aminopeptidase activity ;hydrolase activity	ABHD5	98.7126	82.8186	93.412	111.032	172.906	109.628	90.2348	132.841	86.8894	113.559	96.0215	119.41	86.2616	95.1418	87.3475	55.699	76.2765	111.087	145.151	99.0415	172.906
1386635	ILMN_23730	SCRN1	Homo sapiens secernin 1 (SCRN1), mRNA.	NM_014766.2	8.23018	8.91801	1.0776	0.0334691	SCRN1	0006508;0006887;0016805;0031965;0005634	proteolysis and peptidolysis ;exocytosis ;dipeptidase activity ;nuclear membrane ;nucleus	SCRN1	5125.44	5534.69	4522.53	4294.83	4535.59	4583.14	5370.73	4431.8	4633.45	5479.03	4437.68	4980.82	5288.86	4823.6	5498.66	5165.46	5251.77	5132.18	4483.46	5247.62	5534.69
1387608	ILMN_2247	IL8	Homo sapiens interleukin 8 (IL8), mRNA.	NM_000584.2	0.09788	0.02132	-4.61587	0.033471	IL8	0007186;0030593;0007600;0050930;0008285;0007242;0045091;0006935;0007267;0007050;0042119;0019722;0001525;0030155;0006928;0008009;0005515;0005153;0005615	G-protein coupled receptor protein signaling pathway ;neutrophil chemotaxis ;sensory perception ;induction of positive chemotaxis ;negative regulation of cell proliferation ;intracellular signaling cascade ;regulation of retroviral genome replication ;chemotaxis ;cell-cell signaling ;cell cycle arrest ;neutrophil activation ;calcium-mediated signaling ;angiogenesis ;regulation of cell adhesion ;c…	IL8	-1.50748	25.737	70.4304	32.9541	172.746	20.9781	15.9189	51.6079	4.50101	-7.68081	16.7836	13.4948	8.44318	14.4823	7.43063	9.21897	3.24218	46.0087	80.606	19.6838	172.746
1395687	ILMN_12469	KIAA1967	Homo sapiens KIAA1967 (KIAA1967), transcript variant 1, mRNA.	NM_021174.4	0.83837	1.02406	1.21476	0.0335025	KIAA1967	0005509;0005515	calcium ion binding ;protein binding	KIAA1967	539.405	526.802	459.801	393.822	372.918	444.229	487.655	385.76	495.633	430.648	557.047	453.171	682.439	479.773	573.321	671.851	563.944	367.514	278.443	344.63	682.439
1392367	ILMN_15989	CACNA2D2	Homo sapiens calcium channel, voltage-dependent, alpha 2/delta subunit 2 (CACNA2D2), transcript variant 1, mRNA.	NM_001005505.1	0.47201	0.56357	1.1874	0.033577	CACNA2D2	16020	membrane	CACNA2D2	208.538	207.591	204.733	232.225	227.582	228.525	274.02	286.297	238.743	302.148	274.06	187.158	325.505	278.351	259.192	308.553	272.033	278.234	161.309	320.73	325.505
1387113	ILMN_23066	MGC33302	Homo sapiens hypothetical protein MGC33302 (MGC33302), mRNA.	NM_152778.1	0.15698	0.10959	-1.44044	0.0336307	MGC33302	0006810;0005215;0016020;0016021	transport ;transporter activity ;membrane ;integral to membrane	MGC33302	89.0725	76.9838	97.2231	117.61	66.1041	60.2352	77.3111	54.8533	70.3045	40.9985	86.1453	42.9934	37.9009	60.6513	41.1727	55.8015	55.6425	74.1246	61.7843	44.4462	117.61
1382235	ILMN_29996	RBM4B	Homo sapiens RNA binding motif protein 4B (RBM4B), mRNA.	NM_031492.2	1.34476	1.78744	1.32186	0.0336543	RBM4B	000398;0046872;000166;0008270;0003723;0005634	nuclear mRNA splicing via spliceosome ;metal ion binding ;nucleotide binding ;zinc ion binding ;RNA binding ;nucleus	RBM4B	424.191	593.453	370.932	732.311	947.572	809.264	656.128	1014.42	871.916	1312.82	618.126	1029.12	1245.56	910.538	670.987	735.632	904.166	752.67	618.213	1084.2	1312.82
1388835	ILMN_20705	LILRB4	Homo sapiens leukocyte immunoglobulin-like receptor, subfamily B (with TM and ITIM domains), member 4 (LILRB4), mRNA.	NM_006847.2	0.08429	0.04535	-1.86888	0.0337694	LILRB4	0006955;0007165;0003823;0004872;0016021;0005886	immune response ;signal transduction ;antigen binding ;receptor activity ;integral to membrane ;plasma membrane	LILRB4	37.3059	19.8046	59.6579	11.0684	36.7416	17.1567	50.8776	29.626	8.86186	49.7363	13.3416	17.5833	27.6903	6.33693	36.4012	25.8718	17.5575	94.4585	90.6697	24.804	94.4585
1393306	ILMN_14614	CYP1B1	Homo sapiens cytochrome P450, family 1, subfamily B, polypeptide 1 (CYP1B1), mRNA.	NM_000104.2	0.94053	0.48852	-1.93594	0.0338437	CYP1B1	0006118;0007601;0001747;0005489;0046872;0020037;0050381;0019825;0004497;0005506;0016020;0005792;005783	electron transport ;visual perception ;eye development (sensu Mammalia) ;electron transporter activity ;metal ion binding ;heme binding ;unspecific monooxygenase activity ;oxygen binding ;monooxygenase activity ;iron ion binding ;membrane ;microsome ;endoplasmic reticulum	CYP1B1	708.59	342.8	381.609	778.785	1041.04	423.291	480.554	95.8351	335.097	277.184	270.228	210.767	208.561	312.468	236.214	137.471	221.661	61.5501	568.212	186.67	1041.04
1377216	ILMN_9560	KCNJ9	Homo sapiens potassium inwardly-rectifying channel, subfamily J, member 9 (KCNJ9), mRNA.	NM_004983.2	0.07784	0.09728	1.24293	0.0338875	KCNJ9	0006811;0006813;0015467;0030955;0005267;0005244;0005624;0016021;00016020	ion transport ;potassium ion transport ;G-protein activated inward rectifier potassium channel activity ;potassium ion binding ;potassium channel activity ;voltage-gated ion channel activity ;membrane fraction ;integral to membrane ;membrane	KCNJ9	45.0993	45.2081	44.7474	41.8922	31.1038	29.2618	36.437	25.5343	48.7268	61.6854	43.2819	40.8887	53.6971	54.675	41.257	47.3428	32.1079	60.6367	50.4739	53.4909	61.6854
1396838	ILMN_10775	FAM105A	Homo sapiens family with sequence similarity 105, member A (FAM105A), mRNA.	NM_019018.1	0.14893	0.12431	-1.2047	0.0339394	FAM105A	0006412;0007566;0003735;0008201;0003723;0005842;0005622;0005840	protein biosynthesis ;embryo implantation ;structural constituent of ribosome ;heparin binding ;RNA binding ;cytosolic large ribosomal subunit (sensu Eukaryota) ;intracellular ;ribosome	FAM105A	43.8937	72.485	88.8323	84.632	81.2992	69.7284	54.2868	71.0127	54.2101	70.5333	47.9569	48.072	61.8495	64.8618	58.0608	74.4479	45.6987	86.3612	92.1511	70.8596	92.1511
1386114	ILMN_24538	PLAUR	Homo sapiens plasminogen activator, urokinase receptor (PLAUR), transcript variant 2, mRNA.	NM_001005376.1	0.08433	0.04637	-1.8286	0.0339454	PLAUR	0006935;0007596;0030162;0007166;0006928;0005515;0030377;0016021;0009986;0019898;0005886	chemotaxis ;blood coagulation ;regulation of proteolysis ;cell surface receptor linked signal transduction ;cell motility ;protein binding ;U-plasminogen activator receptor activity ;integral to membrane ;cell surface ;extrinsic to membrane ;plasma membrane	PLAUR	32.4529	18.7824	31.1202	14.9815	58.3353	53.2488	19.9093	35.4731	15.9381	35.6617	16.6252	29.6898	25.5519	22.2126	21.1442	17.4615	16.0219	73.8069	106.559	37.5139	106.559
1377236	ILMN_9365	POLN	Homo sapiens polymerase (DNA directed) nu (POLN), mRNA.	NM_181808.1	0.24055	0.33978	1.40476	0.0339801	POLN	0006260;0003887;0003677	DNA replication ;DNA-directed DNA polymerase activity ;DNA binding	POLN	112.309	36.324	83.2749	92.6668	102.963	140.482	187.31	166.165	103.828	216.437	101.085	153.377	178.666	175.21	124.668	172.732	129.482	128.928	123.999	258.514	258.514
1388782	ILMN_20854	HSPC171	Homo sapiens HSPC171 protein (HSPC171), mRNA.	NM_014187.1	0.95161	0.87726	-1.09076	0.0339814	HSPC171	0006334;0007001;0003677;000786;0005634	nucleosome assembly ;chromosome organization and biogenesis (sensu Eukaryota) ;DNA binding ;nucleosome ;nucleus	HSPC171	465.868	489.087	532.489	514.193	456.906	502.87	521.139	425.711	555.132	358.191	520.281	410.7	388.972	460.864	441.987	435.489	447.917	455.598	459.157	429.258	555.132
1381315	ILMN_3871	BNIP3	Homo sapiens BCL2/adenovirus E1B 19kDa interacting protein 3 (BNIP3), nuclear gene encoding mitochondrial protein, mRNA.	NM_004052.2	10.9038	12.3666	1.1279	0.0340297	BNIP3	0006915;0006916;0043065;0005515;0016020;0016021;0005740	apoptosis ;anti-apoptosis ;positive regulation of apoptosis ;protein binding ;membrane ;integral to membrane ;mitochondrial membrane	BNIP3	7881.61	6535.58	6314.9	6502.86	6199.32	6024.42	7050.01	8591.23	6483.46	8033.66	6763.66	7341.77	8366.61	6775.59	7619.89	7308.77	6971.84	5959.9	4276.36	5943.97	8591.23
1382801	ILMN_2921	COL16A1	Homo sapiens collagen, type XVI, alpha 1 (COL16A1), mRNA.	NM_001856.2	0.92108	1.21796	1.31504	0.0340521	COL16A1	0006817;0007565;0007155;0005198;0005578;0005737;0005597	phosphate transport ;pregnancy ;cell adhesion ;structural molecule activity ;extracellular matrix (sensu Metazoa) ;cytoplasm ;collagen type XVI	COL16A1	425.929	256.782	449.349	502.036	653.473	492.596	498.381	352.23	603.937	681.6	454.392	1070.05	488.457	664.254	481.406	696.553	596.853	570.732	450.219	532.779	1070.05
1396705	ILMN_11050	C3orf20	Homo sapiens chromosome 3 open reading frame 20 (C3orf20), mRNA.	NM_032137.3	0.06419	0.045	-1.43442	0.0340636	C3orf20	0006364;000175;0004527;0016787;0005515;0008312;000178;0005737;0005634	rRNA processing ;3'-5'-exoribonuclease activity ;exonuclease activity ;hydrolase activity ;protein binding ;7S RNA binding ;exosome (RNase complex) ;cytoplasm ;nucleus	C3orf20	25.5514	24.1785	51.558	16.404	27.0266	12.8743	31.4746	40.9086	16.7951	22.8676	16.7554	35.5013	17.0356	23.686	22.5229	21.6772	19.2614	58.4995	64.1871	32.0604	64.1871
1382846	ILMN_29056	GNPDA1	Homo sapiens glucosamine-6-phosphate deaminase 1 (GNPDA1), mRNA.	NM_005471.3	2.86622	3.35064	1.16257	0.034128	GNPDA1	0006091;0007338;0006043;0005975;0006044;0004342;0016787	generation of precursor metabolites and energy ;fertilization (sensu Metazoa) ;glucosamine catabolism ;carbohydrate metabolism ;N-acetylglucosamine metabolism ;glucosamine-6-phosphate deaminase activity ;hydrolase activity	GNPDA1	1653.54	1789.44	1281.74	1622.73	1768.92	1865.69	1671.62	1581.23	1636.63	1844.37	1521.32	1490.05	2175.97	1787.29	2022.49	1968.67	2247.61	1279.45	985.284	1407.46	2247.61
1386470	ILMN_23940	GPRC5A	Homo sapiens G protein-coupled receptor, family C, group 5, member A (GPRC5A), mRNA.	NM_003979.3	0.08254	0.05949	-1.39502	0.03422	GPRC5A	0007165;0007186;0008067;0004872;0016020;0005887	signal transduction ;G-protein coupled receptor protein signaling pathway ;metabotropic glutamate GABA-B-like receptor activity ;receptor activity ;membrane ;integral to plasma membrane	GPRC5A	39.9914	16.3341	41.4286	30.5519	38.8385	33.3074	38.9123	42.1142	25.0061	34.3776	43.5675	18.3947	25.1554	24.621	29.9571	30.8986	25.7057	84.7287	75.1942	44.384	84.7287
1381933	ILMN_3107	LARP2	Homo sapiens La ribonucleoprotein domain family, member 2 (LARP2), transcript variant 2, mRNA.	NM_178043.1	0.1986	0.14935	-1.33713	0.0342324	LARP2	0008272;0006810;0005215;0008271;0016020;0016021	sulfate transport ;transport ;transporter activity ;sulfate porter activity ;membrane ;integral to membrane	LARP2	69.0362	101.318	95.0661	69.12	71.5529	89.5266	89.7598	153.409	69.728	62.2532	82.862	64.5086	68.026	69.479	63.5187	89.6588	69.6897	74.7005	148.658	74.4958	153.409
1386816	ILMN_2354	PFN1	Homo sapiens profilin 1 (PFN1), mRNA.	NM_005022.2	1.62725	1.29718	-1.2614	0.034281	PFN1	0007010;0030036;0003785;0015629	cytoskeleton organization and biogenesis ;actin cytoskeleton organization and biogenesis ;actin monomer binding ;actin cytoskeleton	PFN1	605.862	1016.93	1100.3	870.791	933.786	822.193	563.388	627.845	804.326	661.944	753.989	750.291	642.535	798.105	695.892	454.129	536.697	740.158	1160.61	622.358	1160.61
1394396	ILMN_137784	AMFR	Homo sapiens autocrine motility factor receptor (AMFR), transcript variant 2, mRNA.	NM_138958.1	1.40457	2.01897	1.42951	0.0344302	AMFR	0007165;0016567;0030433;0006928;0046872;0005515;0004872;0004842;0008270;0016874;000151;0016021;0030176;005783	signal transduction ;protein ubiquitination ;ER-associated protein catabolism ;cell motility ;metal ion binding ;protein binding ;receptor activity ;ubiquitin-protein ligase activity ;zinc ion binding ;ligase activity ;ubiquitin ligase complex ;integral to membrane ;integral to endoplasmic reticulum membrane ;endoplasmic reticulum	AMFR	928.184	944.987	546.764	882.009	853.892	991.245	905.632	375.94	653.455	1161.03	1455.13	961.087	1414.51	1346.76	1413.81	351.63	1314.07	476.809	462.444	638.355	1455.13
1388831	ILMN_20700	DUSP1	Homo sapiens dual specificity phosphatase 1 (DUSP1), mRNA.	NM_004417.2	5.39115	2.84992	-1.90218	0.0344792	DUSP1	0006470;0007049;0006979;0016787;0004726;0017017	protein amino acid dephosphorylation ;cell cycle ;response to oxidative stress ;hydrolase activity ;non-membrane spanning protein tyrosine phosphatase activity ;MAP kinase phosphatase activity	DUSP1	1160.64	2375.48	1653.83	4148.44	3244.43	1500.66	2594.69	1666.01	1259.69	1729.54	1761.65	1858.73	1497.2	1243.42	767.961	820.984	1887.18	7381.28	4625.45	2382.75	7381.28
1387558	ILMN_22613	EDNRB	Homo sapiens endothelin receptor type B (EDNRB), transcript variant 1, mRNA.	NM_000115.1	0.0437	0.06783	1.54347	0.0344856	EDNRB	0007605;0007200;0007399;0007194;0004872;0004962;0001584;0005887;0005886	sensory perception of sound ;G-protein signaling coupled to IP3 second messenger (phospholipase C activating) ;neurogenesis ;negative regulation of adenylate cyclase activity ;receptor activity ;endothelin receptor activity ;rhodopsin-like receptor activity ;integral to plasma membrane ;plasma membrane	EDNRB	31.8607	13.1421	19.9631	20.9619	31.4375	10.9622	32.2853	31.1336	36.5762	40.587	27.115	56.5078	15.7309	31.8467	42.6795	20.5883	26.4139	23.3825	9.85279	37.6887	56.5078
1381605	ILMN_3570	TBC1D5	Homo sapiens TBC1 domain family, member 5 (TBC1D5), mRNA.	NM_014744.1	0.10349	0.12748	1.22502	0.0344973	TBC1D5	5096	GTPase activator activity	TBC1D5	46.2247	47.9864	70.1552	42.1446	53.7039	44.9377	52.9483	53.5013	61.0774	74.1833	66.9742	66.2503	49.9317	79.4552	50.7061	45.2625	67.0131	58.8066	64.0849	56.6636	79.4552
1378901	ILMN_7240	HSPC047	Homo sapiens HSPC047 protein (HSPC047), mRNA.	NM_014147.1	0.18787	0.23882	1.26415	0.0345349	HSPC047	0001501;0007155;0005515;0008201;0005578	skeletal development ;cell adhesion ;protein binding ;heparin binding ;extracellular matrix (sensu Metazoa)	HSPC047	94.1904	60.8576	109.898	70.3303	110.864	65.2449	127.597	83.0477	112.288	109.568	76.5595	113.676	88.2168	103.275	121.71	143.718	146.217	122.967	76.6259	118.423	146.217
1379931	ILMN_5756	PLEK	Homo sapiens pleckstrin (PLEK), mRNA.	NM_002664.1	0.30393	0.17755	-1.72127	0.0346466	PLEK	0007242;0005509	intracellular signaling cascade ;calcium ion binding	PLEK	107.144	83.5191	101.888	98.8053	295.625	214.726	65.5112	71.9174	57.4084	95.0505	77.2094	57.9052	112.319	124.914	95.9784	59.379	63.9305	243.014	202.12	100.667	295.625
1390615	ILMN_18364	LOC401431	Homo sapiens hypothetical gene LOC401431 (LOC401431), mRNA.	NM_001008745.1	0.27413	0.33354	1.21001	0.0346582	LOC401431	0007420;0006355;0046872;0008270;0003700;0005634	brain development ;regulation of transcription DNA-dependent ;metal ion binding ;zinc ion binding ;transcription factor activity ;nucleus	LOC401431	100.173	158.931	157.437	113.34	126.587	119.316	147.925	143.507	158.119	119.059	158.521	148.265	108.313	145.34	190.77	198.537	170.134	115.262	148.73	200.453	200.453
1389491	ILMN_19876	KIR2DS4	Homo sapiens killer cell immunoglobulin-like receptor, two domains, short cytoplasmic tail, 4 (KIR2DS4), transcript variant 1, mRNA.	NM_012314.2	0.05523	0.07119	1.28185	0.034672	KIR2DS4	0030102;0006952;0030110;0004872;0016021;0005887	negative regulation of natural killer cell activity ;defense response ;HLA-C specific inhibitory MHC class I receptor activity ;receptor activity ;integral to membrane ;integral to plasma membrane	KIR2DS4	26.6442	24.6429	21.9	29.1732	23.3302	26.5157	15.7117	30.0575	35.8216	32.1364	36.8076	31.6678	48.8982	23.7077	37.1593	42.4728	28.608	47.193	59.4985	36.6459	59.4985
1394702	ILMN_136951	KCNQ2	Homo sapiens potassium voltage-gated channel, KQT-like subfamily, member 2 (KCNQ2), transcript variant 3, mRNA.	NM_004518.2	9.16672	10.9747	1.19064	0.0346865	KCNQ2	0006813;0007399;0006812;0007268;0030955;0005249;0005624;0016021;0016020;0008076	potassium ion transport ;neurogenesis ;cation transport ;synaptic transmission ;potassium ion binding ;voltage-gated potassium channel activity ;membrane fraction ;integral to membrane ;membrane ;voltage-gated potassium channel complex	KCNQ2	7333.74	6456.94	5429.89	5580.84	4483.02	6093.97	6319.22	5706.45	5207.38	7700.96	4731.41	5449.01	6978.37	6719.94	6849.4	7208.32	5938.12	3787.47	3100.51	6626.86	7700.96
1390727	ILMN_18297	CD55	Homo sapiens CD55 antigen, decay accelerating factor for complement (Cromer blood group) (CD55), mRNA.	NM_000574.2	1.18567	0.88393	-1.34879	0.0346945	CD55	0045087;0006958;0016020;0005625;0005887	innate immune response ;complement activation classical pathway ;membrane ;soluble fraction ;integral to plasma membrane	CD55	563.414	498.193	579.003	642.784	749.258	916.763	362	441.895	625.085	289.7	605.487	695.524	409.177	539.073	311.67	313.552	410.917	490.75	810.31	293.25	916.763
1388981	ILMN_20690	HIPK3	Homo sapiens homeodomain interacting protein kinase 3 (HIPK3), mRNA.	NM_005734.2	0.07636	0.05489	-1.39883	0.0347308	HIPK3	0006355;0006350;0006915;0006468;000166;0016740;0004674;0005524;0005634	regulation of transcription DNA-dependent ;transcription ;apoptosis ;protein amino acid phosphorylation ;nucleotide binding ;transferase activity ;protein serine/threonine kinase activity ;ATP binding ;nucleus	HIPK3	28.152	23.3226	35.3807	16.1659	46.5486	38.2637	43.136	44.2609	26.4361	35.8995	30.0173	31.282	14.2617	27.0794	32.6301	30.2279	19.4495	51.9472	82.792	26.8539	82.792
1386704	ILMN_2361	NUDT1	Homo sapiens nudix (nucleoside diphosphate linked moiety X)-type motif 1 (NUDT1), transcript variant 4B, mRNA.	NM_198954.1	0.9818	0.81437	-1.21228	0.0347859	NUDT1	0006979;0006281;0008413;0016787;0003924	response to oxidative stress ;DNA repair ;8-oxo-78-dihydroguanine triphosphatase activity ;hydrolase activity ;GTPase activity	NUDT1	337.476	524.432	392.425	400.899	510.614	609.178	435.663	596.488	427.265	376.557	424.907	414.57	468.749	374.303	368.153	339.291	394.07	484.493	665.174	503.636	665.174
1396847	ILMN_10802	FOXH1	Homo sapiens forkhead box H1 (FOXH1), mRNA.	NM_003923.1	0.06933	0.04831	-1.44322	0.0349012	FOXH1	0006355;0007165;0006350;0003713;0003700;0005634	regulation of transcription DNA-dependent ;signal transduction ;transcription ;transcription coactivator activity ;transcription factor activity ;nucleus	FOXH1	41.3771	24.2891	18.5834	22.8963	34.6197	43.2111	25.8813	32.5779	15.3565	39.0598	18.2539	21.9946	21.6933	18.8021	17.4326	19.8485	24.583	51.458	76.9374	52.8654	76.9374
1389251	ILMN_20197	RAB40A	Homo sapiens RAB40A, member RAS oncogene family (RAB40A), mRNA.	NM_080879.2	0.08667	0.11462	1.3152	0.0349275	RAB40A	0007264;0015031;000166;0005525	small GTPase mediated signal transduction ;protein transport ;nucleotide binding ;GTP binding	RAB40A	50.877	33.2012	50.4336	38.0164	65.3065	38.0927	46.1614	53.2657	49.0979	59.5284	49.9234	60.7963	44.1103	69.8258	33.5082	59.7288	68.8023	20.9558	47.6573	63.5022	69.8258
1392285	ILMN_16098	THBS2	Homo sapiens thrombospondin 2 (THBS2), mRNA.	NM_003247.2	1.92482	1.36785	-1.41499	0.0350342	THBS2	0007155;0005509;0005198;0005515;0008201;0005578;0005576	cell adhesion ;calcium ion binding ;structural molecule activity ;protein binding ;heparin binding ;extracellular matrix (sensu Metazoa) ;extracellular region	THBS2	956.116	901.174	1010.3	944.541	1067.16	838.658	764.832	792.196	718.166	632.997	1172.39	1093.16	655.231	674.982	454.572	547.597	450.698	1994.77	879.232	689.14	1994.77
1379930	ILMN_5752	C10orf57	Homo sapiens chromosome 10 open reading frame 57 (C10orf57), mRNA.	NM_025125.2	0.65209	0.75974	1.15866	0.0351328	C10orf57	16021	integral to membrane	C10orf57	268.049	331.799	266.99	381.271	396.309	309.595	330.257	304.778	443.653	292.498	316.717	418.412	340	469.961	435.734	379.506	318.776	366.328	282.806	398.018	469.961
1397350	ILMN_10199	C1orf69	Homo sapiens chromosome 1 open reading frame 69 (C1orf69), mRNA.	NM_001010867.1	0.07917	0.10947	1.37517	0.035249	C1orf69	0006546;0004047;0005737	glycine catabolism ;aminomethyltransferase activity ;cytoplasm	C1orf69	29.707	32.4825	63.6069	59.0351	34.8443	42.1464	49.8855	6.7035	51.3982	50.0986	43.7279	48.6022	66.001	54.7478	52.9572	41.0908	68.8416	36.9822	52.8304	55.2261	68.8416
1382585	ILMN_29348	SIRT5	Homo sapiens sirtuin (silent mating type information regulation 2 homolog) 5 (S. cerevisiae) (SIRT5), transcript variant 2, mRNA.	NM_031244.1	0.07542	0.0998	1.31594	0.0352918	SIRT5	0006355;0006471;0006342;0003950;0046872;0016787;0003677;0005677	regulation of transcription DNA-dependent ;protein amino acid ADP-ribosylation ;chromatin silencing ;NAD+ ADP-ribosyltransferase activity ;metal ion binding ;hydrolase activity ;DNA binding ;chromatin silencing complex	SIRT5	28.9478	27.318	55.3061	45.3637	40.88	32.5992	40.5239	39.2518	43.6971	38.2729	58.0545	37.1999	40.0186	53.1981	42.5481	33.9907	64.603	43.343	48.2858	79.1242	79.1242
1389464	ILMN_19841	TBC1D22B	Homo sapiens TBC1 domain family, member 22B (TBC1D22B), mRNA.	NM_017772.2	1.01199	1.18853	1.16797	0.0353821	TBC1D22B	5096	GTPase activator activity	TBC1D22B	610.147	464.098	392.536	552.101	535.739	529.279	570.156	675.726	583.198	692.345	499.019	540.062	615.46	629.03	570.95	752.258	642.788	460.389	370.172	605.145	752.258
1383189	ILMN_28617	CRYBB1	Homo sapiens crystallin, beta B1 (CRYBB1), mRNA.	NM_001887.3	0.06929	0.04705	-1.48097	0.0354808	CRYBB1	0007601;0005212	visual perception ;structural constituent of eye lens	CRYBB1	25.6197	42.5127	44.1351	16.9838	48.3203	30.4085	22.8598	27.4932	16.7276	21.2895	38.979	11.8832	32.5724	32.2302	19.4754	7.91774	22.0747	55.5261	58.1416	30.547	58.1416
1387949	ILMN_22086	APOL1	Homo sapiens apolipoprotein L, 1 (APOL1), transcript variant 3, mRNA.	NM_145344.1	0.07739	0.06097	-1.27634	0.0355264	APOL1	0006629;0042157;0006869;0008202;0008203;0008289;0005319;0005615	lipid metabolism ;lipoprotein metabolism ;lipid transport ;steroid metabolism ;cholesterol metabolism ;lipid binding ;lipid transporter activity ;extracellular space	APOL1	38.3741	31.6512	40.3383	37.6393	33.8721	50.5667	41.8383	42.5639	22.654	38.8463	15.2392	30.2547	40.9894	32.7504	30.2831	14.6177	27.666	45.6081	46.8514	55.9472	55.9472
1383736	ILMN_27806	NIN	Homo sapiens ninein (GSK3B interacting protein) (NIN), transcript variant 1, mRNA.	NM_182944.1	0.0751	0.09547	1.26427	0.0356884	NIN	0006457;000166;0005509;0005524;0005525;0051082;0005874	protein folding ;nucleotide binding ;calcium ion binding ;ATP binding ;GTP binding ;unfolded protein binding ;microtubule	NIN	41.6566	22.726	44.7288	33.2294	38.1911	47.8013	38.2048	44.5025	37.269	57.4432	31.5781	46.054	65.0379	48.1735	37.4461	33.5602	45.1736	34.7904	51.6614	67.5011	67.5011
1387548	ILMN_2260	MGC7036	Homo sapiens hypothetical protein MGC7036 (MGC7036), mRNA.	NM_145058.1	0.37683	0.32041	-1.18259	0.0356901	MGC7036	42802	protein self binding	MGC7036	206.957	149.087	160.254	179.659	167.802	173.039	173.349	146.896	133.452	154.175	123.262	184.678	134.309	127.059	189.639	160.519	170.588	256.006	215.939	156.375	256.006
1383850	ILMN_27517	ACOX2	Homo sapiens acyl-Coenzyme A oxidase 2, branched chain (ACOX2), mRNA.	NM_003500.2	0.27828	0.41254	1.4743	0.0357223	ACOX2	0006631;0006635;0008206;0006629;0006118;0003995;0003997;0016491;0005777	fatty acid metabolism ;fatty acid beta-oxidation ;bile acid metabolism ;lipid metabolism ;electron transport ;acyl-CoA dehydrogenase activity ;acyl-CoA oxidase activity ;oxidoreductase activity ;peroxisome	ACOX2	102.848	102.381	56.7715	110.651	200.554	169.03	187.037	126.28	135.104	283.925	143.976	287.923	132.499	169.988	194.739	175.996	124.306	194.07	104.103	338.164	338.164
1379672	ILMN_6076	DET1	Homo sapiens de-etiolated homolog 1 (Arabidopsis) (DET1), mRNA.	NM_017996.2	0.24869	0.28528	1.1408	0.0357946	DET1	0006512;0005634	ubiquitin cycle ;nucleus	DET1	122.167	110.661	115.713	146.272	110.401	125.045	124.723	111.174	134.385	133.207	139.787	107.067	134.644	153.781	127.457	151.539	158.421	103.137	135.807	122.887	158.421
1385172	ILMN_25849	LIMD2	Homo sapiens LIM domain containing 2 (LIMD2), mRNA.	NM_030576.2	0.06724	0.04266	-1.58509	0.0359717	LIMD2	0046872;0008270	metal ion binding ;zinc ion binding	LIMD2	43.4459	23.8822	19.9049	9.90183	25.0262	24.4245	36.5593	49.3617	16.1719	17.1429	22.4753	31.1062	16.3676	17.8097	17.0246	31.0617	15.0699	46.2869	83.8869	30.8142	83.8869
1393210	ILMN_14704	EIF1AY	Homo sapiens eukaryotic translation initiation factor 1A, Y-linked (EIF1AY), mRNA.	NM_004681.2	1.40758	0.61681	-2.29469	0.0359871	EIF1AY	0006413;0006412;0003723;0005515;0003743	translational initiation ;protein biosynthesis ;RNA binding ;protein binding ;translation initiation factor activity	EIF1AY	892.565	1023.17	787.379	-1.98132	905.381	-2.07307	803.18	937.06	1013.85	483.507	-0.09688	15.0425	-5.83874	644.958	2.82177	412.281	640.134	546.235	1397.74	-12.3384	1397.74
1384705	ILMN_26500	C8orf44	Homo sapiens chromosome 8 open reading frame 44 (C8orf44), mRNA.	NM_019607.1	0.54037	0.71049	1.30757	0.0362372	C8orf44	0003676;0005515	nucleic acid binding ;protein binding	C8orf44	231.125	152.914	339.103	259.615	253.237	310.165	398.716	356.19	291.713	408.67	240.791	358.292	373.433	409.442	345.072	538.159	350.046	198.583	174.491	241.266	538.159
1379644	ILMN_6273	MGLL	Homo sapiens monoglyceride lipase (MGLL), transcript variant 1, mRNA.	NM_007283.5	1.08438	1.29146	1.1844	0.0363597	MGLL	0006954;0006629;0006725;0016787;0004622;0004759;0047372	inflammatory response ;lipid metabolism ;aromatic compound metabolism ;hydrolase activity ;lysophospholipase activity ;serine esterase activity ;acylglycerol lipase activity	MGLL	588.854	593.91	580.136	557.49	469.803	453.347	649.393	409.342	671.492	593.072	578.008	680.842	674.84	731.435	693.928	665.714	663.756	809.728	411.7	735.807	809.728
1381028	ILMN_4379	MYO1F	Homo sapiens myosin IF (MYO1F), mRNA.	NM_012335.2	0.05442	0.02545	-2.15002	0.0364042	MYO1F	0004;0003779;000166;0005516;000146;0005524;0003774;0016461;0016459	biological process unknown ;actin binding ;nucleotide binding ;calmodulin binding ;microfilament motor activity ;ATP binding ;motor activity ;unconventional myosin ;myosin	MYO1F	21.6398	12.6837	17.4605	24.3932	19.8946	32.3944	9.28829	29.864	7.68094	-4.88883	6.78594	14.8979	17.6452	30.4132	6.44803	1.01116	6.9742	88.5772	41.7022	28.5304	88.5772
1392351	ILMN_15970	GAL3ST3	Homo sapiens galactose-3-O-sulfotransferase 3 (GAL3ST3), mRNA.	NM_033036.1	0.3407	0.43827	1.27929	0.0364846	GAL3ST3	0009311;0005996;0030309;0006790;0030166;0009058;0001733;0050698;000287;0030246;0050656;0016740;0016021;005795	oligosaccharide metabolism ;monosaccharide metabolism ;poly-N-acetyllactosamine metabolism ;sulfur metabolism ;proteoglycan biosynthesis ;biosynthesis ;galactosylceramide sulfotransferase activity ;proteoglycan sulfotransferase activity ;magnesium ion binding ;carbohydrate binding ;3'-phosphoadenosine 5'-phosphosulfate binding ;transferase activity ;integral to membrane ;Golgi stack	GAL3ST3	211.808	167.906	104.932	217.48	150.805	140.009	147.763	200.544	215.889	173.732	138.364	164.119	226.769	228.167	172.812	294.452	281.329	192.008	124.755	232.152	294.452
1394532	ILMN_137321	ZFP3	Homo sapiens zinc finger protein 3 homolog (mouse) (ZFP3), mRNA.	NM_153018.1	0.41788	0.52494	1.24928	0.0365512	ZFP3	0046872;0003676;0008270;0005634	metal ion binding ;nucleic acid binding ;zinc ion binding ;nucleus	ZFP3	219.064	215.708	141.993	241.554	294.903	196.173	235.425	238.656	319.09	266.966	261.125	293.983	289.061	249.972	247.438	159.262	257.019	157.436	115.237	232.094	319.09
1392672	ILMN_15522	S100A11	Homo sapiens S100 calcium binding protein A11 (calgizzarin) (S100A11), mRNA.	NM_005620.1	0.3136	0.1735	-1.81753	0.036679	S100A11	0007165;0008285;0008156;0005509;0005737;0005634	signal transduction ;negative regulation of cell proliferation ;negative regulation of DNA replication ;calcium ion binding ;cytoplasm ;nucleus	S100A11	93.429	50.0611	130.143	93.8902	171.298	222.66	69.6066	102.832	56.9417	125.211	82.9439	105.751	89.3774	100.326	64.4046	59.4359	51.3098	257.364	326.26	91.9905	326.26
1389129	ILMN_20454	SSPN	Homo sapiens sarcospan (Kras oncogene-associated gene) (SSPN), mRNA.	NM_005086.3	0.73354	1.05612	1.43182	0.0368137	SSPN	0007155;0006936;0016010;0005856;0005887	cell adhesion ;muscle contraction ;dystrophin-associated glycoprotein complex ;cytoskeleton ;integral to plasma membrane	SSPN	332.079	312.198	196.567	268.368	479.368	215.125	382.032	386.584	407.014	683.439	436.135	898.849	349.923	345.704	566.873	596.651	404.512	652.653	409.467	697.766	898.849
1396196	ILMN_11653	CDH15	Homo sapiens cadherin 15, M-cadherin (myotubule) (CDH15), mRNA.	NM_004933.2	0.07087	0.05276	-1.35068	0.0368233	CDH15	0007156;0007155;0005509;0005515;0016021;0005886	homophilic cell adhesion ;cell adhesion ;calcium ion binding ;protein binding ;integral to membrane ;plasma membrane	CDH15	36.8734	51.9289	42.9083	23.8181	24.8653	32.1112	39.915	38.0834	35.6837	28.5656	19.2729	26.5267	22.3182	31.6212	22.5717	21.2823	28.201	44.0735	39.8941	29.7819	51.9289
1384318	ILMN_26850	CXorf15	Homo sapiens chromosome X open reading frame 15 (CXorf15), mRNA.	NM_018360.1	0.15914	0.19633	1.22684	0.036857	CXorf15	0007165;0030168;0045190;0006916;0006954;0007159;0042100;0005174;0005164;0005615;0016020;0005625;0005887	signal transduction ;platelet activation ;isotype switching ;anti-apoptosis ;inflammatory response ;leukocyte adhesion ;B cell proliferation ;CD40 receptor binding ;tumor necrosis factor receptor binding ;extracellular space ;membrane ;soluble fraction ;integral to plasma membrane	CXorf15	52.5785	79.8003	72.7863	76.5671	68.9189	90.5396	69.1681	104.302	80.7881	80.6168	99.4076	65.3845	101.605	119.747	69.7309	119.368	84.9452	95.9879	76.5227	108.157	119.747
1385150	ILMN_25826	SBK1	Homo sapiens SH3-binding domain kinase 1 (SBK1), mRNA.	NM_001024401.2	1.32728	1.61409	1.20938	0.0368681	SBK1	0006468;0004674;0005524;0004713	protein amino acid phosphorylation ;protein serine/threonine kinase activity ;ATP binding ;protein-tyrosine kinase activity	SBK1	654.907	879.542	673.347	1011.82	633.285	732.365	797.133	495.604	833.306	759.284	777.599	766.319	1151.53	808.202	914.849	843.613	758.958	672.753	353.923	893.042	1151.53
1384162	ILMN_27065	DGKQ	Homo sapiens diacylglycerol kinase, theta 110kDa (DGKQ), mRNA.	NM_001347.2	1.4644	1.70199	1.15584	0.0368924	DGKQ	0007242;0007205;0046872;0016740;000166;0004143;0019992	intracellular signaling cascade ;protein kinase C activation ;metal ion binding ;transferase activity ;nucleotide binding ;diacylglycerol kinase activity ;diacylglycerol binding	DGKQ	823.372	731.041	859.609	855.397	684.14	891.938	964.935	665.919	851.769	794.341	914.41	773.127	782.38	955.104	1032.05	1105.56	1019.5	657.987	496.104	749.791	1105.56
1397148	ILMN_10354	LOC158318	Homo sapiens similar to hypothetical protein MGC42630 (LOC158318), mRNA.	NM_001024608.1	0.05855	0.08462	1.43737	0.0369324	LOC158318	0006412;0003735;0003723;0005622;0005840	protein biosynthesis ;structural constituent of ribosome ;RNA binding ;intracellular ;ribosome	LOC158318	23.9045	32.8202	54.5592	18.3921	29.5558	16.2178	49.7752	27.011	31.9173	56.6899	32.3555	45.809	39.8118	40.5565	33.4875	24.2761	61.1749	28.1721	28.3985	53.2148	61.1749
1383762	ILMN_2760	CASP9	Homo sapiens caspase 9, apoptosis-related cysteine peptidase (CASP9), transcript variant alpha, mRNA.	NM_001229.2	0.24686	0.27888	1.12345	0.0370546	CASP9	0008632;0042981;0008635;0006508;0008233;0005515;0030693;0008047;0005622	apoptotic program ;regulation of apoptosis ;caspase activation via cytochrome c ;proteolysis and peptidolysis ;peptidase activity ;protein binding ;caspase activity ;enzyme activator activity ;intracellular	CASP9	116.301	104.106	140.373	110.379	121.604	122.514	120.346	145.053	125.153	138.946	120.295	136.657	128.442	130.979	140.64	131.322	138.62	95.9938	121.418	137.64	145.053
1387495	ILMN_22527	LOC57228	Homo sapiens small trans-membrane and glycosylated protein (LOC57228), transcript variant 1, mRNA.	NM_001031628.1	0.08389	0.05486	-1.53748	0.0370937	LOC57228	0006355;0006350;0006366;0006260;0003700;005634	regulation of transcription DNA-dependent ;transcription ;transcription from RNA polymerase II promoter ;DNA replication ;transcription factor activity ;nucleus	LOC57228	23.1521	27.0681	44.8581	61.362	42.6261	28.6382	30.9509	49.7988	26.6161	20.8871	26.0976	33.7109	9.60371	29.1961	16.6542	28.0163	22.0429	42.6357	92.881	63.6082	92.881
1379037	ILMN_6971	LCP2	Homo sapiens lymphocyte cytosolic protein 2 (SH2 domain containing leukocyte protein of 76kDa) (LCP2), mRNA.	NM_005565.3	0.35961	0.25993	-1.39118	0.0371423	LCP2	0007169;0006955;0007242;0005515	transmembrane receptor protein tyrosine kinase signaling pathway ;immune response ;intracellular signaling cascade ;protein binding	LCP2	144.364	131.537	214.311	190.717	296.397	228.835	88.1459	114.937	100.077	138.599	135.72	100.382	143.693	174.69	128.166	82.9344	134.309	127.147	217.519	106.601	296.397
1396931	ILMN_10692	PFKFB2	Homo sapiens 6-phosphofructo-2-kinase/fructose-2,6-biphosphatase 2 (PFKFB2), transcript variant 2, mRNA.	NM_001018053.1	0.22725	0.30016	1.31354	0.0372015	PFKFB2	0008152;0006003;000166;0004331;0016787;0016301;0016740;0005524;0003873	metabolism ;fructose 26-bisphosphate metabolism ;nucleotide binding ;fructose-26-bisphosphate 2-phosphatase activity ;hydrolase activity ;kinase activity ;transferase activity ;ATP binding ;6-phosphofructo-2-kinase activity	PFKFB2	131.677	76.5636	158.447	86.874	132.782	130.903	155.521	102.22	100.229	159.029	140.042	177.039	155.082	161.623	144.354	139.48	162.998	79.5722	62.2971	100.743	177.039
1388312	ILMN_21502	ACVR1	Homo sapiens activin A receptor, type I (ACVR1), mRNA.	NM_001105.2	1.62315	1.38241	-1.18065	0.0373337	ACVR1	0006468;0007178;000166;0004872;0016740;0005524;0005024;0016020;0005887	protein amino acid phosphorylation ;transmembrane receptor protein serine/threonine kinase signaling pathway ;nucleotide binding ;receptor activity ;transferase activity ;ATP binding ;transforming growth factor beta receptor activity ;membrane ;integral to plasma membrane	ACVR1	1028.87	740.418	580.335	969.208	875.062	610.107	755.788	1016.07	710.831	762.14	725.083	766.649	791.653	650.298	650.372	642.099	697.278	916.86	917.658	798.216	1028.87
1386361	ILMN_2423	ANKRD37	Homo sapiens ankyrin repeat domain 37 (ANKRD37), mRNA.	NM_181726.1	0.58719	0.84352	1.42862	0.0373338	ANKRD37	4872	receptor activity	ANKRD37	128.231	389.488	360.726	245.205	342.674	263.006	457.785	198.274	361.146	263.166	337.786	422.599	507.178	439.875	488.043	476.742	238.46	133.024	409.963	717.757	717.757
1391538	ILMN_17046	DIDO1	Homo sapiens death inducer-obliterator 1 (DIDO1), transcript variant 3, mRNA.	NM_080797.2	0.4242	0.57521	1.34851	0.0374893	DIDO1	0006915;0006355;0006350;0046872;0008270;0005515;0005634	apoptosis ;regulation of transcription DNA-dependent ;transcription ;metal ion binding ;zinc ion binding ;protein binding ;nucleus	DIDO1	167.671	137.921	198.19	269.998	301.917	365.601	275.954	159.847	307.97	277.599	237.567	318.888	390.315	278.512	205.7	257.587	337.924	122.093	107.72	227.405	390.315
1379354	ILMN_6526	RNF182	Homo sapiens ring finger protein 182 (RNF182), mRNA.	NM_152737.1	0.55624	0.84487	1.51053	0.0375182	RNF182	0016567;0004842;0046872;0008270;000151	protein ubiquitination ;ubiquitin-protein ligase activity ;metal ion binding ;zinc ion binding ;ubiquitin ligase complex	RNF182	415.425	276.617	167.543	274.923	361.122	225.671	410.823	231.987	359.093	748.146	278.006	706.167	433.988	379.047	460.431	186.407	364.09	330.503	90.0371	343.277	748.146
1391746	ILMN_16905	COL5A3	Homo sapiens collagen, type V, alpha 3 (COL5A3), mRNA.	NM_015719.2	0.14316	0.20792	1.44435	0.0375819	COL5A3	0006817;0009887;0007155;0007517;0005201;0005588;0005737;0005581	phosphate transport ;organ morphogenesis ;cell adhesion ;muscle development ;extracellular matrix structural constituent ;collagen type V ;cytoplasm ;collagen	COL5A3	59.6468	39.8968	54.6528	54.3699	82.4657	57.2692	118.243	72.6538	57.5314	139.606	60.4894	125.961	85.0094	72.3048	88.9298	87.7353	99.2407	124.159	49.4759	163.836	163.836
1396075	ILMN_11901	LPHN2	Homo sapiens latrophilin 2 (LPHN2), mRNA.	NM_012302.2	2.24852	2.72561	1.2055	0.0376248	LPHN2	0007165;0007186;0007218;0016524;0004872;0004930;0005529;0016021;0016020	signal transduction ;G-protein coupled receptor protein signaling pathway ;neuropeptide signaling pathway ;latrotoxin receptor activity ;receptor activity ;G-protein coupled receptor activity ;sugar binding ;integral to membrane ;membrane	LPHN2	1603.69	1138.2	944.251	1403.52	1045.17	1127.74	1197.2	1432.84	1134.27	1384.46	1175.72	988.623	1790.1	1562.46	1484.4	1523.94	1810.33	1027.66	1070.74	1738.29	1810.33
1394384	ILMN_13774	MAFF	Homo sapiens v-maf musculoaponeurotic fibrosarcoma oncogene homolog F (avian) (MAFF), transcript variant 1, mRNA.	NM_012323.2	0.13025	0.06488	-2.01863	0.0376543	MAFF	0006355;0007567;0006350;0006366;0003677;0005634	regulation of transcription DNA-dependent ;parturition ;transcription ;transcription from RNA polymerase II promoter ;DNA binding ;nucleus	MAFF	104.525	16.6631	53.5303	26.3111	39.8846	80.0585	32.9911	44.0449	15.2933	37.1093	15.057	68.9308	49.4561	15.1998	26.4464	45.8767	8.70328	132.348	121.627	43.0013	132.348
1379399	ILMN_6595	DUT	Homo sapiens dUTP pyrophosphatase (DUT), nuclear gene encoding mitochondrial protein, transcript variant 1, mRNA.	NM_001025248.1	0.45081	0.49689	1.09615	0.0376962	DUT	0046080;0009117;0006260;000287;0016787;0004170;0005739;0005634	dUTP metabolism ;nucleotide metabolism ;DNA replication ;magnesium ion binding ;hydrolase activity ;dUTP diphosphatase activity ;mitochondrion ;nucleus	DUT	212.806	207.329	222.749	238.193	218.619	208.379	214.451	239.385	247.255	276.007	230.254	267.764	287.46	217.019	210.721	224.193	241.121	207.679	225.906	224.93	287.46
1386646	ILMN_23744	TM7SF4	Homo sapiens transmembrane 7 superfamily member 4 (TM7SF4), mRNA.	NM_030788.2	0.07117	0.03511	-2.03835	0.037857	TM7SF4	0030316;0016021;0009986	osteoclast differentiation ;integral to membrane ;cell surface	TM7SF4	68.4663	37.7163	24.9462	53.0887	21.9627	53.8849	28.919	19.0246	6.61993	21.6094	18.9078	13.7781	7.97644	10.9597	14.8062	28.9298	31.0131	23.4473	15.4812	18.462	68.4663
1389875	ILMN_19304	LRCH1	Homo sapiens leucine-rich repeats and calponin homology (CH) domain containing 1 (LRCH1), mRNA.	NM_015116.1	0.0549	0.08085	1.46472	0.0378629	LRCH1	0006508;0046872;0004177;0008270;0004179;0008237	proteolysis and peptidolysis ;metal ion binding ;aminopeptidase activity ;zinc ion binding ;membrane alanyl aminopeptidase activity ;metallopeptidase activity	LRCH1	20.0863	26.6278	45.9963	37.0281	29.0846	14.6697	42.5003	14.0917	37.8096	24.8613	39.3843	28.0102	49.2388	35.339	32.4054	50.3899	62.1587	34.1227	23.1903	38.5624	62.1587
1384135	ILMN_27248	C7orf29	Homo sapiens chromosome 7 open reading frame 29 (C7orf29), mRNA.	NM_138434.2	0.05872	0.04021	-1.46841	0.0380791	C7orf29	0006511;0006512;0046872;0004197;0008270;0004221	ubiquitin-dependent protein catabolism ;ubiquitin cycle ;metal ion binding ;cysteine-type endopeptidase activity ;zinc ion binding ;ubiquitin thiolesterase activity	C7orf29	16.6415	30.9377	32.2542	7.7406	16.5456	25.1632	26.5564	53.1393	10.7181	23.7247	19.3242	22.3021	19.2947	21.7957	14.792	18.0962	29.276	58.4863	56.4386	23.0705	58.4863
1377550	ILMN_9111	RHPN1	Homo sapiens rhophilin, Rho GTPase binding protein 1 (RHPN1), mRNA.	NM_052924.1	0.20258	0.27265	1.3385	0.0382174	RHPN1	0007165;0005515;0005622	signal transduction ;protein binding ;intracellular	RHPN1	61.8985	86.6066	145.25	58.4873	79.1419	103.142	158.615	54.7619	100.932	148.154	113.164	104.535	100.319	116.9	147.508	178.029	122.148	147.131	102.693	158.162	178.029
1393448	ILMN_14344	ITGA1	Homo sapiens integrin, alpha 1 (ITGA1), mRNA.	NM_181501.1	0.08914	0.03875	-2.31308	0.03828	ITGA1	0007160;0007155;0007229;000287;0005518;0004872;0005509;0016021;0016020;0008305	cell-matrix adhesion ;cell adhesion ;integrin-mediated signaling pathway ;magnesium ion binding ;collagen binding ;receptor activity ;calcium ion binding ;integral to membrane ;membrane ;integrin complex	ITGA1	35.6796	5.64684	26.9079	31.0823	82.2067	29.9179	31.6948	54.7275	12.7428	6.59142	18.6086	22.6152	20.0165	20.8402	16.1337	10.4288	14.5808	35.3603	128.928	51.6877	128.928
1377580	ILMN_8943	SEMA5A	Homo sapiens sema domain, seven thrombospondin repeats (type 1 and type 1-like), transmembrane domain (TM) and short cytoplasmic domain, (semaphorin) 5A (SEMA5A), mRNA.	NM_003966.1	0.34934	0.2637	-1.33209	0.0383536	SEMA5A	0007267;0030154;0007155;0007399;0004872;0016020;0016021	cell-cell signaling ;cell differentiation ;cell adhesion ;neurogenesis ;receptor activity ;membrane ;integral to membrane	SEMA5A	152.511	229.555	180.434	190.035	98.1798	106.739	189.772	135.58	103.533	94.5688	155.917	141.599	66.786	103.806	153.167	114.743	110.945	175.072	230.439	209.729	230.439
1388442	ILMN_21253	SNRP70	Homo sapiens small nuclear ribonucleoprotein 70kDa polypeptide (RNP antigen) (SNRP70), transcript variant 1, mRNA.	NM_003089.4	5.76521	7.22796	1.24681	0.0384183	SNRP70	0006397;0008380;000166;0003723;0030529;0005634	mRNA processing ;RNA splicing ;nucleotide binding ;RNA binding ;ribonucleoprotein complex ;nucleus	SNRP70	2167.47	2332.75	3533.67	3255.71	3764.73	4577.6	3453.65	3210.05	3393.05	5458.63	3371.27	5100.98	4174.31	3843.46	2920.34	4836.82	4419.44	3028.08	2816.71	3181.07	5458.63
1395181	ILMN_13075	RBM6	Homo sapiens RNA binding motif protein 6 (RBM6), mRNA.	NM_005777.1	1.01281	1.29217	1.2688	0.0384665	RBM6	0006396;000166;0003723;0003677;0005634	RNA processing ;nucleotide binding ;RNA binding ;DNA binding ;nucleus	RBM6	427.653	302.441	480.755	410.957	535.028	542.772	717.916	495.605	532.422	866.999	566.59	875.438	572.182	526.495	455.317	866.249	674.849	654.825	552.562	733.414	875.438
1391315	ILMN_17415	MTFMT	Homo sapiens mitochondrial methionyl-tRNA formyltransferase (MTFMT), mRNA.	NM_139242.2	0.511	0.42511	-1.20871	0.0386139	MTFMT	0006412;0009058;0004479;0016740;0008168;0005739	protein biosynthesis ;biosynthesis ;methionyl-tRNA formyltransferase activity ;transferase activity ;methyltransferase activity ;mitochondrion	MTFMT	251.815	239.27	230.404	243.427	192.273	208.133	203.369	305.597	216.351	198.152	247.144	208.745	161.016	213.049	196.451	241.703	183.399	242.159	372.304	194.723	372.304
1389340	ILMN_20101	CD37	Homo sapiens CD37 antigen (CD37), mRNA.	NM_001774.1	0.14135	0.07895	-1.80019	0.0386758	CD37	0006487;0016021;0005887;0005886	protein amino acid N-linked glycosylation ;integral to membrane ;integral to plasma membrane ;plasma membrane	CD37	27.914	53.8542	77.2624	55.8772	78.597	98.6476	49.9915	51.0584	23.7719	69.1232	33.3607	28.0726	54.206	64.3544	31.6661	12.8316	45.0731	163.479	52.9754	18.757	163.479
1395018	ILMN_13274	CYBB	Homo sapiens cytochrome b-245, beta polypeptide (chronic granulomatous disease) (CYBB), mRNA.	NM_000397.2	0.26857	0.14977	-1.8032	0.0389323	CYBB	0006811;0006118;0006954;0019735;0046872;0005506;0005489;0016491;0005244;0016021;0016020;005739	ion transport ;electron transport ;inflammatory response ;antimicrobial humoral response (sensu Vertebrata) ;metal ion binding ;iron ion binding ;electron transporter activity ;oxidoreductase activity ;voltage-gated ion channel activity ;integral to membrane ;membrane ;mitochondrion	CYBB	87.8058	75.2287	144.284	101.433	232.574	287.678	64.2334	67.5042	29.5195	133.559	69.8401	73.2016	94.6481	77.7969	77.547	22.8801	67.4533	157.223	108.413	67.5287	287.678
1396380	ILMN_11463	STX1A	Homo sapiens syntaxin 1A (brain) (STX1A), mRNA.	NM_004603.1	8.14765	9.73341	1.18804	0.039087	STX1A	0050796;0006886;0006887;0006836;0008565;0005515;0016021;0016020	regulation of insulin secretion ;intracellular protein transport ;exocytosis ;neurotransmitter transport ;protein transporter activity ;protein binding ;integral to membrane ;membrane	STX1A	5865.18	6466.6	4714.47	6134.39	4289.04	3778.82	5513.43	4276.58	6010.78	4428.46	4752.29	4967.05	5823.29	4282.23	6393.05	7664.39	5956.84	3696.24	3006.68	5931.91	7664.39
1383372	ILMN_28203	LHX2	Homo sapiens LIM homeobox 2 (LHX2), mRNA.	NM_004789.3	5.16788	6.77959	1.30464	0.0391051	LHX2	0006355;0046872;0008270;0003700;0005634	regulation of transcription DNA-dependent ;metal ion binding ;zinc ion binding ;transcription factor activity ;nucleus	LHX2	3435.68	3151.11	1871.68	2628.52	3968.26	2817.97	4108.34	2715.97	3051.44	4949.47	2317.35	4761.53	3808.67	4015.14	3774.84	2953.71	3597.83	3303.89	891.544	4633.83	4949.47
1381654	ILMN_3414	COTL1	Homo sapiens coactosin-like 1 (Dictyostelium) (COTL1), mRNA.	NM_021149.2	0.32343	0.25702	-1.26536	0.0391688	COTL1	0004;0003779;0019899;0005856	biological process unknown ;actin binding ;enzyme binding ;cytoskeleton	COTL1	136.124	103.471	154.936	116.53	200.043	164.902	130.254	149.353	74.8977	195.304	102.838	151.599	123.838	99.8099	131.743	128.723	101.46	229.101	179.689	108.488	229.101
1388559	ILMN_21196	RAB9B	Homo sapiens RAB9B, member RAS oncogene family (RAB9B), mRNA.	NM_016370.1	1.37106	1.6726	1.21321	0.0392066	RAB9B	0006886;0007264;0006895;000166;0005525;0005795	intracellular protein transport ;small GTPase mediated signal transduction ;Golgi to endosome transport ;nucleotide binding ;GTP binding ;Golgi stack	RAB9B	657.481	920.635	802.128	841.878	585.991	740.397	835.596	922.387	735.594	896.14	860.305	680.506	1117.93	870.55	1016.27	978.93	925.183	386.921	473.8	758.832	1117.93
1395156	ILMN_13048	STAB1	Homo sapiens stabilin 1 (STAB1), mRNA.	NM_015136.2	0.71699	0.3199	-2.25371	0.0392252	STAB1	0007267;0016525;0006898;0007155;0042742;0006954;0005540;0005041;0005198;0005515;0015035;0004872;0005044;0005509;0008367;0005887	cell-cell signaling ;negative regulation of angiogenesis ;receptor mediated endocytosis ;cell adhesion ;defense response to bacteria ;inflammatory response ;hyaluronic acid binding ;low-density lipoprotein receptor activity ;structural molecule activity ;protein binding ;protein disulfide oxidoreductase activity ;receptor activity ;scavenger receptor activity ;calcium ion binding ;bacterial bindi…	STAB1	114.014	87.2856	182.751	289.215	501.378	672.271	199.598	127.411	70.5449	339.788	109.649	273.649	184.431	201.669	124.579	69.8458	69.7784	793.591	613.229	110.369	793.591
1387910	ILMN_22043	RAB26	Homo sapiens RAB26, member RAS oncogene family (RAB26), mRNA.	NM_014353.4	1.69511	2.073	1.21619	0.0393278	RAB26	0007264;000166;0005525;0008372	small GTPase mediated signal transduction ;nucleotide binding ;GTP binding ;cellular component unknown	RAB26	1048.84	869.157	1096.8	1022.3	841.701	1007.62	1075.84	839.168	967.33	1168.25	830.35	1011.17	1307.57	889.581	1288.52	1116.08	1015.23	718.332	405.164	1375.5	1375.5
1383206	ILMN_2841	EIF4E2	Homo sapiens eukaryotic translation initiation factor 4E member 2 (EIF4E2), mRNA.	NM_004846.2	0.31828	0.27549	-1.16176	0.0393361	EIF4E2	0006445;0006413;000339;0005515;0003743;0005737	regulation of translation ;translational initiation ;RNA cap binding ;protein binding ;translation initiation factor activity ;cytoplasm	EIF4E2	93.7318	166.017	148.804	193.943	142.774	151.645	145.221	152.511	143.823	122.686	145.625	137.913	119.315	166.799	142.883	112.541	125.565	173.563	177.876	106.067	193.943
1394940	ILMN_13385	MAGED2	Homo sapiens melanoma antigen family D, 2 (MAGED2), transcript variant 3, mRNA.	NM_201222.1	0.38611	0.3212	-1.20874	0.0394073	MAGED2	0016740;0008757	transferase activity ;S-adenosylmethionine-dependent methyltransferase activity	MAGED2	130.686	161.498	213.331	170.1	159.406	169.399	179.951	196.498	189.876	151.322	152.112	116.072	153.112	137.977	149.622	144.517	189.052	193.51	290.746	155.292	290.746
1392206	ILMN_16212	GYPC	Homo sapiens glycophorin C (Gerbich blood group) (GYPC), transcript variant 1, mRNA.	NM_002101.3	0.29297	0.19961	-1.47582	0.0394135	GYPC	0006493;0009887;0006487;0005887;0005886	protein amino acid O-linked glycosylation ;organ morphogenesis ;protein amino acid N-linked glycosylation ;integral to plasma membrane ;plasma membrane	GYPC	82.2874	81.9668	94.6108	122.45	149.357	181.713	145.82	135.387	79.9686	123.558	110.187	68.6086	70.6457	122.977	123.076	57.9191	83.0138	135.137	290.305	113.471	290.305
1392497	ILMN_15727	CINP	Homo sapiens cyclin-dependent kinase 2-interacting protein (CINP), mRNA.	NM_032630.2	0.13887	0.11171	-1.24994	0.039416	CINP	16301	kinase activity	CINP	43.8322	62.2929	61.5531	50.9087	63.4513	77.3799	50.397	87.7877	49.1018	49.0023	47.1206	65.0198	40.1215	79.7928	51.3313	57.288	48.9024	99.7019	98.9569	57.2149	99.7019
1385218	ILMN_25698	LARP6	Homo sapiens La ribonucleoprotein domain family, member 6 (LARP6), transcript variant 2, mRNA.	NM_197958.1	1.15808	0.80913	-1.4392	0.0394512	LARP6	0006405;0006396;000166;0003723;0005737;0030529;0005634	RNA-nucleus export ;RNA processing ;nucleotide binding ;RNA binding ;cytoplasm ;ribonucleoprotein complex ;nucleus	LARP6	487	452.883	1088.74	675.988	536.021	343.682	458.177	521.593	659.557	298.344	764.904	477.105	308.96	328.791	287.022	372.551	362.294	555.117	771.21	253.226	1088.74
1390149	ILMN_19022	OPRD1	Homo sapiens opioid receptor, delta 1 (OPRD1), mRNA.	NM_000911.3	0.12162	0.1446	1.18236	0.0394528	OPRD1	0006955;0007165;0007187;0007600;0004872;0004986;0001584;0005887;0005886	immune response ;signal transduction ;G-protein signaling coupled to cyclic nucleotide second messenger ;sensory perception ;receptor activity ;delta-opioid receptor activity ;rhodopsin-like receptor activity ;integral to plasma membrane ;plasma membrane	OPRD1	55.3069	56.0857	68.0159	48.3515	60.6114	52.5976	64.3428	79.5639	56.096	63.2874	65.0423	56.6684	69.6688	78.2497	72.3502	62.8597	88.9032	78.1894	49.5151	79.8543	88.9032
1377868	ILMN_8689	EML1	Homo sapiens echinoderm microtubule associated protein like 1 (EML1), transcript variant 2, mRNA.	NM_004434.2	0.80301	0.66858	-1.20771	0.0394585	EML1	0007601;0005875;0005874	visual perception ;microtubule associated complex ;microtubule	EML1	324.256	422.844	542.394	495.86	339.067	259.503	355.326	440.36	411.632	257.106	363.603	379.567	333.55	307.726	303.48	266.923	338.144	352.005	490.12	367.362	542.394
1394563	ILMN_137393	PSARL	Homo sapiens presenilin associated, rhomboid-like (PSARL), mRNA.	NM_018622.4	3.17833	2.91114	-1.09783	0.0394822	PSARL	0008233;0004252;0005739;0016021;0005634	peptidase activity ;serine-type endopeptidase activity ;mitochondrion ;integral to membrane ;nucleus	PSARL	1832.5	1893.6	1689.3	1480.16	1595.28	1686.47	2051.64	1668.24	1307.34	1545.55	1462.87	1524.03	1487.34	1604.03	1876.74	1837.48	1496.2	1642.84	1713.94	1464.2	2051.64
1388440	ILMN_21251	FLJ35220	Homo sapiens hypothetical protein FLJ35220 (FLJ35220), mRNA.	NM_173627.2	0.32158	0.3877	1.19898	0.0394914	FLJ35220	0006281;000287;0004519;0016787	DNA repair ;magnesium ion binding ;endonuclease activity ;hydrolase activity	FLJ35220	149.88	119.821	128.108	151.318	151.416	143.694	166.938	177.244	156.955	191.711	122.581	140.341	193.251	185.296	181.323	225.677	218.205	176.238	190.997	247.502	247.502
1387711	ILMN_22390	VAV3	Homo sapiens vav 3 oncogene (VAV3), mRNA.	NM_006113.3	0.17481	0.23886	1.35887	0.0395082	VAV3	0007264;0007242;0046872;0005070;0019992;0005096;0005085	small GTPase mediated signal transduction ;intracellular signaling cascade ;metal ion binding ;SH3/SH2 adaptor activity ;diacylglycerol binding ;GTPase activator activity ;guanyl-nucleotide exchange factor activity	VAV3	97.4853	78.5215	107.476	98.9894	85.9862	41.8835	131.642	62.9178	118.382	113.646	152.346	145.053	103.089	141.052	61.1078	74.354	124.227	106.89	45.9092	114.588	152.346
1388007	ILMN_21952	CTBP1	Homo sapiens C-terminal binding protein 1 (CTBP1), transcript variant 2, mRNA.	NM_001012614.1	1.76463	2.0693	1.16619	0.0395594	CTBP1	0008152;0019079;0006564;0008285;0006468;0016616;0008022;0016491;0051287;0005795;005634	metabolism ;viral genome replication ;L-serine biosynthesis ;negative regulation of cell proliferation ;protein amino acid phosphorylation ;oxidoreductase activity acting on the CH-OH group of donors NAD or NADP as acceptor ;protein C-terminus binding ;oxidoreductase activity ;NAD binding ;Golgi stack ;nucleus	CTBP1	1188.82	1103.85	836.734	902.753	836.029	833.222	949.942	958.171	1018.07	1145.46	973.271	856.351	1328.7	855.01	1177.11	1322.91	1279.91	1036.9	635.635	1045.76	1328.7
1391740	ILMN_16897	LIN28B	Homo sapiens lin-28 homolog B (C. elegans) (LIN28B), mRNA.	NM_001004317.2	0.13657	0.18864	1.37366	0.0396189	LIN28B	0006355;0003677;0005634	regulation of transcription DNA-dependent ;DNA binding ;nucleus	LIN28B	71.0416	48.9663	46.9817	76.9134	85.555	77.2278	89.8128	78.8081	78.8922	72.2139	63.9934	61.5266	141.2	91.6176	64.3753	116.518	99.1802	65.2928	33.0617	102.815	141.2
1380431	ILMN_5109	RAGE	Homo sapiens renal tumor antigen (RAGE), mRNA.	NM_014226.1	1.52725	1.88617	1.22821	0.0396401	RAGE	0007165;0006468;0004674;0016740;000166;0005524;0005737	signal transduction ;protein amino acid phosphorylation ;protein serine/threonine kinase activity ;transferase activity ;nucleotide binding ;ATP binding ;cytoplasm	RAGE	1019.05	497.204	827.622	694.315	774.82	800.644	1036.87	937.896	886.705	1169.25	633.351	944.018	1083.36	923.31	883.688	1196.44	1008.31	848.634	512.197	1214.27	1214.27
1389670	ILMN_19684	NSUN5C	Homo sapiens NOL1/NOP2/Sun domain family, member 5C (NSUN5C), transcript variant 3, mRNA.	NM_148980.1	0.20112	0.26978	1.33396	0.0396905	NSUN5C	16021	integral to membrane	NSUN5C	44.1228	70.5535	117.747	113.343	99.3466	142.014	105.884	104.85	86.4045	170.671	82.0353	162.309	98.4726	177.544	92.973	129.004	173.367	85.1226	109.376	113.319	177.544
1387225	ILMN_22994	AAAS	Homo sapiens achalasia, adrenocortical insufficiency, alacrimia (Allgrove, triple-A) (AAAS), mRNA.	NM_015665.3	0.14869	0.17641	1.17985	0.0397161	AAAS	0046822;0005554;0005643	regulation of nucleocytoplasmic transport ;molecular function unknown ;nuclear pore	AAAS	53.764	51.9798	60.3953	61.2643	78.5011	54.9467	73.5197	91.5128	80.1598	98.4298	73.6816	96.4704	76.6053	64.5721	68.0097	93.596	79.7111	97.181	116.818	106.24	116.818
1389569	ILMN_19760	SOD2	Homo sapiens superoxide dismutase 2, mitochondrial (SOD2), nuclear gene encoding mitochondrial protein, transcript variant 2, mRNA.	NM_001024465.1	0.92547	0.41645	-2.2346	0.0397469	SOD2	0006801;0006357;0006979;0016066;000303;0001315;0030145;0046872;0004784;0008383;0016491;0005739	superoxide metabolism ;regulation of transcription from RNA polymerase II promoter ;response to oxidative stress ;cellular defense response (sensu Vertebrata) ;response to superoxide ;age-dependent response to reactive oxygen species ;manganese ion binding ;metal ion binding ;superoxide dismutase activity ;manganese superoxide dismutase activity ;oxidoreductase activity ;mitochondrion	SOD2	686.653	287.87	245.028	174.608	1227.84	423.139	156.562	180.972	156.767	168.782	167.833	464.678	196.696	274.943	175.529	98.2549	158.091	464.267	841.176	177.343	1227.84
1377234	ILMN_9583	GTF2F2	Homo sapiens general transcription factor IIF, polypeptide 2 (30kD subunit) (GTF2F2), mRNA.	NM_004128.1	1.95968	1.76479	-1.11659	0.0398448	GTF2F2	000398;0003723;0005681	nuclear mRNA splicing via spliceosome ;RNA binding ;spliceosome complex	GTF2F2	884.982	1182.77	934.434	1203.39	1138.92	1097.07	1116.67	1085.69	1009.15	988.086	1031.03	1105.93	934.598	856.786	897.886	751.682	807.928	799.156	920.333	916.002	1203.39
1378215	ILMN_8058	CYGB	Homo sapiens cytoglobin (CYGB), mRNA.	NM_134268.3	1.68021	1.41178	-1.19673	0.0398736	CYGB	0015671;0006810;0046872;0020037;0019825;0005344;0005506;0005737	oxygen transport ;transport ;metal ion binding ;heme binding ;oxygen binding ;oxygen transporter activity ;iron ion binding ;cytoplasm	CYGB	986.318	1107.28	812.696	768.267	617.825	651.594	969.75	884.234	580.339	828.454	784.888	564.893	886.563	589.004	798.907	781.565	735.124	883.014	1082.95	829.719	1107.28
1394112	ILMN_138678	SORBS1	Homo sapiens sorbin and SH3 domain containing 1 (SORBS1), transcript variant 1, mRNA.	NM_006434.1	0.13763	0.19865	1.43546	0.0399512	SORBS1	0043149;0006810;0015758;0008286;0048041;0003779;0005158;0005924;0005915;0045121;0016020;0001725;0005634	stress fiber formation ;transport ;glucose transport ;insulin receptor signaling pathway ;focal adhesion formation ;actin binding ;insulin receptor binding ;cell-substrate adherens junction ;zonula adherens ;lipid raft ;membrane ;stress fiber ;nucleus	SORBS1	48.7508	30.2768	83.0298	67.387	102.855	85.8033	120.234	55.847	72.5555	121.613	53.7304	117.884	103.625	119.207	79.4966	116.37	81.5517	39.0062	59.1268	75.1071	121.613
1393335	ILMN_1466	PH-4	Homo sapiens hypoxia-inducible factor prolyl 4-hydroxylase (PH-4), transcript variant 2, mRNA.	NM_017732.3	0.0774	0.10894	1.39985	0.0401004	PH-4	0019538;0031418;0016706;0005506;0005509;0016491;0016702;0016020;0005783	protein metabolism ;L-ascorbic acid binding ;oxidoreductase activity acting on paired donors with incorporation or reduction of molecular oxygen 2-oxoglutarate as one donor and incorporation of one atom each of oxygen into both donors ;iron ion binding ;calcium ion binding ;oxidoreductase activity ;oxidoreductase activity acting on single donors with incorporation of molecular oxygen incorporatio…	PH-4	29.7856	13.0363	75.8443	36.2389	49.0494	46.3226	52.1754	31.5406	42.0224	56.3306	59.4915	62.8318	59.3387	40.1638	50.5989	55.5041	55.3147	37.6	31.8894	47.1661	75.8443
1386882	ILMN_23418	PICALM	Homo sapiens phosphatidylinositol binding clathrin assembly protein (PICALM), transcript variant 1, mRNA.	NM_007166.2	0.45952	0.36498	-1.26602	0.0402328	PICALM	0006461;0006898;0030276;0005543;0005545;0005905;0005795	protein complex assembly ;receptor mediated endocytosis ;clathrin binding ;phospholipid binding ;phosphatidylinositol binding ;coated pit ;Golgi stack	PICALM	198.397	218.248	242.513	212.267	159.281	179.936	147.638	316.182	197.39	206.257	233.216	199.745	179.093	122.423	146.956	164.507	163.576	322.137	237.568	145.7	322.137
1378175	ILMN_821	C16orf33	Homo sapiens chromosome 16 open reading frame 33 (C16orf33), mRNA.	NM_024571.2	4.18758	4.69048	1.11392	0.0402573	C16orf33	6464	protein modification	C16orf33	2531.91	2688.74	2626.31	2664.99	2163.79	2056.45	2653.87	2074.92	2807.77	2279.91	2786.47	2146.92	2910.59	2646.2	2890.9	2274.3	2563.95	1744.4	1800.82	2443.39	2910.59
1391016	ILMN_1785	STH	Homo sapiens saitohin (STH), mRNA.	NM_001007532.1	0.26489	0.4359	1.63648	0.0402819	STH	0006511;0006512;0004197;0004221;0005488	ubiquitin-dependent protein catabolism ;ubiquitin cycle ;cysteine-type endopeptidase activity ;ubiquitin thiolesterase activity ;binding	STH	64.0585	33.0939	139.003	58.2172	157.29	164.027	152.666	207.319	102.659	249.294	114.848	244.371	166.616	173.11	108.835	290.808	216.293	141.971	182.257	440.425	440.425
1378468	ILMN_7746	JUN	Homo sapiens v-jun sarcoma virus 17 oncogene homolog (avian) (JUN), mRNA.	NM_002228.3	0.30355	0.2102	-1.45215	0.0403805	JUN	0006355;0006350;0008134;0003702;0046983;0043565;0003700;000228	regulation of transcription DNA-dependent ;transcription ;transcription factor binding ;RNA polymerase II transcription factor activity ;protein dimerization activity ;sequence-specific DNA binding ;transcription factor activity ;nuclear chromosome	JUN	209.11	138.847	104.587	182.921	137.174	119.755	117.678	70.1767	92.7006	89.7134	85.654	83.6912	151.454	84.731	110.092	59.3232	106.551	263.982	133.954	134.663	263.982
1380328	ILMN_5191	UCHL3	Homo sapiens ubiquitin carboxyl-terminal esterase L3 (ubiquitin thiolesterase) (UCHL3), mRNA.	NM_006002.3	0.89066	0.71911	-1.24542	0.0403999	UCHL3	0006511;0006512;0008234;0004221;0005737	ubiquitin-dependent protein catabolism ;ubiquitin cycle ;cysteine-type peptidase activity ;ubiquitin thiolesterase activity ;cytoplasm	UCHL3	460.105	575.645	451.308	476.73	441.678	602.309	504.658	336.938	460.368	353.902	468.151	341.246	342.103	327.628	374.75	285.946	429.07	207.989	488.504	228.09	602.309
1388174	ILMN_21742	IL1RAP	Homo sapiens interleukin 1 receptor accessory protein (IL1RAP), transcript variant 1, mRNA.	NM_002182.2	0.08994	0.04184	-2.1616	0.0406099	IL1RAP	0006461;0006954;0004908;0004888;0005515;0016020;0005887	protein complex assembly ;inflammatory response ;interleukin-1 receptor activity ;transmembrane receptor activity ;protein binding ;membrane ;integral to plasma membrane	IL1RAP	105.114	25.8185	37.2351	27.4908	53.3301	38.9761	21.7496	24.8405	11.7066	27.276	35.984	26.4132	10.5341	11.6623	32.231	13.2726	16.1025	36.711	85.4523	18.8037	105.114
1384982	ILMN_26013	RAI2	Homo sapiens retinoic acid induced 2 (RAI2), mRNA.	NM_021785.2	0.2827	0.35461	1.24747	0.0407262	RAI2	0009790;0005554;0008372	embryonic development ;molecular function unknown ;cellular component unknown	RAI2	132.714	142.171	145.773	152.68	141.094	145.498	210.923	112.976	177.059	199.091	162.462	123.519	224.778	164.928	193.553	164.073	152.543	92.2626	108.828	142.303	224.778
1379359	ILMN_6530	C1orf24	Homo sapiens chromosome 1 open reading frame 24 (C1orf24), transcript variant 1, mRNA.	NM_022083.1	0.29382	0.15943	-1.85315	0.0407454	C1orf24	0006457;0006810;0031072;0051082;0008372	protein folding ;transport ;heat shock protein binding ;unfolded protein binding ;cellular component unknown	C1orf24	76.1959	97.599	45.1174	121.691	339.148	217.456	93.1531	88.6642	40.0878	129.91	42.4004	64.8742	44.1933	98.1003	106.51	82.6932	67.6958	133.486	231.217	82.789	339.148
1390892	ILMN_17904	DNMT1	Homo sapiens DNA (cytosine-5-)-methyltransferase 1 (DNMT1), mRNA.	NM_001379.1	2.65321	3.09599	1.16045	0.0408089	DNMT1	0006355;0006306;0006350;000122;0046872;0003886;0008134;0003677;0016740;0008270;0008168;0005634	regulation of transcription DNA-dependent ;DNA methylation ;transcription ;negative regulation of transcription from RNA polymerase II promoter ;metal ion binding ;DNA (cytosine-5-)-methyltransferase activity ;transcription factor binding ;DNA binding ;transferase activity ;zinc ion binding ;methyltransferase activity ;nucleus	DNMT1	1503.12	1573.79	1358.06	1509.89	1615.96	1952.89	1507.83	1047.91	1801.74	1713	1690.94	1560.49	2100.11	1527.86	1480.53	1389.14	1970.19	988.97	1203.05	1391.62	2100.11
1388939	ILMN_20625	KBTBD11	Homo sapiens kelch repeat and BTB (POZ) domain containing 11 (KBTBD11), mRNA.	NM_014867.1	7.58035	8.61429	1.13013	0.0408435	KBTBD11	5515	protein binding	KBTBD11	5186.94	5843.91	3872.45	4328.96	4714.71	4260.85	4617.97	4788.63	4626.6	5338.03	4411.33	5126.52	4915.77	5016.6	5063.6	5585.22	5028.52	3803.38	2672.86	3982.63	5843.91
1378187	ILMN_8223	LOC126248	Homo sapiens hypothetical protein LOC126248 (LOC126248), mRNA.	NM_173479.2	0.07078	0.08631	1.21269	0.0408808	LOC126248	6118	electron transport	LOC126248	32.3644	31.707	27.6561	29.2582	31.0949	32.2068	25.5023	54.826	37.5659	53.5758	40.4814	51.698	43.8936	36.8656	40.8893	42.9623	29.3408	67.3086	49.533	49.6181	67.3086
1383335	ILMN_28376	DKFZP434A0131	Homo sapiens DKFZp434A0131 protein (DKFZP434A0131), transcript variant 1, mRNA.	NM_018991.2	0.60612	0.76912	1.26194	0.0409583	DKFZP434A0131	0008210;0008152;0006789;0007586;0015020;0005792;0016021;0016020;0005783	estrogen metabolism ;metabolism ;bilirubin conjugation ;digestion ;glucuronosyltransferase activity ;microsome ;integral to membrane ;membrane ;endoplasmic reticulum	DKFZP434A0131	146.051	211.741	504.86	278.136	268.753	356.519	368.844	252.204	336.576	417.929	341.832	502.798	322.176	478.024	326.698	409.316	460.663	315.225	301.158	270.228	504.86
1381488	ILMN_3642	LAMC3	Homo sapiens laminin, gamma 3 (LAMC3), mRNA.	NM_006059.2	0.2192	0.15868	-1.38905	0.0410586	LAMC3	0007155;0005198;0005515;0005578;0005604;00016020	cell adhesion ;structural molecule activity ;protein binding ;extracellular matrix (sensu Metazoa) ;basement membrane ;membrane	LAMC3	67.8708	63.0794	103.207	145.765	112.854	71.4791	111.667	118.683	50.7381	56.4784	70.0911	91.5457	34.0919	70.3263	53.0678	99.7454	80.5224	162.106	108.734	149.876	162.106
1378222	ILMN_8066	FIBP	Homo sapiens fibroblast growth factor (acidic) intracellular binding protein (FIBP), transcript variant 2, mRNA.	NM_004214.4	3.07158	2.55225	-1.21015	0.0411322	FIBP	0008543;0005515;0017134;0005624;0005739;0005634	fibroblast growth factor receptor signaling pathway ;protein binding ;fibroblast growth factor binding ;membrane fraction ;mitochondrion ;nucleus	FIBP	1530.96	1980.05	1479.47	1462.68	1347.46	1378.56	1516.39	1877.96	1365.69	1276.2	1389.05	1151.92	1120.41	1171.78	1422.67	1360.23	1328.85	2246.94	1882.25	2077.5	2246.94
1392995	ILMN_15078	CMTM3	Homo sapiens CKLF-like MARVEL transmembrane domain containing 3 (CMTM3), transcript variant 4, mRNA.	NM_181555.1	0.76899	0.46811	-1.65184	0.0411609	CMTM3	0007600;0006935;0005125;0005615;0016020;0016021	sensory perception ;chemotaxis ;cytokine activity ;extracellular space ;membrane ;integral to membrane	CMTM3	351.269	126.855	221.066	243.315	471.784	421.572	268.814	305.402	170.2	296.661	215.067	255.418	157.648	244.727	204.277	146.349	161.926	703.133	699.568	416.565	703.133
1387862	ILMN_22183	APLP1	Homo sapiens amyloid beta (A4) precursor-like protein 1 (APLP1), transcript variant 2, mRNA.	NM_005166.3	9.09357	7.86035	-1.1633	0.0411779	APLP1	0006897;0008219;0007155;0007399;0006915;0009887;0046872;0005515;0005507;0008201;0008270;0005604;0005905;0016021	endocytosis ;cell death ;cell adhesion ;neurogenesis ;apoptosis ;organ morphogenesis ;metal ion binding ;protein binding ;copper ion binding ;heparin binding ;zinc ion binding ;basement membrane ;coated pit ;integral to membrane	APLP1	5250.35	7736.57	6285.75	4572.1	4271.69	4961.54	4323.51	5313.77	4712.71	4894.54	5653.9	4492.22	3999.92	4023.35	4819.09	4617.77	3974.53	7040.03	4181.7	3345.29	7736.57
1391956	ILMN_16536	PSCD4	Homo sapiens pleckstrin homology, Sec7 and coiled-coil domains 4 (PSCD4), mRNA.	NM_013385.2	0.36152	0.15232	-2.3866	0.0412056	PSCD4	5086	ARF guanyl-nucleotide exchange factor activity	PSCD4	80.4621	50.7314	105.083	86.3259	310.001	281.391	80.3419	56.4901	40.986	100.615	80.8678	66.6261	77.5968	113.64	102.928	24.3605	66.9081	443.993	276.157	56.3496	443.993
1383182	ILMN_28604	ZCCHC3	Homo sapiens zinc finger, CCHC domain containing 3 (ZCCHC3), mRNA.	NM_033089.6	0.27682	0.34036	1.22276	0.0413252	ZCCHC3	0046872;0003676;0008270	metal ion binding ;nucleic acid binding ;zinc ion binding	ZCCHC3	171.147	149.231	135.606	142.038	143.745	143.206	156.202	126.642	197.863	147.37	145.23	129.512	184.959	169.585	175.205	175.315	127.692	99.7102	88.3853	178.035	197.863
1389264	ILMN_20212	OBFC2A	Homo sapiens oligonucleotide/oligosaccharide-binding fold containing 2A (OBFC2A), transcript variant 2, mRNA.	NM_022837.1	0.38249	0.2675	-1.4378	0.0414052	OBFC2A	3676	nucleic acid binding	OBFC2A	117.759	174.556	186.799	245.441	358.436	238.261	139.896	123.878	192.194	110.35	166.706	106.166	149.929	126.155	134.221	68.3867	130.521	121.649	176.003	105.879	358.436
1387665	ILMN_2233	LPL	Homo sapiens lipoprotein lipase (LPL), mRNA.	NM_000237.1	1.37242	0.96964	-1.42324	0.0414169	LPL	0006631;0016042;0008015;0004465;0016787;0005319;0008201;0042627;0016020;0005576	fatty acid metabolism ;lipid catabolism ;circulation ;lipoprotein lipase activity ;hydrolase activity ;lipid transporter activity ;heparin binding ;chylomicron ;membrane ;extracellular region	LPL	764.961	630.986	987.791	834.357	584.117	611.922	452.484	766.387	342.602	496.451	529.084	487.964	905.851	441.19	464.262	485.854	469.969	287.117	1144.94	339.547	1144.94
1377430	ILMN_918	LTBP3	Homo sapiens latent transforming growth factor beta binding protein 3 (LTBP3), mRNA.	NM_021070.2	0.43544	0.516	1.17847	0.0414307	LTBP3	0005509;0019838	calcium ion binding ;growth factor binding	LTBP3	224.099	174.98	251.927	194.651	185.031	242.266	196.519	200.637	188.221	293.017	239.025	297.835	234.512	222.505	243.552	230.888	252.867	284.09	167.681	318.092	318.092
1390763	ILMN_18147	FNDC3B	Homo sapiens fibronectin type III domain containing 3B (FNDC3B), mRNA.	NM_022763.2	0.72902	0.58422	-1.25478	0.0414905	FNDC3B	0007242;0006468;0016740;000166;0005524;0004713;0005634	intracellular signaling cascade ;protein amino acid phosphorylation ;transferase activity ;nucleotide binding ;ATP binding ;protein-tyrosine kinase activity ;nucleus	FNDC3B	434.393	279.614	229.584	302.854	491.034	312.431	341.951	408.501	288.525	266.859	244.854	423.793	287.525	316.036	239.367	258.628	236.965	316.294	520.891	319.113	520.891
1380413	ILMN_5088	MTX1	Homo sapiens metaxin 1 (MTX1), transcript variant 1, mRNA.	NM_002455.2	0.37791	0.44468	1.1702	0.0415001	MTX1	0015031;0005739;0016021;0019867	protein transport ;mitochondrion ;integral to membrane ;outer membrane	MTX1	151.622	198.357	153.949	159.693	230.22	199.503	193.778	147.919	183.393	238.274	171.96	201.558	193.865	226.464	209.84	222.796	229.091	245.042	157.963	275.306	275.306
1394279	ILMN_138322	PHLDA1	Homo sapiens pleckstrin homology-like domain, family A, member 1 (PHLDA1), mRNA.	NM_007350.2	0.8008	0.58418	-1.37842	0.0415532	PHLDA1	5634	nucleus	PHLDA1	405.471	479.026	350.96	372.453	365.522	301.198	336.893	421.44	300.346	240.093	346.495	336.142	294.718	249.363	322.541	211.312	356.796	224.468	748.25	231.283	748.25
1390565	ILMN_18516	FDPS	Homo sapiens farnesyl diphosphate synthase (farnesyl pyrophosphate synthetase, dimethylallyltranstransferase, geranyltranstransferase) (FDPS), mRNA.	NM_002004.2	0.45659	0.38103	-1.20495	0.0415752	FDPS	0008299;0006695;0016740;0004337	isoprenoid biosynthesis ;cholesterol biosynthesis ;transferase activity ;geranyltranstransferase activity	FDPS	200.588	228.315	204.589	168.096	171.133	203.27	286.943	253.006	190.724	214.5	195.486	129.99	223.012	136.328	179.474	218.042	185.344	298.649	212.075	164.42	298.649
1394854	ILMN_1349	TNRC15	Homo sapiens trinucleotide repeat containing 15 (TNRC15), mRNA.	NM_015575.2	1.01923	1.12093	1.09372	0.0415861	TNRC15	0030833;0030036;0006928;0005200;0005856;0005885;0005737	regulation of actin filament polymerization ;actin cytoskeleton organization and biogenesis ;cell motility ;structural constituent of cytoskeleton ;cytoskeleton ;Arp2/3 protein complex ;cytoplasm	TNRC15	552.244	545.675	555.581	450.585	524.757	536.901	538.891	576.194	529.874	605.131	562.617	547.519	639.317	504.579	624.879	591.207	650.783	453.325	450.608	507.931	650.783
1381740	ILMN_3302	SSR4	Homo sapiens signal sequence receptor, delta (translocon-associated protein delta) (SSR4), mRNA.	NM_006280.1	2.87163	2.38632	-1.21004	0.0415871	SSR4	0006886;0005509;0005784;0005783;0016021	intracellular protein transport ;calcium ion binding ;translocon complex ;endoplasmic reticulum ;integral to membrane	SSR4	1084.21	1673.73	1539.18	1247.12	1660.93	1539.62	1508.45	1342.51	1218.08	995.895	1391.23	1217.42	1001.28	1322.19	1401.45	1104.58	1456.46	1627.63	2177.79	1565.43	2177.79
1397281	ILMN_1032	COL6A3	Homo sapiens collagen, type VI, alpha 3 (COL6A3), transcript variant 2, mRNA.	NM_057164.2	0.14858	0.06614	-2.25895	0.0415877	COL6A3	0007155;0007517;0006817;0004867;0005198;0005515;0005578;0005589;0005737	cell adhesion ;muscle development ;phosphate transport ;serine-type endopeptidase inhibitor activity ;structural molecule activity ;protein binding ;extracellular matrix (sensu Metazoa) ;collagen type VI ;cytoplasm	COL6A3	64.0932	30.9306	70.0906	194.566	118.477	47.558	88.8565	30.4576	18.2488	18.5498	38.8059	40.4835	28.6997	38.2221	34.7367	31.6975	33.1651	37.5077	62.7647	48.9675	194.566
1388683	ILMN_20939	LRP1B	Homo sapiens low density lipoprotein-related protein 1B (deleted in tumors) (LRP1B), mRNA.	NM_018557.1	1.04639	1.2917	1.22763	0.0415916	LRP1B	0006898;0015031;0005509;0005041;0004872;0016020;0016021	receptor mediated endocytosis ;protein transport ;calcium ion binding ;low-density lipoprotein receptor activity ;receptor activity ;membrane ;integral to membrane	LRP1B	648.549	467.221	444.17	725.461	574.602	460.289	601.98	645.495	752.873	436.461	591.295	874.712	688.705	636.715	764.851	718.019	774.743	487.568	296.046	466.854	874.712
1384902	ILMN_26122	RAB27A	Homo sapiens RAB27A, member RAS oncogene family (RAB27A), transcript variant 1, mRNA.	NM_004580.3	0.06887	0.05101	-1.35773	0.0416517	RAB27A	0007264;0015031;000166;0003924;0005525	small GTPase mediated signal transduction ;protein transport ;nucleotide binding ;GTPase activity ;GTP binding	RAB27A	19.2575	35.5864	42.8281	22.5663	52.8247	33.354	32.0108	39.4872	27.5106	38.6308	21.4822	22.4396	17.8689	31.3454	27.8838	24.4349	6.19797	37.9989	53.2851	40.8581	53.2851
1394418	ILMN_137842	MTHFR	Homo sapiens 5,10-methylenetetrahydrofolate reductase (NADPH) (MTHFR), mRNA.	NM_005957.2	0.25686	0.32539	1.25981	0.0416521	MTHFR	0006555;0006520;0008015;0016491;0005515;0004489	methionine metabolism ;amino acid metabolism ;circulation ;oxidoreductase activity ;protein binding ;methylenetetrahydrofolate reductase (NADPH) activity	MTHFR	180.497	91.0975	127.049	91.1774	114.175	145.508	111.758	125.568	101.605	177.939	119.954	134.168	172.349	157.437	133.5	161.347	152.847	150.002	110.817	231.829	231.829
1384353	ILMN_26902	OR2T6	Homo sapiens olfactory receptor, family 2, subfamily T, member 6 (OR2T6), mRNA.	NM_001005471.1	0.06081	0.04479	-1.36501	0.042047	OR2T6	0007186;0004984;0004872;0016021	G-protein coupled receptor protein signaling pathway ;olfactory receptor activity ;receptor activity ;integral to membrane	OR2T6	24.1777	22.3237	30.3962	33.5463	20.6132	8.54667	39.2863	52.9261	12.8754	36.3724	21.0219	22.8134	23.5927	26.0778	22.0031	16.8005	13.9126	47.5632	54.1405	33.7989	54.1405
1396225	ILMN_11682	TSC22D1	Homo sapiens TSC22 domain family, member 1 (TSC22D1), transcript variant 1, mRNA.	NM_183422.1	8.41591	7.37411	-1.14761	0.042075	TSC22D1	0006355;0006350;0006366;0003700;0005634	regulation of transcription DNA-dependent ;transcription ;transcription from RNA polymerase II promoter ;transcription factor activity ;nucleus	TSC22D1	5473.88	5944.4	6071.22	4437.31	4910.17	5164.16	4190.94	4978.25	4524.82	4127.41	4720.39	4296.4	4475.39	4359.16	4070.26	3686.23	3905.23	2888.73	5089.76	3366.2	6071.22
1393125	ILMN_14812	JARID1B	Homo sapiens Jumonji, AT rich interactive domain 1B (RBP2-like) (JARID1B), mRNA.	NM_006618.3	1.13986	1.36573	1.19155	0.0421429	JARID1B	0006355;0045892;0008270;0016564;0005515;0003677;0005634	regulation of transcription DNA-dependent ;negative regulation of transcription DNA-dependent ;zinc ion binding ;transcriptional repressor activity ;protein binding ;DNA binding ;nucleus	JARID1B	843.332	742.476	370.724	690.635	610.086	409.979	536.907	591.352	720.259	718.833	563.379	723.014	737.56	830.568	713.617	813.061	689.776	589.232	471.518	595.389	843.332
1387668	ILMN_22332	FAM54B	Homo sapiens family with sequence similarity 54, member B (FAM54B), mRNA.	NM_019557.3	2.52144	2.89002	1.13986	0.0422512	FAM54B	0006355;0008270;0005515	regulation of transcription DNA-dependent ;zinc ion binding ;protein binding	FAM54B	1254.97	1275.53	1265.48	1297.26	1292.54	1424.98	1456.29	1769.37	1331.91	1663.15	1314.24	1449.35	1679.2	1432.47	1541.93	1538.68	1541.54	1246.64	1184.37	1993.84	1993.84
1394648	ILMN_137214	GABRB3	Homo sapiens gamma-aminobutyric acid (GABA) A receptor, beta 3 (GABRB3), transcript variant 1, mRNA.	NM_000814.3	2.40633	3.01579	1.24636	0.0422596	GABRB3	0006811;0007165;0005216;0005230;0004890;0030594;0045211;0005887	ion transport ;signal transduction ;ion channel activity ;extracellular ligand-gated ion channel activity ;GABA-A receptor activity ;neurotransmitter receptor activity ;postsynaptic membrane ;integral to plasma membrane	GABRB3	1561.54	1824.65	1279.37	1554.24	1109	1330.49	1281.53	1445.31	1304.91	1658.26	1124.82	1013.64	1971.09	1712.7	1974.39	2160.04	1440.23	891.146	746.197	1895.37	2160.04
1393788	ILMN_139401	ARIH2	Homo sapiens ariadne homolog 2 (Drosophila) (ARIH2), mRNA.	NM_006321.1	2.27499	2.63093	1.15008	0.0423882	ARIH2	0016567;0007275;0004842;0046872;0008270;000151;0005634	protein ubiquitination ;development ;ubiquitin-protein ligase activity ;metal ion binding ;zinc ion binding ;ubiquitin ligase complex ;nucleus	ARIH2	1593	959.557	1080.7	1132.84	1350.86	1483.52	1124.38	1324.84	1472.62	1409.53	1376.09	1560.75	1320.69	1299.14	1169.9	1759.15	1220.64	1104.27	931.863	1490.09	1759.15
1391855	ILMN_16608	PCDHGC3	Homo sapiens protocadherin gamma subfamily C, 3 (PCDHGC3), transcript variant 2, mRNA.	NM_032402.1	0.04441	0.05766	1.29122	0.0424293	PCDHGC3	0016339;0007156;0007155;0005509;0005515;0016020;0016021	calcium-dependent cell-cell adhesion ;homophilic cell adhesion ;cell adhesion ;calcium ion binding ;protein binding ;membrane ;integral to membrane	PCDHGC3	16.1759	12.1961	20.305	15.0209	22.6929	27.5753	14.2172	25.8299	24.9788	40.7699	16.4613	25.5593	22.0275	31.7312	32.3098	30.4658	20.6259	41.486	54.1124	50.1241	54.1124
1387774	ILMN_2228	STOX1	Homo sapiens storkhead box 1 (STOX1), mRNA.	NM_152709.3	0.70072	0.93669	1.32938	0.0424612	STOX1	0003677;0005634	DNA binding ;nucleus	STOX1	424.965	336.804	275.192	314.173	507.552	313.801	546.317	331.955	337.496	603.565	364.176	729.647	442.334	464.69	462.933	361.964	384.589	343.749	134.243	581.952	729.647
1383145	ILMN_28547	LCP1	Homo sapiens lymphocyte cytosolic protein 1 (L-plastin) (LCP1), transcript variant 5, mRNA.	NM_002298.2	0.78881	0.38168	-2.07814	0.0425638	LCP1	0004;0003779;0005509;0005515;0005829	biological process unknown ;actin binding ;calcium ion binding ;protein binding ;cytosol	LCP1	211.29	142.238	243.317	142.173	744.713	807.151	112.385	239.016	83.9004	385.801	148.58	245.578	253.617	254.925	149.86	59.632	133.768	675.395	634.417	146.286	807.151
1383256	ILMN_28481	ID2	Homo sapiens inhibitor of DNA binding 2, dominant negative helix-loop-helix protein (ID2), mRNA.	NM_002166.4	2.96859	3.72948	1.24939	0.0427774	ID2	0007275;0045449;0030528;0005634	development ;regulation of transcription ;transcription regulator activity ;nucleus	ID2	2641.16	1957.31	1721.42	1496.7	1999.64	1783.97	1661.47	1180.16	2067.83	2020.41	1730.59	1911.37	2240.37	1809.92	2173.67	2102.31	2644.8	1132.38	615.141	1491.15	2644.8
1383602	ILMN_27834	TRIM41	Homo sapiens tripartite motif-containing 41 (TRIM41), transcript variant 1, mRNA.	NM_033549.3	0.26929	0.3518	1.29923	0.0428773	TRIM41	0016567;0004842;0046872;0008270;000151	protein ubiquitination ;ubiquitin-protein ligase activity ;metal ion binding ;zinc ion binding ;ubiquitin ligase complex	TRIM41	164.624	89.5786	99.0211	70.9572	111.961	119.563	150.232	101.831	126.159	206.444	159.639	153.659	206.533	145.506	205.819	212.663	164.158	192.167	197.881	115.454	212.663
1390272	ILMN_18760	ECGF1	Homo sapiens endothelial cell growth factor 1 (platelet-derived) (ECGF1), mRNA.	NM_001953.2	0.06009	0.0291	-2.07636	0.0429038	ECGF1	0007267;0006935;0006206;0008152;0007166;0007600;0001525;0006220;0030154;0002;0006260;0005161;0016757;0009032;0008083;0005615;005625	cell-cell signaling ;chemotaxis ;pyrimidine base metabolism ;metabolism ;cell surface receptor linked signal transduction ;sensory perception ;angiogenesis ;pyrimidine nucleotide metabolism ;cell differentiation ;mitochondrial genome maintenance ;DNA replication ;platelet-derived growth factor receptor binding ;transferase activity transferring glycosyl groups ;thymidine phosphorylase activity ;g…	ECGF1	13.8112	19.133	27.1311	12.45	37.9591	57.8639	-1.41476	17.3575	12.9337	14.4808	5.36898	15.1331	17.2384	13.8471	13.4955	32.3259	0.46608	68.6598	68.1692	13.1977	68.6598
1385426	ILMN_25320	IL1A	Homo sapiens interleukin 1, alpha (IL1A), mRNA.	NM_000575.3	0.06738	0.03394	-1.99624	0.0429155	IL1A	0008283;0006915;0007267;0006916;0006935;0008285;00074;0001660;0005149;0004871;0005615;0005737	cell proliferation ;apoptosis ;cell-cell signaling ;anti-apoptosis ;chemotaxis ;negative regulation of cell proliferation ;regulation of cell cycle ;fever ;interleukin-1 receptor binding ;signal transducer activity ;extracellular space ;cytoplasm	IL1A	18.725	5.79458	74.3551	40.8891	37.5323	48.1456	18.9873	20.4371	4.05157	9.92589	19.0751	15.1319	35.0543	20.2028	31.7267	8.68343	4.26644	63.3229	24.5169	9.38769	74.3551
1381417	ILMN_3781	IL32	Homo sapiens interleukin 32 (IL32), transcript variant 3, mRNA.	NM_001012632.1	0.05541	0.01996	-2.79121	0.0429426	IL32	0006955;0007155;0005125;0005615	immune response ;cell adhesion ;cytokine activity ;extracellular space	IL32	7.87636	14.1031	16.4166	5.23154	59.449	1.15918	17.8208	26.9443	12.7552	11.8228	10.9342	8.06172	-12.1976	14.5288	10.0516	7.83243	-3.92957	79.8059	73.0142	21.0166	79.8059
1387762	ILMN_22266	SLC39A11	Homo sapiens solute carrier family 39 (metal ion transporter), member 11 (SLC39A11), mRNA.	NM_139177.2	0.56808	0.75384	1.31968	0.0429703	SLC39A11	0030001;0046873;0016020	metal ion transport ;metal ion transporter activity ;membrane	SLC39A11	301.58	253.701	265.241	280.492	364.425	277.13	249.31	275.366	378.392	588.243	271.763	604.57	335.116	350.636	350.051	290.899	316.085	369.61	169.762	290.015	604.57
1395496	ILMN_1263	TMEM25	Homo sapiens transmembrane protein 25 (TMEM25), mRNA.	NM_032780.2	0.31482	0.72695	2.29634	0.0430397	TMEM25	0016020;0016021	membrane ;integral to membrane	TMEM25	121.493	165.518	97.7428	171.728	97.5505	88.4661	589.219	92.1868	621.142	587.552	553.765	93.1854	667.809	141.271	92.0056	657.635	135.415	102.804	36.6584	157.923	667.809
1384462	ILMN_26831	NEK1	Homo sapiens NIMA (never in mitosis gene a)-related kinase 1 (NEK1), mRNA.	NM_012224.1	0.54212	0.64923	1.19097	0.0430665	NEK1	0007049;0051301;0007067;0006468;000166;000287;0005515;0016740;0004674;0005524;0004713;005634	cell cycle ;cell division ;mitosis ;protein amino acid phosphorylation ;nucleotide binding ;magnesium ion binding ;protein binding ;transferase activity ;protein serine/threonine kinase activity ;ATP binding ;protein-tyrosine kinase activity ;nucleus	NEK1	241.281	249.941	361.224	254.378	353.043	236.971	276.619	308.302	354.816	307.773	326.26	402.112	284.484	349.093	333.181	239.656	356.036	250.005	151.998	275.55	402.112
1382502	ILMN_29459	TOMM40	Homo sapiens translocase of outer mitochondrial membrane 40 homolog (yeast) (TOMM40), mRNA.	NM_006114.1	3.0148	3.33966	1.10165	0.043115	TOMM40	0006839;0006820;0006626;0015031;0008308;0005739;0005741;00016021	mitochondrial transport ;anion transport ;protein targeting to mitochondrion ;protein transport ;voltage-gated ion-selective channel activity ;mitochondrion ;mitochondrial outer membrane ;integral to membrane	TOMM40	2024.12	1665.98	1219.24	1522.56	1542.33	1670.32	1735.55	1778.92	1884.85	1707.68	1692.39	1785.13	1829.82	1536.25	1869.93	1995.87	1690.49	1614.44	1555.96	2011.17	2024.12
1392046	ILMN_16433	B3GNT6	Homo sapiens UDP-GlcNAc:betaGal beta-1,3-N-acetylglucosaminyltransferase 6 (B3GNT6), mRNA.	NM_006876.1	13.5645	15.741	1.15406	0.0431206	B3GNT6	0030311;0016757;0008532;0016020;0030173;0016021;0005795	poly-N-acetyllactosamine biosynthesis ;transferase activity transferring glycosyl groups ;N-acetyllactosaminide beta-13-N-acetylglucosaminyltransferase activity ;membrane ;integral to Golgi membrane ;integral to membrane ;Golgi stack	B3GNT6	10188.7	9876.65	7751.55	9305.56	7297.07	8943.77	8668.64	7949.03	8635.55	10261.6	7599.6	7585.64	10594.7	8491.33	10323.1	11706.5	9698.95	8388.21	4111.52	7913.06	11706.5
1378026	ILMN_8453	FLJ10922	Homo sapiens hypothetical protein FLJ10922 (FLJ10922), mRNA.	NM_018273.2	0.2725	0.32401	1.18249	0.0431544	FLJ10922	0016338;0042802;0005198;0005923;0016020;0016021	calcium-independent cell-cell adhesion ;protein self binding ;structural molecule activity ;tight junction ;membrane ;integral to membrane	FLJ10922	124.509	111.835	134.526	103.928	140.588	120.86	153.355	134.163	108.276	118.204	148.713	178.017	126.731	177.631	177.908	198.277	130.824	148.79	148.322	186.635	198.277
1380542	ILMN_5048	NPTX1	Homo sapiens neuronal pentraxin I (NPTX1), mRNA.	NM_002522.2	8.65711	10.3981	1.19448	0.0432004	NPTX1	0007268;0006810;0007417;0005509	synaptic transmission ;transport ;central nervous system development ;calcium ion binding	NPTX1	7123.03	5892.65	4086.29	4962.07	4292.78	4694.19	5153.83	8209.89	5086.05	5884.27	5242.41	5217.82	6581.77	5304.65	6163.55	7446.39	6492.11	3491.14	3324.53	6759.46	8209.89
1393131	ILMN_14819	C19orf10	Homo sapiens chromosome 19 open reading frame 10 (C19orf10), mRNA.	NM_019107.3	1.15612	0.99982	-1.16273	0.0432677	C19orf10	0006309;0006915;0007242;0004537;0004518;0016787;0005515;0005622;0005829;0005634	DNA fragmentation during apoptosis ;apoptosis ;intracellular signaling cascade ;caspase-activated deoxyribonuclease activity ;nuclease activity ;hydrolase activity ;protein binding ;intracellular ;cytosol ;nucleus	C19orf10	536.974	545.642	675.754	708.881	509.831	702.738	420.854	581.72	584.344	358.962	604.553	477.393	392.745	529.036	602.107	525.589	503.762	681.459	544.792	534.862	708.881
1386699	ILMN_23604	C2	Homo sapiens complement component 2 (C2), mRNA.	NM_000063.3	0.08495	0.04478	-1.90757	0.0433343	C2	0006955;0006958;0006508;0008233;0003813;0004295;0004263;0005603	immune response ;complement activation classical pathway ;proteolysis and peptidolysis ;peptidase activity ;classical-complement-pathway C3/C5 convertase activity ;trypsin activity ;chymotrypsin activity ;complement component C2 complex	C2	31.185	23.1106	41.8304	37.8517	38.5862	38.2637	13.0643	28.5765	17.8214	19.9722	28.727	15.3414	23.8279	24.6107	24.6345	4.84076	33.1161	121.478	73.2458	29.1089	121.478
1385497	ILMN_25430	WARS	Homo sapiens tryptophanyl-tRNA synthetase (WARS), transcript variant 4, mRNA.	NM_213646.1	1.11784	0.8836	-1.2721	0.0434472	WARS	0006412;0008285;0006436;000166;0004830;0005524;0016874;0005625;0005737	protein biosynthesis ;negative regulation of cell proliferation ;tryptophanyl-tRNA aminoacylation ;nucleotide binding ;tryptophan-tRNA ligase activity ;ATP binding ;ligase activity ;soluble fraction ;cytoplasm	WARS	661.099	881.854	761.58	599.997	545.864	622.342	513.804	279.138	485.059	263.04	492.392	352.591	397.721	568.522	558.898	495.679	534.648	449.853	475.703	350.377	881.854
1387333	ILMN_22729	SBF1	Homo sapiens SET binding factor 1 (SBF1), transcript variant 1, mRNA.	NM_002972.1	3.59452	4.10746	1.1364	0.0435213	SBF1	0006470;0046839;0008138;0004437;0016021;0005634	protein amino acid dephosphorylation ;phospholipid dephosphorylation ;protein tyrosine/serine/threonine phosphatase activity ;inositol or phosphatidylinositol phosphatase activity ;integral to membrane ;nucleus	SBF1	2071.85	2168.47	1586.02	1843.13	1613.28	2198.65	2368.28	2097.34	1693.03	2240.57	1973.88	1901.68	2815.26	2282.71	2449.57	2306.53	2077.6	1849.38	1843.03	2686.74	2815.26
1394365	ILMN_137692	GFRA1	Homo sapiens GDNF family receptor alpha 1 (GFRA1), transcript variant 1, mRNA.	NM_005264.2	0.06464	0.0445	-1.46086	0.0435828	GFRA1	0007166;0016167;0005102;0004872;0019898	cell surface receptor linked signal transduction ;glial cell line-derived neurotrophic factor receptor activity ;receptor binding ;receptor activity ;extrinsic to membrane	GFRA1	31.9313	13.5594	11.3078	23.8734	28.8722	31.0175	25.9396	51.376	14.1885	27.3616	20.3883	27.848	24.8124	27.3559	10.5416	21.6217	20.9055	70.2789	64.5982	32.1331	70.2789
1391043	ILMN_17897	NOPE	Homo sapiens likely ortholog of mouse neighbor of Punc E11 (NOPE), mRNA.	NM_020962.1	0.12787	0.19916	1.54894	0.0436321	NOPE	0007155;0005515;0016020	cell adhesion ;protein binding ;membrane	NOPE	60.7249	47.2688	46.2764	56.7574	136.785	76.3758	61.0391	43.8044	94.9714	127.384	67.3125	191.621	37.5636	88.7471	80.845	72.9693	81.4495	70.0779	50.5679	113.94	191.621
1390886	ILMN_18094	ZNF200	Homo sapiens zinc finger protein 200 (ZNF200), transcript variant 3, mRNA.	NM_198088.1	0.34669	0.42898	1.23056	0.0436964	ZNF200	0006355;0006350;0046872;0003676;0008270;0005634	regulation of transcription DNA-dependent ;transcription ;metal ion binding ;nucleic acid binding ;zinc ion binding ;nucleus	ZNF200	225.601	203.669	123.884	215.274	184.517	164.063	152.128	196.683	247.027	217.489	197.921	185.575	214	206.444	186.298	190.229	245.449	132.874	101.529	189.151	247.027
1385373	ILMN_25474	IQGAP3	Homo sapiens IQ motif containing GTPase activating protein 3 (IQGAP3), mRNA.	NM_178229.3	0.43	0.31613	-1.36773	0.0437008	IQGAP3	0007264;0046580;0006350;0003899;0005516;0005099	small GTPase mediated signal transduction ;negative regulation of Ras protein signal transduction ;transcription ;DNA-directed RNA polymerase activity ;calmodulin binding ;Ras GTPase activator activity	IQGAP3	211.342	102.355	164.857	215.457	222.985	164.665	286.938	309.588	91.972	110.97	105.674	154.901	155.432	99.9092	242.87	259.181	126.575	230.66	189.803	168.174	309.588
1396957	ILMN_10720	SLC14A1	Homo sapiens solute carrier family 14 (urea transporter), member 1 (Kidd blood group) (SLC14A1), mRNA.	NM_015865.1	0.3867	0.87089	2.23968	0.0437187	SLC14A1	0015840;0006810;0015204;0016021;0005887;0005886	urea transport ;transport ;urea transporter activity ;integral to membrane ;integral to plasma membrane ;plasma membrane	SLC14A1	110.612	92.2067	77.4649	70.2728	471.771	130.178	197.524	298.205	121.07	1031.04	111.971	960.363	205.372	612.204	461.483	296.131	325.184	339.431	118.95	285.537	1031.04
1381799	ILMN_3162	TIMP1	Homo sapiens TIMP metallopeptidase inhibitor 1 (TIMP1), mRNA.	NM_003254.2	4.30754	1.82339	-2.37548	0.043735	TIMP1	0008284;0043249;0051045;0007275;0004857;0008191;0005578	positive regulation of cell proliferation ;erythrocyte maturation ;negative regulation of membrane protein ectodomain proteolysis ;development ;enzyme inhibitor activity ;metalloendopeptidase inhibitor activity ;extracellular matrix (sensu Metazoa)	TIMP1	2764.74	786.045	577.589	1238.25	4867.98	2200.53	1233.35	1496.01	513.898	1462.29	592.793	1220.79	647.872	1033.87	938.408	1338.04	591.992	2171.49	6539.54	1196.73	6539.54
1384287	ILMN_27030	FOS	Homo sapiens v-fos FBJ murine osteosarcoma viral oncogene homolog (FOS), mRNA.	NM_005252.2	2.42669	0.85579	-2.85134	0.0437394	FOS	0006954;0006306;0006357;0046983;0003704;0043565;0005634	inflammatory response ;DNA methylation ;regulation of transcription from RNA polymerase II promoter ;protein dimerization activity ;specific RNA polymerase II transcription factor activity ;sequence-specific DNA binding ;nucleus	FOS	706.827	794.502	655.121	990.027	1438.47	1026.36	1453.69	155.87	324.028	935.335	513.347	448.074	511.433	136.074	295.2	142.194	416.935	4673.17	1298.55	594.374	4673.17
1392096	ILMN_16270	FAIM2	Homo sapiens Fas apoptotic inhibitory molecule 2 (FAIM2), mRNA.	NM_012306.2	14.9527	17.7505	1.18057	0.0437841	FAIM2	0006915;0006916;0005554;0016021	apoptosis ;anti-apoptosis ;molecular function unknown ;integral to membrane	FAIM2	10238.5	11586.4	7837.54	7949.73	6945.32	9449.12	8554.27	14157.9	7197.93	11575.3	9490.12	9258.15	11325.9	8895.49	11479	14963.8	10099.3	9076.94	7078.3	11291	14963.8
1377572	ILMN_8936	C18orf16	Homo sapiens chromosome 18 open reading frame 16 (C18orf16), mRNA.	NM_153010.3	0.06727	0.10424	1.54117	0.0437848	C18orf16	0008217;0006508;0005975;0046872;0016798;0008270;0004180;0004246;0005624;0016021;0016020;0005625;0005886	regulation of blood pressure ;proteolysis and peptidolysis ;carbohydrate metabolism ;metal ion binding ;hydrolase activity acting on glycosyl bonds ;zinc ion binding ;carboxypeptidase activity ;peptidyl-dipeptidase A activity ;membrane fraction ;integral to membrane ;membrane ;soluble fraction ;plasma membrane	C18orf16	19.7977	25.7305	35.2981	57.5048	27.3192	20.3892	39.0982	50.1563	57.4229	64.1343	27.9479	24.5114	26.557	72.7671	76.3661	60.486	30.0488	61.9932	15.0047	66.8217	76.3661
1396483	ILMN_11390	FLJ25422	Homo sapiens hypothetical protein FLJ25422 (FLJ25422), mRNA.	NM_145000.2	0.33136	0.60154	1.80537	0.0438271	FLJ25422	0018193;0006936;0005506;0005489;0004597;0005509;0008307;0005488;0016491;0016702;0005789;0016021;0030176;0016020	peptidyl-amino acid modification ;muscle contraction ;iron ion binding ;electron transporter activity ;peptide-aspartate beta-dioxygenase activity ;calcium ion binding ;structural constituent of muscle ;binding ;oxidoreductase activity ;oxidoreductase activity acting on single donors with incorporation of molecular oxygen incorporation of two atoms of oxygen ;endoplasmic reticulum membrane ;integ…	FLJ25422	243.32	129.895	52.0128	144.117	400.562	114.094	216.817	197.572	225.08	408.877	136.307	700.176	317.386	332.905	265.384	95.5242	263.039	103.026	39.1402	239.576	700.176
1386894	ILMN_23433	FPR1	Homo sapiens formyl peptide receptor 1 (FPR1), mRNA.	NM_002029.3	0.74398	0.21978	-3.40397	0.0438835	FPR1	0007263;0006935;0007165;0007186;0007600;0007188;000187;0006954;0006928;0004872;0001584;0004982;0016021;0005768;0005886	nitric oxide mediated signal transduction ;chemotaxis ;signal transduction ;G-protein coupled receptor protein signaling pathway ;sensory perception ;G-protein signaling coupled to cAMP nucleotide second messenger ;activation of MAPK activity ;inflammatory response ;cell motility ;receptor activity ;rhodopsin-like receptor activity ;N-formyl peptide receptor activity ;integral to membrane ;endoso…	FPR1	170.973	53.4813	194.627	56.7216	957.473	915.144	109.536	125.865	39.2251	172.933	54.1624	127.615	173.272	138.004	92.7142	67.5111	50.1662	839.323	345.886	129.335	957.473
1391835	ILMN_16806	PIAS1	Homo sapiens protein inhibitor of activated STAT, 1 (PIAS1), mRNA.	NM_016166.1	0.9395	1.10646	1.17121	0.0439648	PIAS1	0045893;0030521;0007165;0006512;0006350;0007259;0046872;0003714;0004004;0008270;0050681;0003713;0005515;0003677;0005634	positive regulation of transcription DNA-dependent ;androgen receptor signaling pathway ;signal transduction ;ubiquitin cycle ;transcription ;JAK-STAT cascade ;metal ion binding ;transcription corepressor activity ;ATP-dependent RNA helicase activity ;zinc ion binding ;androgen receptor binding ;transcription coactivator activity ;protein binding ;DNA binding ;nucleus	PIAS1	510.532	651.206	515.77	475.9	465.005	495.575	578.31	469.337	545.937	561.958	533.798	523.489	604.706	600.625	562.365	635.156	580.429	234.11	390.712	532.061	651.206
1394919	ILMN_13360	KLHL26	Homo sapiens kelch-like 26 (Drosophila) (KLHL26), mRNA.	NM_018316.1	0.34669	0.44696	1.28211	0.0439656	KLHL26	5515	protein binding	KLHL26	220.262	216.325	141.657	162.701	146.487	133.381	186.07	134.055	191.852	249.292	153.842	197.999	206.645	211.103	226.173	168.593	208.248	230.475	118.963	343.829	343.829
1378197	ILMN_8233	DDEF2	Homo sapiens development and differentiation enhancing factor 2 (DDEF2), mRNA.	NM_003887.1	1.30897	1.53637	1.16725	0.0440205	DDEF2	0043087;0046872;0005096;0005795	regulation of GTPase activity ;metal ion binding ;GTPase activator activity ;Golgi stack	DDEF2	727.083	755.747	758.492	877.97	703.055	582.947	743.189	608.099	953.998	636.802	959.778	890.22	870.791	750.173	815.32	717.113	772.046	670.108	346.418	697.996	959.778
1381732	ILMN_3294	B3GALT4	Homo sapiens UDP-Gal:betaGlcNAc beta 1,3-galactosyltransferase, polypeptide 4 (B3GALT4), mRNA.	NM_003782.3	0.35325	0.28272	-1.2564	0.0440458	B3GALT4	0006486;0016757;0008499;0008378;0047915;0016020;0016021;0005795	protein amino acid glycosylation ;transferase activity transferring glycosyl groups ;UDP-galactose:beta-N-acetylglucosamine beta-13-galactosyltransferase activity ;galactosyltransferase activity ;ganglioside galactosyltransferase activity ;membrane ;integral to membrane ;Golgi stack	B3GALT4	146.61	195.177	138.193	97.7954	206.457	157.454	163.942	231.832	105.999	183.233	126.228	85.8658	106.323	157.557	163.051	136.026	140.946	224.674	153.823	137.009	231.832
1384755	ILMN_26342	FRAP1	Homo sapiens FK506 binding protein 12-rapamycin associated protein 1 (FRAP1), mRNA.	NM_004958.2	2.09941	2.4406	1.1561	0.0441367	FRAP1	0006445;0007165;0030163;00074;0016049;0007584;0016310;0016301;0016740;0005488;0051219;0016773;0005942;0016020;0005737	regulation of translation ;signal transduction ;protein catabolism ;regulation of cell cycle ;cell growth ;response to nutrient ;phosphorylation ;kinase activity ;transferase activity ;binding ;phosphoprotein binding ;phosphotransferase activity alcohol group as acceptor ;phosphoinositide 3-kinase complex ;membrane ;cytoplasm	FRAP1	1340.31	1395.05	1221.53	1089.12	1162.28	1245.91	1404.51	842.22	1242.58	1268.37	1370.61	1316.92	1203.19	1385.51	1342.23	1277.17	1567.6	773.684	730.289	1022.09	1567.6
1382579	ILMN_29341	EMX1	Homo sapiens empty spiracles homolog 1 (Drosophila) (EMX1), mRNA.	NM_004097.1	0.41404	0.59807	1.43652	0.0442877	EMX1	0006355;0007275;0003700;0005634	regulation of transcription DNA-dependent ;development ;transcription factor activity ;nucleus	EMX1	354.339	225.165	230.421	148.326	186.419	328.533	215.104	217.568	205.489	390.426	300.893	220.686	458.113	285.196	274.964	327.991	339.906	79.3185	72.3235	163.842	458.113
1393751	ILMN_139292	EIF3S3	Homo sapiens eukaryotic translation initiation factor 3, subunit 3 gamma, 40kDa (EIF3S3), mRNA.	NM_003756.1	2.05438	1.71143	-1.20704	0.04444	EIF3S3	0006446;0006412;0003743;0005852	regulation of translational initiation ;protein biosynthesis ;translation initiation factor activity ;eukaryotic translation initiation factor 3 complex	EIF3S3	864.73	1323.82	1001.91	1094.8	1127.89	1121.85	1150.11	1179.43	1026.44	902.483	1044.42	845.514	845.637	881.477	963.141	698.315	850.416	561.81	1431.75	958.704	1431.75
1389617	ILMN_19836	FLJ25067	Homo sapiens hypothetical protein FLJ25067 (FLJ25067), mRNA.	NM_152504.2	0.26844	0.31018	1.14912	0.0444727	FLJ25067	0045087;0006508;0006958;0005509;0003815;0005615	innate immune response ;proteolysis and peptidolysis ;complement activation classical pathway ;calcium ion binding ;complement component C1r activity ;extracellular space	FLJ25067	122.242	119.207	140.274	110.669	162.735	140.699	124.862	119.337	130.077	156.584	173.068	137.384	161.33	154.06	127.879	149.62	106.1	110.111	155.226	182.941	182.941
1382543	ILMN_29523	LRRC54	Homo sapiens leucine rich repeat containing 54 (LRRC54), mRNA.	NM_015516.3	0.04377	0.0273	-1.6122	0.0447371	LRRC54	0008415;0016740;0003985;0005739	acyltransferase activity ;transferase activity ;acetyl-CoA C-acetyltransferase activity ;mitochondrion	LRRC54	11.805	19.835	2.78571	9.53576	29.2809	26.9614	11.4822	33.633	10.7901	3.83858	1.56263	8.20943	17.3788	8.77728	10.8266	26.244	15.6298	43.328	54.4442	29.1272	54.4442
1388267	ILMN_21651	CEACAM1	Homo sapiens carcinoembryonic antigen-related cell adhesion molecule 1 (biliary glycoprotein) (CEACAM1), transcript variant 1, mRNA.	NM_001712.3	0.06447	0.04706	-1.37749	0.044747	CEACAM1	0007565;0016477;0007229;0001525;0007156;0004872;0005624;0005887	pregnancy ;cell migration ;integrin-mediated signaling pathway ;angiogenesis ;homophilic cell adhesion ;receptor activity ;membrane fraction ;integral to plasma membrane	CEACAM1	21.6236	40.7915	41.148	24.5704	36.4336	37.4249	25.5386	13.9136	16.6553	20.7534	19.5599	16.7896	28.9648	13.3887	24.5727	22.2097	38.0205	54.462	47.8551	38.7875	54.462
1397431	ILMN_10095	LYN	Homo sapiens v-yes-1 Yamaguchi sarcoma viral related oncogene homolog (LYN), mRNA.	NM_002350.1	0.9295	0.62903	-1.48587	0.0448076	LYN	0007242;0006468;0004716;0016740;000166;0005515;0005524	intracellular signaling cascade ;protein amino acid phosphorylation ;receptor signaling protein tyrosine kinase activity ;transferase activity ;nucleotide binding ;protein binding ;ATP binding	LYN	332.244	250.633	338.991	267.742	663.199	848.838	444.25	327.966	230.235	427.742	194.977	370.267	299.738	405.85	381.371	157.018	223.767	730.467	490.546	418.36	848.838
1377743	ILMN_8733	FYB	Homo sapiens FYN binding protein (FYB-120/130) (FYB), transcript variant 2, mRNA.	NM_199335.2	0.3402	0.16385	-2.08773	0.0450015	FYB	0006955;0007165;0006607;0006468;0007243;0005102;0005515;0015629;0005634	immune response ;signal transduction ;NLS-bearing substrate-nucleus import ;protein amino acid phosphorylation ;protein kinase cascade ;receptor binding ;protein binding ;actin cytoskeleton ;nucleus	FYB	63.6216	90.3568	176.404	131.328	343.389	433.785	72.2422	88.7845	54.2399	140.396	81.0551	66.2005	76.5239	142.718	97.5941	25.3713	60.9446	129.612	172.897	38.1827	433.785
1394318	ILMN_138018	BDH	Homo sapiens 3-hydroxybutyrate dehydrogenase (heart, mitochondrial) (BDH), nuclear gene encoding mitochondrial protein, transcript variant 1, mRNA.	NM_004051.3	0.23373	0.28379	1.20749	0.0450211	BDH	0008152;0016491;0003858;0005759	metabolism ;oxidoreductase activity ;3-hydroxybutyrate dehydrogenase activity ;mitochondrial matrix	BDH	85.1234	113.348	150.907	122.68	126.116	90.689	135.65	112.5	168.074	110.214	126.29	152.678	113.468	149.24	114.611	113.504	176.033	124.685	77.1208	136.652	176.033
1386385	ILMN_24032	SYT6	Homo sapiens synaptotagmin VI (SYT6), mRNA.	NM_205848.1	0.23117	0.18068	-1.28653	0.0450875	SYT6	0006810;0005215;0005509;0016020;0016021;0008021;0045202	transport ;transporter activity ;calcium ion binding ;membrane ;integral to membrane ;synaptic vesicle ;synapse	SYT6	92.9174	101.286	146.322	85.0694	78.9631	86.0197	107.084	112.555	109.574	97.2642	104.215	89.5298	62.0584	53.2835	100.161	88.4835	68.3257	188.464	113.334	90.1958	188.464
1385877	ILMN_24845	ATF7IP2	Homo sapiens activating transcription factor 7 interacting protein 2 (ATF7IP2), mRNA.	NM_024997.2	0.31046	0.36726	1.17642	0.0451349	ATF7IP2	16021	integral to membrane	ATF7IP2	111.642	119.237	165.026	173.224	147.638	129.709	161.093	185.169	148.304	143.213	145.771	153.504	144.815	191.387	206.816	208.514	194.872	164.525	147.942	227.159	227.159
1390749	ILMN_18133	LOC388692	Homo sapiens hypothetical gene supported by AK123662 (LOC388692), mRNA.	NM_001013644.1	0.14676	0.18775	1.27221	0.045135	LOC388692	0006457;0005509;0003755;0016853;0005783	protein folding ;calcium ion binding ;peptidyl-prolyl cis-trans isomerase activity ;isomerase activity ;endoplasmic reticulum	LOC388692	83.3387	57.3113	71.7855	47.0765	73.9637	73.8851	65.3072	71.3086	86.6715	80.0058	70.7331	49.1203	119.699	75.89	75.3115	106.37	123.615	68.8062	115.136	100.563	123.615
1378106	ILMN_8336	BDH2	Homo sapiens 3-hydroxybutyrate dehydrogenase, type 2 (BDH2), mRNA.	NM_020139.3	0.14634	0.20945	1.42333	0.0452423	BDH2	0008152;0006635;0016491;0003858;0051287;0005739	metabolism ;fatty acid beta-oxidation ;oxidoreductase activity ;3-hydroxybutyrate dehydrogenase activity ;NAD binding ;mitochondrion	BDH2	96.1149	32.1091	45.0207	49.1423	83.5262	79.6299	85.1596	70.6504	78.6981	121.506	72.0782	179.402	110.095	77.0705	79.6662	79.7312	80.6721	134.291	46.689	117.846	179.402
1389534	ILMN_19935	APLP2	Homo sapiens amyloid beta (A4) precursor-like protein 2 (APLP2), mRNA.	NM_001642.1	1.32168	1.62981	1.22634	0.0453713	APLP2	0007186;0004867;0005488;0005515;0003677;0016021;0005634	G-protein coupled receptor protein signaling pathway ;serine-type endopeptidase inhibitor activity ;binding ;protein binding ;DNA binding ;integral to membrane ;nucleus	APLP2	911.284	717.942	814.459	703.802	759.574	774.351	828.778	544.954	883.911	886.969	890.69	677.042	1056.86	686.559	1075.65	916.024	1032.99	416.669	395.673	513.399	1075.65
1389456	ILMN_20038	WNK2	Homo sapiens WNK lysine deficient protein kinase 2 (WNK2), mRNA.	NM_006648.3	0.21703	0.27505	1.26033	0.0454052	WNK2	0006468;0007243;0004674;0016740;000166;0005524;0004713	protein amino acid phosphorylation ;protein kinase cascade ;protein serine/threonine kinase activity ;transferase activity ;nucleotide binding ;ATP binding ;protein-tyrosine kinase activity	WNK2	121.472	114.292	102.022	104.781	69.4507	127.811	133.632	88.719	97.1887	132.379	148.201	102.948	148.337	112.783	129.02	192.264	101.675	114.499	81.8538	141.667	192.264
1384992	ILMN_26025	PGBD5	Homo sapiens piggyBac transposable element derived 5 (PGBD5), mRNA.	NM_024554.2	1.57941	1.98307	1.24865	0.045424	PGBD5	6512	ubiquitin cycle	PGBD5	995.369	1080.07	931.937	1067.21	745.96	926.382	1206.37	726.586	1105.99	1054.81	999.771	838.82	1239.49	1047.79	1096.88	1111.26	1099.37	366.887	322.523	934.72	1239.49
1388532	ILMN_21166	PBEF1	Homo sapiens pre-B-cell colony enhancing factor 1 (PBEF1), transcript variant 1, mRNA.	NM_005746.1	0.35852	0.13901	-2.59342	0.0454716	PBEF1	0007267;0008284;0007165;0019363;0047280;0005125;0016757;0004516	cell-cell signaling ;positive regulation of cell proliferation ;signal transduction ;pyridine nucleotide biosynthesis ;nicotinamide phosphoribosyltransferase activity ;cytokine activity ;transferase activity transferring glycosyl groups ;nicotinate phosphoribosyltransferase activity	PBEF1	147.909	69.927	79.9969	84.4544	421.74	196.725	46.6975	112.184	72.6715	62.5774	60.9722	136.89	68.6068	60.7777	51.6874	33.7482	64.9756	124.859	485.434	63.0245	485.434
1396590	ILMN_11096	SPOP	Homo sapiens speckle-type POZ protein (SPOP), transcript variant 4, mRNA.	NM_001007228.1	0.04653	0.06291	1.34461	0.0455248	SPOP	0006397;0005515;0005634	mRNA processing ;protein binding ;nucleus	SPOP	11.3315	32.0065	24.9576	26.6082	25.8139	30.0196	29.4183	12.6388	30.1336	27.0057	26.7554	33.3684	36.7672	31.0096	17.6956	38.9967	22.5834	28.8296	20.3195	54.0343	54.0343
1389703	ILMN_19508	KIAA0020	Homo sapiens KIAA0020 (KIAA0020), transcript variant 2, mRNA.	NM_014878.3	0.46878	0.40594	-1.16121	0.0455453	KIAA0020	0003723;0005488;0005783;0005634	RNA binding ;binding ;endoplasmic reticulum ;nucleus	KIAA0020	209.492	216.946	194.216	254.047	283.769	245.974	253.758	219.56	252.106	142.897	227.908	161.979	189.246	239.611	166.848	191.704	193.935	164.818	250.544	198.319	283.769
1392457	ILMN_15887	KIAA1893	Homo sapiens G protein-regulated inducer of neurite outgrowth 1 (KIAA1893), mRNA.	NM_052899.1	0.70069	0.89496	1.27021	0.0456097	KIAA1893	0030503;0045184;0030968;0006980;0030970;0009749;0030433;0004872;0016209;0008430;0019899;0016021;0030176;005783	regulation of cell redox homeostasis ;establishment of protein localization ;unfolded protein response ;redox signal response ;retrograde protein transport ER to cytosol ;response to glucose stimulus ;ER-associated protein catabolism ;receptor activity ;antioxidant activity ;selenium binding ;enzyme binding ;integral to membrane ;integral to endoplasmic reticulum membrane ;endoplasmic reticulum	KIAA1893	502.027	337.474	348.712	275.649	338.368	467.24	458.574	337.003	372.745	520.507	333.176	335.658	655.688	351.479	544.325	530.521	475.5	221.57	250.195	415.023	655.688
1381964	ILMN_30272	OBSCN	Homo sapiens obscurin, cytoskeletal calmodulin and titin-interacting RhoGEF (OBSCN), mRNA.	NM_052843.2	0.05228	0.08373	1.5928	0.0456754	OBSCN	0051205;0005739;0016020;0016021	protein insertion into membrane ;mitochondrion ;membrane ;integral to membrane	OBSCN	29.7655	15.309	18.3345	34.9586	13.5104	54.5757	37.5111	23.9642	20.6456	79.0203	28.6136	28.9914	53.4975	33.0981	47.1337	29.1306	31.8177	17.887	20.55	61.5034	79.0203
1384020	ILMN_2730	CCRN4L	Homo sapiens CCR4 carbon catabolite repression 4-like (S. cerevisiae) (CCRN4L), mRNA.	NM_012118.2	0.37014	0.30061	-1.23811	0.0457138	CCRN4L	0006366;0048511;0003700;0005634	transcription from RNA polymerase II promoter ;rhythmic process ;transcription factor activity ;nucleus	CCRN4L	184.971	236.96	150.93	183.431	158.299	124.035	182.735	118.279	137.705	97.8187	131.715	161.339	109.629	151.432	174.323	181.58	143.113	239.283	217.58	152.23	239.283
1396951	ILMN_10714	KLHL3	Homo sapiens kelch-like 3 (Drosophila) (KLHL3), mRNA.	NM_017415.1	2.68398	3.0512	1.13055	0.0457794	KLHL3	0009168;0007275;0019239;0016787;0008083;0008372	purine ribonucleoside monophosphate biosynthesis ;development ;deaminase activity ;hydrolase activity ;growth factor activity ;cellular component unknown	KLHL3	1505.13	1196.98	1460.43	1666.06	1549.52	1391.06	1439.64	1760.9	1824.91	1535.51	1324.6	1739.69	1772.95	1835.14	1437.19	1930.9	1666.37	1123.62	1284.27	1290.02	1930.9
1377140	ILMN_9695	SCMH1	Homo sapiens sex comb on midleg homolog 1 (Drosophila) (SCMH1), transcript variant 2, mRNA.	NM_012236.1	0.12104	0.17175	1.4111	0.0457889	SCMH1	0016458;0006355;0007275;0016481;0016564;0005634	gene silencing ;regulation of transcription DNA-dependent ;development ;negative regulation of transcription ;transcriptional repressor activity ;nucleus	SCMH1	45.2736	33.2653	86.9862	68.1128	79.2914	57.2197	93.0444	31.7092	70.4319	86.7759	55.0634	121.448	67.7116	109.474	59.0851	89.3294	111.498	60.8817	57.3227	52.4721	121.448
1381824	ILMN_3192	ALOX5AP	Homo sapiens arachidonate 5-lipoxygenase-activating protein (ALOX5AP), mRNA.	NM_001629.2	1.35836	0.66365	-2.05813	0.0458015	ALOX5AP	0006954;0019370;0008047;0005488;0005624;0016021	inflammatory response ;leukotriene biosynthesis ;enzyme activator activity ;binding ;membrane fraction ;integral to membrane	ALOX5AP	283.471	418.9	932.479	437.971	1746.76	1364.09	248.478	460.875	212.51	585.986	254.07	383.631	726.226	574.704	211.792	41.2745	229.208	641.197	472.463	144.67	1746.76
1379414	ILMN_661	USP52	Homo sapiens ubiquitin specific peptidase 52 (USP52), mRNA.	NM_014871.2	0.56541	0.74013	1.30179	0.0458807	USP52	0006511;0004197;0004221;0004527;0016787;0005622	ubiquitin-dependent protein catabolism ;cysteine-type endopeptidase activity ;ubiquitin thiolesterase activity ;exonuclease activity ;hydrolase activity ;intracellular	USP52	146.574	132.095	253.999	234.069	391.048	468.545	245.76	353.751	347.334	485.541	265.57	488.979	430.01	419.437	245.561	369.867	359.805	272.196	294.432	291.505	488.979
1379967	ILMN_5806	CMTM4	Homo sapiens CKLF-like MARVEL transmembrane domain containing 4 (CMTM4), transcript variant 1, mRNA.	NM_178818.2	2.50267	3.04957	1.21181	0.0458974	CMTM4	0007600;0006935;0005125;0005615;0016020;0016021	sensory perception ;chemotaxis ;cytokine activity ;extracellular space ;membrane ;integral to membrane	CMTM4	1846.45	1310.45	1017.74	1560.3	1498.06	1598.59	1640.68	1123.97	1579.73	1965.88	1496.79	1304.22	2335.39	1438.79	1509.58	1712.04	1577.83	1215.66	649.557	1523.28	2335.39
1377400	ILMN_9350	P2RY13	Homo sapiens purinergic receptor P2Y, G-protein coupled, 13 (P2RY13), transcript variant 2, mRNA.	NM_176894.1	0.14159	0.11038	-1.28992	0.0459239	P2RY13	0006120;0003954;0008137;0016491;0005739	mitochondrial electron transport NADH to ubiquinone ;NADH dehydrogenase activity ;NADH dehydrogenase (ubiquinone) activity ;oxidoreductase activity ;mitochondrion	P2RY13	36.0048	75.3059	70.4078	76.6297	70.6456	64.428	58.7933	64.1078	51.1892	73.1629	63.3984	34.6047	56.8304	68.6087	56.6664	26.72	57.1451	105.548	89.3067	45.3803	105.548
1394671	ILMN_137270	CBFA2T2	Homo sapiens core-binding factor, runt domain, alpha subunit 2; translocated to, 2 (CBFA2T2), transcript variant 3, mRNA.	NM_001032999.1	0.29631	0.35159	1.18002	0.0459929	CBFA2T2	0008283;0006355;0046872;0003712;0003700;0005634	cell proliferation ;regulation of transcription DNA-dependent ;metal ion binding ;transcription cofactor activity ;transcription factor activity ;nucleus	CBFA2T2	170.936	124.141	145.372	131.566	159.985	164.971	164.829	153.608	156.987	192.959	160.654	145.654	206.498	171.426	184.574	171.779	171.925	127.675	104.354	128.932	206.498
1380847	ILMN_4576	MRRF	Homo sapiens mitochondrial ribosome recycling factor (MRRF), nuclear gene encoding mitochondrial protein, transcript variant 3, mRNA.	NM_199176.1	0.09848	0.1309	1.32194	0.0460462	MRRF	0006412;0005739	protein biosynthesis ;mitochondrion	MRRF	34.4244	35.1131	63.4338	33.7543	64.5328	41.7387	54.7236	54.0112	45.5161	74.8306	42.4835	64.4561	60.4102	80.8187	33.9983	99.1397	59.0367	58.3135	74.5354	67.132	99.1397
1394990	ILMN_13240	RASGEF1C	Homo sapiens RasGEF domain family, member 1C (RASGEF1C), transcript variant 1, mRNA.	NM_175062.3	0.08498	0.06112	-1.39817	0.0460677	RASGEF1C	0007264;0005085	small GTPase mediated signal transduction ;guanyl-nucleotide exchange factor activity	RASGEF1C	27.8418	38.6237	32.2536	35.1437	26.3144	23.7926	42.2696	62.7272	29.1553	36.992	26.8448	25.8954	26.3896	38.7327	20.3772	30.1367	22.1904	90.4695	71.8368	54.5992	90.4695
1381594	ILMN_3552	NMI	Homo sapiens N-myc (and STAT) interactor (NMI), mRNA.	NM_004688.1	0.44648	0.30696	-1.46257	0.0460771	NMI	0006954;0006366;0007259;0003712;0005515;0005737	inflammatory response ;transcription from RNA polymerase II promoter ;JAK-STAT cascade ;transcription cofactor activity ;protein binding ;cytoplasm	NMI	191.191	127.046	156.037	155.953	346.83	225.84	156.935	244.557	128.861	135.702	163.793	221.833	145.094	154.235	135.749	85.4771	126.327	153.302	422.352	179.778	422.352
1396435	ILMN_11313	CKS1B	Homo sapiens CDC28 protein kinase regulatory subunit 1B (CKS1B), mRNA.	NM_001826.1	0.41877	0.32001	-1.31585	0.0461613	CKS1B	0051301;0007049;0016301;0016538;0005515	cell division ;cell cycle ;kinase activity ;cyclin-dependent protein kinase regulator activity ;protein binding	CKS1B	215.193	220.01	161.753	202.849	256.661	236.038	150.764	185.328	200.493	90.9545	218.957	162.734	148.87	110.833	138.501	115.213	150.845	105.9	305.319	199.062	305.319
1390910	ILMN_17926	CNOT6	Homo sapiens CCR4-NOT transcription complex, subunit 6 (CNOT6), mRNA.	NM_015455.3	0.69742	0.8293	1.18255	0.0461645	CNOT6	0006355;0006350;000287;0004527;0003723;0016787;0005634	regulation of transcription DNA-dependent ;transcription ;magnesium ion binding ;exonuclease activity ;RNA binding ;hydrolase activity ;nucleus	CNOT6	350.358	308.114	220.307	293.25	322.762	410.595	360.95	452.25	293.017	545.641	437.246	383.992	462.5	391.607	436.754	415.638	448.366	392.406	345.744	364.71	545.641
[truncated: 68 more rows]
